# Supplementary material for: GolpHCat (TMEM87A), a unique voltage-dependent cation channel in Golgi apparatus, contributes to Golgi-pH maintenance and hippocampus-dependent memory
Source: Research Square preprint supplement (doi:10.21203/rs.3.rs-4015466/v1), 2024-03-20
Supplement: Supplementary file 1 [file ef7a132f2762e04a9426ff0c.xlsx]

## Sheet: Fig.1b
Figure. 1b
	Time	Scrambled														shTMEM87A
	0	6.40441	6.47794	6.21324	6.30147	6.21814	6.03431	6.31618	6.3701	6.15196	6.35784	6.40196	6.30882	6.20588	6.42892	6.73529	6.76961	6.87255	6.44118	6.44608	6.34559	6.56618	6.57598	6.69853	6.65686	6.52451	6.58333	6.73775	6.40441	6.51961	6.57108	6.60294	6.43628
	30	6.46324	6.44853	6.22059	6.2402	6.20588	6.09804	6.29412	6.36029	6.11765	6.33824	6.47304	6.26716	6.21569	6.27206	6.71078	6.60539	6.83824	6.42402	6.46078	6.3652	6.6152	6.56128	6.57353	6.55147	6.48284	6.58088	6.7549	6.58824	6.58088	6.625	6.57108	6.50245
	60	6.40686	6.4902	6.23039	6.27206	6.18628	6.15196	6.34559	6.39216	6.13971	6.22304	6.40931	6.375	6.19853	6.28186	6.71569	6.58578	6.85539	6.40686	6.42402	6.41422	6.59314	6.50735	6.66176	6.59069	6.5098	6.60294	6.66176	6.46569	6.57353	6.56372	6.57598	6.51225
	90	6.41176	6.46569	6.2549	6.28676	6.16422	6.01961	6.39216	6.38725	6.08824	6.23284	6.375	6.28186	6.22794	6.19608	6.72059	6.57108	6.77696	6.44118	6.50245	6.43137	6.59069	6.44853	6.48284	6.56128	6.51961	6.5098	6.76471	6.60049	6.61275	6.5049	6.57598	6.49755
	120	8.1299	8.21078	7.125	7.82353	7.2451	7.33578	7.8848	7.83578	8.08088	8.31372	7.70098	7.77451	8.13725	7.6152	7.58333	7.97059	7.63725	7.69853	7.86765	7.48529	7.59314	7.54167	7.78676	7.60049	7.87745	7.78676	7.37255	7.7598	7.60784	7.91667	7.58578	7.56618
	150	7.88725	7.90931	7.54412	7.49265	7.16912	7.20098	7.79657	7.83333	7.94363	8.01961	7.73284	7.48775	7.70833	7.54412	7.56128	7.82108	7.56128	7.48284	7.81863	7.40441	7.53922	7.22794	7.52451	7.60294	7.78676	7.76961	7.12745	7.75735	7.53431	7.47304	7.39951	7.52206
	180	7.58088	7.58824	7.19118	7.38235	7.03186	7.32353	7.85294	7.82843	7.76471	7.51225	7.60294	7.51716	7.42647	7.17157	7.52451	7.59069	7.45343	7.23284	7.43137	7.44608	7.41176	7.18628	7.48775	7.44608	7.38725	7.33333	7.10784	7.20343	7.30637	7.19118	7.39461	7.3799
	210	7.51961	7.56863	6.97304	7.32353	6.93382	6.91176	7.04412	7.3848	7.48529	7.22304	7.44853	7.28431	7.47549	7.05147	7.44608	7.45098	7.22794	7.03431	7.5098	7.39461	7.42647	7.22304	7.45833	7.45833	7.08578	7.17892	7.09069	7.16176	7.14461	7.04902	7.25245	7.01471
	240	7.31863	7.48284	6.91176	7.23775	6.89216	6.94608	7.0098	7.35539	7.23039	7.21814	7.42892	7.23775	7.09559	6.94363	7.3652	7.44118	7.15196	7	7.21814	7.34069	7.5	7.2451	7.28186	7.27206	7.09804	7.12255	7.18872	7.07108	7.01716	7.11029	7.17892	6.92647
	270	7.15686	7.28431	6.80882	7.1152	6.84804	7.27941	6.81863	7.13971	7.05882	7.10049	7.59804	7.09069	6.95588	6.91912	7.46078	7.35539	7.00735	6.97549	7.23284	7.43628	7.08088	7.21078	6.70588	7.32353	6.95343	6.94608	7.08824	6.87255	7	6.95588	7.0098	7.01471
	300	7.1348	7.22794	6.88725	7.03186	6.76716	7.09804	6.84069	7.03431	6.96814	6.91667	7.29902	7.05147	6.85294	6.88725	7.17157	7.30392	6.99265	6.83578	7.18872	7.41912	7.58578	7.50245	6.71324	7.24265	6.96324	6.93382	7.10784	6.84314	6.96814	6.96569	6.94363	6.95343
	330	7.06128	7.1348	6.78922	6.95343	6.71078	7.13971	6.77451	6.97059	6.88235	6.89216	7.14706	6.99265	6.95098	6.90441	7.01961	7.12255	6.92157	6.76225	6.95833	7.20588	7.17647	6.97059	6.78922	7.16176	6.92402	6.88725	7.11765	6.86029	6.96078	6.90196	6.94363	7.01471
	360	6.99755	7.16422	6.81128	6.92157	6.70343	7.07843	6.63235	6.80637	6.75735	6.7598	7.10049	7.08578	6.89951	6.8848	7.03186	7.10294	6.83088	6.75245	6.90686	7.23284	7.01225	6.95588	6.77451	7.15441	6.84314	6.83333	6.93872	6.80637	6.93872	6.77696	6.98775	6.97794
	390	6.96324	7.07353	6.72549	6.86765	6.68628	7.41176	6.61765	6.74755	6.63971	6.77206	6.86029	6.89951	6.89216	6.85049	7.00245	6.92402	6.81372	6.66912	6.84559	7.09069	7.21324	6.85539	6.69363	7.14706	6.93628	6.86029	6.88725	6.79412	6.88725	6.875	6.95343	6.82108
	420	6.93872	7.03922	6.68382	7.05147	6.68137	7.2598	6.65931	6.72794	6.59314	6.88235	6.79902	6.83333	6.77206	6.76961	6.92892	6.92647	6.81128	6.67402	6.7598	6.99755	7.06618	6.81618	6.69363	7.04412	7	6.77696	6.86029	6.83578	6.86029	6.85294	6.94608	6.84559
	450	6.94853	7.02941	6.68628	6.85539	6.58088	7.38725	6.62255	6.66422	6.58578	6.68578	6.96324	6.93628	6.71324	6.84069	6.89951	6.90441	6.92402	6.6348	6.65686	6.94363	7.01471	6.87745	6.6299	7.09559	7.05637	6.77451	6.88725	6.64216	6.88725	6.81863	6.94363	6.91667

## Sheet: Fig.1c
Figure. 1c
	Scrambled	TMEM87A shRNA
	6.41176	6.72059
	6.46569	6.57108
	6.2549	6.77696
	6.28676	6.44118
	6.16422	6.50245
	6.01961	6.43137
	6.39216	6.59069
	6.38725	6.44853
	6.08824	6.48284
	6.23284	6.56128
	6.375	6.51961
	6.28186	6.5098
	6.22794	6.76471
	6.19608	6.60049
	6.2598	6.61275
	6.36029	6.5049		Unpaired t test
	6.09559	6.57598		P value	<0.0001
	6.35294	6.49755		P value summary	****
	6.17892			Significantly different (P < 0.05)?	Yes
	6.17647			One- or two-tailed P value?	Two-tailed
	6.23529			t, df	t=8.453, df=37

## Sheet: Fig.1d
Figure. 1d
	Scrambled	TMEM87A shRNA
	8.1299	7.58333
	8.21078	7.97059
	7.625	7.63725
	7.82353	7.69853
	7.2451	7.86765
	7.33578	7.48529
	7.8848	7.59314
	7.83578	7.54167
	8.08088	7.78676
	8.31372	7.60049
	7.70098	7.87745
	7.77451	7.78676
	8.13725	7.37255
	7.6152	7.7598
	8.46078	7.60784
	8.51471	7.91667		Unpaired t test
	7.52696	7.58578		P value	0.035
	7.57353	7.56618		P value summary	*
	8.72794			Significantly different (P < 0.05)?	Yes
	7.7549			One- or two-tailed P value?	Two-tailed
	7.59069			t, df	t=2.189, df=37

## Sheet: Fig.1f
Figure. 1f
	mV \ I	Control	TMEM87A WT	TMEM87A -AAA
	100	5.45151	29.4966	4.63867
	99.975	5.29491	29.822	4.47591
	99.95	5.30726	29.5639	4.31315
	99.925	5.43454	29.4091	4.43522
	99.9	5.32475	29.158	4.63867
	99.875	5.22785	28.9154	4.59798
	99.85	5.15994	28.9826	4.35384
	99.825	5.29857	29.2823	4.43522
	99.8	5.19559	29.4958	4.47591
	99.775	5.11504	29.5714	4.67936
	99.75	5.15986	29.3165	4.63867
	99.725	5.30883	29.3587	4.39453
	99.7	5.16846	29.5122	4.35384
	99.675	5.04748	29.6073	4.39453
	99.65	5.12666	29.7108	4.43522
	99.625	5.21806	29.771	4.23177
	99.6	5.21103	29.7838	4.39453
	99.575	5.12142	29.5118	4.35384
	99.55	5.16186	29.5263	4.35384
	99.525	5.22	29.3325	4.43522
	99.5	5.15881	29.2135	4.47591
	99.475	5.10027	29.2936	4.35384
	99.45	5.02943	29.511	4.35384
	99.425	5.13838	29.3441	4.47591
	99.4	5.23892	29.172	4.35384
	99.375	5.18297	29.0671	4.35384
	99.35	5.05039	28.8225	4.19108
	99.325	4.98847	28.673	4.35384
	99.3	5.148	28.8519	4.5166
	99.275	5.26546	28.9534	4.27246
	99.25	5.06461	28.7843	4.39453
	99.225	5.16216	28.763	4.35384
	99.2	5.16717	28.9125	4.43522
	99.175	5.16951	28.7889	4.23177
	99.15	5.08392	28.8196	4.27246
	99.125	5.11341	28.8697	4.27246
	99.1	5.26285	29.1333	4.35384
	99.075	5.23697	29.2499	4.35384
	99.05	5.11927	29.3108	4.63867
	99.025	5.15372	29.334	4.76074
	99	5.23144	29.5937	4.67936
	98.975	5.18494	29.7046	4.47591
	98.95	5.05016	29.5162	4.23177
	98.925	5.06122	29.3949	4.5166
	98.9	5.17301	28.9786	4.59798
	98.875	5.18381	28.8694	4.55729
	98.85	5.08037	28.9883	4.39453
	98.825	5.08576	29.0017	4.43522
	98.8	5.21015	28.6916	4.35384
	98.775	5.15454	28.7039	4.1097
	98.75	5.09028	28.8548	4.19108
	98.725	5.08386	28.9577	4.5166
	98.7	5.14577	29.1588	4.63867
	98.675	5.18485	29.366	4.59798
	98.65	5.11026	29.3146	4.5166
	98.625	4.99372	28.934	4.19108
	98.6	5.1541	28.7816	4.27246
	98.575	5.20866	28.6736	4.31315
	98.55	5.08948	28.7915	4.5166
	98.525	5.12167	28.8063	4.55729
	98.5	5.172	28.803	4.55729
	98.475	5.12763	28.5454	4.67936
	98.45	5.01647	28.5985	4.27246
	98.425	5.00382	28.6142	4.27246
	98.4	5.10839	28.4405	4.15039
	98.375	5.22455	28.393	4.39453
	98.35	5.2478	28.344	4.27246
	98.325	5.1567	28.444	4.35384
	98.3	5.10792	28.532	4.43522
	98.275	5.10334	28.6232	4.39453
	98.25	5.01056	28.8877	4.35384
	98.225	5.06368	28.8699	4.1097
	98.2	5.19062	28.7925	4.59798
	98.175	5.24937	28.8666	4.55729
	98.15	5.14666	28.8963	4.59798
	98.125	5.08249	28.9	4.43522
	98.1	5.10993	28.9161	4.35384
	98.075	5.17161	29.2016	4.35384
	98.05	5.10906	29.1201	4.43522
	98.025	5.05545	28.9037	4.35384
	98	5.1159	28.7887	4.31315
	97.975	5.19709	28.7943	4.35384
	97.95	5.09852	28.9728	4.23177
	97.925	5.04897	29.1386	4.23177
	97.9	5.09493	29.0281	4.5166
	97.875	5.12926	29.0847	4.43522
	97.85	5.11951	29.1662	4.35384
	97.825	5.08321	28.9888	4.35384
	97.8	5.05857	28.9789	4.31315
	97.775	5.15399	29.1242	4.5166
	97.75	5.09509	29.1753	4.06901
	97.725	5.06062	28.8379	4.02832
	97.7	5.14615	28.6098	4.1097
	97.675	5.173	28.6059	4.31315
	97.65	5.03994	28.6351	4.5166
	97.625	4.91973	28.7147	4.31315
	97.6	4.933	28.7257	4.19108
	97.575	5.12774	28.9692	4.1097
	97.55	5.22618	29.1462	4.23177
	97.525	5.06865	29.2367	4.19108
	97.5	4.93518	29.0496	4.19108
	97.475	5.08989	28.8086	4.06901
	97.45	5.13047	28.6406	3.90625
	97.425	5.08092	28.6741	4.19108
	97.4	4.9786	28.9609	4.06901
	97.375	5.12884	29.231	4.1097
	97.35	5.13786	29.2217	4.19108
	97.325	4.98449	29.4935	4.35384
	97.3	4.90582	29.4478	4.23177
	97.275	4.98986	29.2094	4.06901
	97.25	5.07462	29.0309	4.02832
	97.225	5.09085	29.0802	4.1097
	97.2	5.02083	29.2988	3.98763
	97.175	5.12047	29.2375	4.1097
	97.15	5.14769	29.0145	4.27246
	97.125	5.01418	29.0839	4.06901
	97.1	4.95482	29.052	4.1097
	97.075	5.07071	29.1952	4.02832
	97.05	5.14061	29.3188	4.06901
	97.025	5.06847	29.3267	4.47591
	97	4.97966	29.1263	4.23177
	96.975	4.85433	28.8612	3.86556
	96.95	4.99969	28.6657	3.94694
	96.925	5.03431	28.8691	4.27246
	96.9	5.00721	29.1164	4.19108
	96.875	4.89334	29.1184	4.02832
	96.85	4.92502	28.9688	3.90625
	96.825	5.03455	28.9163	4.02832
	96.8	5.0584	29.0112	4.27246
	96.775	5.06423	28.7536	4.31315
	96.75	5.14287	28.6477	4.27246
	96.725	5.06651	28.9271	3.98763
	96.7	4.96379	28.7338	3.82487
	96.675	4.99923	28.6735	3.94694
	96.65	5.10658	28.7754	4.27246
	96.625	5.07593	29.0127	4.1097
	96.6	4.9448	29.1806	4.31315
	96.575	4.86944	29.0632	4.39453
	96.55	5.0045	29.1159	4.15039
	96.525	5.04215	29.1897	3.98763
	96.5	4.99527	29.0089	4.06901
	96.475	4.99783	28.8175	4.5166
	96.45	5.00836	28.4829	4.5166
	96.425	4.90897	28.2926	4.23177
	96.4	4.82399	28.258	3.90625
	96.375	4.80732	28.018	4.1097
	96.35	4.86631	27.6392	4.27246
	96.325	4.99847	27.4333	4.19108
	96.3	4.95696	27.4835	4.1097
	96.275	4.81034	27.674	4.31315
	96.25	4.81831	27.7988	4.43522
	96.225	4.91156	27.9097	4.19108
	96.2	4.94544	27.8126	3.90625
	96.175	4.98678	27.6873	3.90625
	96.15	4.91579	27.4843	4.06901
	96.125	4.97103	27.2917	4.19108
	96.1	4.94119	27.4	3.98763
	96.075	4.9111	27.5117	4.06901
	96.05	4.85185	27.6658	4.06901
	96.025	4.88834	27.7054	4.31315
	96	4.89933	27.6282	4.27246
	95.975	4.85844	27.4705	4.31315
	95.95	4.86511	27.6297	3.82487
	95.925	4.94813	27.7414	3.94694
	95.9	4.96381	27.7251	4.39453
	95.875	4.96653	27.7181	4.23177
	95.85	4.84518	27.8894	3.90625
	95.825	4.8827	27.9587	3.94694
	95.8	4.89785	27.9665	4.43522
	95.775	5.00936	28.0918	4.31315
	95.75	4.86305	28.2432	4.23177
	95.725	4.84541	28.0677	4.27246
	95.7	4.88975	27.8448	4.1097
	95.675	4.93683	28.0266	3.94694
	95.65	4.85146	28.3164	4.27246
	95.625	4.83082	28.3545	4.27246
	95.6	4.85569	28.3264	3.86556
	95.575	4.92108	28.4195	4.1097
	95.55	4.83752	28.6533	4.47591
	95.525	4.85845	28.7014	4.39453
	95.5	4.87295	28.6231	4.19108
	95.475	4.89812	28.6607	4.06901
	95.45	4.87976	28.5421	4.23177
	95.425	4.94559	28.2515	4.39453
	95.4	4.9941	28.2425	4.23177
	95.375	5.00772	28.3734	4.15039
	95.35	4.8377	28.5037	4.27246
	95.325	4.90346	28.4565	4.19108
	95.3	4.91441	28.4742	4.19108
	95.275	4.96129	28.399	4.31315
	95.25	4.85368	28.1656	4.43522
	95.225	4.90494	28.0689	4.27246
	95.2	4.93903	27.8811	4.1097
	95.175	5.05569	27.8327	3.94694
	95.15	4.9211	27.7435	3.86556
	95.125	4.87567	27.4671	4.1097
	95.1	4.87241	27.3275	4.19108
	95.075	4.91146	27.2273	4.15039
	95.05	4.98437	26.9584	4.02832
	95.025	4.88171	26.7381	4.06901
	95	4.88978	26.8326	3.86556
	94.975	4.89351	27.1957	3.74349
	94.95	4.89719	27.5138	4.1097
	94.925	4.90723	27.6664	4.39453
	94.9	4.90848	27.6565	4.35384
	94.875	4.92101	27.6457	4.19108
	94.85	4.88276	27.7368	4.1097
	94.825	4.88565	27.4636	3.94694
	94.8	4.78438	27.6676	4.15039
	94.775	4.96107	28.0157	4.35384
	94.75	4.92026	27.9579	3.98763
	94.725	4.88085	28.0872	4.15039
	94.7	4.81723	28.0681	4.35384
	94.675	4.87757	28.1007	4.27246
	94.65	4.8536	28.0805	4.15039
	94.625	4.94624	28.123	4.35384
	94.6	4.95886	28.1601	3.94694
	94.575	4.96665	28.2683	4.02832
	94.55	4.94206	28.0622	3.86556
	94.525	4.91099	27.9263	3.86556
	94.5	4.89627	28.1028	4.1097
	94.475	4.94054	27.9507	4.1097
	94.45	4.94636	27.8865	4.27246
	94.425	4.9409	28.0969	4.27246
	94.4	4.86128	28.0325	4.06901
	94.375	4.91699	27.8829	3.86556
	94.35	5.03371	27.8133	4.39453
	94.325	5.05674	27.8621	4.15039
	94.3	5.02449	27.7795	4.06901
	94.275	5.00155	27.6277	4.27246
	94.25	4.88374	27.5198	4.35384
	94.225	4.86234	27.6612	4.27246
	94.2	4.87799	27.6736	3.98763
	94.175	5.04045	27.6066	3.78418
	94.15	5.03989	27.6333	4.06901
	94.125	4.97211	27.744	4.02832
	94.1	4.79759	27.5093	4.1097
	94.075	4.80824	27.3289	4.43522
	94.05	4.93385	27.5049	4.39453
	94.025	4.90102	27.6816	4.27246
	94	4.85361	27.5893	4.19108
	93.975	4.91215	27.4382	4.31315
	93.95	4.94893	27.4219	4.19108
	93.925	4.93385	27.5556	4.19108
	93.9	4.83751	27.4876	4.06901
	93.875	4.83522	27.2557	4.02832
	93.85	4.87406	27.3505	4.23177
	93.825	4.93791	27.4363	4.27246
	93.8	4.84531	27.4991	4.39453
	93.775	4.84542	27.6054	4.47591
	93.75	4.88449	27.4256	4.02832
	93.725	4.95988	27.3731	3.98763
	93.7	4.94905	27.4551	4.27246
	93.675	4.9356	27.5188	4.1097
	93.65	5.06659	27.6239	3.78418
	93.625	5.01333	27.6689	4.1097
	93.6	4.85885	27.6444	4.02832
	93.575	4.72106	27.4434	4.02832
	93.55	4.90877	27.2105	4.43522
	93.525	5.00767	27.0317	4.5166
	93.5	4.91589	26.8734	4.1097
	93.475	4.78909	26.964	3.98763
	93.45	4.85471	27.0957	4.19108
	93.425	4.90168	27.1507	4.27246
	93.4	4.85531	27.0883	4.27246
	93.375	4.81067	27.2361	4.1097
	93.35	4.79683	27.3724	3.66211
	93.325	4.87271	27.317	3.90625
	93.3	4.88332	27.4067	4.06901
	93.275	4.89613	27.5266	4.19108
	93.25	4.91646	27.2752	4.15039
	93.225	4.94683	27.2912	4.15039
	93.2	4.79746	27.394	3.7028
	93.175	4.71461	27.3114	3.94694
	93.15	4.80847	27.2032	4.31315
	93.125	4.87515	27.3531	3.94694
	93.1	4.80943	27.4467	4.31315
	93.075	4.75929	27.3341	4.39453
	93.05	4.80702	27.2705	3.86556
	93.025	4.86726	27.0521	4.06901
	93	4.85643	26.706	4.19108
	92.975	4.71191	26.9024	4.1097
	92.95	4.77395	27.352	4.23177
	92.925	4.82924	27.4964	4.31315
	92.9	4.88861	27.2935	4.23177
	92.875	4.81537	27.0617	4.19108
	92.85	4.75397	27.1441	4.1097
	92.825	4.7551	27.0336	3.86556
	92.8	4.77306	27.1129	3.62142
	92.775	4.75223	27.321	4.06901
	92.75	4.71669	27.3843	4.19108
	92.725	4.83232	27.3356	4.06901
	92.7	4.83185	27.4145	3.98763
	92.675	4.69978	27.434	3.98763
	92.65	4.68066	27.5921	4.35384
	92.625	4.7908	27.6785	4.31315
	92.6	4.78727	27.6063	3.98763
	92.575	4.80512	27.4991	4.1097
	92.55	4.68133	27.3932	4.06901
	92.525	4.79229	27.4199	4.15039
	92.5	4.88673	27.3781	4.06901
	92.475	4.74015	27.1187	4.06901
	92.45	4.67542	27.0618	4.19108
	92.425	4.71172	26.9269	4.06901
	92.4	4.78729	26.801	4.15039
	92.375	4.70939	26.8179	3.78418
	92.35	4.61312	26.7705	4.19108
	92.325	4.70766	26.5995	4.1097
	92.3	4.82317	26.4516	3.98763
	92.275	4.80419	26.3769	4.27246
	92.25	4.63987	26.4404	4.27246
	92.225	4.62017	26.6873	4.02832
	92.2	4.69334	26.8634	4.02832
	92.175	4.78907	26.9536	3.86556
	92.15	4.71316	27.061	3.98763
	92.125	4.68552	27.199	3.94694
	92.1	4.64393	27.177	3.94694
	92.075	4.65047	27.1228	4.06901
	92.05	4.60841	26.9126	4.02832
	92.025	4.66007	26.9718	3.94694
	92	4.75975	27.0332	3.94694
	91.975	4.76255	26.865	4.15039
	91.95	4.58018	26.7305	4.31315
	91.925	4.59087	26.5303	4.1097
	91.9	4.73508	26.3783	4.1097
	91.875	4.65633	26.3179	3.98763
	91.85	4.57746	26.3287	4.27246
	91.825	4.63973	26.3022	3.98763
	91.8	4.7018	26.3311	4.06901
	91.775	4.69579	26.4149	4.06901
	91.75	4.68032	26.4247	4.02832
	91.725	4.71598	26.1901	3.82487
	91.7	4.78111	26.3091	3.66211
	91.675	4.71257	26.4153	3.98763
	91.65	4.62656	26.5751	3.94694
	91.625	4.60275	26.8359	4.1097
	91.6	4.72053	26.9856	4.1097
	91.575	4.72797	26.8854	4.06901
	91.55	4.60037	26.5264	3.90625
	91.525	4.60791	26.3058	4.1097
	91.5	4.71276	26.3438	4.19108
	91.475	4.78014	26.3511	4.15039
	91.45	4.63396	26.2744	4.02832
	91.425	4.53041	26.4355	3.94694
	91.4	4.64075	26.3657	4.1097
	91.375	4.8041	26.3082	3.66211
	91.35	4.76326	26.442	3.78418
	91.325	4.71852	26.5949	4.15039
	91.3	4.72635	26.6764	4.06901
	91.275	4.74697	26.8972	4.02832
	91.25	4.69953	27.0054	4.1097
	91.225	4.63236	27.0613	3.86556
	91.2	4.5706	26.8693	3.94694
	91.175	4.72909	26.7371	4.19108
	91.15	4.75695	26.7447	4.23177
	91.125	4.64404	26.8653	3.78418
	91.1	4.60623	27.0057	3.66211
	91.075	4.72848	26.9801	3.90625
	91.05	4.70951	26.9958	4.19108
	91.025	4.65169	27.0115	3.94694
	91	4.61151	26.887	3.90625
	90.975	4.69141	26.7655	3.94694
	90.95	4.64081	26.6614	4.23177
	90.925	4.50811	26.584	3.90625
	90.9	4.56447	26.4969	3.7028
	90.875	4.6696	26.7023	3.86556
	90.85	4.64656	26.7295	4.27246
	90.825	4.66009	26.654	4.1097
	90.8	4.60695	26.5178	3.82487
	90.775	4.65331	26.5807	3.90625
	90.75	4.64573	26.5841	4.06901
	90.725	4.67686	26.6887	4.02832
	90.7	4.61193	26.6981	3.98763
	90.675	4.71588	26.51	4.06901
	90.65	4.71072	26.2554	4.23177
	90.625	4.62981	26.3424	3.78418
	90.6	4.63231	26.4393	3.98763
	90.575	4.77142	26.3124	4.06901
	90.55	4.77388	26.2032	3.82487
	90.525	4.60619	26.2906	3.78418
	90.5	4.49183	26.4434	3.98763
	90.475	4.60376	26.37	4.02832
	90.45	4.73711	26.4091	3.98763
	90.425	4.7371	26.3239	3.98763
	90.4	4.71993	26.3798	3.98763
	90.375	4.71245	26.5234	4.02832
	90.35	4.69982	26.5402	3.90625
	90.325	4.76253	26.6052	3.58073
	90.3	4.69972	26.7446	4.06901
	90.275	4.72021	26.7646	4.19108
	90.25	4.70821	26.548	3.86556
	90.225	4.69474	26.4039	3.86556
	90.2	4.62739	26.4007	4.02832
	90.175	4.69677	26.5344	3.98763
	90.15	4.67346	26.4455	4.35384
	90.125	4.76617	26.5166	4.1097
	90.1	4.61526	26.5442	3.82487
	90.075	4.57376	26.4887	3.82487
	90.05	4.64086	26.3715	4.1097
	90.025	4.78555	26.5106	4.15039
	90	4.75647	26.4341	4.06901
	89.975	4.68564	26.2722	3.7028
	89.95	4.66897	26.295	3.74349
	89.925	4.65538	26.1607	3.78418
	89.9	4.62558	25.9256	4.02832
	89.875	4.63525	25.8105	4.02832
	89.85	4.61857	25.7001	4.02832
	89.825	4.66825	25.7998	3.90625
	89.8	4.63919	25.803	3.94694
	89.775	4.65144	25.8483	4.19108
	89.75	4.64111	25.9386	3.86556
	89.725	4.75933	25.9948	3.86556
	89.7	4.77123	25.9536	3.78418
	89.675	4.7016	25.9794	3.74349
	89.65	4.59843	25.7547	4.02832
	89.625	4.64523	25.5694	3.90625
	89.6	4.69166	25.5147	4.06901
	89.575	4.59266	25.4338	4.02832
	89.55	4.58549	25.6334	3.78418
	89.525	4.62738	25.7673	3.78418
	89.5	4.72303	25.7367	4.06901
	89.475	4.75832	26.0196	3.94694
	89.45	4.63049	26.0092	3.7028
	89.425	4.57751	25.8735	3.78418
	89.4	4.69818	25.6998	3.62142
	89.375	4.71873	25.4747	4.06901
	89.35	4.71052	25.416	3.94694
	89.325	4.63607	25.4445	3.86556
	89.3	4.64531	25.4735	3.86556
	89.275	4.61939	25.5301	3.7028
	89.25	4.64005	25.553	4.1097
	89.225	4.68525	25.5768	3.82487
	89.2	4.70196	25.6152	3.58073
	89.175	4.58568	25.7865	3.74349
	89.15	4.57191	25.6521	4.02832
	89.125	4.60054	25.5351	3.78418
	89.1	4.65465	25.5344	3.7028
	89.075	4.59147	25.5315	4.02832
	89.05	4.65243	25.4324	4.1097
	89.025	4.68161	25.458	4.02832
	89	4.64097	25.6414	3.7028
	88.975	4.54031	25.8269	3.54004
	88.95	4.44262	25.8432	3.54004
	88.925	4.48929	25.8459	3.98763
	88.9	4.62604	25.9162	4.02832
	88.875	4.6798	25.9218	3.94694
	88.85	4.59395	25.7195	3.74349
	88.825	4.58216	25.5975	3.49935
	88.8	4.56767	25.4966	3.86556
	88.775	4.59596	25.4522	4.23177
	88.75	4.53269	25.2147	4.06901
	88.725	4.57222	24.9863	3.78418
	88.7	4.59242	24.8665	3.78418
	88.675	4.57077	24.968	3.86556
	88.65	4.51796	25.2161	3.90625
	88.625	4.45264	25.6387	3.78418
	88.6	4.47388	25.7088	3.62142
	88.575	4.63478	25.524	3.45866
	88.55	4.62416	25.4718	3.90625
	88.525	4.54677	25.491	4.1097
	88.5	4.52746	25.3549	3.82487
	88.475	4.58359	25.0709	3.86556
	88.45	4.59157	24.9518	4.06901
	88.425	4.62875	25.241	3.78418
	88.4	4.67525	25.3178	3.82487
	88.375	4.59966	25.2454	3.66211
	88.35	4.4818	25.045	3.86556
	88.325	4.46794	24.9885	4.1097
	88.3	4.56908	25.0958	4.02832
	88.275	4.59193	25.2704	3.94694
	88.25	4.4485	25.4962	3.94694
	88.225	4.41061	25.5022	3.82487
	88.2	4.5201	25.3387	3.74349
	88.175	4.60722	25.2262	3.82487
	88.15	4.57699	25.388	3.78418
	88.125	4.49702	25.6027	3.66211
	88.1	4.40424	25.743	3.86556
	88.075	4.39878	25.6697	3.90625
	88.05	4.38966	25.5913	3.78418
	88.025	4.48119	25.3081	3.58073
	88	4.61878	25.2005	3.7028
	87.975	4.45645	25.4845	4.06901
	87.95	4.25402	25.4735	3.66211
	87.925	4.27219	25.2004	3.49935
	87.9	4.35765	25.0821	3.58073
	87.875	4.39234	24.9758	3.7028
	87.85	4.45228	24.9806	3.90625
	87.825	4.46677	25.0701	3.94694
	87.8	4.43819	24.961	3.45866
	87.775	4.51408	24.9299	3.62142
	87.75	4.4066	25.0656	3.78418
	87.725	4.37895	24.9594	3.86556
	87.7	4.43128	24.5683	4.1097
	87.675	4.50622	24.5979	3.62142
	87.65	4.55316	24.8032	3.58073
	87.625	4.5058	24.8571	3.78418
	87.6	4.38929	24.805	3.62142
	87.575	4.41657	24.9067	3.66211
	87.55	4.40676	25.1183	3.74349
	87.525	4.32769	25.0235	3.78418
	87.5	4.37571	24.7514	3.82487
	87.475	4.49615	24.7659	3.78418
	87.45	4.55985	24.7507	3.78418
	87.425	4.49236	25.0072	3.49935
	87.4	4.33131	24.9945	3.7028
	87.375	4.35285	25.0779	3.94694
	87.35	4.45927	25.0473	4.02832
	87.325	4.42264	24.9746	4.02832
	87.3	4.34097	24.9274	3.98763
	87.275	4.39554	24.9027	3.66211
	87.25	4.56032	24.8095	3.62142
	87.225	4.47851	24.8479	3.66211
	87.2	4.4081	24.7575	3.78418
	87.175	4.46638	24.7892	3.74349
	87.15	4.50383	24.8334	3.86556
	87.125	4.50677	24.7944	4.02832
	87.1	4.48012	24.7851	3.94694
	87.075	4.46745	25.0039	3.90625
	87.05	4.45945	24.963	3.58073
	87.025	4.42196	24.7545	3.74349
	87	4.38286	24.7103	3.90625
	86.975	4.35813	24.6988	3.86556
	86.95	4.35736	24.6619	3.94694
	86.925	4.41709	24.6778	4.02832
	86.9	4.37076	24.4782	3.78418
	86.875	4.4312	24.5261	3.86556
	86.85	4.46243	24.5783	3.74349
	86.825	4.56035	24.5993	3.90625
	86.8	4.48671	24.623	3.90625
	86.775	4.37573	24.633	3.54004
	86.75	4.38287	24.611	3.33659
	86.725	4.50845	24.4239	3.7028
	86.7	4.35918	24.305	3.82487
	86.675	4.33068	24.4494	3.86556
	86.65	4.38232	24.539	3.94694
	86.625	4.50516	24.3504	4.1097
	86.6	4.44034	24.0859	4.15039
	86.575	4.4176	24.2269	3.90625
	86.55	4.41428	24.4947	3.78418
	86.525	4.45117	24.4512	3.86556
	86.5	4.39975	24.5625	3.7028
	86.475	4.35687	24.7174	3.86556
	86.45	4.38564	24.7162	3.62142
	86.425	4.60119	24.6894	3.74349
	86.4	4.55413	24.572	3.82487
	86.375	4.40348	24.7025	4.02832
	86.35	4.3885	24.8358	4.02832
	86.325	4.45122	24.8157	3.62142
	86.3	4.46801	24.9639	3.62142
	86.275	4.43603	24.9177	3.7028
	86.25	4.44472	24.7823	3.90625
	86.225	4.53544	24.831	3.98763
	86.2	4.47296	24.863	3.90625
	86.175	4.40856	25.0126	3.90625
	86.15	4.40705	24.9151	3.78418
	86.125	4.46023	24.8988	3.74349
	86.1	4.54558	24.8273	3.86556
	86.075	4.44841	24.5285	3.78418
	86.05	4.36081	24.3629	3.66211
	86.025	4.49292	24.3507	3.66211
	86	4.54571	24.2941	3.66211
	85.975	4.44294	24.3577	3.78418
	85.95	4.42791	24.7938	3.94694
	85.925	4.46209	25.0183	3.82487
	85.9	4.40884	24.7676	3.86556
	85.875	4.39062	24.5149	3.66211
	85.85	4.4527	24.5971	3.94694
	85.825	4.47243	24.4753	3.82487
	85.8	4.61155	24.4229	4.02832
	85.775	4.54621	24.5249	4.02832
	85.75	4.39958	24.4394	4.06901
	85.725	4.43153	24.2704	3.86556
	85.7	4.44127	24.2306	3.82487
	85.675	4.36907	24.1417	3.66211
	85.65	4.33127	23.9243	3.7028
	85.625	4.43143	24.0831	3.94694
	85.6	4.53097	24.313	3.74349
	85.575	4.47985	24.2491	3.58073
	85.55	4.34586	24.2871	3.58073
	85.525	4.35534	24.3167	3.98763
	85.5	4.43534	23.8449	4.23177
	85.475	4.47155	23.7619	3.94694
	85.45	4.32866	24.1555	3.49935
	85.425	4.26062	24.1455	3.62142
	85.4	4.37334	24.1756	3.98763
	85.375	4.41111	24.2088	3.86556
	85.35	4.42248	23.9862	3.78418
	85.325	4.42199	23.8866	3.54004
	85.3	4.51724	23.6143	3.54004
	85.275	4.45308	23.7699	3.90625
	85.25	4.27722	23.9189	4.15039
	85.225	4.36858	23.8654	3.86556
	85.2	4.46926	23.507	3.82487
	85.175	4.47823	23.3436	3.86556
	85.15	4.41144	23.5308	3.7028
	85.125	4.4028	23.6468	3.7028
	85.1	4.42918	23.6456	3.41797
	85.075	4.45096	23.6859	3.66211
	85.05	4.41294	23.8602	3.82487
	85.025	4.35486	24.0055	3.90625
	85	4.26632	24.0694	3.58073
	84.975	4.34067	24.0509	3.45866
	84.95	4.27341	24.0741	3.7028
	84.925	4.34809	24.1238	3.98763
	84.9	4.35668	24.1103	3.90625
	84.875	4.47021	24.1357	3.54004
	84.85	4.38234	24.1442	3.74349
	84.825	4.36534	24.0765	3.66211
	84.8	4.27309	23.9042	3.49935
	84.775	4.36632	23.6022	3.58073
	84.75	4.3683	23.5041	3.74349
	84.725	4.3747	23.663	3.82487
	84.7	4.25772	23.8492	3.78418
	84.675	4.399	23.9062	3.66211
	84.65	4.40188	23.9673	3.62142
	84.625	4.36472	24.1235	3.7028
	84.6	4.30656	24.0019	3.78418
	84.575	4.3803	23.9453	3.58073
	84.55	4.31846	23.6302	3.41797
	84.525	4.2718	23.5439	3.62142
	84.5	4.30001	23.571	4.06901
	84.475	4.36053	23.4833	3.94694
	84.45	4.40751	23.4318	3.66211
	84.425	4.32059	23.4485	3.45866
	84.4	4.25732	23.6162	3.62142
	84.375	4.26385	23.7055	3.82487
	84.35	4.26547	23.6808	3.7028
	84.325	4.15934	23.7508	3.62142
	84.3	4.22969	23.8148	3.74349
	84.275	4.44231	23.8714	3.74349
	84.25	4.44608	24.0952	3.7028
	84.225	4.31972	24.1716	3.62142
	84.2	4.24552	23.9715	3.25521
	84.175	4.25747	23.7862	3.62142
	84.15	4.31893	23.7328	3.78418
	84.125	4.17216	23.8983	3.41797
	84.1	4.18225	23.7727	3.41797
	84.075	4.25636	23.7161	3.7028
	84.05	4.33741	23.604	3.86556
	84.025	4.29904	23.5569	3.62142
	84	4.25819	23.5721	3.54004
	83.975	4.19373	23.6564	3.58073
	83.95	4.23144	24.0462	3.49935
	83.925	4.15554	24.1289	3.54004
	83.9	4.16228	23.9608	3.62142
	83.875	4.20887	23.8426	3.62142
	83.85	4.35187	23.714	3.62142
	83.825	4.35375	23.6468	3.90625
	83.8	4.23028	23.6315	3.49935
	83.775	4.21629	23.7709	3.62142
	83.75	4.19596	23.6661	3.62142
	83.725	4.22214	23.5339	3.66211
	83.7	4.22774	23.5297	3.66211
	83.675	4.26007	23.564	3.62142
	83.65	4.32676	23.5637	3.54004
	83.625	4.29258	23.3615	3.45866
	83.6	4.09567	23.1686	3.49935
	83.575	4.10791	23.1395	3.62142
	83.55	4.15179	23.2329	3.54004
	83.525	4.26688	23.1766	3.54004
	83.5	4.26883	23.089	3.7028
	83.475	4.19269	23.2998	3.41797
	83.45	4.19928	23.4602	3.45866
	83.425	4.207	23.3644	3.74349
	83.4	4.22845	23.5257	3.49935
	83.375	4.28368	23.5129	3.62142
	83.35	4.25221	23.2118	3.78418
	83.325	4.24673	23.0264	3.7028
	83.3	4.26643	23.0639	3.62142
	83.275	4.23908	23.2166	3.7028
	83.25	4.14164	23.2383	3.49935
	83.225	4.14076	23.3336	3.58073
	83.2	4.15642	23.2097	3.94694
	83.175	4.19207	23.0362	3.58073
	83.15	4.21064	23.081	3.66211
	83.125	4.1393	22.965	3.45866
	83.1	4.15836	22.9615	3.41797
	83.075	4.22046	23.123	3.2959
	83.05	4.2949	23.1572	3.54004
	83.025	4.26509	23.0856	3.78418
	83	4.19868	23.034	3.78418
	82.975	4.16916	23.0387	3.74349
	82.95	4.17609	22.9935	3.25521
	82.925	4.35389	23.0322	3.58073
	82.9	4.29495	23.0934	3.54004
	82.875	4.21864	23.2246	3.66211
	82.85	4.16502	23.2023	3.94694
	82.825	4.23414	23.3238	3.7028
	82.8	4.20579	23.5424	3.33659
	82.775	4.1962	23.5053	3.54004
	82.75	4.21933	23.3212	3.62142
	82.725	4.30464	23.0789	3.54004
	82.7	4.19957	22.9794	3.41797
	82.675	4.17257	23.0555	3.58073
	82.65	4.22314	23.1732	3.62142
	82.625	4.25877	23.2177	3.58073
	82.6	4.17663	23.2672	3.54004
	82.575	4.19614	23.4195	3.54004
	82.55	4.13908	23.3892	3.54004
	82.525	4.11812	23.0334	3.62142
	82.5	4.27608	22.95	3.41797
	82.475	4.13129	22.9629	3.58073
	82.45	4.07961	22.8141	3.58073
	82.425	4.19154	22.8108	3.45866
	82.4	4.22618	22.9333	3.25521
	82.375	4.18467	22.8595	3.41797
	82.35	4.14365	22.8748	3.78418
	82.325	4.13501	22.926	3.7028
	82.3	4.21158	23.0629	3.7028
	82.275	4.21448	23.0129	3.45866
	82.25	4.15422	23.0507	3.45866
	82.225	4.27784	23.1017	3.66211
	82.2	4.16878	22.9482	3.78418
	82.175	3.99062	22.8929	3.58073
	82.15	4.01632	22.8014	3.62142
	82.125	4.14838	22.6443	3.66211
	82.1	4.25193	22.8309	3.54004
	82.075	4.20175	22.9139	3.2959
	82.05	4.12957	22.714	3.37728
	82.025	4.18255	22.7599	3.62142
	82	4.27954	22.802	3.66211
	81.975	4.23615	22.702	3.66211
	81.95	4.09908	22.5508	3.21452
	81.925	4.05351	22.6744	3.25521
	81.9	4.15688	22.8408	3.49935
	81.875	4.20546	23.004	3.54004
	81.85	4.24645	23.0854	3.45866
	81.825	4.17251	23.1866	3.45866
	81.8	4.20429	23.1792	3.74349
	81.775	4.18465	22.9207	3.66211
	81.75	4.10499	22.9108	3.37728
	81.725	4.17953	23.0197	3.54004
	81.7	4.2637	23.0388	3.33659
	81.675	4.26138	22.9686	3.66211
	81.65	4.22125	23.1054	3.78418
	81.625	4.15218	23.2308	3.49935
	81.6	4.19075	23.3237	3.2959
	81.575	4.20075	23.33	3.25521
	81.55	4.07573	23.0892	3.54004
	81.525	4.08497	22.843	3.41797
	81.5	4.13732	22.6746	3.62142
	81.475	4.28195	22.7958	3.66211
	81.45	4.23084	22.8614	3.49935
	81.425	4.15193	22.8098	3.62142
	81.4	4.07854	22.8115	3.78418
	81.375	4.22185	22.7892	3.54004
	81.35	4.16911	22.673	3.25521
	81.325	4.10608	22.5962	3.41797
	81.3	4.14053	22.9923	3.62142
	81.275	4.29688	23.015	3.7028
	81.25	4.25114	22.9468	3.58073
	81.225	4.16704	22.8099	3.41797
	81.2	4.05036	22.5993	3.45866
	81.175	4.15404	22.5826	3.41797
	81.15	4.20571	22.6549	3.2959
	81.125	4.2367	22.5459	3.45866
	81.1	4.13027	22.6256	3.58073
	81.075	4.16362	22.6058	3.41797
	81.05	4.21765	22.5167	3.21452
	81.025	4.2135	22.6062	3.33659
	81	4.11249	22.5019	3.37728
	80.975	4.10164	22.467	3.17383
	80.95	4.13254	22.4713	3.41797
	80.925	4.12048	22.5244	3.7028
	80.9	4.11708	22.5681	3.82487
	80.875	4.16503	22.4472	3.54004
	80.85	4.15683	22.3845	3.33659
	80.825	4.07983	22.5637	3.37728
	80.8	4.01616	22.5054	3.49935
	80.775	4.12257	22.4043	3.01107
	80.75	4.14427	22.6412	3.09245
	80.725	4.10381	22.6119	3.37728
	80.7	4.0576	22.3541	3.86556
	80.675	4.09553	22.4268	3.86556
	80.65	4.13215	22.6006	3.62142
	80.625	4.16083	22.395	3.2959
	80.6	4.08036	22.324	3.09245
	80.575	4.11175	22.1934	3.49935
	80.55	4.16113	22.4556	3.45866
	80.525	4.13794	22.6925	3.66211
	80.5	4.22193	22.783	3.37728
	80.475	4.21101	22.7936	3.45866
	80.45	4.14013	22.6958	3.66211
	80.425	4.03972	22.7714	3.45866
	80.4	3.98004	22.7965	3.25521
	80.375	4.00045	22.6971	3.2959
	80.35	4.0766	22.4757	3.41797
	80.325	4.11005	22.4448	3.33659
	80.3	4.03211	22.5282	3.58073
	80.275	4.06211	22.2383	3.66211
	80.25	4.13619	22.0623	3.45866
	80.225	4.10553	22.175	3.66211
	80.2	4.03898	22.3617	3.66211
	80.175	3.96889	22.3687	3.21452
	80.15	4.00335	22.3218	3.09245
	80.125	4.13241	22.3297	3.33659
	80.1	4.09206	22.3777	3.58073
	80.075	4.07313	22.4002	3.49935
	80.05	4.10213	22.3576	3.2959
	80.025	4.11874	22.0364	3.33659
	80	4.03528	21.6833	3.45866
	79.975	3.98921	21.8523	3.54004
	79.95	3.94848	22.0541	3.45866
	79.925	4.03251	22.0783	3.45866
	79.9	4.0484	21.8988	3.45866
	79.875	4.00284	21.7814	3.13314
	79.85	3.97217	21.9826	3.21452
	79.825	4.15173	22.0807	3.37728
	79.8	4.04059	22.0011	3.45866
	79.775	3.96917	22.0872	3.45866
	79.75	3.82147	22.2207	3.37728
	79.725	3.97573	22.3861	3.49935
	79.7	4.01241	22.4578	3.58073
	79.675	4.01106	22.5055	3.37728
	79.65	3.97879	22.479	3.13314
	79.625	4.00662	22.4577	3.37728
	79.6	4.03894	22.3496	3.58073
	79.575	4.01497	22.2933	3.58073
	79.55	3.91327	22.2205	3.45866
	79.525	4.00828	22.3268	3.25521
	79.5	3.98829	22.1904	3.33659
	79.475	4.0152	22.0182	3.45866
	79.45	3.91812	22.1283	3.41797
	79.425	3.92553	22.1164	3.25521
	79.4	3.88047	21.9394	3.45866
	79.375	3.85222	21.7797	3.2959
	79.35	3.9222	21.8542	3.54004
	79.325	4.00886	21.7858	3.7028
	79.3	4.04654	21.8099	3.2959
	79.275	4.00352	21.9335	3.37728
	79.25	3.99526	22.0313	3.37728
	79.225	3.98593	21.9974	3.37728
	79.2	4.00697	21.7824	3.41797
	79.175	4.06877	21.7131	3.49935
	79.15	3.98213	21.6379	3.21452
	79.125	3.95318	21.5199	3.37728
	79.1	4.09773	21.4279	3.41797
	79.075	3.96073	21.6891	3.41797
	79.05	3.82873	21.6722	3.33659
	79.025	3.92413	21.5504	3.41797
	79	4.07514	21.5223	3.54004
	78.975	4.01312	21.8238	3.58073
	78.95	3.90316	21.989	3.33659
	78.925	3.87218	22.1053	3.41797
	78.9	3.95548	22.1818	3.45866
	78.875	4.0227	22.1121	3.58073
	78.85	3.95997	22.0315	3.45866
	78.825	3.9631	22.0012	3.21452
	78.8	4.06783	21.7716	3.33659
	78.775	4.06583	21.4591	3.45866
	78.75	3.92771	21.8098	3.49935
	78.725	3.9178	22.1421	3.49935
	78.7	3.99095	22.0383	2.97038
	78.675	4.01409	21.7624	2.97038
	78.65	4.00651	21.7847	3.54004
	78.625	3.95221	21.8119	3.78418
	78.6	3.96925	21.7597	3.37728
	78.575	3.98569	21.9908	3.41797
	78.55	4.00598	21.9293	3.49935
	78.525	3.97121	21.8598	3.2959
	78.5	3.90873	21.8373	3.58073
	78.475	3.99817	21.8822	3.7028
	78.45	3.98151	21.8335	3.25521
	78.425	3.86956	21.753	3.37728
	78.4	3.96133	21.8124	3.21452
	78.375	3.97708	22.0451	3.01107
	78.35	3.89903	22.1379	3.13314
	78.325	3.94703	21.9699	3.2959
	78.3	4.00865	21.5963	3.37728
	78.275	4.00755	21.3904	3.54004
	78.25	4.00896	21.6192	3.54004
	78.225	3.9495	21.6561	3.2959
	78.2	4.03222	21.4023	3.33659
	78.175	4.06306	21.6093	3.66211
	78.15	3.98254	21.8101	3.37728
	78.125	3.87389	21.9078	3.21452
	78.1	3.84804	21.9063	3.21452
	78.075	4.02999	21.8381	3.54004
	78.05	4.06179	21.7001	3.54004
	78.025	3.88475	21.6089	3.09245
	78	3.91396	21.7115	3.49935
	77.975	4.01614	21.7395	3.7028
	77.95	4.03726	21.7033	3.2959
	77.925	3.95219	21.6504	3.21452
	77.9	3.97184	21.7474	3.33659
	77.875	4.01642	21.9953	3.33659
	77.85	4.03188	22.1488	3.41797
	77.825	3.95289	22.3571	3.2959
	77.8	3.88335	22.2573	3.13314
	77.775	3.99021	22.1508	3.54004
	77.75	3.94518	22.1209	3.49935
	77.725	4.01329	22.0788	3.33659
	77.7	3.98156	21.912	3.25521
	77.675	4.08402	21.8261	3.33659
	77.65	4.10939	21.6987	3.41797
	77.625	4.05348	21.8432	3.62142
	77.6	3.89951	21.6561	3.58073
	77.575	3.91242	21.7725	2.97038
	77.55	3.95424	21.6965	3.01107
	77.525	4.04437	21.5222	3.37728
	77.5	3.9699	21.57	3.33659
	77.475	3.99709	21.685	2.97038
	77.45	4.00241	21.7587	3.05176
	77.425	4.01402	21.8703	3.62142
	77.4	3.94881	21.8774	3.25521
	77.375	3.96021	21.8234	3.37728
	77.35	3.95629	21.6808	3.62142
	77.325	3.95501	21.8091	3.49935
	77.3	4.01942	22.0836	3.58073
	77.275	4.00407	22.2203	3.37728
	77.25	3.98652	22.174	3.33659
	77.225	3.95813	22.1077	3.2959
	77.2	3.91339	22.0338	3.62142
	77.175	3.90538	21.9823	3.86556
	77.15	4.02211	21.795	3.45866
	77.125	4.0217	21.7052	3.09245
	77.1	3.97691	21.8166	3.33659
	77.075	4.00063	21.9132	3.58073
	77.05	4.09296	21.9209	3.33659
	77.025	3.99106	21.8503	3.33659
	77	3.9322	21.8641	2.92969
	76.975	3.89655	21.9726	3.21452
	76.95	4.01551	21.8442	3.33659
	76.925	3.95592	21.6493	3.41797
	76.9	3.82254	21.4095	3.45866
	76.875	3.83517	21.4298	3.58073
	76.85	3.99212	21.3571	3.41797
	76.825	3.94646	21.5852	3.41797
	76.8	3.85159	21.6914	3.09245
	76.775	3.86339	21.6415	3.21452
	76.75	3.9055	21.5121	3.2959
	76.725	3.89438	21.4785	3.05176
	76.7	3.82572	21.338	3.25521
	76.675	3.80582	21.1279	3.45866
	76.65	3.91016	20.9453	3.54004
	76.625	3.93333	21.1172	3.41797
	76.6	3.90031	21.3588	3.49935
	76.575	3.83762	21.2048	3.33659
	76.55	3.9219	21.1729	3.05176
	76.525	3.96619	21.2565	3.21452
	76.5	3.83062	21.2166	3.01107
	76.475	3.80938	21.1757	3.25521
	76.45	3.81072	21.2309	3.25521
	76.425	3.83906	21.2779	3.41797
	76.4	3.85525	21.2974	3.2959
	76.375	3.81049	21.3819	3.21452
	76.35	3.83413	21.2772	3.45866
	76.325	3.97014	21.289	3.49935
	76.3	3.88413	21.4827	3.25521
	76.275	3.8593	21.724	3.21452
	76.25	3.90178	21.5117	3.2959
	76.225	3.92207	21.4561	3.37728
	76.2	3.75756	21.5523	3.33659
	76.175	3.75721	21.5828	3.2959
	76.15	3.7545	21.6546	3.25521
	76.125	3.87721	21.7325	3.25521
	76.1	3.84485	21.4982	3.21452
	76.075	3.80981	21.2832	3.09245
	76.05	3.78437	21.3847	3.01107
	76.025	3.84429	21.6483	3.37728
	76	3.86028	21.6359	3.25521
	75.975	3.82698	21.3901	3.21452
	75.95	3.8497	21.4399	3.37728
	75.925	3.96652	21.6178	3.2959
	75.9	3.97981	21.3443	3.33659
	75.875	3.85818	21.1652	3.37728
	75.85	3.71664	21.345	3.2959
	75.825	3.83805	21.4771	3.05176
	75.8	3.82411	21.3191	3.21452
	75.775	3.75684	21.2809	3.25521
	75.75	3.73554	21.2035	3.09245
	75.725	3.81163	21.2506	3.17383
	75.7	3.82488	21.1345	3.37728
	75.675	3.78456	21.2608	3.25521
	75.65	3.75078	21.3061	2.92969
	75.625	3.78785	21.3754	3.21452
	75.6	3.73266	21.3583	3.21452
	75.575	3.70392	21.2643	3.41797
	75.55	3.72571	21.1743	3.33659
	75.525	3.87926	21.2199	3.21452
	75.5	3.91786	21.0471	3.21452
	75.475	3.78996	20.9968	3.09245
	75.45	3.63269	21.0835	3.05176
	75.425	3.67469	21.143	3.25521
	75.4	3.74019	21.2635	3.33659
	75.375	3.7518	21.3895	3.54004
	75.35	3.7299	21.3636	3.01107
	75.325	3.77154	21.2175	2.97038
	75.3	3.82789	21.076	3.05176
	75.275	3.82751	21.1995	3.25521
	75.25	3.77462	21.0708	3.05176
	75.225	3.72613	20.9125	3.05176
	75.2	3.70045	20.8457	3.05176
	75.175	3.72159	20.9406	3.25521
	75.15	3.71451	21.1166	3.17383
	75.125	3.72461	21.1742	3.17383
	75.1	3.67162	21.1974	3.33659
	75.075	3.70038	21.194	3.21452
	75.05	3.79161	21.1142	3.01107
	75.025	3.85384	20.9964	2.92969
	75	3.78756	21.0058	3.01107
	74.975	3.8085	20.9981	3.05176
	74.95	3.82737	21.0712	3.13314
	74.925	3.75083	21.0175	3.17383
	74.9	3.67816	21.1024	2.97038
	74.875	3.76853	21.1496	2.84831
	74.85	3.76245	21.1765	3.33659
	74.825	3.77011	21.2353	3.58073
	74.8	3.75538	21.117	3.58073
	74.775	3.69714	21.0632	3.37728
	74.75	3.74648	21.1842	3.13314
	74.725	3.76991	21.1485	2.92969
	74.7	3.71328	21.0177	2.80762
	74.675	3.75056	21.0167	3.21452
	74.65	3.7354	21.047	3.41797
	74.625	3.77679	20.9574	3.17383
	74.6	3.82417	20.9624	3.17383
	74.575	3.8925	21.2824	3.17383
	74.55	3.78649	21.2509	3.13314
	74.525	3.73636	20.869	3.21452
	74.5	3.73055	20.7643	3.33659
	74.475	3.81711	20.8345	3.25521
	74.45	3.74004	20.8459	3.21452
	74.425	3.72389	20.8583	3.01107
	74.4	3.78645	20.8987	3.2959
	74.375	3.85046	20.6162	3.33659
	74.35	3.86186	20.5139	3.13314
	74.325	3.81533	20.4382	3.33659
	74.3	3.76567	20.4477	3.41797
	74.275	3.77753	20.5294	3.33659
	74.25	3.78568	20.5649	3.25521
	74.225	3.82047	20.5659	3.09245
	74.2	3.7347	20.5055	3.09245
	74.175	3.75992	20.5646	3.25521
	74.15	3.83304	20.7637	3.01107
	74.125	3.83852	20.8302	3.01107
	74.1	3.84051	20.8424	3.13314
	74.075	3.79602	20.7336	3.21452
	74.05	3.82423	20.6736	3.2959
	74.025	3.7906	20.652	3.21452
	74	3.6999	20.5192	3.2959
	73.975	3.66414	20.5102	3.01107
	73.95	3.7383	20.5089	3.17383
	73.925	3.7882	20.4485	3.17383
	73.9	3.72603	20.4353	3.25521
	73.875	3.73805	20.5803	3.37728
	73.85	3.72544	20.6519	3.33659
	73.825	3.79282	20.5516	3.33659
	73.8	3.8279	20.491	3.25521
	73.775	3.77691	20.4258	3.13314
	73.75	3.73463	20.5789	3.09245
	73.725	3.76128	20.7273	3.09245
	73.7	3.70432	20.684	2.92969
	73.675	3.76831	20.3126	3.09245
	73.65	3.85553	20.1946	3.09245
	73.625	3.7817	20.2935	3.01107
	73.6	3.74822	20.2611	3.21452
	73.575	3.68357	20.2488	3.41797
	73.55	3.67277	20.2719	3.45866
	73.525	3.80401	20.2463	3.13314
	73.5	3.83845	20.0723	3.2959
	73.475	3.71411	20.0341	3.21452
	73.45	3.72274	20.2294	3.13314
	73.425	3.66719	20.3757	3.25521
	73.4	3.70866	20.3604	3.09245
	73.375	3.81677	20.3686	3.01107
	73.35	3.90787	20.4492	3.01107
	73.325	3.85254	20.3369	3.2959
	73.3	3.77893	20.0746	3.09245
	73.275	3.73145	19.8965	3.09245
	73.25	3.778	20.0958	3.45866
	73.225	3.73038	20.0891	3.54004
	73.2	3.69787	20.0444	3.13314
	73.175	3.62164	20.2417	2.92969
	73.15	3.68161	20.1997	3.05176
	73.125	3.72858	20.1646	3.05176
	73.1	3.7362	20.2909	3.13314
	73.075	3.73639	20.2802	3.21452
	73.05	3.75066	20.1366	3.13314
	73.025	3.71446	20.1532	3.09245
	73	3.70724	20.2286	2.92969
	72.975	3.65606	20.4214	2.92969
	72.95	3.67995	20.5142	2.97038
	72.925	3.73225	20.4857	3.74349
	72.9	3.60273	20.2665	3.37728
	72.875	3.62249	20.0715	3.01107
	72.85	3.71604	20.0402	3.17383
	72.825	3.8139	20.0186	3.21452
	72.8	3.77653	19.8521	3.05176
	72.775	3.67943	19.7688	3.09245
	72.75	3.63181	19.5295	3.2959
	72.725	3.77099	19.3654	3.01107
	72.7	3.84041	19.3791	2.76693
	72.675	3.80348	19.5361	2.92969
	72.65	3.67086	19.5902	3.05176
	72.625	3.62574	19.6202	3.13314
	72.6	3.70369	19.718	3.17383
	72.575	3.69988	19.7871	2.92969
	72.55	3.6638	19.9462	3.01107
	72.525	3.71795	19.952	3.09245
	72.5	3.70404	19.7066	2.80762
	72.475	3.72737	19.5263	3.05176
	72.45	3.605	19.4714	3.21452
	72.425	3.58824	19.4833	3.21452
	72.4	3.71758	19.2759	3.09245
	72.375	3.77858	19.1111	3.09245
	72.35	3.65581	19.1719	3.13314
	72.325	3.65361	19.3405	3.13314
	72.3	3.68366	19.3593	2.92969
	72.275	3.62626	19.4272	2.80762
	72.25	3.645	19.4427	3.2959
	72.225	3.75038	19.4747	3.25521
	72.2	3.66287	19.5174	3.25521
	72.175	3.61555	19.649	3.05176
	72.15	3.59568	19.7799	2.92969
	72.125	3.63944	19.7713	3.09245
	72.1	3.71592	19.9667	3.05176
	72.075	3.70378	19.8422	3.05176
	72.05	3.7074	19.7822	3.13314
	72.025	3.677	19.7312	3.25521
	72	3.73768	19.5585	3.09245
	71.975	3.64395	19.4451	2.97038
	71.95	3.58928	19.3182	3.05176
	71.925	3.54272	19.2328	3.21452
	71.9	3.6088	19.0373	3.21452
	71.875	3.65414	19.0045	3.01107
	71.85	3.58812	19.1146	3.01107
	71.825	3.50617	19.189	3.09245
	71.8	3.60706	19.2019	3.54004
	71.775	3.67189	19.3643	3.17383
	71.75	3.69395	19.5721	2.92969
	71.725	3.66084	19.5294	2.80762
	71.7	3.66454	19.4992	3.05176
	71.675	3.63194	19.5912	3.2959
	71.65	3.59534	19.4995	3.21452
	71.625	3.58086	19.4061	2.97038
	71.6	3.61978	19.4501	3.17383
	71.575	3.63519	19.3601	3.54004
	71.55	3.4558	19.4004	3.33659
	71.525	3.46452	19.4482	2.92969
	71.5	3.59434	19.7314	2.64486
	71.475	3.71035	19.8481	3.05176
	71.45	3.58711	19.6636	3.09245
	71.425	3.38407	19.6764	3.21452
	71.4	3.3727	19.7475	3.2959
	71.375	3.50036	19.7356	3.09245
	71.35	3.61449	19.5586	3.09245
	71.325	3.5966	19.642	2.97038
	71.3	3.53447	19.7701	3.21452
	71.275	3.56681	19.598	3.21452
	71.25	3.49628	19.5553	3.05176
	71.225	3.49542	19.5526	3.13314
	71.2	3.55444	19.5254	3.01107
	71.175	3.66469	19.5622	3.01107
	71.15	3.61754	19.8082	2.92969
	71.125	3.56829	19.7955	3.01107
	71.1	3.50107	19.7756	2.889
	71.075	3.63643	19.7426	3.01107
	71.05	3.58483	19.9711	3.01107
	71.025	3.55007	20.0324	3.25521
	71	3.53439	20.0663	3.21452
	70.975	3.65361	20.0819	3.01107
	70.95	3.61371	19.7892	2.97038
	70.925	3.56361	19.6438	2.80762
	70.9	3.45752	19.7606	2.72624
	70.875	3.56945	19.7735	3.01107
	70.85	3.63827	19.3393	3.13314
	70.825	3.54082	19.1896	3.13314
	70.8	3.47022	19.4274	3.17383
	70.775	3.58012	19.5334	3.33659
	70.75	3.56068	19.3848	3.05176
	70.725	3.53106	19.2647	3.13314
	70.7	3.46786	19.4373	3.09245
	70.675	3.5249	19.6905	3.05176
	70.65	3.56836	19.614	2.97038
	70.625	3.53131	19.4918	3.05176
	70.6	3.40618	19.578	2.76693
	70.575	3.50914	19.6296	3.01107
	70.55	3.52738	19.5359	3.25521
	70.525	3.49982	19.4582	3.21452
	70.5	3.47294	19.4817	3.01107
	70.475	3.52546	19.5365	3.05176
	70.45	3.5307	19.6171	3.09245
	70.425	3.559	19.5687	3.05176
	70.4	3.4666	19.5155	3.01107
	70.375	3.34846	19.5145	2.92969
	70.35	3.4247	19.4576	3.09245
	70.325	3.55161	19.306	3.05176
	70.3	3.46804	19.4441	2.889
	70.275	3.34645	19.4444	2.889
	70.25	3.44168	19.6043	3.09245
	70.225	3.47268	19.8681	3.37728
	70.2	3.44543	19.8999	3.17383
	70.175	3.48479	19.9567	2.76693
	70.15	3.58233	19.7022	2.84831
	70.125	3.57988	19.5919	3.21452
	70.1	3.46912	19.6644	3.13314
	70.075	3.40345	19.4117	3.13314
	70.05	3.45649	19.368	3.01107
	70.025	3.52889	19.2219	3.21452
	70	3.58922	19.2961	3.01107
	69.975	3.59086	19.3368	3.13314
	69.95	3.57954	19.5132	2.889
	69.925	3.53775	19.568	2.97038
	69.9	3.5505	19.6723	3.09245
	69.875	3.45327	19.6665	3.25521
	69.85	3.40513	19.5095	3.54004
	69.825	3.52243	19.3726	3.54004
	69.8	3.5348	19.5033	3.25521
	69.775	3.54257	19.6201	2.92969
	69.75	3.60884	19.6858	2.80762
	69.725	3.61718	19.7403	3.01107
	69.7	3.49351	19.7983	3.09245
	69.675	3.44379	19.7935	3.2959
	69.65	3.47572	19.901	3.17383
	69.625	3.55694	19.6744	2.92969
	69.6	3.55257	19.5405	2.72624
	69.575	3.46652	19.4056	2.92969
	69.55	3.47873	19.3036	3.05176
	69.525	3.574	19.2677	3.17383
	69.5	3.56246	19.0533	2.889
	69.475	3.51138	19.0119	2.84831
	69.45	3.42424	19.1027	3.09245
	69.425	3.48686	19.3082	3.09245
	69.4	3.54217	19.4005	3.25521
	69.375	3.52462	19.4771	3.17383
	69.35	3.52155	19.6483	3.09245
	69.325	3.63875	19.7295	3.05176
	69.3	3.64935	19.8745	2.84831
	69.275	3.44538	19.9342	3.09245
	69.25	3.38186	19.9993	3.21452
	69.225	3.57464	19.9154	3.09245
	69.2	3.64833	19.9205	3.01107
	69.175	3.59701	19.8323	3.13314
	69.15	3.58512	19.7174	2.97038
	69.125	3.51217	19.8736	3.21452
	69.1	3.52711	19.8659	3.17383
	69.075	3.46988	19.7498	3.09245
	69.05	3.41035	19.6978	3.17383
	69.025	3.46733	19.9045	3.37728
	69	3.5861	19.9361	3.25521
	68.975	3.6587	19.7965	3.13314
	68.95	3.55633	19.4701	2.97038
	68.925	3.47018	19.4121	2.889
	68.9	3.48397	19.2876	3.05176
	68.875	3.42423	19.3312	2.92969
	68.85	3.43364	19.4723	3.01107
	68.825	3.47794	19.294	3.21452
	68.8	3.50285	19.1259	3.33659
	68.775	3.48601	19.0581	3.33659
	68.75	3.3809	19.1242	3.13314
	68.725	3.40398	19.1734	2.92969
	68.7	3.47466	19.3952	2.64486
	68.675	3.60733	19.543	3.09245
	68.65	3.59093	19.5024	3.21452
	68.625	3.54869	19.2897	2.92969
	68.6	3.41545	19.3979	2.76693
	68.575	3.42851	19.6743	3.13314
	68.55	3.53612	19.6715	3.25521
	68.525	3.50502	19.5583	2.97038
	68.5	3.53156	19.3686	2.76693
	68.475	3.59115	19.1806	2.72624
	68.45	3.47567	19.1938	3.05176
	68.425	3.42673	19.1988	3.33659
	68.4	3.37612	19.2488	3.01107
	68.375	3.42365	19.2656	3.05176
	68.35	3.37927	19.0874	3.13314
	68.325	3.33678	18.9892	3.09245
	68.3	3.40859	19.014	2.97038
	68.275	3.47229	19.1793	2.80762
	68.25	3.43357	19.0737	2.84831
	68.225	3.40396	19.0582	3.09245
	68.2	3.47698	18.9825	3.13314
	68.175	3.41864	18.9402	2.889
	68.15	3.37665	18.9927	2.84831
	68.125	3.32026	19.1025	2.80762
	68.1	3.44919	18.9169	3.05176
	68.075	3.54198	18.952	3.01107
	68.05	3.54569	19.0142	3.01107
	68.025	3.39334	19.151	3.13314
	68	3.48265	19.2581	3.25521
	67.975	3.45163	19.2863	3.05176
	67.95	3.48103	19.0796	2.97038
	67.925	3.39123	18.953	2.92969
	67.9	3.33185	18.874	2.97038
	67.875	3.39591	18.85	3.13314
	67.85	3.40159	19.0104	3.13314
	67.825	3.3855	19.1878	3.05176
	67.8	3.38922	19.0884	2.56348
	67.775	3.44176	19.0084	2.80762
	67.75	3.39912	19.0406	2.92969
	67.725	3.36947	19.1186	2.80762
	67.7	3.35386	19.1756	2.76693
	67.675	3.37757	19.1533	2.97038
	67.65	3.35109	19.099	2.92969
	67.625	3.36238	19.2248	3.21452
	67.6	3.41266	19.2289	3.21452
	67.575	3.53625	19.4363	2.889
	67.55	3.47422	19.6026	2.84831
	67.525	3.26926	19.5075	2.92969
	67.5	3.30469	19.4651	3.25521
	67.475	3.4655	19.5146	3.01107
	67.45	3.38073	19.4735	2.76693
	67.425	3.37809	19.4801	2.92969
	67.4	3.32056	19.3651	3.05176
	67.375	3.33356	19.2219	3.05176
	67.35	3.2692	19.2987	2.68555
	67.325	3.31321	19.3945	2.92969
	67.3	3.33687	19.3565	2.97038
	67.275	3.32379	19.22	2.60417
	67.25	3.21183	19.1237	2.72624
	67.225	3.19584	19.1965	2.76693
	67.2	3.2678	19.3433	3.05176
	67.175	3.42392	19.2443	3.21452
	67.15	3.42349	19.2059	2.92969
	67.125	3.24101	19.2631	2.52279
	67.1	3.13418	19.1872	2.97038
	67.075	3.278	19.2469	2.92969
	67.05	3.41576	19.2889	3.01107
	67.025	3.41196	19.4156	2.92969
	67	3.31788	19.4876	3.05176
	66.975	3.3101	19.52	2.84831
	66.95	3.37147	19.5377	2.64486
	66.925	3.32486	19.4592	2.72624
	66.9	3.26705	19.4117	3.13314
	66.875	3.23479	19.345	2.97038
	66.85	3.24563	19.3044	2.60417
	66.825	3.32352	19.3023	2.72624
	66.8	3.24954	19.1298	2.889
	66.775	3.24612	18.9514	2.889
	66.75	3.31915	19.0004	2.80762
	66.725	3.39397	19.1067	2.889
	66.7	3.35776	18.898	2.92969
	66.675	3.28743	18.6175	2.72624
	66.65	3.32161	18.7182	2.76693
	66.625	3.26206	18.8682	2.76693
	66.6	3.22	18.8208	2.889
	66.575	3.1945	18.6221	2.72624
	66.55	3.22778	18.5947	3.05176
	66.525	3.33174	18.6485	3.01107
	66.5	3.33487	18.5516	2.68555
	66.475	3.34127	18.5171	2.64486
	66.45	3.24699	18.4775	2.76693
	66.425	3.28325	18.3985	2.80762
	66.4	3.23057	18.4493	2.92969
	66.375	3.2408	18.654	2.97038
	66.35	3.17619	18.7573	3.01107
	66.325	3.25403	18.8849	2.889
	66.3	3.24	18.982	2.76693
	66.275	3.24862	18.891	2.92969
	66.25	3.28405	18.8262	2.76693
	66.225	3.3948	18.852	2.80762
	66.2	3.37352	18.9171	2.92969
	66.175	3.30943	18.8387	3.05176
	66.15	3.21182	18.7212	2.76693
	66.125	3.20948	18.6049	2.72624
	66.1	3.27971	18.68	2.92969
	66.075	3.30219	18.5815	3.05176
	66.05	3.23422	18.7338	2.97038
	66.025	3.29955	18.6591	2.64486
	66	3.26174	18.5333	3.01107
	65.975	3.24651	18.7189	3.09245
	65.95	3.22528	18.6759	2.97038
	65.925	3.22966	18.4879	3.09245
	65.9	3.29022	18.4509	3.01107
	65.875	3.2643	18.641	3.13314
	65.85	3.23698	18.4789	3.05176
	65.825	3.30278	18.3488	3.05176
	65.8	3.33948	18.5548	3.05176
	65.775	3.29673	18.7389	3.01107
	65.75	3.28687	18.6438	2.97038
	65.725	3.35876	18.4856	2.97038
	65.7	3.33583	18.4718	2.92969
	65.675	3.28331	18.2127	2.92969
	65.65	3.19772	17.9539	3.05176
	65.625	3.25934	18.0346	3.01107
	65.6	3.40553	18.1821	2.92969
	65.575	3.32649	18.2442	2.889
	65.55	3.15121	18.1476	2.97038
	65.525	3.19411	18.096	2.97038
	65.5	3.28327	18.2313	3.13314
	65.475	3.27648	18.1725	3.09245
	65.45	3.23069	17.9261	2.76693
	65.425	3.24974	18.0239	2.97038
	65.4	3.29887	18.1884	2.84831
	65.375	3.36096	18.1464	2.889
	65.35	3.32779	18.1223	2.92969
	65.325	3.29698	18.4828	3.13314
	65.3	3.36097	18.7139	3.05176
	65.275	3.34915	18.8424	2.80762
	65.25	3.32959	18.7713	2.84831
	65.225	3.3168	18.6657	3.21452
	65.2	3.27886	18.5423	3.21452
	65.175	3.39058	18.5682	2.97038
	65.15	3.40122	18.4716	2.889
	65.125	3.28344	18.5019	3.09245
	65.1	3.20576	18.7657	3.41797
	65.075	3.20832	18.8037	2.97038
	65.05	3.28373	18.6984	2.889
	65.025	3.30402	18.437	3.05176
	65	3.35318	18.3282	3.01107
	64.975	3.33856	18.4881	3.01107
	64.95	3.25312	18.4972	3.09245
	64.925	3.27578	18.3032	2.889
	64.9	3.28933	18.2339	2.68555
	64.875	3.29844	18.1825	2.80762
	64.85	3.15436	18.3253	3.13314
	64.825	3.23473	18.4319	3.01107
	64.8	3.29005	18.3399	2.97038
	64.775	3.39061	18.1131	2.64486
	64.75	3.35848	18.2063	2.97038
	64.725	3.26266	18.2199	3.05176
	64.7	3.21436	18.0362	2.84831
	64.675	3.26006	17.9845	2.80762
	64.65	3.33764	18.0548	2.889
	64.625	3.295	18.1107	2.97038
	64.6	3.17315	18.0356	2.76693
	64.575	3.20743	18.0217	2.76693
	64.55	3.27234	17.9736	2.68555
	64.525	3.27535	17.8028	2.92969
	64.5	3.25974	17.8369	3.05176
	64.475	3.32702	17.9579	3.01107
	64.45	3.36479	18.0211	2.64486
	64.425	3.19776	17.993	2.889
	64.4	3.09491	18.0664	2.97038
	64.375	3.18821	18.2049	3.01107
	64.35	3.30201	18.1662	2.84831
	64.325	3.28373	17.9211	2.60417
	64.3	3.18394	17.9125	2.64486
	64.275	3.16726	17.9543	2.68555
	64.25	3.28207	17.8865	2.889
	64.225	3.21048	17.9429	2.84831
	64.2	3.27096	18.1878	2.72624
	64.175	3.22795	18.083	2.889
	64.15	3.21585	18.0937	2.68555
	64.125	3.24149	17.9459	2.889
	64.1	3.22985	17.7836	2.31934
	64.075	3.16407	17.8571	2.56348
	64.05	3.21312	17.9872	2.97038
	64.025	3.21643	17.8361	2.80762
	64	3.12742	17.7683	2.56348
	63.975	3.09812	17.8488	2.52279
	63.95	3.20833	17.8502	2.68555
	63.925	3.28793	17.9161	2.76693
	63.9	3.23441	18.0462	3.01107
	63.875	3.13551	18.0625	2.80762
	63.85	3.14064	17.8937	2.84831
	63.825	3.2272	17.9225	2.80762
	63.8	3.27174	17.9043	2.889
	63.775	3.16723	17.8295	2.60417
	63.75	3.12739	17.9827	2.92969
	63.725	3.21063	18.0421	2.80762
	63.7	3.13688	17.8327	2.64486
	63.675	3.1643	17.6932	2.60417
	63.65	3.19291	17.756	2.80762
	63.625	3.23122	17.6024	2.80762
	63.6	3.23119	17.452	2.92969
	63.575	3.20066	17.4574	2.97038
	63.55	3.1192	17.5907	2.72624
	63.525	3.17938	17.5627	2.68555
	63.5	3.17314	17.3974	2.27865
	63.475	3.20635	17.3145	2.72624
	63.45	3.2191	17.2551	2.80762
	63.425	3.22918	17.1544	2.72624
	63.4	3.13914	17.1297	2.889
	63.375	3.03915	17.251	2.72624
	63.35	3.04159	17.3373	2.84831
	63.325	3.1419	17.4693	2.56348
	63.3	3.14978	17.6131	2.4821
	63.275	3.06848	17.66	2.72624
	63.25	3.02642	17.6599	2.84831
	63.225	3.09265	17.5565	2.76693
	63.2	3.129	17.4225	2.56348
	63.175	3.08532	17.4434	2.60417
	63.15	3.18151	17.4452	2.60417
	63.125	3.14595	17.4361	2.56348
	63.1	3.04736	17.6481	2.56348
	63.075	2.97231	17.7297	2.68555
	63.05	3.03495	17.5706	2.889
	63.025	3.16314	17.523	2.92969
	63	3.17837	17.4778	2.72624
	62.975	3.07279	17.4969	2.56348
	62.95	3.03667	17.418	2.76693
	62.925	3.06212	17.5412	2.92969
	62.9	3.05611	17.6034	2.40072
	62.875	3.02592	17.6377	2.36003
	62.85	3.08362	17.7127	2.92969
	62.825	3.13387	17.4721	2.92969
	62.8	3.17359	17.342	2.64486
	62.775	3.10188	17.3919	2.52279
	62.75	3.05652	17.3981	2.31934
	62.725	3.05579	17.3702	2.80762
	62.7	3.00996	17.4123	2.68555
	62.675	2.98917	17.5123	2.56348
	62.65	3.12723	17.4741	2.4821
	62.625	3.16787	17.3199	2.60417
	62.6	3.1415	17.2865	2.60417
	62.575	3.07651	17.1479	2.80762
	62.55	3.12507	17.1463	2.76693
	62.525	3.12995	17.2065	2.36003
	62.5	3.03108	17.235	2.23796
	62.475	3.0986	17.2526	2.76693
	62.45	3.03063	17.1225	3.01107
	62.425	3.08419	17.2982	2.76693
	62.4	3.05957	17.4428	3.05176
	62.375	3.05417	17.3374	2.64486
	62.35	3.10766	17.2777	2.60417
	62.325	3.17727	17.3317	2.72624
	62.3	3.12394	17.2907	2.80762
	62.275	2.9603	17.158	2.68555
	62.25	2.99697	17.1909	2.76693
	62.225	3.14002	17.2388	2.68555
	62.2	3.1842	17.218	2.27865
	62.175	3.11349	17.2753	2.4821
	62.15	3.05669	17.221	2.68555
	62.125	3.07853	17.0674	2.72624
	62.1	3.15581	17.0438	2.68555
	62.075	3.09583	17.0446	2.889
	62.05	3.03203	17.0323	3.01107
	62.025	3.07095	17.2406	2.72624
	62	3.13082	17.4335	2.64486
	61.975	3.13268	17.4462	2.97038
	61.95	3.06721	17.3487	2.92969
	61.925	3.09147	17.2004	2.76693
	61.9	3.08634	17.1287	2.92969
	61.875	3.05445	17.1291	2.76693
	61.85	3.04359	17.0535	2.72624
	61.825	3.12435	17.1229	2.72624
	61.8	3.11355	17.1732	2.68555
	61.775	3.077	17.1047	2.84831
	61.75	2.94853	17.023	2.56348
	61.725	3.01266	17.1034	2.60417
	61.7	3.13406	17.0107	2.92969
	61.675	3.1844	17.067	2.68555
	61.65	3.14637	17.2357	2.52279
	61.625	3.125	17.2822	2.80762
	61.6	3.12193	17.3144	2.97038
	61.575	3.08063	17.3987	2.76693
	61.55	3.06209	17.5313	2.68555
	61.525	3.03451	17.5406	2.60417
	61.5	3.01616	17.3491	2.80762
	61.475	3.07052	17.4111	2.68555
	61.45	3.03626	17.3901	2.72624
	61.425	2.98613	17.27	2.80762
	61.4	3.00718	17.1931	2.72624
	61.375	3.03415	17.2891	3.13314
	61.35	2.94627	17.346	2.97038
	61.325	2.95601	17.2676	2.76693
	61.3	3.05636	17.0698	2.72624
	61.275	3.19247	17.1119	2.76693
	61.25	3.08392	17.3121	2.68555
	61.225	2.98134	17.4388	2.56348
	61.2	2.98869	17.2162	2.40072
	61.175	3.1845	17.1112	2.64486
	61.15	3.12478	17.2469	2.76693
	61.125	3.08623	17.2749	2.80762
	61.1	3.01718	17.2074	2.68555
	61.075	3.09601	17.2131	2.68555
	61.05	3.11519	17.1546	2.80762
	61.025	3.03545	17.2125	2.97038
	61	3.13825	17.2015	2.97038
	60.975	3.2443	17.0616	2.64486
	60.95	3.09741	17.1159	2.23796
	60.925	2.96711	17.1005	2.68555
	60.9	3.00695	16.9992	2.80762
	60.875	3.14019	16.8289	2.56348
	60.85	3.13971	16.6542	2.52279
	60.825	3.11047	16.7183	2.80762
	60.8	3.11032	16.6359	2.92969
	60.775	3.09491	16.5969	2.72624
	60.75	3.11305	16.6826	2.64486
	60.725	3.03491	16.6678	2.60417
	60.7	2.99354	16.7386	2.60417
	60.675	3.07069	16.8851	2.76693
	60.65	3.16059	17.0353	2.68555
	60.625	3.16864	16.9124	2.72624
	60.6	3.06982	16.7996	2.84831
	60.575	3.09495	16.9374	2.80762
	60.55	3.1807	17.0084	2.92969
	60.525	3.06137	17.0173	2.68555
	60.5	2.9776	16.9023	2.31934
	60.475	3.04534	16.9361	2.56348
	60.45	3.07085	16.9517	2.97038
	60.425	3.07954	16.9423	2.889
	60.4	3.1116	17.1656	2.60417
	60.375	3.18768	17.4076	2.64486
	60.35	3.10856	17.4421	2.68555
	60.325	3.04627	17.1158	2.68555
	60.3	2.99792	16.9674	2.40072
	60.275	3.02525	17.0878	2.19727
	60.25	2.95855	17.0245	2.60417
	60.225	3.00047	17.0141	2.64486
	60.2	3.07572	17.0045	2.60417
	60.175	3.08993	17.0222	2.56348
	60.15	3.02203	17.0836	2.52279
	60.125	3.06143	17.0405	2.68555
	60.1	2.95833	16.8508	2.64486
	60.075	2.93825	16.7259	2.76693
	60.05	3.02791	16.7659	2.60417
	60.025	3.04895	16.9647	2.76693
	60	2.96728	16.9858	2.72624
	59.975	3.05931	16.8972	2.60417
	59.95	3.02226	16.7623	2.40072
	59.925	3.04544	16.6267	2.40072
	59.9	2.96778	16.6022	2.72624
	59.875	3.00303	16.6731	2.72624
	59.85	3.00853	16.6383	2.76693
	59.825	3.00299	16.5023	2.64486
	59.8	2.92226	16.5802	2.80762
	59.775	2.96863	16.5235	2.60417
	59.75	2.92487	16.4675	2.40072
	59.725	3.01253	16.3902	2.60417
	59.7	3.01615	16.2748	2.36003
	59.675	3.06015	16.3608	2.80762
	59.65	3.02171	16.4422	2.40072
	59.625	3.04552	16.5395	2.31934
	59.6	3.03693	16.3673	2.68555
	59.575	3.01593	16.1867	2.92969
	59.55	2.94371	16.1831	2.80762
	59.525	2.94313	16.4368	2.68555
	59.5	2.9541	16.5933	2.4821
	59.475	2.93918	16.5328	2.31934
	59.45	2.94758	16.4554	2.68555
	59.425	2.963	16.4824	2.64486
	59.4	2.93098	16.3986	2.52279
	59.375	2.95819	16.4016	2.27865
	59.35	2.96656	16.487	2.68555
	59.325	2.8995	16.5512	2.64486
	59.3	2.99451	16.2456	2.60417
	59.275	3.06745	16.1957	2.68555
	59.25	3.00849	16.4068	2.68555
	59.225	2.94337	16.4184	2.97038
	59.2	3.14023	16.3091	2.36003
	59.175	2.964	16.2481	2.31934
	59.15	2.83009	16.3635	2.60417
	59.125	2.86402	16.3397	2.889
	59.1	2.90151	16.4021	2.76693
	59.075	2.82641	16.4591	2.68555
	59.05	2.86459	16.4147	2.72624
	59.025	2.85755	16.484	2.27865
	59	2.9533	16.6146	2.31934
	58.975	2.98874	16.4451	2.4821
	58.95	2.9176	16.3946	2.68555
	58.925	2.82959	16.5567	2.56348
	58.9	2.84832	16.4991	2.56348
	58.875	2.90158	16.2169	2.4821
	58.85	2.85403	16.1207	2.60417
	58.825	2.80779	16.2006	2.52279
	58.8	2.75068	16.2102	2.19727
	58.775	2.81819	16.1689	2.40072
	58.75	2.7948	16.3178	2.68555
	58.725	2.75476	16.5961	2.84831
	58.7	2.84413	16.4509	2.60417
	58.675	2.89284	16.3379	2.52279
	58.65	2.88578	16.5975	2.40072
	58.625	2.87775	16.5952	2.36003
	58.6	2.83004	16.5331	2.60417
	58.575	2.85724	16.4197	2.60417
	58.55	2.86105	16.5182	2.36003
	58.525	2.78652	16.4765	2.60417
	58.5	2.81337	16.4489	2.68555
	58.475	2.89609	16.3779	2.40072
	58.45	2.83205	16.2593	2.27865
	58.425	2.77509	16.4195	2.4821
	58.4	2.76459	16.3824	2.4821
	58.375	2.91705	16.3753	2.36003
	58.35	2.90162	16.4393	2.40072
	58.325	2.84598	16.4962	2.56348
	58.3	2.88506	16.478	2.36003
	58.275	2.97498	16.5078	2.52279
	58.25	2.84758	16.5005	2.4821
	58.225	2.77076	16.5566	2.68555
	58.2	2.81379	16.4833	2.80762
	58.175	2.89032	16.4729	2.72624
	58.15	2.84172	16.503	2.60417
	58.125	2.71994	16.4579	2.84831
	58.1	2.74934	16.3542	2.56348
	58.075	2.82072	16.2838	2.19727
	58.05	2.86217	16.2598	2.64486
	58.025	2.81029	16.2985	2.31934
	58	2.78514	16.3239	2.56348
	57.975	2.85712	16.2035	2.72624
	57.95	2.8652	16.1793	2.27865
	57.925	2.91635	16.2779	2.23796
	57.9	2.88501	16.2734	2.64486
	57.875	2.75443	16.3262	2.64486
	57.85	2.73159	16.2297	2.56348
	57.825	2.75668	16.0757	2.52279
	57.8	2.76986	16.1017	2.31934
	57.775	2.78642	16.1854	2.60417
	57.75	2.84421	16.2507	2.64486
	57.725	2.81077	16.1235	2.72624
	57.7	2.79289	16.0299	2.68555
	57.675	2.74003	15.8737	2.4821
	57.65	2.78718	15.6696	2.52279
	57.625	2.75984	15.8223	2.60417
	57.6	2.78852	15.8735	2.68555
	57.575	2.79551	15.872	2.36003
	57.55	2.76788	15.9803	2.60417
	57.525	2.76131	16.0114	2.92969
	57.5	2.86794	16.0244	2.60417
	57.475	2.91877	15.8232	2.4821
	57.45	2.88368	15.7525	2.19727
	57.425	2.78159	15.8393	2.64486
	57.4	2.72035	15.8338	2.889
	57.375	2.82445	15.868	2.56348
	57.35	2.79558	15.8208	2.40072
	57.325	2.73052	15.8615	2.68555
	57.3	2.7754	16.0033	2.64486
	57.275	2.91967	15.9186	2.60417
	57.25	3.01987	15.7326	2.40072
	57.225	2.95316	15.857	2.4821
	57.2	2.82253	15.9904	2.72624
	57.175	2.75996	15.9828	2.84831
	57.15	2.81599	15.8627	2.52279
	57.125	2.83371	15.8411	2.11589
	57.1	2.79066	15.7909	2.64486
	57.075	2.76009	15.7372	2.64486
	57.05	2.85647	15.7637	2.36003
	57.025	2.90991	15.8554	2.27865
	57	2.90858	15.8574	2.889
	56.975	2.85661	15.814	3.01107
	56.95	2.93302	15.7219	2.68555
	56.925	2.93793	15.7696	2.68555
	56.9	2.80667	15.845	2.64486
	56.875	2.76579	15.8808	2.19727
	56.85	2.86363	15.7962	2.40072
	56.825	2.92275	15.6156	2.68555
	56.8	2.78712	15.5887	2.40072
	56.775	2.81295	15.5506	2.56348
	56.75	2.85088	15.6334	2.76693
	56.725	2.84658	15.799	2.72624
	56.7	2.76502	15.7195	2.64486
	56.675	2.85079	15.5547	2.31934
	56.65	2.91429	15.4253	2.52279
	56.625	2.95759	15.5831	2.56348
	56.6	2.88389	15.8908	2.52279
	56.575	2.83289	16.0099	2.31934
	56.55	2.77899	15.8755	2.23796
	56.525	2.79816	15.7865	2.60417
	56.5	2.90531	15.8933	2.68555
	56.475	2.85905	15.9736	2.31934
	56.45	2.94604	16.0023	2.11589
	56.425	2.86404	15.9875	2.4821
	56.4	2.72469	15.8302	2.60417
	56.375	2.81501	15.7029	2.60417
	56.35	2.85271	15.8233	2.60417
	56.325	2.90106	15.9713	2.64486
	56.3	2.77998	15.8339	2.31934
	56.275	2.7213	15.8195	2.27865
	56.25	2.73955	15.8768	2.40072
	56.225	2.90821	15.8518	2.52279
	56.2	2.79404	15.6921	2.4821
	56.175	2.82631	15.7875	2.52279
	56.15	2.89711	15.8528	2.52279
	56.125	2.98238	15.6272	2.56348
	56.1	2.76448	15.5957	2.80762
	56.075	2.65265	15.6732	2.68555
	56.05	2.77924	15.5739	2.23796
	56.025	2.93001	15.3293	2.52279
	56	2.82023	15.5201	2.23796
	55.975	2.70961	15.6277	2.31934
	55.95	2.74239	15.5269	2.52279
	55.925	2.83088	15.5484	2.72624
	55.9	2.7785	15.6344	2.64486
	55.875	2.76035	15.6359	2.31934
	55.85	2.68121	15.5964	2.36003
	55.825	2.75649	15.6482	2.72624
	55.8	2.85301	15.6761	2.36003
	55.775	2.73818	15.6642	2.36003
	55.75	2.77938	15.5599	2.23796
	55.725	2.75072	15.4404	2.40072
	55.7	2.81236	15.2955	2.68555
	55.675	2.81711	15.3629	2.23796
	55.65	2.7221	15.6068	2.0345
	55.625	2.7185	15.6053	2.23796
	55.6	2.75976	15.5186	2.4821
	55.575	2.75419	15.4266	2.40072
	55.55	2.71531	15.3661	2.4821
	55.525	2.73064	15.1108	2.56348
	55.5	2.79543	15.1731	2.36003
	55.475	2.69315	15.0729	2.19727
	55.45	2.61649	14.9964	2.11589
	55.425	2.72484	15.0753	2.60417
	55.4	2.8495	15.2286	2.60417
	55.375	2.72893	15.1383	2.52279
	55.35	2.6302	15.0426	2.27865
	55.325	2.65307	15.2275	1.91244
	55.3	2.73102	15.0792	2.19727
	55.275	2.71519	14.9702	2.68555
	55.25	2.7173	15.0578	2.4821
	55.225	2.6693	15.029	2.31934
	55.2	2.72043	15.0793	2.68555
	55.175	2.69958	15.122	2.27865
	55.15	2.72695	14.9588	2.36003
	55.125	2.7669	14.684	2.36003
	55.1	2.82726	14.9452	2.36003
	55.075	2.82538	15.1714	2.56348
	55.05	2.74577	15.2	2.56348
	55.025	2.67558	15.1056	2.40072
	55	2.7	15.076	2.56348
	54.975	2.76439	15.127	2.60417
	54.95	2.74784	15.1248	2.07519
	54.925	2.6488	14.9751	2.36003
	54.9	2.63039	15.0067	2.4821
	54.875	2.68802	15.2457	2.64486
	54.85	2.54406	15.2735	2.40072
	54.825	2.5485	15.2879	2.31934
	54.8	2.6353	15.2663	2.36003
	54.775	2.6895	15.3427	2.31934
	54.75	2.61891	15.3632	2.52279
	54.725	2.53829	15.3284	2.36003
	54.7	2.58545	15.3461	2.19727
	54.675	2.67904	15.3841	2.36003
	54.65	2.70188	15.4327	2.56348
	54.625	2.66144	15.4703	2.40072
	54.6	2.56706	15.5993	2.31934
	54.575	2.61897	15.6114	2.11589
	54.55	2.63755	15.4952	2.23796
	54.525	2.61453	15.2683	2.31934
	54.5	2.58579	15.3281	2.56348
	54.475	2.73434	15.3713	2.60417
	54.45	2.73831	15.3623	2.56348
	54.425	2.71159	15.3785	2.23796
	54.4	2.65911	15.3794	2.11589
	54.375	2.6628	15.4556	2.15658
	54.35	2.61618	15.3455	2.36003
	54.325	2.63548	15.2758	2.36003
	54.3	2.66784	15.3531	2.0345
	54.275	2.66235	15.4211	2.23796
	54.25	2.6925	15.3917	2.23796
	54.225	2.68506	15.4631	2.27865
	54.2	2.64217	15.449	2.27865
	54.175	2.66	15.317	2.64486
	54.15	2.66791	15.4052	2.40072
	54.125	2.63958	15.2819	2.07519
	54.1	2.68043	15.2013	2.36003
	54.075	2.65061	15.3244	2.40072
	54.05	2.59878	15.5248	2.36003
	54.025	2.63083	15.4005	2.07519
	54	2.72194	15.3544	2.11589
	53.975	2.65536	15.3347	2.19727
	53.95	2.62419	15.2471	2.15658
	53.925	2.61445	15.2084	2.27865
	53.9	2.64155	15.1322	2.60417
	53.875	2.62303	15.2083	2.52279
	53.85	2.66159	15.3566	2.15658
	53.825	2.63339	15.2902	2.36003
	53.8	2.62283	15.2511	2.40072
	53.775	2.75106	15.2478	2.4821
	53.75	2.77177	15.1841	2.31934
	53.725	2.63394	15.2304	2.4821
	53.7	2.56796	15.2419	2.27865
	53.675	2.58081	15.2243	2.64486
	53.65	2.64824	15.0984	2.60417
	53.625	2.63806	15.166	2.31934
	53.6	2.61025	15.2428	2.19727
	53.575	2.689	15.2176	2.40072
	53.55	2.73276	15.2257	2.72624
	53.525	2.73412	15.1725	2.23796
	53.5	2.59768	15.2023	2.19727
	53.475	2.56375	15.0592	2.56348
	53.45	2.65798	15.0251	2.40072
	53.425	2.59327	15.0889	2.64486
	53.4	2.61784	15.0316	2.4821
	53.375	2.60762	15.0052	2.0345
	53.35	2.59596	15.1318	2.0345
	53.325	2.69508	15.078	2.4821
	53.3	2.65069	15.0051	2.23796
	53.275	2.55112	14.9304	2.23796
	53.25	2.55173	14.9286	2.60417
	53.225	2.63512	15.0745	2.60417
	53.2	2.59409	14.9858	2.27865
	53.175	2.64178	15.0452	2.4821
	53.15	2.69658	15.0524	2.40072
	53.125	2.6196	15.0843	2.19727
	53.1	2.57905	15.1542	2.27865
	53.075	2.62426	15.0778	2.23796
	53.05	2.64179	15.1695	2.40072
	53.025	2.55397	15.3106	2.0345
	53	2.53245	15.2145	2.31934
	52.975	2.53416	14.9768	2.52279
	52.95	2.6286	14.9431	2.56348
	52.925	2.74092	15.0151	2.36003
	52.9	2.69752	15.0646	2.15658
	52.875	2.65066	15.0598	2.56348
	52.85	2.7017	14.9838	2.31934
	52.825	2.62484	15.0419	2.19727
	52.8	2.56757	14.9891	2.27865
	52.775	2.56784	14.9206	2.40072
	52.75	2.60259	14.8945	2.52279
	52.725	2.69644	14.8178	2.68555
	52.7	2.71316	14.7482	2.56348
	52.675	2.72606	14.7048	2.19727
	52.65	2.76687	14.7174	2.0345
	52.625	2.70293	14.7962	2.19727
	52.6	2.65017	14.7457	2.36003
	52.575	2.55136	14.7911	2.11589
	52.55	2.61411	14.8918	2.4821
	52.525	2.78469	14.8041	2.52279
	52.5	2.72035	14.6729	2.23796
	52.475	2.61461	14.6565	2.19727
	52.45	2.6407	14.9209	2.40072
	52.425	2.63859	15.0529	2.40072
	52.4	2.56511	14.9987	2.23796
	52.375	2.43246	15.1358	2.15658
	52.35	2.59271	15.0831	2.31934
	52.325	2.67669	14.9875	2.56348
	52.3	2.58184	14.8545	2.31934
	52.275	2.64133	14.7955	2.27865
	52.25	2.58513	14.8754	2.31934
	52.225	2.62514	14.7632	2.31934
	52.2	2.63129	14.7936	2.36003
	52.175	2.68307	14.7725	2.23796
	52.15	2.62814	14.594	1.95312
	52.125	2.53982	14.4086	2.19727
	52.1	2.59851	14.4327	2.76693
	52.075	2.60969	14.4204	2.52279
	52.05	2.56033	14.4822	2.40072
	52.025	2.51362	14.6008	2.4821
	52	2.60995	14.7404	2.27865
	51.975	2.63616	14.8332	2.23796
	51.95	2.66508	14.6843	2.23796
	51.925	2.59891	14.5317	2.27865
	51.9	2.61405	14.4975	2.64486
	51.875	2.72564	14.639	2.4821
	51.85	2.70811	14.7888	2.0345
	51.825	2.60508	14.703	2.19727
	51.8	2.57273	14.5364	2.40072
	51.775	2.56012	14.4899	2.36003
	51.75	2.54277	14.5997	2.4821
	51.725	2.60124	14.6937	2.40072
	51.7	2.59134	14.6211	2.0345
	51.675	2.59287	14.5944	2.07519
	51.65	2.63535	14.5613	2.40072
	51.625	2.60464	14.603	2.64486
	51.6	2.64499	14.5014	2.27865
	51.575	2.67708	14.3592	1.95312
	51.55	2.62585	14.4309	1.99381
	51.525	2.50687	14.4273	2.11589
	51.5	2.43454	14.3589	2.19727
	51.475	2.56644	14.2203	2.64486
	51.45	2.51875	14.2782	2.52279
	51.425	2.47166	14.2157	2.27865
	51.4	2.53661	14.2119	2.19727
	51.375	2.59158	14.2538	2.27865
	51.35	2.60375	14.1922	2.15658
	51.325	2.59259	14.2455	2.0345
	51.3	2.52207	14.2904	2.31934
	51.275	2.49551	14.1236	2.31934
	51.25	2.54573	14.1668	2.36003
	51.225	2.58131	14.3255	2.15658
	51.2	2.48261	14.305	2.23796
	51.175	2.58231	14.0866	2.36003
	51.15	2.58958	14.0397	2.4821
	51.125	2.51247	14.1884	2.15658
	51.1	2.43656	14.3047	1.87174
	51.075	2.56091	14.4443	1.95312
	51.05	2.52266	14.5455	2.27865
	51.025	2.49325	14.4868	2.36003
	51	2.43024	14.2739	2.27865
	50.975	2.56127	14.2849	2.0345
	50.95	2.6248	14.3359	2.27865
	50.925	2.60815	14.2266	2.27865
	50.9	2.53442	14.2233	1.87174
	50.875	2.46037	14.3601	2.0345
	50.85	2.33576	14.2332	2.40072
	50.825	2.49598	14.2892	2.56348
	50.8	2.47215	14.3957	2.56348
	50.775	2.5266	14.3379	2.15658
	50.75	2.55883	14.1473	2.07519
	50.725	2.47158	14.0878	2.4821
	50.7	2.39947	14.1514	2.27865
	50.675	2.46824	14.2614	2.19727
	50.65	2.62456	14.2465	2.11589
	50.625	2.59998	14.3785	2.23796
	50.6	2.36604	14.4132	2.31934
	50.575	2.27755	14.535	2.36003
	50.55	2.46033	14.5148	2.0345
	50.525	2.46605	14.4058	2.07519
	50.5	2.44706	14.3808	2.31934
	50.475	2.45402	14.2408	2.15658
	50.45	2.42323	14.2492	2.07519
	50.425	2.39033	14.2158	2.27865
	50.4	2.38727	14.3331	2.31934
	50.375	2.41572	14.2673	2.19727
	50.35	2.48172	14.2029	2.07519
	50.325	2.51514	14.3437	2.31934
	50.3	2.4503	14.2013	2.27865
	50.275	2.30426	14.0458	2.23796
	50.25	2.56108	14.0443	2.0345
	50.225	2.54867	14.1064	2.23796
	50.2	2.41565	14.0741	2.19727
	50.175	2.39553	14.1596	1.95312
	50.15	2.46816	14.2828	2.15658
	50.125	2.44691	14.371	2.52279
	50.1	2.38761	14.3089	2.36003
	50.075	2.43187	14.0742	2.19727
[truncated: 8,003 more rows]

## Sheet: Fig.1g
Figure. 1g
	Control	TMEM87A WT	TMEM87A -AAA
	-3.50259	-49.6317	-10.3923
	-3.62361	-94.8509	-2.90828
	-6.59409	-77.7476	-4.51028
	-6.49858	-86.6341	-4.80511
	-2.4901	-75.8401	-6.39416
	-10.0213	-65.9522	-2.9219
	-2.38241	-40.6378	-4.1097
		-57.9293	-4.48788
		-38.0347	-7.64324
		-56.2054	-3.26974
		-46.5143	-3.19556
		-25.2685	-1.84502
		-59.3737			one way-ANOVA
		-76.0069			Dunn's multiple comparisons test	Mean rank diff.	Significant?	Summary	Adjusted P Value
		-86.662			hTMEM87A WT vs. Control	-17.36	Yes	***	0.0004
		-75.9254			hTMEM87A WT vs. hTMEM87A AAA	-17.58	Yes	****	<0.0001

## Sheet: Fig.1h
Figure. 1h
	Control	TMEM87A WT	TMEM87A -AAA
	4.68167	27.3371	3.52872
	4.67106	17.2324	2.28785
	7.42233	30.193	3.2802
	6.26956	31.5986	4.24281
	3.43081	39.0433	4.41778
	9.07586	20.5184	4.31791
	2.60931	5.61907	4.63867
		26.9297	5.70225
		11.6942	8.80634
		34.7105	4.56925
		30.4241	4.11428
		14.9091	3.24125
		21.2455			one way-ANOVA
		43.563			Dunn's multiple comparisons test	Mean rank diff.	Significant?	Summary	Adjusted P Value
		4.63746			hTMEM87A WT vs. Control	13.26	Yes	**	0.0086
		25.0661			hTMEM87A WT vs. hTMEM87A AAA	17.6	Yes	****	<0.0001

## Sheet: Fig.1i
Figure. 1i
	Control	TMEM87A WT	TMEM87A -AAA
	0.748148	1.66667	2.94505
	0.775758	1.95164	1.27119
	0.888412	2.67553	1.375
	1.03653	4.40254	1.13253
	0.725806	2.32192	1.44737
	1.10417	2.47368	0.676692
	0.913043	1.8172	0.885965
		2.73272	0.787037
		4.12389	0.867925
			0.715596
			0.776699
			0.569231
			1.06276

## Sheet: Fig.1j
Figure.1j
		Control											TMEM87A
	0	-13.4277	-11.2915	-10.376	-11.9019	-15.2588	-14.6484	-12.8174	-10.9863	-14.9536	-11.2915	-11.9019	-168.762	-193.481	-188.599	-189.209	-230.713	-222.473	-241.394	-198.059	-215.759	-200.5	-212.097
	0.099991	-15.2588	-10.376	-12.5122	-14.0381	-14.9536	-13.7329	-13.7329	-11.2915	-15.2588	-12.5122	-9.76562	-167.542	-198.669	-186.157	-191.04	-231.628	-225.22	-238.953	-196.228	-213.013	-195.007	-211.487
	0.199997	-12.8174	-9.46045	-13.4277	-14.3433	-14.9536	-13.1226	-13.1226	-13.1226	-15.8691	-11.5967	-11.2915	-170.898	-199.585	-187.683	-188.904	-232.544	-221.252	-240.173	-196.838	-207.214	-191.956	-213.928
	0.300003	-12.207	-8.8501	-13.4277	-13.1226	-17.0898	-16.1743	-11.9019	-11.5967	-12.5122	-10.9863	-11.2915	-174.561	-196.228	-190.125	-189.819	-233.154	-214.844	-238.342	-197.449	-203.552	-190.735	-213.623
	0.399994	-12.5122	-9.46045	-13.7329	-14.0381	-18.0054	-15.2588	-13.1226	-12.207	-12.207	-13.4277	-11.9019	-174.866	-193.481	-186.462	-189.514	-234.07	-214.539	-240.479	-199.28	-204.468	-197.144	-209.961
	0.5	-12.8174	-12.5122	-12.207	-12.207	-17.0898	-13.4277	-12.5122	-13.1226	-12.207	-14.0381	-11.9019	-171.509	-190.125	-184.937	-186.462	-238.037	-222.473	-245.972	-204.773	-203.552	-201.416	-204.773
	0.599991	-13.4277	-10.376	-12.207	-14.3433	-16.7847	-11.9019	-13.7329	-12.5122	-11.9019	-14.3433	-12.8174	-169.678	-189.819	-186.157	-182.495	-243.225	-226.746	-245.667	-205.383	-198.364	-201.111	-201.416
	0.699997	-13.4277	-8.54492	-12.8174	-16.4795	-14.3433	-13.1226	-13.1226	-12.207	-13.7329	-12.8174	-11.5967	-171.814	-194.702	-185.547	-181.885	-249.329	-231.934	-248.108	-204.163	-199.89	-204.773	-205.994
	0.800003	-11.9019	-9.76562	-10.0708	-18.9209	-14.6484	-15.2588	-13.4277	-10.6812	-15.564	-12.207	-11.2915	-173.035	-196.838	-186.157	-177.307	-251.77	-228.577	-250.854	-202.637	-203.247	-206.299	-210.266
	0.899994	-8.8501	-10.6812	-10.6812	-15.2588	-17.0898	-15.564	-13.7329	-10.376	-12.5122	-10.9863	-13.7329	-171.509	-198.059	-187.378	-171.814	-250.549	-221.558	-250.854	-201.721	-202.637	-208.74	-210.876
	1	-12.207	-11.5967	-11.9019	-12.207	-16.4795	-11.9019	-14.0381	-10.9863	-10.0708	-11.2915	-12.8174	-171.204	-194.702	-183.411	-168.762	-248.108	-220.337	-242.31	-200.806	-197.144	-201.416	-209.351
	1.09999	-15.8691	-11.9019	-10.376	-12.207	-14.0381	-9.76562	-13.7329	-12.207	-10.376	-12.5122	-13.1226	-170.593	-194.702	-181.274	-170.593	-248.718	-218.506	-239.868	-197.449	-195.007	-193.481	-208.435
	1.2	-11.2915	-12.5122	-10.9863	-12.5122	-10.6812	-8.54492	-14.6484	-14.6484	-12.207	-11.9019	-11.5967	-173.035	-196.533	-186.462	-175.476	-253.296	-215.454	-246.582	-191.956	-195.618	-198.059	-209.656
	1.3	-13.1226	-11.5967	-13.7329	-11.9019	-10.9863	-10.9863	-13.7329	-14.0381	-12.207	-10.376	-12.5122	-175.476	-196.838	-186.157	-175.476	-254.211	-215.759	-252.38	-187.378	-199.89	-201.416	-211.182
	1.39999	-11.9019	-11.2915	-12.8174	-14.0381	-12.5122	-12.207	-14.9536	-14.0381	-13.7329	-10.9863	-10.9863	-180.054	-198.364	-186.768	-169.373	-249.939	-214.233	-248.718	-189.819	-204.468	-199.28	-207.825
	1.5	-10.376	-11.9019	-11.5967	-13.7329	-17.0898	-11.9019	-13.4277	-13.7329	-15.2588	-13.7329	-10.376	-185.242	-200.5	-186.768	-172.119	-246.887	-209.961	-235.291	-196.228	-200.806	-203.552	-207.214
	1.59999	-10.0708	-11.9019	-14.6484	-13.1226	-16.1743	-11.2915	-13.4277	-10.0708	-14.6484	-12.207	-11.5967	-185.547	-200.5	-184.326	-175.476	-240.784	-210.876	-233.765	-199.585	-194.397	-208.13	-206.299
	1.7	-11.2915	-13.1226	-12.8174	-12.8174	-14.6484	-11.2915	-11.5967	-11.9019	-13.4277	-10.376	-12.5122	-179.749	-196.228	-185.852	-177.307	-236.511	-213.318	-236.206	-199.28	-192.566	-209.045	-199.89
	1.8	-13.1226	-12.8174	-11.2915	-11.2915	-15.8691	-12.207	-10.9863	-13.7329	-10.9863	-11.9019	-13.1226	-176.086	-195.618	-188.293	-175.476	-232.849	-216.064	-232.544	-193.787	-191.345	-208.435	-198.059
	1.89999	-12.8174	-13.4277	-11.9019	-13.1226	-13.7329	-11.2915	-12.207	-11.5967	-11.9019	-11.2915	-10.9863	-177.612	-203.552	-189.514	-178.833	-234.375	-218.811	-229.492	-191.956	-191.345	-206.299	-196.838
	2	-14.0381	-11.5967	-12.5122	-15.564	-12.8174	-14.6484	-12.8174	-10.376	-15.2588	-9.46045	-9.76562	-178.833	-205.078	-185.852	-185.547	-242.31	-219.421	-236.816	-186.462	-193.787	-202.637	-199.89
	2.09999	-14.0381	-10.0708	-11.2915	-16.4795	-13.1226	-15.8691	-12.8174	-12.207	-16.4795	-9.76562	-11.5967	-181.274	-206.604	-180.969	-194.092	-244.141	-216.064	-245.667	-182.8	-190.735	-198.059	-207.825
	2.2	-11.5967	-10.6812	-11.2915	-15.8691	-13.1226	-15.2588	-13.1226	-13.4277	-14.0381	-12.207	-12.5122	-181.885	-209.961	-183.411	-198.364	-242.004	-213.928	-247.192	-178.528	-191.04	-196.838	-207.825
	2.3	-13.1226	-11.2915	-10.9863	-12.8174	-14.0381	-15.2588	-13.7329	-11.2915	-13.4277	-10.9863	-11.9019	-185.242	-200.5	-187.378	-195.007	-240.173	-214.844	-252.075	-179.443	-193.481	-195.618	-211.182
	2.39999	-14.6484	-10.6812	-10.376	-13.7329	-14.3433	-13.7329	-11.9019	-10.0708	-13.7329	-12.5122	-13.4277	-185.852	-189.819	-187.378	-194.702	-236.206	-220.947	-259.399	-180.664	-195.007	-196.838	-215.759
	2.5	-13.7329	-10.0708	-10.9863	-13.4277	-10.9863	-12.5122	-11.5967	-12.207	-16.1743	-11.5967	-11.9019	-187.073	-184.021	-184.021	-196.228	-235.291	-228.577	-269.47	-181.274	-198.669	-198.975	-216.98
	2.59999	-15.2588	-11.2915	-13.4277	-12.8174	-13.7329	-12.207	-14.9536	-14.9536	-19.8364	-10.9863	-11.2915	-189.819	-181.58	-180.054	-192.871	-239.258	-228.882	-271.606	-177.002	-205.383	-203.247	-215.759
	2.7	-11.9019	-11.2915	-13.7329	-13.7329	-15.2588	-12.207	-13.4277	-13.4277	-17.7002	-11.2915	-11.5967	-191.345	-186.157	-179.443	-187.683	-238.342	-225.22	-263.062	-176.697	-208.13	-206.909	-220.032
	2.8	-10.0708	-10.9863	-11.2915	-14.9536	-13.7329	-10.9863	-12.5122	-11.5967	-15.8691	-11.9019	-11.2915	-188.904	-187.378	-180.969	-185.242	-235.596	-223.999	-253.906	-181.274	-206.604	-204.468	-226.44
	2.89999	-9.15527	-8.8501	-9.46045	-13.4277	-12.8174	-10.9863	-11.5967	-11.9019	-15.2588	-13.7329	-13.1226	-185.852	-184.937	-187.378	-185.242	-233.154	-227.661	-250.854	-181.58	-204.773	-196.228	-229.187
	3	-13.7329	-8.8501	-9.46045	-9.15527	-10.9863	-11.2915	-12.207	-12.5122	-13.4277	-12.8174	-12.207	-185.242	-184.631	-187.073	-184.631	-239.258	-228.882	-249.023	-180.359	-200.5	-193.481	-229.492
	3.09999	-16.7847	-11.5967	-10.6812	-9.76562	-10.0708	-10.0708	-12.207	-12.8174	-14.0381	-11.9019	-13.1226	-188.904	-181.58	-186.768	-184.937	-246.582	-225.525	-248.718	-181.58	-199.89	-195.618	-227.966
	3.2	-13.7329	-12.5122	-11.5967	-11.9019	-14.0381	-10.6812	-14.9536	-13.1226	-14.6484	-12.207	-13.1226	-185.547	-181.58	-188.293	-185.242	-246.887	-220.947	-251.16	-182.495	-202.637	-200.806	-223.999
	3.3	-13.1226	-10.376	-12.5122	-14.3433	-13.7329	-10.0708	-13.4277	-13.1226	-14.3433	-11.5967	-13.1226	-178.223	-180.664	-185.547	-186.157	-247.803	-221.558	-258.484	-187.683	-205.994	-204.163	-219.421
	3.39999	-10.9863	-10.0708	-12.207	-14.0381	-10.9863	-10.9863	-12.207	-14.3433	-14.0381	-10.6812	-12.5122	-176.697	-184.021	-190.125	-185.242	-251.16	-222.778	-263.367	-193.787	-209.045	-206.604	-213.623
	3.5	-11.5967	-9.15527	-9.15527	-11.5967	-12.8174	-12.207	-14.6484	-13.4277	-13.7329	-10.9863	-13.7329	-179.443	-185.242	-192.261	-184.937	-248.413	-222.168	-262.451	-195.923	-204.468	-210.876	-211.182
	3.59999	-10.0708	-8.8501	-11.2915	-9.76562	-14.3433	-11.9019	-15.2588	-12.8174	-11.9019	-13.4277	-12.8174	-179.138	-194.397	-188.904	-186.768	-244.141	-220.337	-260.01	-195.618	-201.416	-214.844	-214.539
	3.7	-12.207	-10.0708	-14.3433	-10.376	-16.1743	-10.376	-11.9019	-13.4277	-11.5967	-13.1226	-13.4277	-177.917	-201.416	-187.683	-188.904	-237.427	-215.454	-259.705	-195.923	-204.468	-212.097	-215.454
	3.8	-15.2588	-12.5122	-14.6484	-12.207	-17.0898	-10.9863	-11.5967	-15.564	-11.2915	-12.5122	-14.0381	-174.255	-199.28	-190.125	-192.566	-231.934	-220.642	-258.484	-194.702	-205.688	-203.552	-214.233
	3.89999	-16.4795	-11.5967	-13.1226	-11.5967	-13.4277	-10.376	-12.207	-15.8691	-13.4277	-13.7329	-14.0381	-172.119	-194.397	-186.462	-195.923	-227.051	-227.661	-255.737	-196.228	-203.552	-200.195	-213.928
	4	-18.0054	-11.2915	-11.5967	-13.4277	-11.2915	-12.5122	-11.2915	-15.2588	-13.4277	-12.207	-12.8174	-169.678	-196.838	-186.157	-200.806	-224.915	-231.018	-253.906	-198.669	-203.247	-198.059	-209.656
	4.09999	-12.8174	-9.76562	-9.76562	-14.0381	-11.5967	-13.4277	-12.5122	-13.4277	-12.207	-11.5967	-12.207	-167.236	-195.007	-196.838	-203.857	-231.323	-232.849	-245.361	-196.228	-202.637	-198.059	-211.792
	4.2	-14.0381	-9.15527	-9.76562	-14.6484	-13.4277	-13.7329	-12.207	-12.8174	-11.9019	-13.7329	-12.5122	-167.542	-193.787	-205.994	-200.5	-236.511	-233.154	-239.563	-195.007	-198.364	-199.585	-215.454
	4.3	-15.8691	-9.76562	-10.376	-14.0381	-12.8174	-14.6484	-10.9863	-11.2915	-11.5967	-14.6484	-14.0381	-169.067	-192.261	-211.182	-198.364	-236.206	-239.563	-237.732	-199.28	-198.669	-203.552	-217.896
	4.39999	-15.8691	-12.207	-10.6812	-10.9863	-12.207	-14.3433	-11.2915	-11.5967	-12.207	-12.5122	-14.6484	-170.288	-194.092	-209.961	-196.533	-240.173	-244.751	-238.037	-204.163	-199.28	-199.585	-217.59
	4.5	-12.207	-12.8174	-11.2915	-9.76562	-13.7329	-12.5122	-12.5122	-14.9536	-11.2915	-12.5122	-12.5122	-173.95	-198.669	-203.552	-197.754	-244.446	-238.342	-238.342	-198.669	-193.176	-196.838	-217.59
	4.59999	-12.5122	-11.5967	-11.5967	-11.2915	-13.1226	-10.6812	-14.6484	-16.1743	-11.2915	-12.8174	-10.376	-176.086	-194.397	-199.585	-195.923	-242.92	-230.103	-235.291	-194.397	-189.514	-196.533	-219.421
	4.7	-13.4277	-11.5967	-10.0708	-12.5122	-12.207	-10.0708	-12.8174	-15.8691	-11.2915	-13.7329	-11.9019	-172.119	-192.871	-195.923	-191.956	-235.291	-222.778	-233.459	-197.754	-191.65	-195.312	-216.37
	4.8	-11.9019	-10.0708	-11.5967	-13.4277	-13.4277	-11.2915	-13.7329	-13.7329	-11.5967	-12.207	-14.6484	-170.593	-193.481	-199.28	-189.819	-231.018	-221.863	-234.68	-198.669	-200.5	-193.787	-214.233
	4.89999	-10.376	-10.6812	-14.3433	-10.9863	-13.7329	-12.207	-14.9536	-12.207	-10.6812	-12.5122	-18.6157	-172.729	-197.144	-202.637	-187.073	-231.628	-223.694	-235.901	-194.702	-204.773	-199.585	-216.675
	5	-14.3433	-10.0708	-15.8691	-10.376	-13.7329	-11.5967	-14.6484	-13.4277	-14.0381	-13.7329	-17.0898	-175.476	-198.975	-208.13	-187.073	-231.628	-226.44	-237.732	-191.345	-204.163	-209.351	-217.59
	5.09999	-17.395	-11.9019	-14.6484	-12.5122	-13.7329	-10.0708	-13.4277	-14.6484	-14.3433	-13.1226	-14.9536	-177.307	-196.533	-206.299	-191.04	-244.141	-228.577	-239.868	-193.787	-207.214	-211.487	-211.487
	5.2	-11.9019	-10.9863	-13.7329	-11.2915	-11.5967	-10.376	-12.5122	-15.564	-14.0381	-9.46045	-14.0381	-175.476	-190.125	-205.078	-195.618	-255.432	-228.271	-239.868	-191.04	-204.773	-213.318	-203.552
	5.3	-9.46045	-11.9019	-12.207	-10.0708	-10.9863	-13.4277	-11.5967	-15.564	-13.1226	-9.76562	-14.3433	-180.054	-188.293	-207.52	-203.247	-253.296	-223.389	-234.07	-191.04	-195.618	-218.811	-202.637
	5.39999	-9.46045	-12.5122	-12.5122	-10.9863	-14.0381	-11.2915	-11.2915	-12.207	-11.5967	-11.5967	-12.5122	-179.138	-191.345	-211.792	-205.383	-251.16	-220.947	-227.966	-187.073	-191.956	-221.558	-205.688
	5.5	-9.15527	-11.5967	-11.2915	-11.9019	-16.7847	-9.15527	-12.207	-13.4277	-10.376	-13.1226	-13.7329	-176.086	-190.735	-214.233	-204.163	-253.601	-221.252	-227.051	-186.768	-194.092	-218.506	-208.435
	5.59999	-12.5122	-10.376	-11.2915	-12.8174	-14.9536	-10.6812	-12.5122	-16.4795	-11.9019	-13.7329	-14.3433	-175.781	-189.819	-216.98	-205.383	-248.718	-220.947	-229.492	-186.157	-194.397	-218.506	-211.182
	5.7	-12.8174	-12.8174	-14.0381	-12.207	-15.2588	-12.207	-12.207	-15.8691	-12.207	-13.4277	-13.1226	-176.086	-189.819	-220.337	-208.13	-241.394	-221.252	-237.122	-185.852	-196.838	-219.116	-216.064
	5.8	-9.76562	-12.5122	-11.5967	-12.8174	-17.7002	-9.76562	-12.5122	-14.3433	-11.5967	-11.5967	-15.2588	-176.697	-188.904	-225.83	-210.571	-237.732	-226.44	-237.732	-182.19	-199.585	-219.727	-213.623
	5.89999	-12.207	-13.4277	-11.9019	-14.6484	-15.2588	-10.0708	-12.5122	-15.2588	-11.2915	-14.6484	-13.1226	-178.528	-188.293	-232.544	-212.097	-236.816	-228.882	-234.68	-183.411	-201.416	-218.811	-207.52
	6	-14.0381	-12.8174	-12.207	-14.6484	-15.2588	-12.8174	-12.8174	-14.3433	-13.1226	-14.0381	-11.9019	-180.969	-188.293	-227.051	-211.487	-238.953	-233.459	-237.732	-189.514	-204.468	-215.149	-202.332
	6.09999	-15.564	-11.9019	-12.8174	-14.6484	-15.2588	-14.0381	-13.1226	-14.6484	-14.3433	-12.207	-14.0381	-181.58	-188.293	-223.694	-208.13	-237.122	-235.291	-246.887	-190.735	-203.247	-214.233	-200.806
	6.2	-10.376	-11.2915	-9.76562	-17.0898	-14.0381	-12.5122	-14.3433	-14.6484	-13.7329	-12.8174	-14.6484	-181.58	-191.345	-223.083	-209.351	-240.173	-233.765	-253.296	-188.293	-201.721	-214.539	-204.468
	6.3	-9.46045	-10.9863	-11.9019	-18.9209	-13.7329	-10.376	-12.207	-13.7329	-13.7329	-14.9536	-14.6484	-179.749	-194.397	-219.421	-214.539	-242.31	-230.713	-255.432	-188.293	-204.468	-213.318	-206.909
	6.39999	-10.9863	-9.76562	-14.0381	-15.8691	-14.6484	-11.2915	-12.207	-13.4277	-14.9536	-14.6484	-13.7329	-177.307	-200.195	-215.454	-222.778	-245.361	-234.375	-251.77	-186.768	-205.383	-215.149	-207.52
	6.5	-11.2915	-10.9863	-12.207	-14.9536	-14.9536	-13.4277	-12.5122	-14.9536	-14.3433	-13.7329	-12.5122	-176.392	-202.332	-209.045	-222.778	-244.141	-239.258	-245.972	-184.937	-201.111	-214.233	-208.74
	6.59999	-11.2915	-11.9019	-12.8174	-13.1226	-14.0381	-12.207	-13.4277	-14.3433	-15.8691	-12.8174	-11.9019	-179.138	-198.669	-205.383	-216.98	-243.53	-243.53	-243.835	-184.021	-198.669	-215.454	-210.571
	6.7	-12.8174	-13.4277	-12.5122	-12.207	-13.4277	-11.9019	-14.9536	-14.6484	-15.564	-10.9863	-9.46045	-179.138	-193.176	-204.468	-204.163	-245.667	-244.141	-242.615	-185.547	-198.669	-220.337	-212.402
	6.8	-12.8174	-10.6812	-12.207	-13.4277	-12.8174	-12.5122	-14.0381	-11.9019	-14.0381	-11.5967	-9.15527	-177.307	-187.683	-201.721	-193.481	-252.38	-246.277	-234.07	-186.157	-200.195	-224.609	-215.759
	6.89999	-10.376	-9.76562	-13.1226	-13.1226	-13.1226	-12.8174	-9.46045	-12.5122	-13.7329	-12.207	-12.207	-177.002	-184.937	-198.364	-191.04	-260.925	-248.108	-231.018	-185.852	-204.468	-226.746	-219.116
	7	-14.0381	-10.376	-11.9019	-11.9019	-14.3433	-12.207	-8.8501	-14.0381	-12.8174	-12.5122	-12.5122	-173.035	-184.021	-198.059	-191.65	-260.01	-244.141	-234.07	-181.58	-204.468	-228.271	-220.337
	7.09999	-12.8174	-11.5967	-12.5122	-11.9019	-13.7329	-13.4277	-12.5122	-14.6484	-10.376	-11.9019	-12.5122	-169.373	-186.768	-198.364	-194.702	-255.737	-238.953	-240.173	-179.138	-203.247	-228.271	-219.421
	7.2	-9.46045	-10.376	-14.3433	-10.0708	-14.3433	-10.9863	-14.3433	-14.0381	-11.9019	-9.76562	-12.5122	-167.236	-191.345	-196.533	-198.669	-255.127	-240.479	-244.446	-178.833	-201.111	-227.966	-213.318
	7.3	-12.5122	-9.46045	-14.9536	-11.5967	-14.6484	-11.5967	-14.0381	-13.4277	-11.5967	-10.376	-9.76562	-165.1	-194.702	-195.312	-198.669	-263.367	-246.887	-250.244	-177.002	-200.5	-227.051	-208.13
	7.39999	-13.7329	-9.15527	-15.2588	-13.4277	-13.4277	-13.1226	-10.9863	-12.207	-12.8174	-11.2915	-9.76562	-166.626	-193.176	-190.43	-196.533	-269.47	-250.244	-252.991	-177.917	-196.228	-227.966	-209.045
	7.5	-14.3433	-10.376	-12.8174	-11.5967	-13.7329	-11.2915	-9.76562	-12.207	-13.1226	-11.5967	-10.9863	-166.016	-187.378	-184.021	-195.618	-267.639	-243.835	-252.38	-180.054	-199.585	-223.694	-216.37
	7.59999	-13.1226	-10.376	-13.7329	-14.0381	-13.1226	-9.46045	-13.1226	-14.3433	-11.9019	-11.2915	-12.8174	-169.067	-187.683	-180.969	-195.618	-261.536	-237.122	-252.075	-180.359	-208.435	-219.421	-222.473
	7.7	-13.4277	-10.376	-14.3433	-14.3433	-13.4277	-10.6812	-14.6484	-13.4277	-12.5122	-12.207	-12.8174	-170.288	-190.735	-183.411	-197.449	-252.686	-240.173	-251.77	-180.664	-215.759	-216.064	-226.44
	7.8	-12.8174	-11.9019	-16.1743	-12.8174	-17.0898	-11.2915	-12.5122	-12.207	-13.7329	-10.9863	-11.9019	-167.236	-190.735	-186.157	-197.449	-247.803	-246.582	-247.498	-179.443	-215.149	-213.623	-223.999
	7.89999	-13.4277	-12.8174	-13.7329	-10.6812	-14.3433	-11.9019	-10.6812	-14.0381	-14.9536	-8.54492	-9.15527	-162.354	-191.956	-191.345	-198.975	-245.972	-251.77	-239.868	-179.138	-216.064	-211.182	-228.577
	8	-10.9863	-13.7329	-13.7329	-13.1226	-14.3433	-11.5967	-11.5967	-14.0381	-13.4277	-10.376	-7.32422	-159.302	-198.364	-197.144	-200.195	-244.446	-253.601	-230.103	-183.716	-215.454	-212.402	-233.154
	8.09999	-11.9019	-11.9019	-13.4277	-13.4277	-13.4277	-10.9863	-13.4277	-14.0381	-12.207	-12.207	-9.15527	-158.691	-201.721	-200.195	-199.585	-248.413	-252.38	-225.525	-184.937	-209.351	-216.98	-231.934
	8.2	-14.0381	-11.2915	-11.9019	-14.0381	-14.3433	-13.7329	-13.1226	-13.4277	-12.207	-12.8174	-11.9019	-159.912	-201.111	-198.669	-201.111	-256.042	-252.991	-224.915	-184.326	-204.773	-220.947	-230.408
	8.3	-10.0708	-8.8501	-12.5122	-13.4277	-15.2588	-13.4277	-12.207	-11.2915	-12.5122	-14.0381	-9.76562	-166.016	-203.857	-195.923	-205.078	-258.789	-255.432	-226.44	-187.073	-204.468	-220.642	-233.154
	8.39999	-12.5122	-10.9863	-14.6484	-13.4277	-14.9536	-13.4277	-11.9019	-11.9019	-11.9019	-12.5122	-11.5967	-173.645	-206.299	-196.228	-209.045	-261.23	-253.906	-230.408	-189.209	-211.182	-216.98	-232.849
	8.5	-14.3433	-11.2915	-14.0381	-15.564	-12.5122	-11.9019	-13.4277	-13.1226	-10.9863	-13.1226	-12.207	-176.697	-209.961	-199.89	-211.487	-259.094	-252.991	-227.966	-190.125	-217.59	-216.98	-236.816
	8.59999	-12.207	-9.76562	-15.8691	-12.8174	-11.2915	-12.8174	-13.4277	-14.6484	-12.8174	-12.5122	-11.2915	-174.866	-203.857	-202.637	-209.351	-256.042	-255.127	-230.103	-191.956	-215.759	-218.506	-239.868
	8.7	-15.2588	-9.15527	-14.6484	-12.8174	-12.5122	-13.4277	-12.8174	-13.1226	-14.9536	-11.2915	-10.9863	-173.645	-197.449	-201.111	-204.468	-256.042	-260.01	-236.206	-193.787	-218.811	-215.759	-236.206
	8.8	-13.4277	-8.8501	-8.54492	-12.5122	-14.6484	-12.8174	-14.0381	-11.2915	-14.0381	-10.0708	-11.2915	-176.697	-201.721	-196.533	-201.111	-258.789	-258.789	-236.511	-191.956	-221.863	-209.656	-238.342
	8.89999	-11.5967	-9.46045	-11.2915	-11.9019	-12.5122	-11.5967	-13.4277	-12.207	-11.5967	-10.6812	-13.1226	-177.917	-207.214	-193.176	-202.332	-263.977	-251.465	-232.544	-187.988	-219.727	-205.078	-234.375
	9	-11.5967	-10.9863	-12.5122	-11.2915	-13.1226	-10.9863	-11.5967	-12.207	-11.5967	-11.5967	-15.8691	-176.086	-207.825	-192.261	-199.585	-264.893	-251.465	-225.22	-187.378	-219.421	-207.214	-227.966
	9.09999	-12.8174	-11.9019	-13.4277	-9.15527	-12.8174	-11.9019	-11.5967	-14.9536	-10.9863	-11.2915	-14.6484	-174.561	-204.468	-191.04	-201.111	-256.653	-252.38	-217.896	-188.599	-217.285	-207.52	-225.83
	9.2	-12.207	-13.4277	-12.8174	-9.76562	-11.9019	-11.5967	-10.9863	-12.207	-11.9019	-11.2915	-11.9019	-176.697	-198.669	-194.092	-201.721	-255.737	-249.023	-221.558	-184.326	-210.571	-206.909	-224.609
	9.3	-15.2588	-13.4277	-12.207	-12.8174	-12.8174	-11.2915	-11.5967	-12.5122	-12.5122	-10.0708	-13.4277	-179.443	-205.688	-196.533	-201.416	-258.484	-248.413	-226.135	-181.274	-206.299	-207.52	-226.135
	9.39999	-13.4277	-12.8174	-10.9863	-13.7329	-12.207	-11.5967	-13.4277	-15.564	-12.8174	-10.9863	-11.5967	-181.885	-213.928	-192.261	-198.364	-257.874	-253.906	-230.103	-177.002	-202.332	-206.604	-227.661
	9.5	-9.46045	-12.8174	-11.2915	-13.7329	-12.5122	-13.7329	-13.4277	-12.8174	-11.5967	-11.5967	-10.376	-179.749	-211.792	-191.65	-200.5	-255.432	-253.296	-230.408	-180.359	-204.468	-204.468	-227.051
	9.59999	-9.46045	-13.7329	-10.0708	-12.5122	-13.7329	-13.1226	-13.4277	-12.207	-11.5967	-11.9019	-12.207	-178.528	-200.806	-195.007	-210.876	-249.939	-251.77	-235.901	-183.716	-208.74	-203.247	-223.083
	9.7	-11.2915	-13.1226	-10.376	-12.8174	-12.207	-14.9536	-11.9019	-13.7329	-11.2915	-10.9863	-10.9863	-178.223	-195.618	-202.637	-215.759	-253.601	-249.329	-240.784	-185.242	-214.539	-207.52	-223.083
	9.8	-12.5122	-12.5122	-12.5122	-14.0381	-10.6812	-13.7329	-10.9863	-15.2588	-11.9019	-10.6812	-12.207	-177.612	-197.144	-205.078	-213.623	-259.705	-243.53	-234.68	-184.631	-218.811	-215.759	-220.947
	9.89999	-12.8174	-12.8174	-12.207	-13.7329	-14.0381	-12.5122	-12.8174	-15.2588	-13.7329	-8.8501	-10.376	-175.476	-195.923	-207.52	-209.351	-261.536	-240.173	-231.934	-184.937	-220.642	-224.915	-218.811
	10	-8.54492	-12.8174	-12.207	-13.7329	-12.207	-10.9863	-13.4277	-13.4277	-14.3433	-9.15527	-9.15527	-170.593	-194.092	-211.487	-201.416	-257.263	-231.323	-233.765	-188.904	-214.539	-226.135	-220.337
	10.1	-10.376	-9.46045	-13.4277	-14.6484	-12.5122	-11.9019	-11.2915	-11.5967	-14.6484	-11.2915	-11.9019	-169.983	-191.345	-213.013	-194.397	-253.906	-231.018	-236.816	-190.125	-211.487	-226.44	-221.252
	10.2	-11.9019	-9.15527	-13.1226	-14.3433	-16.1743	-13.1226	-11.9019	-12.207	-14.9536	-10.9863	-12.5122	-171.204	-191.956	-209.961	-192.261	-250.244	-237.427	-241.394	-192.261	-212.402	-225.525	-215.759
	10.3	-11.9019	-10.0708	-11.9019	-10.376	-13.7329	-11.9019	-11.9019	-12.207	-14.9536	-11.5967	-11.9019	-173.34	-196.838	-211.487	-193.176	-252.38	-236.816	-246.582	-190.735	-214.844	-220.947	-213.623
	10.4	-10.9863	-12.8174	-11.2915	-13.1226	-12.8174	-9.76562	-9.46045	-12.5122	-14.3433	-11.2915	-11.9019	-172.729	-199.585	-207.52	-193.787	-258.179	-231.323	-252.38	-182.495	-217.896	-220.337	-213.013
	10.5	-9.15527	-12.5122	-12.207	-14.0381	-11.2915	-6.40869	-9.76562	-12.5122	-16.7847	-10.0708	-12.5122	-169.678	-199.89	-202.332	-191.65	-260.925	-231.323	-257.874	-179.138	-215.149	-219.116	-209.961
	10.6	-10.9863	-11.5967	-10.9863	-11.2915	-13.1226	-10.9863	-11.5967	-11.5967	-14.9536	-9.76562	-10.9863	-167.847	-199.585	-203.552	-194.702	-263.062	-234.375	-256.348	-185.852	-213.623	-215.149	-209.656
	10.7	-12.207	-10.376	-11.2915	-10.0708	-12.207	-10.376	-12.5122	-12.8174	-12.8174	-11.5967	-11.2915	-170.288	-195.923	-204.468	-193.787	-263.672	-236.206	-253.296	-193.176	-215.454	-213.928	-211.182
	10.8	-10.9863	-11.9019	-8.8501	-10.6812	-13.7329	-11.5967	-12.207	-13.1226	-12.5122	-10.9863	-8.23975	-176.697	-194.397	-209.351	-188.904	-263.367	-235.596	-254.822	-198.059	-217.285	-213.013	-210.876
	10.9	-11.2915	-10.9863	-10.9863	-10.6812	-13.7329	-15.2588	-12.5122	-10.9863	-11.5967	-11.9019	-10.6812	-182.8	-198.364	-209.351	-190.125	-260.925	-234.68	-251.16	-196.838	-216.98	-209.351	-212.097
	11	-10.6812	-11.5967	-12.207	-9.76562	-16.1743	-15.2588	-10.9863	-11.2915	-12.207	-12.8174	-13.4277	-191.345	-199.28	-205.383	-189.209	-253.906	-233.459	-243.225	-197.144	-217.896	-208.13	-216.98
	11.1	-14.0381	-13.1226	-12.207	-10.376	-14.6484	-14.9536	-12.5122	-12.5122	-13.4277	-11.5967	-11.5967	-187.683	-198.669	-204.773	-191.345	-252.38	-230.713	-245.667	-198.975	-216.37	-206.909	-221.863
	11.2	-14.9536	-10.9863	-13.7329	-10.0708	-9.76562	-15.2588	-14.0381	-15.2588	-14.3433	-12.8174	-11.5967	-185.242	-198.059	-205.688	-196.228	-246.887	-227.051	-241.089	-197.449	-216.675	-203.857	-226.746
	11.3	-13.4277	-9.76562	-13.4277	-12.5122	-12.8174	-12.5122	-13.4277	-13.4277	-15.2588	-8.8501	-10.376	-188.293	-199.89	-204.773	-194.092	-249.023	-229.187	-234.985	-193.787	-214.844	-201.721	-230.103
	11.4	-11.2915	-9.76562	-12.207	-11.9019	-13.4277	-15.8691	-14.3433	-10.6812	-16.1743	-7.62939	-11.2915	-190.43	-201.721	-212.708	-194.397	-257.568	-234.07	-238.342	-190.43	-213.318	-200.5	-233.154
	11.5	-11.9019	-9.76562	-12.8174	-13.4277	-11.2915	-18.9209	-13.1226	-10.0708	-14.0381	-9.15527	-12.5122	-184.326	-204.163	-216.675	-194.092	-265.808	-238.953	-241.699	-196.228	-212.402	-195.007	-234.985
	11.6	-12.5122	-9.76562	-11.9019	-12.207	-14.0381	-19.5312	-12.8174	-12.5122	-13.1226	-11.9019	-13.1226	-178.528	-204.773	-214.539	-192.566	-271.301	-235.291	-241.089	-196.838	-215.454	-193.176	-237.732
	11.7	-13.7329	-10.0708	-10.6812	-12.5122	-12.8174	-16.4795	-13.4277	-13.1226	-12.8174	-13.1226	-9.76562	-177.002	-203.247	-209.961	-191.65	-275.269	-236.511	-243.835	-197.144	-222.778	-196.228	-248.413
	11.8	-13.7329	-10.9863	-11.5967	-14.9536	-12.5122	-15.8691	-14.0381	-11.9019	-12.8174	-10.376	-11.5967	-173.95	-203.857	-206.604	-188.599	-272.827	-247.803	-250.244	-192.566	-224.304	-201.416	-245.667
	11.9	-14.3433	-12.8174	-13.4277	-15.2588	-11.2915	-15.564	-13.4277	-13.7329	-14.0381	-11.2915	-14.3433	-170.288	-211.792	-202.942	-189.209	-271.912	-252.686	-253.906	-187.378	-221.863	-203.552	-238.342
	12	-10.6812	-12.8174	-10.376	-14.0381	-11.2915	-17.0898	-15.8691	-14.6484	-15.2588	-10.0708	-13.1226	-169.678	-215.149	-203.552	-189.819	-274.353	-254.211	-257.568	-188.293	-216.064	-203.247	-239.258
	12.1	-10.376	-10.376	-11.9019	-14.6484	-9.76562	-18.0054	-14.6484	-12.8174	-14.6484	-12.5122	-11.5967	-169.373	-208.74	-205.383	-190.735	-267.639	-249.023	-256.348	-190.125	-213.318	-202.332	-237.427
	12.2	-12.207	-11.2915	-12.5122	-13.4277	-11.5967	-15.8691	-12.8174	-11.9019	-15.564	-12.8174	-11.5967	-168.762	-198.059	-198.669	-191.04	-263.367	-244.446	-250.244	-190.125	-213.928	-199.28	-228.577
	12.3	-11.2915	-8.8501	-10.9863	-12.8174	-12.8174	-14.9536	-13.7329	-10.9863	-14.0381	-14.9536	-12.207	-169.678	-196.228	-193.176	-192.261	-266.113	-243.835	-248.413	-190.125	-212.402	-196.838	-229.187
	12.4	-11.5967	-9.76562	-13.4277	-12.5122	-11.2915	-14.9536	-12.207	-11.5967	-12.207	-16.1743	-15.8691	-169.678	-193.787	-190.43	-196.533	-273.132	-245.972	-251.77	-187.378	-216.064	-189.514	-224.915
	12.5	-13.7329	-10.9863	-15.8691	-12.5122	-11.5967	-12.8174	-11.9019	-12.8174	-13.1226	-11.9019	-15.2588	-173.035	-196.533	-190.125	-198.364	-281.067	-248.108	-257.874	-184.326	-217.896	-186.768	-220.337
	12.6	-14.0381	-11.5967	-13.7329	-13.1226	-10.6812	-11.5967	-13.7329	-12.8174	-14.9536	-11.2915	-12.8174	-175.171	-203.247	-190.125	-197.449	-281.982	-248.718	-256.348	-185.242	-219.421	-185.242	-214.539
	12.7	-12.8174	-11.2915	-12.207	-13.1226	-10.6812	-11.2915	-14.3433	-13.4277	-14.3433	-11.5967	-16.1743	-175.171	-201.111	-192.566	-197.449	-274.353	-246.277	-246.887	-181.885	-218.811	-184.631	-214.844
	12.8	-12.207	-10.9863	-11.5967	-14.0381	-13.7329	-11.9019	-14.9536	-13.7329	-13.4277	-11.5967	-13.7329	-173.645	-198.059	-200.5	-193.787	-273.743	-242.004	-240.173	-183.411	-219.421	-185.852	-220.642
	12.9	-12.207	-10.9863	-12.207	-14.3433	-15.2588	-11.5967	-13.4277	-12.8174	-12.207	-11.5967	-11.9019	-174.866	-199.28	-205.688	-194.702	-273.438	-240.173	-238.037	-191.956	-223.083	-188.293	-222.778
	13	-11.5967	-10.376	-14.0381	-12.8174	-12.5122	-11.2915	-12.8174	-11.5967	-12.8174	-14.6484	-13.7329	-177.917	-201.111	-203.857	-194.092	-269.47	-238.342	-238.953	-192.871	-223.083	-188.293	-223.389
	13.1	-8.8501	-11.5967	-15.2588	-11.5967	-13.7329	-12.5122	-12.5122	-10.9863	-12.8174	-12.207	-14.3433	-178.528	-199.585	-197.754	-185.852	-273.743	-241.394	-238.953	-191.04	-225.83	-188.599	-225.22
	13.2	-9.15527	-12.5122	-13.7329	-11.5967	-14.6484	-12.207	-12.8174	-12.5122	-15.2588	-10.9863	-13.7329	-180.969	-197.144	-198.669	-182.19	-277.1	-243.835	-238.342	-187.988	-225.22	-190.125	-222.778
	13.3	-13.4277	-11.9019	-11.9019	-13.4277	-14.6484	-10.376	-13.4277	-11.9019	-13.7329	-12.5122	-13.4277	-186.768	-195.312	-202.637	-182.8	-280.762	-238.953	-241.089	-185.242	-227.051	-195.007	-219.727
	13.4	-11.2915	-14.3433	-11.2915	-14.3433	-14.3433	-12.207	-14.0381	-14.9536	-13.7329	-12.207	-13.1226	-189.209	-198.364	-199.28	-185.852	-280.457	-236.511	-245.667	-187.683	-230.103	-199.585	-223.389
	13.5	-10.0708	-13.1226	-11.2915	-14.6484	-16.4795	-12.8174	-14.9536	-14.9536	-13.4277	-13.1226	-12.207	-185.852	-200.806	-195.618	-192.261	-278.015	-238.037	-246.887	-191.956	-228.271	-205.078	-224.609
	13.6	-11.2915	-12.207	-12.207	-13.7329	-16.4795	-12.5122	-15.2588	-14.6484	-12.207	-13.4277	-13.7329	-189.209	-198.059	-194.397	-195.923	-273.438	-240.784	-245.972	-191.956	-222.778	-202.332	-221.252
	13.7	-12.207	-10.9863	-10.376	-12.8174	-14.3433	-11.5967	-13.4277	-16.7847	-13.7329	-11.9019	-11.9019	-189.514	-197.754	-191.04	-197.144	-274.658	-240.173	-247.192	-192.261	-218.506	-197.144	-215.454
	13.8	-13.1226	-10.376	-10.376	-13.1226	-12.5122	-12.8174	-10.376	-18.0054	-14.9536	-10.6812	-12.8174	-187.683	-199.585	-193.481	-197.449	-272.827	-240.479	-248.108	-192.261	-216.064	-199.585	-213.013
	13.9	-11.2915	-10.6812	-11.9019	-13.7329	-13.7329	-11.9019	-9.76562	-16.4795	-13.4277	-11.5967	-13.4277	-189.514	-199.28	-194.092	-193.481	-271.301	-244.751	-249.023	-193.787	-218.506	-204.468	-214.539
	14	-7.62939	-10.376	-11.5967	-14.6484	-14.9536	-11.5967	-10.9863	-13.7329	-15.564	-11.5967	-11.5967	-188.599	-196.228	-193.787	-196.228	-273.743	-246.277	-250.549	-195.007	-215.149	-203.247	-212.402
	14.1	-9.46045	-9.15527	-11.9019	-11.9019	-15.2588	-13.7329	-11.9019	-12.207	-15.8691	-12.5122	-9.46045	-183.411	-197.144	-191.956	-197.144	-271.912	-241.394	-250.244	-192.871	-209.656	-202.332	-210.571
	14.2	-11.5967	-11.2915	-14.0381	-12.5122	-13.7329	-12.207	-12.5122	-12.5122	-15.8691	-13.7329	-9.76562	-179.138	-198.669	-188.599	-196.533	-267.334	-236.206	-254.517	-192.261	-205.994	-203.247	-208.435
	14.3	-10.9863	-10.6812	-12.207	-11.2915	-15.2588	-10.376	-12.8174	-13.4277	-14.0381	-14.3433	-10.376	-179.138	-202.332	-186.462	-197.449	-267.639	-234.985	-257.263	-191.345	-207.52	-203.247	-210.571
	14.4	-8.8501	-9.46045	-12.207	-11.5967	-15.8691	-9.15527	-12.207	-13.4277	-13.4277	-13.4277	-11.5967	-177.612	-203.552	-189.819	-196.838	-268.555	-236.206	-258.789	-191.04	-208.435	-201.111	-216.064
	14.5	-10.0708	-10.376	-13.1226	-12.5122	-16.4795	-8.8501	-13.4277	-12.8174	-12.5122	-10.9863	-10.376	-171.814	-199.89	-191.345	-192.566	-271.301	-237.732	-255.127	-190.125	-205.688	-199.28	-214.844
	14.6	-9.76562	-11.5967	-12.5122	-11.2915	-16.4795	-10.9863	-14.3433	-13.4277	-12.5122	-11.2915	-9.46045	-168.457	-197.144	-187.988	-195.312	-271.301	-245.361	-246.582	-191.65	-203.552	-201.721	-213.623
	14.7	-12.207	-9.76562	-10.376	-10.0708	-14.9536	-12.207	-14.9536	-13.4277	-14.3433	-10.376	-10.9863	-168.762	-201.416	-191.65	-200.806	-267.639	-249.329	-240.173	-194.397	-209.961	-202.332	-214.539
	14.8	-13.1226	-10.9863	-11.5967	-12.5122	-15.2588	-13.4277	-14.6484	-14.0381	-14.6484	-9.76562	-11.2915	-171.204	-203.247	-195.923	-202.332	-266.724	-251.77	-243.835	-192.566	-213.318	-201.721	-213.928
	14.9	-10.376	-10.376	-13.1226	-14.6484	-14.3433	-12.5122	-14.6484	-13.4277	-16.4795	-10.0708	-11.2915	-177.917	-202.637	-196.533	-199.89	-263.367	-258.484	-248.718	-186.462	-212.097	-205.383	-211.182
	15	-10.376	-9.76562	-13.7329	-13.7329	-15.2588	-12.8174	-16.4795	-11.5967	-15.564	-11.5967	-10.6812	-184.021	-195.923	-195.007	-197.449	-262.146	-260.01	-248.108	-183.716	-220.947	-210.876	-208.13
	15.1	-10.376	-11.2915	-12.8174	-12.5122	-18.6157	-10.9863	-15.564	-12.5122	-14.6484	-11.5967	-11.5967	-188.904	-193.481	-193.787	-194.702	-263.672	-260.62	-245.056	-185.242	-227.966	-207.214	-205.994
	15.2	-11.5967	-12.207	-13.1226	-12.5122	-16.1743	-10.0708	-16.4795	-14.0381	-15.2588	-11.9019	-12.5122	-186.462	-198.059	-192.261	-192.566	-263.367	-261.23	-244.446	-185.242	-227.051	-205.383	-206.604
	15.3	-12.5122	-12.207	-12.5122	-14.3433	-14.6484	-10.376	-15.8691	-10.9863	-15.8691	-11.5967	-12.207	-186.462	-198.364	-192.261	-191.04	-267.334	-265.503	-245.056	-181.274	-225.22	-207.214	-205.994
	15.4	-11.9019	-11.5967	-12.207	-14.0381	-13.7329	-11.9019	-14.9536	-10.0708	-16.7847	-9.46045	-11.9019	-191.65	-196.228	-192.566	-190.43	-270.691	-264.282	-244.446	-178.223	-222.168	-204.163	-204.163
	15.5	-10.6812	-11.9019	-12.5122	-13.7329	-14.6484	-13.7329	-13.4277	-13.1226	-16.4795	-9.76562	-11.2915	-199.28	-195.007	-195.312	-194.092	-265.198	-260.62	-244.141	-177.612	-222.473	-204.773	-202.942
	15.6	-11.9019	-9.46045	-12.207	-14.6484	-14.0381	-11.5967	-14.9536	-13.4277	-14.0381	-10.9863	-11.2915	-201.721	-195.007	-195.312	-197.144	-260.01	-256.653	-248.413	-175.171	-224.304	-203.552	-207.52
	15.7	-11.2915	-9.76562	-12.5122	-14.6484	-14.0381	-12.207	-15.2588	-10.9863	-14.6484	-12.207	-11.5967	-196.838	-194.092	-195.618	-198.059	-262.146	-254.822	-246.277	-173.95	-225.83	-203.857	-213.623
	15.8	-11.2915	-10.9863	-13.1226	-10.9863	-14.9536	-12.8174	-16.4795	-12.5122	-16.1743	-11.5967	-12.5122	-191.04	-194.092	-198.975	-193.176	-263.977	-255.737	-240.784	-175.476	-226.746	-206.299	-206.604
	15.9	-12.207	-11.9019	-13.1226	-11.9019	-14.3433	-12.207	-14.9536	-13.4277	-15.564	-12.5122	-10.0708	-180.969	-194.397	-198.669	-185.547	-270.081	-252.991	-240.784	-177.612	-225.525	-208.435	-200.806
	16	-13.7329	-12.207	-12.8174	-12.207	-14.0381	-10.6812	-15.2588	-12.5122	-14.9536	-12.8174	-10.6812	-175.476	-195.007	-193.787	-182.19	-274.353	-249.939	-245.972	-184.326	-225.525	-211.487	-198.669
	16.1	-12.207	-10.9863	-12.5122	-11.9019	-14.3433	-10.9863	-15.8691	-12.207	-14.6484	-12.207	-12.207	-173.645	-195.007	-189.514	-181.885	-276.489	-245.361	-247.192	-191.345	-224.304	-213.318	-201.416
	16.2	-11.9019	-11.2915	-13.7329	-12.207	-14.6484	-10.6812	-15.2588	-10.6812	-14.9536	-12.5122	-11.2915	-173.95	-191.65	-191.04	-184.937	-276.489	-242.92	-244.141	-187.378	-229.187	-212.708	-206.299
	16.3	-11.2915	-8.8501	-12.8174	-13.1226	-14.9536	-11.9019	-14.0381	-10.9863	-14.6484	-13.7329	-11.9019	-171.814	-191.65	-199.89	-184.937	-274.353	-244.751	-246.277	-180.054	-232.544	-209.656	-209.656
	16.4	-10.6812	-10.6812	-15.564	-11.9019	-15.2588	-13.4277	-12.5122	-12.207	-14.6484	-14.0381	-12.8174	-166.931	-192.261	-204.468	-187.683	-274.353	-245.972	-248.108	-178.833	-229.187	-207.52	-215.454
	16.5	-12.8174	-11.9019	-17.0898	-9.76562	-13.7329	-13.1226	-12.8174	-13.4277	-15.8691	-11.9019	-12.207	-163.879	-192.261	-195.312	-193.787	-269.165	-240.784	-247.498	-182.8	-225.22	-206.299	-218.201
	16.6	-10.9863	-13.4277	-18.9209	-9.76562	-11.5967	-11.9019	-10.0708	-13.7329	-15.8691	-10.0708	-13.1226	-162.048	-190.43	-187.683	-195.618	-267.334	-236.206	-250.244	-183.716	-222.778	-205.688	-214.233
	16.7	-10.0708	-14.0381	-15.564	-10.9863	-12.207	-10.0708	-9.46045	-12.207	-14.9536	-10.6812	-12.8174	-161.133	-188.293	-187.378	-193.176	-266.113	-237.427	-251.465	-181.274	-219.727	-202.332	-213.013
	16.8	-10.6812	-12.207	-13.1226	-12.8174	-13.7329	-11.5967	-11.9019	-10.0708	-13.7329	-11.2915	-11.9019	-161.438	-189.209	-188.599	-192.871	-263.672	-241.394	-248.718	-180.664	-211.182	-195.618	-213.318
	16.9	-10.9863	-11.5967	-12.207	-12.8174	-14.3433	-9.46045	-12.5122	-10.9863	-13.7329	-12.207	-13.1226	-162.659	-193.787	-193.787	-196.533	-260.315	-242.31	-245.667	-178.833	-205.078	-198.669	-210.571
	17	-10.6812	-12.5122	-11.9019	-12.5122	-12.8174	-10.6812	-12.207	-12.8174	-13.7329	-11.9019	-14.3433	-162.964	-194.092	-199.28	-201.111	-257.874	-244.446	-241.394	-180.054	-205.383	-201.111	-206.604
	17.1	-10.9863	-12.5122	-12.8174	-11.5967	-12.207	-11.5967	-12.207	-12.207	-14.6484	-13.4277	-14.6484	-163.879	-187.378	-200.5	-203.247	-256.042	-248.108	-235.291	-183.411	-216.675	-202.942	-202.942
	17.2	-11.2915	-14.0381	-12.8174	-10.9863	-11.9019	-10.9863	-12.207	-13.4277	-14.0381	-14.9536	-14.3433	-163.574	-187.378	-199.28	-202.332	-256.348	-252.686	-234.985	-180.969	-228.882	-202.332	-200.5
	17.3	-11.9019	-12.207	-11.9019	-13.1226	-13.1226	-10.9863	-11.9019	-12.8174	-13.7329	-13.7329	-12.207	-162.354	-194.092	-198.669	-203.857	-260.925	-251.16	-232.544	-179.749	-230.408	-198.364	-201.416
	17.4	-10.376	-9.15527	-10.6812	-14.9536	-13.4277	-13.4277	-12.5122	-14.6484	-14.9536	-12.8174	-10.6812	-166.321	-193.176	-198.669	-203.552	-262.146	-247.498	-230.713	-179.138	-225.525	-194.092	-200.5
	17.5	-10.0708	-7.01904	-11.9019	-14.0381	-16.1743	-13.4277	-11.5967	-12.8174	-15.8691	-12.5122	-10.0708	-174.255	-187.378	-196.838	-204.163	-256.348	-245.361	-233.459	-180.054	-225.22	-192.261	-199.28
	17.6	-10.0708	-9.76562	-11.9019	-14.0381	-16.4795	-13.4277	-11.2915	-12.207	-15.2588	-12.8174	-13.7329	-175.781	-188.599	-199.585	-206.909	-252.075	-240.784	-239.258	-182.19	-218.506	-198.669	-201.721
	17.7	-11.2915	-10.6812	-10.6812	-10.6812	-15.2588	-12.5122	-11.2915	-12.5122	-13.4277	-12.8174	-10.9863	-174.561	-189.209	-205.383	-214.539	-250.549	-236.511	-242.92	-180.054	-211.182	-203.857	-205.688
	17.8	-11.2915	-11.5967	-10.9863	-10.9863	-14.0381	-11.5967	-11.2915	-14.3433	-15.8691	-13.7329	-11.9019	-174.255	-184.326	-202.942	-215.454	-256.348	-237.427	-244.751	-178.528	-214.233	-205.994	-208.435
	17.9	-12.5122	-10.9863	-14.0381	-12.207	-14.3433	-10.376	-11.5967	-12.5122	-15.2588	-14.6484	-10.9863	-171.204	-188.904	-197.754	-211.182	-255.432	-236.206	-241.089	-177.307	-219.116	-204.468	-212.097
	18	-11.2915	-10.6812	-12.8174	-12.5122	-14.3433	-9.76562	-11.9019	-11.9019	-14.6484	-14.0381	-10.0708	-170.288	-191.04	-197.449	-208.13	-248.718	-238.342	-242.31	-177.002	-224.915	-200.5	-217.285
	18.1	-11.2915	-11.5967	-12.5122	-12.8174	-14.3433	-10.6812	-12.207	-11.5967	-14.6484	-14.0381	-9.76562	-171.204	-190.125	-200.806	-206.604	-247.803	-239.868	-246.582	-174.561	-226.746	-196.838	-219.116
	18.2	-9.46045	-12.8174	-13.7329	-13.7329	-14.9536	-10.9863	-13.4277	-11.9019	-14.9536	-13.4277	-12.5122	-166.321	-189.819	-204.163	-209.656	-240.784	-240.173	-249.023	-171.814	-222.168	-196.228	-220.642
	18.3	-11.2915	-10.376	-13.4277	-14.0381	-13.7329	-11.2915	-11.5967	-12.8174	-13.4277	-14.0381	-14.3433	-163.879	-189.514	-204.773	-206.299	-235.596	-238.953	-254.822	-169.373	-222.168	-197.449	-223.694
	18.4	-10.0708	-10.6812	-13.7329	-11.2915	-14.3433	-10.9863	-11.9019	-14.6484	-13.7329	-13.1226	-14.0381	-164.795	-190.125	-201.111	-198.975	-235.596	-234.07	-256.042	-166.321	-224.609	-200.5	-226.135
	18.5	-10.6812	-12.5122	-14.3433	-9.76562	-14.6484	-11.9019	-13.7329	-14.9536	-13.4277	-12.207	-11.9019	-166.016	-195.312	-201.111	-197.449	-236.511	-233.765	-252.686	-169.678	-222.778	-201.416	-233.765
	18.6	-15.8691	-13.4277	-17.0898	-10.376	-14.3433	-11.2915	-14.9536	-11.9019	-12.8174	-12.8174	-9.46045	-166.931	-198.669	-198.975	-203.857	-236.816	-233.765	-254.211	-172.424	-217.59	-198.364	-232.849
	18.7	-14.3433	-10.9863	-17.395	-11.5967	-14.0381	-11.9019	-14.6484	-12.8174	-15.8691	-12.207	-9.76562	-168.152	-207.825	-196.228	-213.623	-243.225	-231.628	-245.361	-175.171	-216.064	-201.111	-230.408
	18.8	-12.5122	-9.76562	-16.4795	-12.207	-14.6484	-12.8174	-16.1743	-13.7329	-14.0381	-10.9863	-12.207	-169.983	-209.656	-193.176	-222.168	-250.244	-231.323	-235.901	-181.274	-213.623	-203.247	-232.239
	18.9	-13.4277	-9.46045	-14.3433	-11.2915	-14.3433	-12.5122	-16.1743	-11.2915	-10.9863	-13.4277	-12.5122	-174.255	-201.111	-195.618	-224.609	-248.413	-233.459	-237.732	-185.242	-207.825	-203.552	-233.765
	19	-11.5967	-10.0708	-13.4277	-10.9863	-14.9536	-11.9019	-16.7847	-10.6812	-12.5122	-13.4277	-10.6812	-177.307	-196.838	-198.059	-216.675	-245.056	-238.037	-243.53	-186.768	-205.078	-205.078	-230.713
	19.1	-11.9019	-10.376	-14.0381	-14.0381	-14.3433	-11.5967	-16.1743	-12.207	-12.5122	-13.4277	-11.5967	-180.359	-199.28	-200.806	-212.402	-242.92	-235.901	-237.427	-180.969	-203.857	-199.89	-226.746
	19.2	-11.5967	-12.5122	-14.9536	-16.4795	-12.207	-11.9019	-15.8691	-12.207	-13.7329	-11.9019	-11.2915	-176.697	-203.247	-200.5	-214.539	-243.225	-233.459	-228.882	-174.561	-204.468	-195.618	-225.22
	19.3	-14.3433	-13.4277	-14.6484	-15.2588	-11.9019	-10.6812	-15.564	-12.5122	-14.9536	-9.76562	-12.5122	-172.119	-200.806	-200.806	-216.675	-242.615	-229.492	-226.746	-173.95	-209.351	-195.007	-225.22
	19.4	-10.0708	-11.9019	-13.7329	-13.4277	-12.207	-11.2915	-16.1743	-13.7329	-15.2588	-12.207	-11.2915	-172.119	-195.312	-203.857	-212.097	-243.225	-223.999	-231.934	-175.781	-213.623	-198.975	-220.947
	19.5	-9.76562	-9.46045	-12.8174	-14.0381	-11.9019	-10.376	-15.2588	-12.5122	-14.0381	-14.9536	-10.9863	-179.138	-195.007	-200.806	-212.097	-248.718	-223.389	-234.375	-181.885	-211.792	-203.247	-216.675
	19.6	-11.2915	-9.15527	-12.5122	-13.7329	-11.2915	-12.207	-14.3433	-12.5122	-13.7329	-13.4277	-11.5967	-184.021	-195.007	-195.007	-216.37	-255.432	-222.778	-238.342	-192.871	-208.435	-213.318	-215.149
	19.7	-13.1226	-9.76562	-13.4277	-12.8174	-12.5122	-12.207	-14.6484	-12.5122	-13.1226	-13.7329	-12.207	-185.852	-194.702	-194.092	-215.149	-263.367	-225.22	-241.394	-194.397	-208.74	-219.727	-217.285
	19.8	-12.8174	-10.9863	-12.8174	-14.3433	-13.4277	-10.376	-15.8691	-12.5122	-14.6484	-14.0381	-13.4277	-192.566	-197.144	-191.65	-211.182	-269.775	-231.628	-244.141	-184.631	-212.402	-213.623	-223.999
	19.9	-14.3433	-14.0381	-12.8174	-14.3433	-13.4277	-8.8501	-16.7847	-11.5967	-16.1743	-12.207	-11.9019	-196.228	-199.89	-190.735	-210.571	-262.146	-236.816	-245.361	-180.054	-213.318	-209.045	-230.408
	20	-12.207	-12.5122	-13.4277	-16.4795	-13.1226	-9.46045	-14.9536	-11.2915	-17.0898	-12.207	-10.6812	-194.702	-204.468	-195.618	-214.844	-259.705	-236.511	-250.854	-180.969	-215.149	-209.656	-234.07
	20.1	-9.15527	-10.9863	-12.8174	-16.4795	-12.207	-10.9863	-15.8691	-10.9863	-16.1743	-11.9019	-12.8174	-191.345	-206.604	-198.059	-213.928	-261.536	-233.154	-252.075	-186.462	-221.863	-205.383	-231.934
	20.2	-11.5967	-10.6812	-10.6812	-12.8174	-12.5122	-11.5967	-16.4795	-9.76562	-16.1743	-12.5122	-13.4277	-189.819	-204.773	-198.059	-211.487	-260.925	-231.628	-245.056	-189.514	-227.051	-204.163	-228.271
	20.3	-11.2915	-10.9863	-13.4277	-12.8174	-13.7329	-10.9863	-16.4795	-10.9863	-14.3433	-13.7329	-12.8174	-191.04	-199.89	-198.669	-213.623	-256.348	-234.375	-236.206	-188.904	-225.22	-202.332	-225.83
	20.4	-10.376	-11.9019	-14.6484	-14.0381	-14.6484	-8.54492	-12.8174	-12.5122	-13.4277	-13.4277	-12.8174	-192.566	-194.092	-200.5	-218.811	-252.991	-233.459	-233.765	-194.397	-219.421	-195.312	-220.032
	20.5	-11.5967	-12.5122	-13.7329	-14.6484	-12.8174	-7.62939	-12.8174	-15.564	-15.564	-11.9019	-14.6484	-191.345	-191.04	-194.702	-217.285	-256.348	-228.271	-238.953	-198.364	-220.642	-192.566	-216.98
	20.6	-10.376	-14.0381	-14.3433	-14.0381	-12.5122	-9.15527	-12.5122	-13.4277	-16.4795	-11.9019	-14.6484	-191.956	-188.599	-190.125	-213.318	-263.672	-233.154	-242.92	-198.669	-218.201	-194.702	-216.675
	20.7	-11.5967	-12.8174	-13.7329	-15.564	-12.5122	-9.46045	-12.207	-11.5967	-16.7847	-12.5122	-12.207	-189.209	-190.125	-193.176	-212.402	-260.925	-237.732	-246.582	-194.092	-216.064	-195.312	-218.811
	20.8	-10.0708	-12.5122	-11.9019	-14.6484	-14.9536	-11.2915	-13.4277	-11.2915	-15.2588	-12.8174	-11.2915	-184.937	-190.735	-197.754	-208.13	-250.549	-237.122	-248.413	-192.566	-214.233	-194.702	-222.778
	20.9	-10.6812	-11.5967	-12.5122	-12.8174	-15.8691	-12.8174	-10.6812	-11.2915	-15.8691	-14.3433	-10.9863	-179.749	-194.702	-194.397	-205.688	-244.446	-227.661	-246.887	-191.04	-210.571	-199.585	-226.746
	21	-7.93457	-11.5967	-13.4277	-14.0381	-14.3433	-12.5122	-10.376	-12.5122	-14.3433	-13.7329	-10.376	-179.749	-197.144	-189.209	-201.721	-237.427	-218.506	-245.361	-191.345	-206.604	-206.909	-227.356
	21.1	-10.0708	-13.4277	-12.207	-13.4277	-14.6484	-11.2915	-12.8174	-14.6484	-17.7002	-13.7329	-12.8174	-184.631	-198.364	-189.514	-198.364	-234.985	-217.285	-244.751	-191.65	-205.688	-211.487	-227.966
	21.2	-14.0381	-12.8174	-11.2915	-13.7329	-14.3433	-12.5122	-14.9536	-14.6484	-16.4795	-12.5122	-11.5967	-189.209	-203.552	-191.04	-198.364	-243.53	-225.525	-246.887	-194.397	-206.604	-208.435	-228.882
	21.3	-12.207	-14.0381	-11.5967	-12.5122	-13.4277	-13.1226	-14.0381	-15.2588	-14.3433	-13.4277	-9.46045	-191.65	-206.604	-196.228	-200.5	-253.601	-232.544	-249.329	-195.618	-202.942	-204.163	-226.746
	21.4	-8.8501	-13.7329	-11.9019	-13.7329	-12.5122	-13.4277	-13.4277	-14.9536	-14.0381	-11.2915	-9.15527	-188.599	-204.773	-195.923	-205.383	-255.432	-238.953	-251.465	-193.481	-200.5	-200.5	-226.44
	21.5	-10.376	-13.4277	-12.8174	-14.9536	-15.2588	-12.207	-12.5122	-12.207	-13.7329	-10.9863	-10.9863	-186.462	-206.299	-193.787	-210.876	-250.854	-240.173	-252.991	-187.378	-202.332	-203.857	-224.304
	21.6	-11.5967	-14.0381	-12.5122	-14.6484	-16.1743	-12.207	-12.5122	-10.9863	-14.3433	-10.0708	-12.207	-187.073	-205.078	-194.702	-211.487	-252.38	-238.342	-251.77	-186.768	-206.299	-203.552	-225.525
	21.7	-13.7329	-12.5122	-14.0381	-16.4795	-17.0898	-10.9863	-12.207	-12.5122	-14.0381	-14.0381	-11.9019	-189.209	-207.52	-192.566	-216.675	-258.179	-243.53	-248.718	-189.209	-210.266	-198.364	-228.882
	21.8	-13.7329	-12.207	-14.6484	-16.7847	-12.8174	-9.76562	-11.5967	-14.0381	-14.6484	-15.2588	-10.9863	-188.293	-212.708	-189.514	-216.064	-260.315	-244.446	-249.023	-186.462	-209.656	-194.397	-228.882
	21.9	-10.0708	-13.7329	-14.9536	-13.7329	-10.6812	-8.8501	-11.9019	-12.8174	-14.3433	-10.6812	-9.46045	-184.631	-208.74	-187.378	-211.182	-258.179	-243.225	-251.465	-187.073	-209.656	-192.261	-228.271
	22	-10.376	-14.3433	-14.0381	-12.8174	-12.8174	-11.9019	-12.8174	-12.5122	-14.0381	-9.46045	-11.5967	-185.852	-205.688	-187.683	-207.214	-257.874	-242.615	-251.77	-188.293	-211.182	-188.293	-231.628
	22.1	-10.6812	-14.0381	-13.7329	-14.0381	-14.9536	-12.207	-11.9019	-10.376	-10.376	-10.6812	-10.9863	-188.904	-203.247	-188.293	-206.299	-257.568	-247.192	-250.854	-190.735	-211.792	-191.65	-234.68
	22.2	-11.2915	-12.5122	-11.5967	-14.6484	-14.9536	-10.9863	-12.207	-12.5122	-11.5967	-11.9019	-10.376	-194.092	-201.721	-185.547	-213.318	-255.432	-248.108	-248.108	-191.956	-215.149	-198.669	-231.934
	22.3	-14.6484	-10.9863	-10.376	-14.0381	-13.1226	-11.2915	-12.5122	-12.8174	-14.3433	-14.3433	-12.5122	-197.144	-197.754	-181.58	-215.759	-253.906	-243.225	-248.108	-189.209	-219.727	-200.195	-231.934
	22.4	-17.0898	-11.2915	-12.8174	-14.6484	-11.2915	-9.15527	-11.9019	-11.5967	-12.8174	-14.6484	-12.8174	-199.28	-196.838	-183.105	-216.37	-250.549	-241.089	-248.413	-184.326	-222.778	-199.28	-233.459
	22.5	-11.2915	-12.5122	-14.6484	-12.8174	-13.1226	-9.76562	-12.207	-11.5967	-10.376	-12.207	-9.76562	-195.618	-198.669	-186.768	-208.74	-251.465	-244.141	-243.835	-181.885	-222.473	-196.838	-231.018
	22.6	-13.4277	-11.2915	-15.8691	-13.1226	-14.9536	-11.2915	-12.207	-10.6812	-11.5967	-11.5967	-9.15527	-193.176	-198.059	-186.768	-202.332	-256.653	-243.835	-243.835	-182.495	-218.201	-193.481	-231.323
	22.7	-13.7329	-10.376	-14.3433	-13.7329	-12.207	-12.8174	-9.76562	-11.2915	-12.8174	-11.5967	-11.9019	-192.261	-196.838	-184.631	-202.332	-261.23	-243.53	-246.277	-186.768	-215.759	-193.481	-230.103
	22.8	-15.2588	-10.9863	-13.7329	-13.4277	-10.9863	-12.207	-11.2915	-12.207	-13.1226	-10.0708	-12.207	-189.819	-195.923	-188.904	-198.669	-260.62	-244.446	-248.718	-186.157	-214.539	-194.397	-227.356
	22.9	-12.5122	-10.9863	-10.376	-10.376	-10.9863	-12.8174	-11.5967	-12.207	-13.1226	-11.9019	-10.9863	-188.904	-201.111	-190.125	-197.449	-257.874	-242.004	-254.517	-184.021	-215.454	-190.735	-230.103
	23	-12.5122	-10.376	-11.2915	-13.1226	-11.2915	-11.2915	-10.9863	-11.5967	-11.2915	-12.207	-11.5967	-186.768	-208.13	-192.566	-197.754	-262.451	-242.31	-260.01	-183.716	-213.318	-190.735	-231.018
	23.1	-10.376	-10.6812	-14.0381	-14.0381	-11.5967	-11.2915	-11.5967	-9.76562	-11.5967	-15.2588	-11.2915	-187.378	-211.182	-190.735	-201.416	-258.789	-242.615	-256.958	-180.359	-212.402	-189.819	-232.239
	23.2	-12.8174	-10.0708	-12.8174	-12.5122	-10.376	-11.9019	-12.5122	-10.376	-12.5122	-13.7329	-12.8174	-189.209	-209.351	-188.904	-204.773	-250.244	-242.31	-252.686	-178.528	-212.402	-186.768	-229.797
	23.3	-16.4795	-10.376	-11.2915	-10.9863	-10.6812	-10.0708	-10.9863	-9.76562	-12.207	-14.0381	-11.9019	-189.819	-207.214	-185.852	-203.552	-246.582	-241.394	-256.348	-176.086	-210.876	-186.462	-231.018
	23.4	-14.6484	-12.8174	-12.207	-12.8174	-10.6812	-8.54492	-12.5122	-10.376	-11.9019	-14.3433	-10.9863	-189.209	-205.078	-185.547	-206.299	-244.141	-242.615	-260.315	-173.035	-209.045	-191.956	-231.323
	23.5	-15.2588	-12.207	-11.9019	-14.3433	-11.9019	-9.76562	-14.0381	-12.207	-12.207	-13.4277	-9.46045	-189.514	-203.857	-183.716	-209.656	-235.596	-232.849	-260.315	-171.509	-208.435	-199.28	-231.018
	23.6	-13.4277	-10.376	-13.4277	-15.2588	-12.207	-12.207	-11.2915	-12.207	-14.0381	-14.0381	-9.76562	-193.787	-197.754	-185.547	-210.266	-233.765	-226.44	-256.348	-171.814	-205.688	-199.89	-227.966
	23.7	-14.6484	-8.8501	-13.4277	-14.9536	-11.5967	-11.9019	-10.0708	-11.2915	-14.6484	-14.9536	-12.207	-196.228	-192.566	-188.904	-206.299	-234.985	-227.966	-256.042	-182.8	-203.552	-200.806	-225.22
	23.8	-13.7329	-7.62939	-14.0381	-14.9536	-12.5122	-11.2915	-11.5967	-11.2915	-15.8691	-15.564	-11.9019	-198.059	-195.618	-190.43	-202.637	-242.615	-235.596	-254.211	-191.345	-200.5	-201.111	-223.083
	23.9	-15.8691	-8.54492	-15.2588	-14.6484	-13.4277	-7.93457	-12.207	-13.1226	-14.6484	-14.9536	-10.0708	-201.721	-195.923	-202.942	-202.637	-251.465	-240.173	-253.906	-191.65	-199.585	-205.078	-217.285
	24	-16.4795	-10.376	-15.564	-12.8174	-11.9019	-9.15527	-10.376	-14.0381	-14.9536	-13.1226	-10.0708	-205.078	-193.176	-210.571	-206.299	-259.705	-241.394	-256.653	-191.345	-202.637	-206.604	-216.37
	24.1	-14.6484	-10.9863	-12.5122	-11.9019	-11.5967	-9.46045	-10.0708	-12.207	-14.3433	-13.7329	-10.6812	-201.416	-189.514	-205.078	-210.876	-256.653	-241.089	-258.789	-196.533	-204.468	-199.28	-219.727
	24.2	-13.7329	-10.376	-13.4277	-13.7329	-11.5967	-9.76562	-9.46045	-11.2915	-14.6484	-13.4277	-12.207	-196.838	-189.819	-197.449	-211.792	-260.315	-235.291	-263.977	-203.552	-204.468	-194.397	-222.168
	24.3	-12.5122	-11.2915	-12.5122	-13.1226	-14.6484	-9.46045	-10.376	-10.6812	-12.5122	-14.0381	-13.1226	-195.618	-187.073	-198.059	-215.454	-256.348	-233.154	-263.367	-202.942	-209.045	-195.007	-219.727
	24.4	-9.76562	-9.76562	-14.6484	-11.5967	-15.8691	-10.0708	-9.15527	-10.376	-12.8174	-14.6484	-14.6484	-196.228	-184.937	-196.228	-221.252	-253.601	-234.68	-262.146	-198.059	-215.759	-197.144	-220.337
	24.5	-1931.76	-1648.25	-1357.73	-1050.72	-743.103	-443.115	-131.836	177.307	477.6	773.01	1070.86	-1484.99	-1266.48	-1089.78	-951.843	-767.822	-542.908	-353.394	-50.6592	148.926	385.437	591.125
	24.6	-7774.96	-6628.72	-5453.8	-4241.33	-3023.07	-1789.25	-524.902	760.498	2008.67	3229.68	4460.14	-5789.18	-4916.69	-4103.39	-3350.52	-2470.4	-1551.21	-650.024	404.968	1336.98	2283.94	3208.31
	24.7	-9519.35	-8083.19	-6618.04	-5126.04	-3641.36	-2129.82	-618.896	899.353	2406.31	3904.72	5428.47	-8046.88	-6837.16	-5640.87	-4458.62	-3237.61	-1985.17	-770.569	578.613	1813.96	3072.2	4280.7
	24.8	-7931.82	-6710.82	-5476.68	-4231.26	-2995.91	-1738.89	-501.709	726.318	1964.72	3215.03	4487.3	-7576.29	-6451.72	-5292.36	-4112.55	-2975.16	-1818.54	-711.975	488.586	1598.21	2732.54	3790.59
	24.9	-6070.86	-5123.6	-4175.42	-3228.15	-2280.58	-1324.77	-383.911	546.875	1488.34	2445.98	3412.17	-6159.97	-5266.42	-4330.44	-3357.85	-2435.3	-1505.74	-619.202	348.511	1222.84	2125.85	2930.91
	25	-4674.38	-3938.6	-3207.7	-2480.16	-1751.71	-1019.9	-297.546	417.175	1135.86	1873.17	2607.12	-4787.29	-4107.97	-3398.44	-2653.5	-1932.98	-1214.29	-540.771	221.558	883.484	1575.62	2149.05
	25.1	-3605.96	-3032.53	-2469.18	-1908.26	-1349.18	-784.607	-231.018	316.467	867.92	1435.85	1995.54	-3643.49	-3144.84	-2615.66	-2061.77	-1513.06	-969.849	-471.802	112.915	606.995	1112.67	1485.6
	25.2	-2770.39	-2324.22	-1890.56	-1461.18	-1034.85	-601.196	-179.138	237.427	657.654	1095.28	1519.78	-2731.02	-2374.88	-1986.69	-1580.81	-1172.49	-774.841	-411.072	26.8555	380.859	733.032	952.148
	25.3	-2123.72	-1778.26	-1445.01	-1117.86	-791.321	-461.121	-139.771	177.612	497.131	829.163	1156.31	-2018.74	-1766.36	-1494.14	-1203.61	-905.457	-622.253	-366.821	-32.6538	192.566	438.232	538.025
	25.4	-1621.7	-1357.73	-1102.29	-856.628	-604.553	-354.309	-108.337	131.531	373.23	627.747	878.296	-1463.62	-1296.39	-1112.37	-910.339	-699.463	-503.845	-335.083	-74.1577	47.9126	215.454	221.863
	25.5	-1238.1	-1034.24	-840.149	-650.635	-463.562	-273.132	-86.0596	97.0459	278.32	474.854	663.147	-1038.51	-938.721	-818.176	-686.035	-542.908	-409.851	-305.481	-113.831	-57.9834	53.4058	-21.0571
	25.6	-941.162	-789.185	-640.259	-496.216	-356.445	-212.097	-65.918	71.7163	206.909	357.666	496.826	-701.599	-666.809	-594.788	-516.663	-421.448	-341.797	-281.982	-146.484	-134.583	-68.9697	-206.604
	25.7	-714.111	-599.365	-488.586	-378.113	-271.301	-160.217	-50.9644	51.8799	152.283	264.587	366.516	-442.2	-455.627	-426.941	-386.353	-327.454	-282.898	-267.639	-170.288	-191.04	-166.626	-344.849
	25.8	-541.077	-454.407	-370.789	-287.476	-205.994	-120.85	-40.2832	33.2642	110.474	194.397	270.691	-245.361	-295.715	-298.157	-283.508	-252.686	-239.258	-257.568	-186.768	-232.849	-247.498	-458.984
	25.9	-407.41	-340.881	-280.457	-218.201	-156.86	-93.0786	-33.8745	21.0571	77.5146	140.686	199.585	-90.332	-166.626	-193.787	-203.857	-196.228	-203.857	-251.77	-197.144	-262.146	-314.026	-539.856
	26	-303.955	-256.958	-211.182	-165.71	-118.103	-72.6318	-29.6021	10.0708	51.2695	98.5718	143.433	31.1279	-67.1387	-113.22	-142.822	-158.081	-181.58	-245.056	-207.214	-291.138	-360.413	-597.839
	26.1	-225.22	-190.43	-157.471	-127.258	-92.4683	-54.6265	-24.4141	3.96729	32.0435	68.3594	99.7925	115.967	7.93457	-57.6782	-97.9614	-127.258	-167.542	-236.206	-223.999	-316.772	-389.709	-645.752
	26.2	-162.048	-140.076	-117.798	-94.9097	-69.2749	-43.6401	-20.1416	-0.305176	19.8364	43.9453	66.5283	176.086	65.0024	-13.4277	-64.3921	-100.098	-150.757	-233.154	-234.985	-330.505	-413.818	-692.444
	26.3	-116.882	-99.7925	-84.5337	-69.8853	-51.5747	-36.6211	-17.7002	-3.05176	8.54492	23.1934	39.3677	230.103	112.61	20.4468	-34.79	-79.9561	-137.939	-227.661	-239.868	-339.05	-447.693	-732.117
	26.4	-87.5854	-70.1904	-58.5938	-49.4385	-39.3677	-28.9917	-17.0898	-6.10352	-1.83105	10.0708	19.5312	273.743	146.179	50.0488	-11.9019	-67.1387	-126.953	-221.863	-242.31	-347.595	-480.042	-776.672
	26.5	-59.2041	-48.2178	-42.7246	-37.5366	-27.771	-25.0244	-14.9536	-10.0708	-9.76562	0.610352	6.40869	303.04	165.1	75.0732	3.05176	-56.1523	-122.07	-219.421	-240.479	-354.919	-503.845	-808.411
	26.6	-34.4849	-31.7383	-28.6865	-26.8555	-18.9209	-19.2261	-14.3433	-11.5967	-15.8691	-9.76562	-3.05176	322.876	180.969	87.2803	14.3433	-48.2178	-122.681	-220.947	-237.122	-351.257	-516.052	-828.857
	26.7	-18.6157	-19.2261	-17.7002	-18.9209	-14.6484	-14.0381	-12.207	-11.9019	-19.8364	-14.0381	-15.2588	335.999	192.871	90.9424	22.8882	-41.5039	-119.324	-220.642	-235.291	-348.511	-517.883	-832.52
	26.8	-7.01904	-6.40869	-7.93457	-12.207	-10.9863	-12.5122	-11.9019	-10.0708	-23.4985	-19.8364	-21.6675	344.849	200.195	94.2993	28.0762	-35.7056	-111.084	-215.149	-234.375	-346.375	-513	-820.007
	26.9	2.44141	-0.305176	-1.52588	-8.54492	-7.93457	-11.2915	-11.5967	-13.7329	-25.0244	-27.1606	-25.3296	350.647	206.604	99.7925	34.79	-35.0952	-108.643	-210.266	-227.966	-351.562	-515.747	-812.683
	27	10.6812	5.49316	3.35693	-2.44141	-4.27246	-7.62939	-12.5122	-14.0381	-26.2451	-29.6021	-29.6021	347.595	216.37	109.253	40.5884	-31.7383	-110.168	-210.571	-220.947	-354.309	-521.24	-815.43
	27.1	15.8691	9.76562	4.57764	-0.610352	-2.74658	-6.40869	-10.6812	-14.9536	-26.2451	-32.6538	-31.4331	346.069	229.797	119.019	42.1143	-31.4331	-109.558	-215.759	-223.083	-355.835	-525.513	-817.566
	27.2	19.8364	13.1226	5.18799	0.915527	-2.13623	-3.96729	-9.46045	-14.9536	-30.8228	-32.959	-33.8745	345.764	235.596	122.07	42.1143	-31.1279	-108.948	-219.116	-229.187	-351.257	-525.208	-806.885
	27.3	20.752	14.0381	8.54492	4.57764	-1.2207	-4.27246	-11.5967	-15.2588	-33.2642	-35.0952	-35.4004	341.187	237.122	126.953	46.0815	-29.6021	-109.863	-215.759	-232.849	-346.375	-517.578	-801.086
	27.4	27.1606	18.0054	10.376	4.57764	1.2207	-3.05176	-12.207	-17.395	-32.0435	-37.8418	-37.2314	338.135	240.479	130.92	48.8281	-26.5503	-111.389	-212.097	-232.239	-347.29	-516.052	-811.462
	27.5	27.4658	21.0571	10.9863	3.96729	0.610352	-1.2207	-12.8174	-17.0898	-32.3486	-42.7246	-37.5366	339.355	241.089	130.005	50.0488	-25.9399	-109.863	-214.233	-234.07	-351.868	-517.578	-815.125
	27.6	25.9399	22.8882	13.4277	3.05176	1.52588	-1.83105	-12.207	-16.7847	-32.0435	-43.9453	-36.9263	350.952	238.953	126.953	50.9644	-27.4658	-102.844	-217.896	-235.291	-343.628	-517.578	-817.261
	27.7	29.2969	21.0571	14.9536	4.88281	2.44141	-3.35693	-11.9019	-15.8691	-32.6538	-43.9453	-38.4521	368.042	238.953	127.563	51.2695	-27.4658	-98.2666	-218.506	-235.596	-343.323	-510.559	-831.604
	27.8	28.6865	21.6675	14.3433	6.10352	2.44141	-3.66211	-12.207	-18.9209	-36.0107	-41.8091	-42.7246	371.399	236.511	135.193	51.5747	-26.2451	-99.1821	-217.59	-236.206	-353.088	-511.475	-853.882
	27.9	30.2124	21.9727	12.8174	7.01904	2.13623	-1.83105	-13.7329	-20.4468	-36.3159	-39.3677	-44.5557	367.432	233.154	137.939	53.1006	-23.4985	-101.624	-215.759	-235.901	-362.549	-513.611	-867.92
	28	32.959	21.6675	12.5122	6.71387	3.05176	-0.610352	-11.2915	-17.7002	-35.7056	-37.5366	-44.5557	365.295	229.187	139.771	52.7954	-21.6675	-100.708	-218.811	-237.732	-365.601	-525.208	-864.868
	28.1	32.3486	22.583	14.3433	5.49316	3.05176	-1.83105	-10.0708	-15.2588	-35.0952	-36.0107	-46.9971	368.042	230.713	138.245	52.1851	-20.752	-102.844	-219.116	-244.751	-371.704	-541.382	-847.168
	28.2	32.6538	21.9727	14.6484	7.32422	3.66211	-3.96729	-9.76562	-15.2588	-34.4849	-36.6211	-43.9453	371.399	229.492	138.55	51.5747	-22.8882	-98.877	-210.876	-256.042	-375.977	-550.232	-845.947
	28.3	35.0952	22.583	14.3433	7.93457	1.2207	-3.96729	-8.54492	-18.9209	-31.4331	-36.3159	-45.4712	370.483	238.037	138.245	51.5747	-24.7192	-97.3511	-209.656	-260.925	-374.451	-546.265	-868.225
	28.4	29.6021	24.1089	14.3433	7.62939	1.2207	-0.610352	-10.0708	-20.1416	-31.7383	-38.147	-48.2178	357.971	244.751	136.108	52.1851	-23.4985	-97.6562	-209.961	-259.094	-375.671	-540.466	-882.568
	28.5	28.0762	23.4985	12.5122	6.10352	0	-1.83105	-11.5967	-17.7002	-33.5693	-39.0625	-49.1333	353.394	242.615	135.803	51.5747	-22.583	-98.5718	-209.351	-256.958	-371.704	-536.194	-880.127
	28.6	31.1279	23.1934	14.3433	5.79834	1.2207	-1.52588	-13.4277	-17.395	-33.5693	-37.5366	-48.2178	360.413	241.394	133.362	50.9644	-26.2451	-99.7925	-212.402	-260.01	-368.652	-533.752	-881.653
	28.7	32.959	22.8882	16.1743	6.10352	2.74658	-1.52588	-14.0381	-16.1743	-34.1797	-34.4849	-50.354	370.178	241.089	129.7	51.5747	-26.8555	-99.4873	-207.52	-259.094	-364.99	-525.208	-886.23
	28.8	29.6021	25.3296	16.4795	5.79834	2.74658	-3.66211	-14.9536	-14.6484	-31.7383	-33.8745	-48.5229	375.061	236.206	131.226	50.6592	-23.4985	-98.2666	-197.449	-255.737	-364.38	-521.851	-883.179
	28.9	30.8228	25.3296	14.3433	5.18799	2.13623	-3.96729	-11.2915	-14.9536	-33.2642	-36.0107	-47.9126	373.535	234.985	134.888	50.0488	-19.8364	-98.5718	-195.618	-257.568	-364.685	-526.123	-866.394
	29	32.3486	23.8037	13.4277	7.62939	1.83105	-3.96729	-10.376	-14.9536	-32.3486	-36.0107	-50.354	368.347	237.122	134.888	47.6074	-20.1416	-97.3511	-202.332	-259.705	-364.38	-533.142	-854.492
	29.1	31.4331	23.1934	14.6484	9.46045	1.83105	-3.66211	-9.76562	-17.7002	-30.5176	-36.0107	-49.4385	366.211	236.816	136.108	47.3022	-21.3623	-100.098	-204.163	-259.705	-373.23	-534.973	-849.304
	29.2	32.0435	23.1934	14.3433	7.32422	2.13623	-1.83105	-10.6812	-19.5312	-27.771	-35.0952	-50.6592	364.38	235.596	138.245	46.3867	-21.3623	-101.013	-199.585	-256.958	-379.333	-542.908	-833.74
	29.3	32.0435	22.2778	12.207	6.71387	1.2207	-1.52588	-10.9863	-19.8364	-27.771	-34.79	-52.1851	361.328	231.628	139.771	47.9126	-22.2778	-101.318	-199.585	-256.958	-376.282	-554.81	-802.917
	29.4	32.6538	23.4985	12.207	4.27246	0.305176	-4.27246	-10.376	-17.7002	-28.9917	-36.0107	-51.2695	358.276	232.849	139.771	48.5229	-22.8882	-102.539	-200.195	-256.348	-368.652	-564.27	-774.231
	29.5	34.79	23.4985	14.6484	3.66211	-0.610352	-4.27246	-7.93457	-18.6157	-28.9917	-36.3159	-48.5229	361.938	236.816	136.108	48.5229	-23.4985	-105.591	-199.585	-256.958	-368.347	-562.744	-763.245
	29.6	32.3486	21.6675	14.3433	5.18799	-0.610352	-2.44141	-8.23975	-17.7002	-26.5503	-35.7056	-49.7437	364.685	239.563	132.141	49.4385	-22.2778	-106.506	-199.585	-253.601	-371.399	-551.147	-767.822
	29.7	27.4658	20.1416	14.0381	6.71387	1.2207	-1.83105	-9.46045	-17.0898	-25.0244	-39.0625	-51.2695	372.62	233.459	132.446	47.3022	-20.4468	-100.708	-199.89	-250.244	-374.756	-536.194	-777.893
	29.8	33.2642	20.4468	14.3433	5.79834	0.915527	-3.05176	-7.32422	-18.9209	-24.4141	-40.8936	-51.8799	378.418	228.882	136.719	48.8281	-22.2778	-98.877	-203.247	-249.329	-379.028	-531.006	-796.509
	29.9	32.959	20.752	14.6484	6.10352	1.52588	-1.83105	-9.76562	-18.6157	-27.4658	-39.3677	-50.6592	378.418	233.459	137.939	49.1333	-22.583	-101.929	-205.688	-249.329	-386.963	-533.752	-831.299
	30	31.7383	22.2778	14.0381	8.54492	0.915527	-1.52588	-12.207	-15.8691	-25.0244	-38.7573	-48.8281	373.84	236.511	135.498	47.6074	-21.9727	-101.929	-205.078	-245.667	-389.099	-538.94	-860.901
	30.1	33.2642	23.1934	13.1226	7.93457	1.2207	-3.35693	-12.207	-15.2588	-23.1934	-36.9263	-52.7954	368.042	239.563	138.245	50.354	-21.6675	-106.506	-201.111	-248.413	-382.69	-541.382	-863.037
	30.2	32.3486	22.583	15.2588	5.79834	-0.305176	-3.66211	-12.5122	-17.7002	-24.7192	-39.6729	-51.8799	367.737	236.816	137.634	52.4902	-21.3623	-112.61	-196.533	-252.38	-373.535	-542.297	-838.318
	30.3	29.9072	23.8037	13.7329	3.05176	0.610352	-3.05176	-10.6812	-16.4795	-25.9399	-41.5039	-51.2695	371.094	237.122	135.803	52.1851	-25.3296	-114.441	-197.449	-251.16	-369.873	-545.959	-821.228
	30.4	30.8228	23.4985	13.1226	5.49316	2.44141	-3.05176	-9.46045	-17.0898	-25.0244	-42.1143	-52.7954	372.009	235.291	137.939	51.2695	-26.2451	-112.305	-198.669	-246.887	-367.432	-531.006	-830.688
	30.5	30.8228	24.4141	15.564	6.10352	2.13623	-3.96729	-10.376	-17.0898	-24.7192	-39.978	-51.8799	371.094	229.492	137.939	49.7437	-25.9399	-108.337	-197.144	-240.479	-365.601	-515.137	-841.675
	30.6	33.5693	22.8882	14.0381	5.49316	3.35693	-5.49316	-11.9019	-17.0898	-24.1089	-38.7573	-49.1333	368.652	232.239	135.193	50.0488	-23.8037	-108.032	-193.787	-237.427	-366.821	-512.085	-848.999
	30.7	34.4849	21.6675	14.0381	3.35693	2.74658	-3.66211	-11.2915	-16.4795	-25.9399	-38.4521	-48.2178	365.906	239.563	132.446	51.2695	-24.4141	-111.084	-197.144	-238.037	-373.23	-508.423	-838.928
	30.8	28.9917	22.8882	14.6484	4.27246	2.13623	-4.57764	-11.9019	-15.2588	-28.3813	-40.2832	-47.3022	364.685	251.16	130.615	50.0488	-24.1089	-111.084	-207.825	-236.511	-375.977	-510.864	-828.247
	30.9	29.9072	23.4985	14.3433	6.40869	2.13623	-6.10352	-12.207	-16.1743	-27.771	-44.8608	-45.7764	357.971	263.062	128.174	51.2695	-28.0762	-108.948	-213.623	-240.479	-375.977	-517.578	-846.863
	31	33.8745	23.4985	14.6484	9.46045	1.2207	-5.18799	-11.5967	-17.395	-27.1606	-43.6401	-47.9126	354.004	264.282	126.648	48.2178	-25.6348	-110.779	-211.792	-241.699	-379.944	-517.578	-875.549
	31.1	32.3486	23.4985	13.1226	9.46045	-1.83105	-3.35693	-11.5967	-17.7002	-26.5503	-43.9453	-48.2178	359.802	259.094	129.395	48.8281	-24.1089	-108.948	-216.064	-243.225	-387.573	-516.968	-874.329
	31.2	33.5693	22.8882	13.7329	5.49316	0.915527	-1.83105	-12.207	-15.8691	-27.4658	-43.6401	-48.5229	365.601	256.348	130.005	50.354	-23.8037	-108.337	-221.252	-243.53	-383.301	-520.935	-857.239
	31.3	33.2642	23.1934	12.207	5.79834	3.05176	-3.35693	-12.8174	-15.2588	-29.2969	-41.1987	-48.8281	368.347	254.822	130.92	52.1851	-25.0244	-110.779	-219.727	-251.77	-379.333	-526.428	-847.168
	31.4	32.0435	23.8037	14.0381	6.40869	0.915527	-5.18799	-17.0898	-16.1743	-28.0762	-43.6401	-48.8281	366.516	251.16	132.751	53.1006	-27.1606	-112.915	-217.59	-262.756	-375.061	-522.461	-852.966
	31.5	33.2642	24.1089	15.564	6.10352	2.13623	-4.57764	-17.0898	-16.1743	-26.5503	-43.6401	-49.7437	370.483	247.498	134.888	52.4902	-27.771	-113.22	-221.252	-269.775	-375.061	-509.949	-869.446
	31.6	34.1797	23.8037	12.8174	5.18799	1.52588	-3.05176	-16.1743	-16.4795	-28.3813	-41.5039	-56.1523	374.146	244.141	134.583	48.5229	-25.0244	-115.662	-228.271	-274.963	-372.009	-497.742	-882.263
	31.7	32.6538	23.4985	13.1226	6.71387	1.52588	-3.05176	-14.0381	-16.7847	-26.2451	-40.2832	-54.0161	373.84	239.868	133.667	48.2178	-24.1089	-116.272	-230.713	-277.71	-366.821	-493.164	-893.555
	31.8	34.1797	22.8882	12.5122	6.40869	1.83105	-5.49316	-12.8174	-15.8691	-25.0244	-40.8936	-53.7109	372.925	240.173	134.888	48.8281	-23.8037	-117.188	-230.103	-272.827	-368.347	-500.183	-891.418
	31.9	29.9072	22.8882	12.8174	7.62939	0.915527	-3.96729	-13.4277	-15.8691	-26.5503	-41.1987	-52.7954	374.756	239.563	138.855	47.9126	-24.1089	-117.798	-224.609	-262.146	-373.23	-505.066	-889.282
	32	29.9072	22.583	12.8174	7.32422	1.2207	-3.96729	-14.6484	-17.395	-29.2969	-44.5557	-51.5747	379.944	238.342	137.329	47.9126	-23.8037	-114.441	-219.116	-257.874	-367.432	-513.306	-898.132
	32.1	33.5693	22.8882	12.8174	7.62939	0.915527	-3.35693	-12.8174	-17.0898	-31.1279	-43.335	-50.0488	380.249	246.582	134.277	50.6592	-26.2451	-114.746	-222.473	-253.906	-359.802	-521.851	-915.222
	32.2	32.6538	24.4141	14.3433	6.40869	-0.610352	-3.35693	-11.2915	-16.1743	-32.0435	-42.1143	-50.6592	377.808	249.023	132.751	52.7954	-26.5503	-115.051	-230.713	-250.549	-359.802	-536.804	-922.852
	32.3	31.7383	25.6348	12.5122	4.57764	-2.13623	-2.44141	-10.376	-15.2588	-30.5176	-43.9453	-52.7954	384.521	248.108	130.005	51.2695	-20.752	-110.779	-229.187	-252.686	-364.99	-550.232	-914.001
	32.4	32.0435	25.0244	11.9019	6.10352	1.83105	-3.05176	-11.2915	-15.2588	-28.3813	-45.7764	-48.8281	391.541	248.108	129.089	49.7437	-20.1416	-108.032	-230.103	-256.042	-369.568	-554.504	-892.639
	32.5	30.2124	24.7192	12.5122	5.49316	0.305176	-2.44141	-12.207	-16.1743	-29.6021	-43.335	-46.6919	394.287	252.075	124.207	50.354	-24.7192	-106.506	-230.408	-255.127	-374.451	-552.673	-881.958
	32.6	32.0435	24.4141	12.207	5.79834	-0.915527	-2.44141	-11.9019	-18.0054	-28.9917	-41.8091	-45.7764	388.489	247.192	125.427	51.2695	-28.3813	-106.201	-226.44	-250.244	-375.671	-545.959	-884.399
	32.7	30.8228	25.9399	12.8174	6.10352	0	-4.57764	-11.9019	-17.7002	-28.3813	-43.9453	-47.6074	383.606	244.141	129.089	50.9644	-29.9072	-106.201	-223.999	-246.887	-372.62	-529.175	-870.667
	32.8	30.5176	27.1606	13.7329	5.49316	1.2207	-3.35693	-13.4277	-18.9209	-29.2969	-43.9453	-49.7437	387.573	248.413	128.784	50.9644	-30.5176	-104.37	-221.863	-243.225	-371.704	-507.202	-845.947
	32.9	32.0435	26.5503	14.0381	7.32422	0.305176	-3.35693	-12.8174	-17.395	-26.5503	-44.8608	-52.7954	389.099	249.634	130.005	48.5229	-28.3813	-106.201	-221.558	-245.972	-373.23	-499.573	-836.182
	33	32.959	26.2451	14.3433	7.32422	1.2207	-4.88281	-11.5967	-16.7847	-26.8555	-43.0298	-50.6592	386.353	250.549	129.7	45.4712	-26.8555	-106.812	-222.473	-246.277	-374.146	-502.93	-852.661
	33.1	28.0762	26.5503	13.7329	5.49316	0	-6.40869	-11.2915	-17.395	-28.3813	-41.1987	-49.1333	387.268	252.686	130.005	47.6074	-27.771	-107.727	-222.778	-246.887	-369.873	-507.507	-869.751
	33.2	30.5176	24.1089	12.8174	5.18799	0.610352	-4.88281	-12.5122	-17.395	-29.2969	-40.8936	-53.4058	383.606	253.296	130.615	47.9126	-25.9399	-106.812	-220.947	-246.582	-363.464	-513.306	-880.737
	33.3	30.2124	22.583	13.1226	6.40869	0.915527	-4.57764	-10.9863	-17.0898	-28.9917	-41.8091	-51.5747	380.859	249.329	129.395	46.6919	-25.3296	-106.506	-219.116	-246.887	-359.192	-521.545	-873.413
	33.4	27.771	24.1089	12.207	6.40869	-0.610352	-3.66211	-11.2915	-16.4795	-30.5176	-41.5039	-48.5229	386.047	245.056	126.038	46.6919	-25.0244	-106.506	-213.623	-241.394	-354.004	-525.208	-857.239
	33.5	29.9072	23.4985	12.8174	7.62939	0	-3.05176	-11.2915	-16.7847	-27.771	-41.1987	-48.5229	382.385	238.953	125.427	48.5229	-24.1089	-106.201	-213.318	-236.206	-349.426	-520.935	-847.168
	33.6	29.6021	23.1934	13.4277	5.49316	1.83105	-1.83105	-9.76562	-15.2588	-26.2451	-39.6729	-48.2178	378.723	235.901	124.207	46.9971	-30.5176	-105.286	-215.454	-237.427	-350.647	-523.682	-842.59
	33.7	30.8228	23.4985	10.376	5.18799	0.305176	-3.96729	-10.6812	-17.0898	-26.5503	-40.8936	-49.7437	391.846	234.68	124.207	47.3022	-29.2969	-105.591	-212.097	-240.479	-356.445	-533.142	-851.44
	33.8	29.9072	22.8882	10.6812	6.71387	-0.305176	-3.96729	-11.9019	-15.8691	-27.771	-42.4194	-50.6592	403.442	233.459	126.648	43.335	-27.771	-104.98	-214.233	-237.732	-356.75	-530.396	-867.92
	33.9	29.2969	23.1934	12.207	6.10352	2.44141	-2.13623	-10.6812	-15.8691	-27.4658	-41.5039	-50.354	404.358	231.934	131.226	45.7764	-27.4658	-113.831	-216.37	-237.122	-351.868	-524.902	-865.479
	34	31.7383	26.2451	14.3433	4.27246	2.13623	-3.66211	-12.5122	-17.0898	-28.3813	-41.1987	-48.2178	397.949	231.934	132.751	47.9126	-26.5503	-114.441	-213.928	-244.446	-352.478	-519.409	-845.642
	34.1	26.8555	27.4658	15.564	5.79834	1.2207	-5.79834	-14.3433	-17.0898	-26.8555	-39.978	-47.9126	390.015	227.661	130.005	47.3022	-26.2451	-111.084	-208.13	-248.108	-358.887	-516.968	-841.98
	34.2	30.8228	26.5503	12.5122	5.18799	0	-5.79834	-10.6812	-16.7847	-26.8555	-38.147	-49.1333	385.437	226.746	128.784	47.6074	-27.1606	-111.084	-206.299	-247.192	-362.854	-520.935	-868.835
	34.3	32.959	25.6348	13.1226	6.71387	-0.305176	-4.57764	-10.6812	-17.395	-27.4658	-36.6211	-54.3213	382.69	225.525	128.174	46.6919	-25.3296	-113.831	-208.13	-246.582	-357.666	-527.649	-898.132
	34.4	28.0762	25.6348	15.2588	7.93457	0.610352	-3.96729	-10.6812	-16.7847	-28.6865	-38.4521	-57.0679	381.165	225.525	129.7	44.2505	-26.5503	-112.915	-208.435	-243.835	-351.562	-539.246	-892.639
	34.5	27.771	25.6348	16.1743	7.01904	1.83105	-3.05176	-10.376	-18.6157	-30.2124	-36.6211	-51.8799	381.775	225.22	130.92	44.5557	-27.4658	-109.558	-213.013	-238.037	-342.712	-544.434	-873.108
	34.6	28.0762	25.6348	13.1226	7.62939	1.83105	-2.13623	-12.5122	-17.7002	-28.9917	-36.0107	-52.7954	383.911	220.947	130.92	45.7764	-27.771	-108.643	-217.285	-236.206	-338.135	-539.856	-875.854
	34.7	29.2969	23.8037	11.5967	8.23975	2.44141	-1.83105	-14.6484	-16.1743	-27.771	-37.2314	-51.5747	384.216	218.506	129.395	44.2505	-26.2451	-109.253	-215.454	-239.868	-339.661	-544.739	-881.653
	34.8	28.0762	21.3623	14.9536	6.10352	2.13623	-1.83105	-14.3433	-16.4795	-26.5503	-38.147	-49.4385	382.385	227.661	123.901	46.3867	-26.5503	-110.474	-211.487	-247.498	-346.68	-556.946	-863.037
	34.9	30.8228	25.0244	14.0381	6.10352	0.915527	-2.13623	-12.8174	-17.0898	-27.4658	-38.147	-49.1333	380.554	231.323	121.155	46.0815	-28.9917	-110.474	-203.857	-256.348	-346.985	-559.387	-846.558
	35	29.9072	27.1606	14.0381	5.79834	1.52588	-2.74658	-9.15527	-15.564	-26.8555	-38.4521	-50.6592	375.366	227.661	120.85	46.6919	-25.9399	-111.084	-203.552	-260.62	-351.868	-560.303	-842.285
	35.1	28.9917	22.583	12.8174	7.32422	1.52588	-3.66211	-9.15527	-16.7847	-27.1606	-37.2314	-48.2178	372.314	227.356	124.207	47.3022	-25.0244	-116.882	-211.792	-256.042	-357.971	-566.101	-846.558
	35.2	31.7383	20.4468	12.207	9.15527	1.52588	-4.27246	-14.0381	-19.2261	-26.5503	-36.3159	-47.6074	365.295	233.459	124.817	47.9126	-25.0244	-118.103	-212.708	-252.38	-368.958	-568.848	-859.68
	35.3	30.8228	22.2778	12.8174	7.32422	2.13623	-3.66211	-12.8174	-17.7002	-25.0244	-37.8418	-45.4712	359.192	238.037	127.258	47.9126	-25.9399	-116.882	-209.656	-256.348	-375.366	-566.406	-888.062
	35.4	28.3813	25.6348	13.7329	6.10352	0	-2.74658	-13.4277	-17.395	-27.4658	-37.5366	-43.6401	355.835	234.375	126.648	46.0815	-27.4658	-112.915	-209.045	-263.672	-375.061	-571.899	-892.944
	35.5	28.6865	24.4141	12.5122	6.40869	2.13623	-4.27246	-13.7329	-17.0898	-27.1606	-38.4521	-47.3022	357.666	229.492	124.817	46.9971	-26.2451	-112.305	-205.078	-262.451	-372.925	-575.562	-880.432
	35.6	31.4331	23.4985	12.207	7.62939	2.13623	-3.96729	-11.5967	-14.9536	-25.3296	-40.2832	-45.7764	357.666	229.187	124.207	47.6074	-29.2969	-111.389	-201.416	-256.348	-363.77	-574.341	-865.479
	35.7	32.959	22.2778	14.9536	7.62939	0	-1.83105	-10.9863	-14.3433	-25.0244	-41.5039	-43.0298	363.464	231.018	128.784	48.5229	-28.9917	-112.61	-203.552	-254.211	-362.244	-568.542	-850.525
	35.8	30.2124	23.1934	15.2588	6.71387	0.305176	-3.05176	-10.9863	-16.1743	-28.9917	-43.9453	-44.2505	365.906	234.07	134.888	47.6074	-25.3296	-111.084	-203.247	-257.874	-366.211	-554.504	-852.966
	35.9	31.7383	22.583	12.5122	7.01904	2.13623	-3.05176	-11.5967	-18.0054	-30.5176	-45.166	-43.0298	360.718	237.427	134.277	46.3867	-25.9399	-108.032	-200.195	-261.536	-372.314	-543.213	-846.558
	36	31.7383	22.583	10.6812	8.23975	3.35693	-4.57764	-11.2915	-18.9209	-32.0435	-40.5884	-41.5039	355.835	242.004	133.667	46.0815	-28.9917	-109.863	-199.89	-259.094	-375.977	-537.415	-826.111
	36.1	28.6865	24.4141	12.207	8.8501	-0.305176	-3.66211	-11.5967	-16.7847	-32.3486	-39.978	-41.8091	357.361	239.258	131.836	47.3022	-29.2969	-110.779	-203.857	-257.874	-368.042	-535.889	-800.171
	36.2	32.0435	22.8882	13.1226	7.32422	-0.305176	-2.74658	-10.376	-14.3433	-31.1279	-41.5039	-41.1987	364.075	233.154	127.869	46.9971	-28.6865	-107.117	-204.773	-260.925	-354.004	-538.635	-797.729
	36.3	32.959	22.8882	13.7329	9.46045	0.305176	-3.96729	-10.6812	-15.2588	-31.1279	-38.7573	-41.1987	369.263	229.492	126.038	44.8608	-27.771	-107.727	-204.468	-263.367	-342.102	-548.096	-812.073
	36.4	30.5176	23.4985	11.9019	9.76562	1.52588	-2.74658	-10.0708	-17.7002	-29.9072	-39.978	-43.0298	373.23	227.661	127.258	44.8608	-25.9399	-107.117	-201.721	-266.113	-339.661	-557.251	-811.157
	36.5	28.3813	23.8037	11.2915	9.46045	0.915527	-0.915527	-11.2915	-16.4795	-30.8228	-40.2832	-43.335	376.587	229.797	126.953	47.3022	-25.9399	-108.948	-204.163	-263.977	-343.018	-566.406	-812.988
	36.6	29.2969	24.1089	10.9863	7.32422	0.305176	-1.2207	-12.207	-15.8691	-30.2124	-39.6729	-43.0298	383.911	230.103	126.038	49.1333	-25.0244	-111.694	-201.721	-263.062	-353.394	-574.036	-812.073
	36.7	29.2969	24.1089	11.9019	6.10352	0.915527	-3.05176	-10.6812	-19.8364	-28.9917	-40.2832	-41.5039	383.301	230.103	124.817	46.9971	-25.3296	-112.915	-195.312	-261.536	-359.497	-583.191	-823.975
	36.8	30.8228	23.4985	13.4277	5.49316	2.44141	-3.66211	-7.93457	-21.0571	-29.6021	-43.335	-45.4712	381.165	227.051	123.596	44.8608	-29.6021	-110.779	-195.007	-261.23	-358.887	-580.444	-829.773
	36.9	29.2969	24.4141	15.2588	8.23975	1.2207	-4.88281	-8.23975	-21.3623	-28.9917	-41.8091	-47.3022	383.301	229.797	120.239	44.2505	-28.3813	-112.61	-196.838	-262.146	-362.854	-562.744	-828.552
	37	27.771	23.8037	14.3433	9.15527	0.915527	-5.49316	-9.76562	-17.395	-28.3813	-41.1987	-47.3022	378.723	234.68	119.934	43.6401	-27.771	-114.136	-198.975	-259.705	-368.652	-547.791	-830.383
	37.1	28.3813	22.583	13.7329	8.54492	-0.305176	-3.05176	-7.62939	-16.1743	-27.1606	-39.6729	-46.9971	377.197	238.342	120.544	45.7764	-29.9072	-115.051	-199.585	-256.042	-370.483	-538.94	-844.116
	37.2	26.8555	22.583	12.207	7.01904	-0.305176	-2.44141	-10.9863	-18.6157	-27.4658	-36.9263	-47.9126	379.333	238.037	119.019	46.3867	-30.2124	-116.577	-200.806	-254.822	-372.314	-540.466	-868.835
	37.3	26.5503	22.8882	10.6812	7.32422	-1.2207	-3.66211	-13.4277	-17.7002	-28.3813	-36.3159	-44.5557	377.197	234.375	121.155	44.8608	-29.9072	-118.103	-201.111	-256.653	-368.958	-539.551	-870.056
	37.4	30.2124	22.583	10.6812	7.32422	0.610352	-3.96729	-11.5967	-15.2588	-27.771	-36.6211	-42.7246	368.652	234.07	119.019	44.8608	-25.3296	-117.798	-204.773	-248.413	-363.464	-531.616	-852.661
	37.5	29.9072	20.752	10.6812	6.10352	1.83105	-3.66211	-10.0708	-15.2588	-27.771	-38.147	-39.6729	359.192	239.258	115.967	47.9126	-25.6348	-116.272	-206.604	-242.92	-356.75	-548.401	-843.811
	37.6	31.1279	22.583	13.7329	6.10352	-0.610352	-5.49316	-10.9863	-14.9536	-27.771	-39.3677	-42.1143	364.075	241.394	116.272	48.8281	-29.2969	-114.746	-205.688	-241.699	-354.919	-568.237	-859.07
	37.7	30.8228	22.583	13.1226	6.71387	1.52588	-4.27246	-10.0708	-15.2588	-26.2451	-40.5884	-42.4194	373.84	239.868	120.544	46.9971	-29.9072	-112.61	-211.792	-242.31	-354.919	-567.017	-871.582
	37.8	29.6021	22.583	13.1226	9.46045	3.05176	-3.96729	-10.6812	-17.395	-27.4658	-39.3677	-41.1987	379.028	237.427	125.427	47.9126	-27.1606	-116.272	-213.013	-244.141	-360.107	-554.504	-867.31
	37.9	30.5176	22.8882	12.8174	7.62939	2.13623	-2.13623	-11.5967	-16.4795	-27.771	-39.978	-40.8936	381.165	236.206	124.817	49.7437	-25.3296	-117.493	-213.318	-245.056	-360.718	-535.583	-863.037
	38	29.6021	24.4141	11.9019	6.10352	2.13623	-2.74658	-13.7329	-16.7847	-28.3813	-40.5884	-42.4194	383.301	233.154	120.85	51.5747	-28.6865	-116.882	-215.759	-250.244	-361.328	-526.733	-851.746
	38.1	28.0762	25.3296	13.4277	5.49316	3.35693	-2.74658	-10.9863	-19.2261	-29.6021	-39.3677	-44.2505	389.709	227.051	124.207	49.7437	-31.7383	-116.272	-214.233	-256.653	-358.887	-533.142	-832.52
	38.2	32.3486	25.3296	14.9536	6.71387	2.13623	-2.74658	-10.376	-17.7002	-26.5503	-38.4521	-43.9453	391.235	225.83	129.089	48.5229	-30.2124	-113.525	-211.182	-255.432	-356.14	-529.175	-822.449
	38.3	31.1279	23.1934	12.8174	7.32422	3.05176	-3.66211	-10.9863	-14.0381	-25.0244	-37.5366	-46.9971	382.08	223.694	124.817	48.2178	-28.3813	-112.61	-204.163	-249.023	-356.75	-528.259	-831.299
	38.4	28.3813	22.8882	11.5967	9.76562	3.05176	-1.52588	-12.207	-15.564	-27.4658	-39.978	-49.1333	379.333	222.778	122.681	46.6919	-28.6865	-114.441	-197.144	-249.329	-360.718	-533.752	-835.571
	38.5	28.9917	24.4141	13.1226	7.62939	3.05176	-1.83105	-11.2915	-21.0571	-29.6021	-38.147	-47.3022	378.723	222.473	124.207	46.9971	-27.1606	-115.356	-193.787	-250.854	-366.211	-529.785	-828.857
	38.6	27.771	23.1934	11.9019	6.71387	3.66211	-1.83105	-11.9019	-18.6157	-29.9072	-35.7056	-46.0815	383.606	224.304	126.343	46.3867	-27.1606	-118.103	-193.176	-251.465	-373.84	-516.663	-825.5
	38.7	28.3813	22.2778	10.6812	7.32422	1.83105	-1.83105	-13.7329	-17.0898	-28.9917	-36.9263	-49.4385	387.878	231.628	124.817	46.3867	-29.6021	-120.85	-188.599	-251.77	-378.113	-516.663	-845.032
	38.8	30.2124	21.6675	13.7329	7.01904	0.305176	-0.610352	-13.7329	-15.8691	-28.3813	-39.6729	-51.2695	382.69	233.154	126.953	45.7764	-33.8745	-120.85	-185.242	-255.432	-377.808	-519.714	-863.037
	38.9	29.2969	20.4468	14.0381	6.10352	1.83105	-1.2207	-10.9863	-14.3433	-28.9917	-43.0298	-47.9126	375.671	227.051	127.258	43.9453	-32.6538	-117.798	-187.073	-256.958	-377.197	-524.292	-865.479
	39	30.5176	21.9727	14.3433	9.15527	2.13623	-2.13623	-10.376	-18.6157	-28.6865	-43.6401	-52.1851	370.483	224.609	125.427	45.4712	-31.4331	-115.967	-193.787	-260.62	-375.671	-536.499	-873.718
	39.1	30.8228	23.1934	12.8174	10.0708	3.35693	-0.915527	-8.54492	-18.6157	-26.2451	-44.8608	-51.5747	367.432	228.577	121.46	46.9971	-29.9072	-116.272	-195.618	-260.62	-377.808	-551.147	-869.446
	39.2	26.2451	21.6675	12.207	7.62939	3.05176	-1.83105	-9.76562	-18.0054	-25.9399	-43.335	-48.5229	369.568	232.849	120.239	47.3022	-28.9917	-117.493	-195.923	-256.348	-380.859	-558.472	-865.479
	39.3	26.8555	21.0571	11.9019	5.79834	3.66211	-4.27246	-11.5967	-18.6157	-27.1606	-43.9453	-50.0488	373.23	235.596	119.324	47.9126	-28.3813	-119.629	-194.397	-257.568	-377.808	-555.115	-855.713
	39.4	32.0435	21.9727	14.3433	5.18799	2.13623	-6.10352	-11.5967	-16.4795	-29.6021	-43.9453	-50.9644	375.977	236.206	119.324	44.8608	-28.6865	-117.493	-193.787	-256.348	-372.925	-539.856	-845.642
	39.5	31.7383	23.4985	13.4277	7.01904	1.52588	-3.66211	-11.9019	-17.395	-30.2124	-42.1143	-52.1851	372.62	238.953	115.967	45.4712	-30.8228	-116.882	-194.702	-256.653	-370.483	-527.039	-852.356
	39.6	29.2969	24.4141	11.2915	7.93457	1.83105	-2.13623	-10.376	-17.0898	-30.2124	-41.1987	-54.6265	366.211	244.141	113.831	48.5229	-28.3813	-113.525	-195.618	-258.179	-367.737	-524.292	-863.953
	39.7	28.0762	23.1934	10.376	6.71387	2.44141	-0.610352	-10.376	-14.6484	-29.9072	-42.7246	-53.1006	366.821	242.31	114.441	47.9126	-27.4658	-109.863	-197.144	-262.146	-367.432	-523.987	-859.07
	39.8	32.0435	22.8882	13.1226	7.01904	3.05176	-3.05176	-11.2915	-15.2588	-30.8228	-41.1987	-53.7109	370.483	242.004	113.22	46.0815	-27.771	-110.474	-198.669	-260.925	-368.958	-528.564	-839.233
	39.9	28.9917	24.1089	13.4277	7.93457	0.610352	-3.66211	-11.9019	-17.395	-30.8228	-39.978	-50.354	372.009	244.751	113.22	46.9971	-30.2124	-112.61	-200.5	-256.653	-382.996	-533.752	-841.675
	40	29.6021	23.1934	13.1226	8.8501	2.44141	-0.305176	-13.1226	-18.6157	-31.1279	-41.1987	-47.6074	372.314	248.108	115.356	48.5229	-28.0762	-115.662	-198.059	-255.127	-397.034	-539.551	-867.92
	40.1	30.5176	22.583	14.3433	7.32422	3.05176	-0.915527	-12.5122	-18.6157	-31.4331	-41.8091	-46.6919	366.516	249.023	119.629	49.7437	-27.1606	-117.188	-195.312	-257.874	-397.034	-553.589	-870.667
	40.2	27.1606	25.3296	14.9536	5.79834	1.83105	-2.74658	-11.5967	-18.0054	-30.5176	-43.0298	-45.4712	359.192	247.803	119.934	46.0815	-28.3813	-119.629	-193.176	-256.653	-394.592	-562.439	-859.68
	40.3	30.2124	25.6348	12.8174	7.01904	1.83105	-3.96729	-8.8501	-19.2261	-27.1606	-43.0298	-47.9126	356.14	248.108	118.408	47.6074	-26.5503	-118.408	-194.092	-256.042	-393.677	-579.224	-871.582
	40.4	33.2642	24.4141	10.6812	7.62939	2.44141	-5.49316	-8.54492	-20.1416	-24.1089	-41.8091	-50.9644	356.14	246.277	118.408	50.0488	-24.7192	-120.544	-194.092	-254.822	-399.17	-594.788	-874.634
	40.5	31.1279	23.1934	10.9863	7.32422	2.74658	-3.96729	-9.76562	-20.1416	-26.5503	-40.8936	-51.5747	357.056	242.004	120.544	47.3022	-24.1089	-120.544	-191.04	-257.263	-394.897	-600.891	-870.972
	40.6	28.3813	22.2778	10.376	9.46045	1.52588	-1.52588	-12.8174	-21.0571	-27.1606	-38.4521	-47.9126	361.328	244.446	121.155	45.166	-26.8555	-117.493	-187.683	-256.653	-394.592	-590.82	-869.751
	40.7	26.8555	21.9727	11.2915	7.62939	0.915527	-3.35693	-10.6812	-21.9727	-27.771	-36.3159	-46.3867	365.601	247.498	119.324	48.8281	-30.8228	-117.188	-185.852	-257.568	-397.949	-590.21	-869.446
	40.8	27.771	23.4985	12.5122	5.79834	0.915527	-3.05176	-8.8501	-20.752	-27.771	-33.8745	-46.6919	364.685	249.023	117.188	48.2178	-31.1279	-119.934	-187.378	-262.146	-395.203	-593.872	-864.258
	40.9	29.2969	24.7192	12.207	6.10352	1.83105	-2.74658	-11.2915	-17.395	-27.771	-35.7056	-49.4385	356.75	243.835	116.272	46.6919	-26.5503	-119.019	-188.293	-261.23	-391.846	-593.567	-867.004
	41	28.9917	25.6348	11.2915	7.01904	-0.610352	-4.27246	-12.8174	-19.8364	-29.9072	-37.2314	-52.4902	351.257	238.953	117.188	49.1333	-25.3296	-115.662	-193.481	-257.263	-401.306	-592.346	-857.849
	41.1	31.1279	23.4985	11.5967	7.93457	-1.83105	-2.44141	-10.376	-20.1416	-29.6021	-38.147	-52.7954	357.971	237.427	122.07	48.2178	-23.8037	-118.713	-195.007	-254.822	-406.494	-594.788	-841.064
	41.2	25.9399	20.752	10.9863	7.93457	2.13623	-3.35693	-9.76562	-18.9209	-30.8228	-37.2314	-54.3213	362.549	235.901	126.343	44.2505	-21.6675	-119.629	-197.754	-248.108	-402.527	-597.229	-847.168
	41.3	28.0762	20.752	10.9863	9.46045	3.35693	-6.10352	-10.9863	-18.0054	-31.7383	-35.0952	-54.6265	366.211	231.323	124.817	45.166	-23.8037	-119.324	-199.89	-246.582	-394.592	-607.91	-864.563
	41.4	31.4331	18.9209	12.8174	7.93457	2.74658	-3.96729	-9.76562	-17.395	-32.3486	-37.8418	-55.8472	372.314	229.187	122.986	50.0488	-24.1089	-117.798	-198.364	-252.075	-392.761	-620.117	-885.62
	41.5	31.4331	20.1416	16.4795	5.79834	2.74658	-3.35693	-10.376	-17.7002	-27.4658	-38.7573	-54.6265	372.314	228.577	122.375	49.1333	-26.2451	-119.324	-201.416	-256.042	-395.508	-634.155	-889.282
	41.6	32.6538	20.752	14.0381	7.01904	1.52588	-4.88281	-12.5122	-16.4795	-26.8555	-37.2314	-54.3213	375.977	227.661	124.817	46.6919	-27.771	-115.967	-208.74	-254.211	-398.56	-643.616	-888.977
	41.7	30.8228	21.3623	11.9019	7.01904	1.83105	-5.18799	-12.5122	-16.7847	-26.8555	-35.0952	-54.3213	375.977	229.797	123.901	48.5229	-28.3813	-111.084	-213.623	-251.16	-404.053	-645.142	-908.508
	41.8	30.5176	18.6157	14.3433	5.49316	2.13623	-3.66211	-11.9019	-17.7002	-26.8555	-33.8745	-54.9316	363.77	227.356	123.901	49.7437	-31.1279	-105.896	-211.182	-243.53	-409.851	-662.231	-945.435
	41.9	29.9072	20.4468	14.3433	6.10352	2.74658	-3.66211	-13.4277	-19.5312	-28.3813	-35.0952	-53.7109	354.919	228.271	122.681	50.9644	-32.6538	-106.812	-206.909	-233.459	-408.02	-678.711	-960.388
	42	33.5693	21.9727	14.3433	7.01904	2.13623	-2.44141	-11.2915	-18.6157	-28.0762	-35.7056	-54.0161	354.004	231.323	122.375	50.354	-30.2124	-108.948	-203.857	-225.83	-408.325	-685.12	-947.266
	42.1	35.4004	22.2778	13.7329	6.40869	1.52588	-1.52588	-10.376	-15.8691	-28.3813	-32.0435	-57.373	350.647	231.934	117.798	51.2695	-28.9917	-111.389	-200.5	-225.83	-408.02	-666.809	-938.721
	42.2	33.8745	22.2778	13.7329	7.93457	0.305176	-1.83105	-11.5967	-16.7847	-27.1606	-29.6021	-53.1006	345.459	233.765	116.272	49.7437	-28.6865	-105.896	-199.585	-234.07	-411.377	-644.531	-937.5
	42.3	32.6538	22.583	14.0381	8.8501	0	-4.27246	-13.4277	-17.0898	-25.9399	-30.8228	-50.9644	344.543	236.511	119.324	47.9126	-29.9072	-102.539	-204.773	-242.92	-409.546	-625.61	-933.533
	42.4	31.4331	21.3623	12.8174	7.32422	0.305176	-3.96729	-11.9019	-17.7002	-26.5503	-32.6538	-56.1523	351.257	241.699	121.46	47.6074	-29.9072	-103.455	-210.571	-243.225	-408.936	-617.065	-923.767
	42.5	35.4004	20.4468	13.1226	6.71387	0	-1.83105	-9.76562	-18.6157	-26.5503	-33.2642	-52.4902	354.919	239.868	118.713	47.9126	-31.4331	-104.98	-218.506	-237.732	-406.189	-606.384	-916.443
	42.6	35.7056	20.1416	12.5122	8.23975	1.52588	-0.610352	-12.5122	-18.6157	-26.5503	-31.4331	-50.354	353.394	235.596	122.681	46.3867	-32.959	-106.506	-226.746	-240.479	-398.56	-590.21	-920.105
	42.7	32.6538	18.9209	12.207	8.23975	0.915527	-3.05176	-10.9863	-18.0054	-26.2451	-30.8228	-49.1333	352.478	229.187	124.817	48.2178	-34.4849	-106.506	-225.525	-244.141	-400.696	-574.036	-924.377
	42.8	31.4331	21.6675	14.9536	6.40869	0.915527	-4.88281	-10.0708	-18.6157	-26.8555	-30.8228	-50.0488	347.595	221.558	122.986	47.9126	-29.2969	-104.065	-214.844	-243.835	-404.358	-567.932	-919.8
	42.9	32.959	21.9727	14.3433	5.79834	0.915527	-3.05176	-10.0708	-17.0898	-28.3813	-32.0435	-49.4385	344.543	220.642	121.155	46.0815	-28.3813	-105.286	-209.961	-239.258	-405.579	-576.477	-907.288
	43	33.2642	20.752	14.0381	7.01904	1.2207	-3.66211	-9.76562	-17.395	-28.6865	-30.8228	-49.1333	346.68	222.473	118.408	46.0815	-31.4331	-105.286	-212.402	-235.901	-400.391	-578.613	-883.789
	43.1	32.0435	19.8364	14.6484	9.76562	1.52588	-4.88281	-11.2915	-19.2261	-28.6865	-31.4331	-52.1851	351.562	221.252	121.765	47.9126	-29.9072	-105.286	-210.571	-243.225	-393.372	-574.341	-886.536
	43.2	33.8745	20.1416	11.9019	9.76562	3.96729	-3.66211	-12.8174	-19.5312	-29.9072	-34.1797	-49.7437	358.582	217.285	126.648	49.1333	-28.9917	-108.032	-209.045	-243.835	-384.216	-577.393	-897.217
	43.3	32.6538	20.752	10.0708	8.23975	1.2207	-2.13623	-12.8174	-17.7002	-29.6021	-36.0107	-49.4385	362.854	216.37	127.869	48.2178	-27.1606	-110.474	-208.13	-242.615	-378.418	-588.379	-908.813
	43.4	31.1279	21.0571	12.207	5.49316	1.52588	-3.35693	-13.4277	-16.7847	-32.3486	-36.0107	-54.3213	365.601	218.201	126.648	47.6074	-26.2451	-108.948	-208.74	-236.816	-380.859	-591.736	-902.71
	43.5	34.79	21.3623	14.6484	5.79834	3.05176	-3.35693	-12.5122	-16.4795	-32.0435	-34.79	-55.8472	368.652	221.252	126.038	48.2178	-27.1606	-108.337	-208.74	-235.596	-381.47	-585.632	-891.418
	43.6	35.0952	21.9727	12.8174	5.49316	1.52588	-3.35693	-13.7329	-17.7002	-30.2124	-34.4849	-56.4575	370.483	221.863	124.817	50.354	-28.9917	-107.422	-209.045	-240.784	-379.639	-577.698	-894.47
	43.7	34.1797	20.4468	13.1226	7.93457	-0.610352	-2.74658	-11.9019	-17.7002	-28.6865	-34.79	-55.8472	369.263	224.915	126.343	49.1333	-28.3813	-105.286	-214.539	-245.361	-379.639	-575.867	-899.048
	43.8	34.4849	19.5312	13.7329	7.62939	-0.610352	-2.44141	-9.46045	-16.7847	-29.9072	-35.4004	-54.6265	368.652	224.609	128.174	49.1333	-28.9917	-107.727	-217.896	-248.108	-379.333	-576.782	-884.399
	43.9	33.5693	21.6675	12.5122	7.93457	0.305176	-1.52588	-10.376	-17.395	-31.4331	-33.8745	-55.542	372.925	222.778	126.648	48.2178	-26.5503	-109.253	-216.37	-249.329	-386.047	-575.562	-865.784
	44	33.2642	21.9727	13.1226	8.8501	1.83105	-2.44141	-12.8174	-17.7002	-32.3486	-33.2642	-59.8145	377.808	227.356	124.817	47.6074	-24.4141	-111.389	-208.435	-248.413	-393.066	-576.172	-854.492
	44.1	35.0952	23.4985	13.1226	6.40869	3.05176	-2.13623	-11.9019	-19.2261	-30.2124	-32.959	-61.3403	374.146	227.966	123.901	49.7437	-26.2451	-111.694	-203.552	-250.854	-390.93	-565.186	-839.539
	44.2	36.3159	22.8882	10.9863	6.10352	-1.2207	-1.2207	-10.376	-19.2261	-26.5503	-32.3486	-58.5938	366.516	225.525	125.122	49.7437	-28.6865	-106.201	-205.078	-257.263	-389.709	-555.42	-832.214
	44.3	32.6538	21.6675	10.6812	7.32422	-1.83105	-3.96729	-9.15527	-16.7847	-26.5503	-32.0435	-59.5093	366.821	224.609	124.207	46.9971	-26.5503	-102.844	-206.909	-264.893	-391.235	-559.998	-844.727
	44.4	28.9917	20.1416	10.9863	6.40869	0.915527	-5.79834	-8.54492	-17.395	-28.3813	-31.7383	-59.5093	377.808	227.966	123.291	44.5557	-24.4141	-102.234	-212.402	-262.451	-396.118	-571.289	-868.225
	44.5	30.5176	20.1416	11.9019	5.18799	2.44141	-3.66211	-9.15527	-21.0571	-29.6021	-31.4331	-59.8145	382.385	233.459	123.596	44.2505	-27.1606	-102.539	-215.149	-255.737	-404.968	-571.899	-879.822
	44.6	32.0435	20.1416	8.54492	4.27246	1.52588	-1.2207	-14.6484	-21.6675	-29.9072	-31.1279	-57.6782	374.146	231.323	123.901	47.3022	-28.6865	-106.201	-208.435	-251.16	-413.818	-565.491	-874.329
	44.7	33.5693	18.9209	9.15527	4.57764	1.83105	-2.74658	-11.9019	-18.6157	-30.2124	-31.1279	-54.3213	363.77	223.694	124.817	47.3022	-27.771	-107.422	-205.688	-250.854	-408.63	-558.167	-868.53
	44.8	33.5693	18.9209	13.4277	3.96729	-0.610352	-6.71387	-9.76562	-16.7847	-28.3813	-30.5176	-51.8799	355.53	220.032	121.765	46.6919	-27.1606	-107.422	-204.468	-253.601	-406.189	-556.641	-872.803
	44.9	32.959	19.8364	12.5122	7.32422	-0.915527	-7.93457	-10.6812	-16.7847	-26.8555	-33.2642	-50.9644	357.971	223.083	121.765	46.6919	-26.2451	-104.37	-206.299	-255.127	-415.955	-550.537	-896.606
	45	34.1797	18.9209	12.207	7.32422	-1.52588	-4.88281	-11.2915	-16.1743	-25.0244	-35.4004	-48.5229	367.126	223.083	123.291	46.0815	-24.1089	-103.455	-202.332	-247.803	-423.584	-549.622	-924.683
	45.1	32.6538	19.5312	12.207	7.01904	-1.2207	-0.305176	-10.9863	-15.8691	-25.6348	-36.0107	-48.8281	374.756	218.811	122.986	47.3022	-23.8037	-103.76	-195.923	-244.141	-428.162	-557.861	-937.195
	45.2	31.4331	19.5312	12.207	6.10352	1.83105	-3.66211	-10.9863	-18.6157	-28.0762	-34.79	-47.3022	377.197	216.675	121.46	46.9971	-25.3296	-104.675	-195.618	-248.108	-426.331	-562.439	-943.298
	45.3	34.1797	19.2261	11.9019	5.49316	1.83105	-6.40869	-13.4277	-18.6157	-29.2969	-32.6538	-44.8608	379.639	217.285	120.239	46.0815	-29.2969	-102.539	-194.092	-248.413	-425.72	-567.322	-935.669
	45.4	33.2642	20.4468	12.8174	5.18799	1.83105	-6.40869	-14.6484	-16.4795	-27.1606	-33.2642	-47.9126	380.859	221.558	120.239	49.7437	-29.9072	-99.4873	-193.787	-249.939	-419.617	-575.867	-921.631
	45.5	30.8228	21.0571	14.3433	5.18799	1.2207	-5.79834	-15.8691	-14.6484	-26.2451	-33.5693	-49.1333	379.028	228.882	121.155	49.7437	-27.4658	-100.403	-188.293	-250.244	-410.461	-583.496	-916.443
	45.6	32.959	22.2778	13.4277	5.49316	1.2207	-4.57764	-12.8174	-14.9536	-26.2451	-33.5693	-50.9644	371.094	232.544	121.765	46.6919	-27.4658	-99.1821	-187.988	-249.329	-401.001	-592.041	-918.884
	45.7	32.6538	20.752	12.5122	6.10352	1.52588	-5.49316	-12.8174	-16.4795	-25.6348	-33.2642	-53.1006	361.633	234.07	123.596	47.9126	-29.6021	-96.4355	-193.787	-249.023	-399.78	-585.938	-906.067
	45.8	31.4331	18.0054	10.9863	8.54492	2.13623	-5.49316	-14.0381	-17.7002	-26.5503	-31.1279	-51.5747	364.99	242.31	127.869	47.6074	-26.8555	-96.7407	-192.566	-249.634	-398.865	-570.984	-902.71
	45.9	31.1279	20.1416	10.9863	9.15527	2.13623	-2.44141	-13.1226	-16.7847	-26.5503	-30.8228	-52.4902	374.756	243.53	127.258	46.0815	-24.7192	-98.2666	-191.345	-250.244	-393.982	-563.049	-907.288
	46	30.8228	20.4468	11.5967	7.62939	3.35693	-1.83105	-14.6484	-15.8691	-26.5503	-29.6021	-52.1851	376.892	234.985	125.122	48.5229	-26.8555	-101.624	-191.345	-254.517	-395.508	-553.589	-921.326
	46.1	34.1797	24.1089	11.5967	5.79834	3.96729	-2.74658	-13.1226	-15.564	-26.5503	-32.3486	-51.5747	376.892	229.187	126.648	50.0488	-28.0762	-104.065	-189.819	-259.094	-403.442	-544.128	-936.89
	46.2	31.4331	22.8882	12.207	5.18799	1.83105	-3.96729	-10.9863	-14.9536	-25.9399	-32.959	-52.1851	375.366	225.83	125.732	47.3022	-28.6865	-103.455	-187.378	-257.874	-405.884	-548.706	-935.364
	46.3	30.8228	21.3623	11.5967	5.49316	-1.2207	-2.74658	-11.9019	-14.3433	-25.6348	-29.9072	-52.1851	372.009	226.44	126.038	46.6919	-27.771	-101.624	-187.378	-251.16	-392.151	-563.354	-922.546
	46.4	27.771	19.5312	11.9019	7.62939	0	-2.44141	-12.207	-16.4795	-25.3296	-31.4331	-52.4902	364.99	226.746	126.648	45.166	-25.0244	-102.234	-187.683	-251.465	-378.418	-565.186	-928.04
	46.5	32.3486	20.4468	11.5967	7.93457	1.52588	-5.49316	-10.376	-17.395	-27.771	-33.5693	-50.9644	364.38	222.473	125.732	47.3022	-25.3296	-98.877	-186.768	-257.874	-380.554	-567.322	-943.909
	46.6	34.79	22.8882	11.9019	6.40869	2.13623	-3.66211	-10.376	-16.1743	-31.1279	-32.3486	-50.354	371.094	218.201	127.258	49.7437	-25.3296	-96.4355	-188.599	-262.451	-388.489	-574.341	-949.707
	46.7	32.959	21.0571	13.1226	5.79834	0.610352	-3.05176	-11.5967	-18.9209	-31.1279	-32.959	-47.6074	377.808	220.337	130.31	49.7437	-25.0244	-94.9097	-191.345	-261.536	-382.69	-574.341	-946.655
	46.8	34.1797	22.583	14.0381	5.49316	0.610352	-2.74658	-13.4277	-14.9536	-27.1606	-33.2642	-46.9971	381.165	227.356	125.122	48.5229	-23.1934	-93.3838	-196.228	-256.653	-372.314	-578.613	-949.707
	46.9	32.3486	22.8882	11.5967	5.18799	-0.305176	-3.05176	-15.2588	-14.6484	-24.7192	-34.79	-46.6919	379.028	235.291	122.986	47.6074	-23.1934	-93.3838	-201.416	-257.874	-369.568	-583.801	-952.454
	47	32.6538	22.8882	13.4277	6.10352	1.2207	-3.66211	-11.5967	-17.395	-26.5503	-34.1797	-46.6919	375.061	237.427	124.512	47.3022	-24.4141	-94.2993	-204.163	-259.094	-378.418	-579.529	-951.233
	47.1	34.1797	22.8882	13.1226	7.93457	3.05176	-3.35693	-9.46045	-17.7002	-27.1606	-35.7056	-45.7764	366.516	229.797	126.343	46.3867	-26.5503	-95.52	-207.214	-258.484	-399.78	-567.932	-947.266
	47.2	33.2642	25.0244	12.207	7.93457	3.05176	-3.96729	-11.2915	-17.395	-25.9399	-34.1797	-47.9126	359.802	226.44	121.155	48.5229	-25.9399	-97.0459	-212.708	-262.451	-408.325	-564.27	-945.129
	47.3	35.4004	24.1089	12.8174	5.79834	0.305176	-3.05176	-13.7329	-16.4795	-26.5503	-33.8745	-46.9971	357.361	223.999	121.46	48.5229	-25.3296	-101.624	-210.571	-259.094	-407.715	-558.167	-939.941
	47.4	34.4849	23.4985	12.207	4.88281	0	-5.18799	-13.7329	-16.7847	-28.9917	-33.5693	-46.0815	356.445	221.558	125.732	47.9126	-24.7192	-104.065	-205.383	-258.179	-402.222	-548.706	-945.435
	47.5	31.1279	24.7192	15.2588	8.23975	1.2207	-7.32422	-13.7329	-18.6157	-30.2124	-34.1797	-47.3022	355.53	225.525	125.122	45.4712	-25.0244	-101.013	-208.13	-258.179	-397.949	-534.973	-944.214
	47.6	35.4004	25.6348	14.6484	8.8501	0.915527	-5.18799	-10.9863	-19.2261	-29.6021	-36.6211	-47.3022	357.971	226.746	126.343	44.8608	-27.1606	-102.539	-217.896	-256.653	-394.897	-524.902	-913.391
	47.7	33.2642	22.2778	10.9863	6.10352	0.610352	-1.83105	-10.376	-19.5312	-27.771	-36.9263	-47.9126	361.633	228.271	126.953	46.9971	-26.2451	-101.624	-219.421	-256.958	-389.709	-530.09	-881.042
	47.8	31.4331	22.2778	12.207	6.10352	0.610352	-1.83105	-12.8174	-20.1416	-28.6865	-39.0625	-49.1333	360.413	225.22	125.122	49.7437	-25.0244	-101.929	-212.097	-259.094	-385.132	-550.537	-864.258
	47.9	30.2124	23.1934	14.6484	6.40869	0.915527	-1.52588	-12.8174	-21.0571	-29.9072	-39.0625	-48.2178	363.159	223.083	121.155	45.166	-24.4141	-104.675	-205.383	-252.686	-390.32	-561.523	-859.07
	48	30.2124	20.752	14.3433	6.10352	1.83105	-2.74658	-12.207	-21.9727	-31.7383	-36.6211	-48.2178	367.737	219.421	117.188	43.335	-24.4141	-104.98	-204.468	-247.192	-396.423	-558.472	-845.642
	48.1	29.9072	21.9727	11.5967	5.79834	0	-4.27246	-13.4277	-21.6675	-31.7383	-36.9263	-48.5229	370.789	212.708	117.493	45.4712	-24.7192	-106.201	-203.857	-247.192	-401.917	-549.011	-854.492
	48.2	30.2124	22.8882	10.376	5.79834	1.2207	-3.66211	-12.207	-21.6675	-31.4331	-38.4521	-47.9126	373.23	205.994	122.681	47.3022	-26.2451	-107.727	-203.247	-244.446	-393.372	-542.297	-879.822
	48.3	31.4331	23.8037	8.54492	4.88281	0.915527	-5.18799	-9.76562	-20.752	-31.7383	-36.6211	-50.9644	373.84	206.604	123.901	46.0815	-27.4658	-105.591	-205.688	-247.498	-385.132	-544.128	-881.348
	48.4	31.7383	23.1934	10.9863	7.01904	0	-5.79834	-10.0708	-23.4985	-32.6538	-35.4004	-51.2695	370.178	209.351	123.291	46.3867	-27.771	-105.286	-206.299	-251.465	-390.015	-553.894	-867.92
	48.5	31.4331	22.2778	11.9019	7.01904	0.305176	-3.96729	-11.2915	-23.4985	-29.9072	-32.959	-47.9126	368.958	213.013	119.934	49.1333	-25.6348	-102.234	-204.773	-250.549	-396.423	-566.711	-859.375
	48.6	28.3813	22.583	10.376	6.71387	0.915527	-4.88281	-12.5122	-25.0244	-29.6021	-32.0435	-48.2178	372.62	215.149	119.629	48.5229	-25.6348	-99.1821	-204.468	-246.582	-404.053	-570.984	-861.816
	48.7	32.6538	20.752	10.0708	7.62939	1.2207	-6.10352	-10.6812	-25.3296	-28.9917	-33.5693	-47.3022	368.347	217.59	122.986	47.6074	-27.1606	-99.7925	-201.721	-248.718	-401.917	-575.562	-881.042
	48.8	32.6538	20.752	13.4277	5.18799	1.2207	-4.88281	-9.76562	-24.1089	-27.771	-34.79	-43.9453	357.056	220.032	120.85	49.4385	-28.9917	-101.318	-196.838	-251.465	-397.644	-574.341	-907.288
	48.9	32.6538	22.8882	12.8174	4.88281	0.915527	-5.79834	-10.376	-22.583	-27.4658	-33.8745	-45.7764	352.173	222.168	119.629	50.354	-29.6021	-102.844	-196.228	-253.601	-394.592	-570.068	-936.89
	49	32.3486	23.1934	13.4277	5.18799	-0.305176	-5.18799	-10.0708	-23.4985	-27.4658	-34.1797	-46.3867	347.9	224.304	118.713	46.9971	-24.1089	-102.844	-191.04	-249.329	-391.541	-567.017	-970.764
	49.1	32.6538	23.1934	12.207	5.49316	0.610352	-5.49316	-9.76562	-23.4985	-26.5503	-37.5366	-45.4712	351.868	221.558	122.07	46.6919	-24.4141	-99.1821	-188.599	-244.446	-394.592	-567.322	-989.685
	49.2	32.0435	20.4468	12.5122	4.57764	0.915527	-4.57764	-9.46045	-21.6675	-28.6865	-35.7056	-44.2505	362.854	223.999	124.207	49.4385	-27.771	-99.1821	-188.599	-243.53	-396.118	-557.861	-1003.42
	49.3	30.8228	18.0054	15.2588	6.10352	3.05176	-4.57764	-9.46045	-21.0571	-26.8555	-34.79	-46.0815	366.516	225.22	125.732	49.1333	-32.3486	-101.929	-189.819	-248.718	-401.611	-540.771	-1014.1
	49.4	30.8228	19.5312	15.2588	6.10352	2.74658	-4.88281	-11.9019	-21.3623	-25.9399	-34.1797	-48.8281	368.347	223.694	124.512	49.1333	-30.2124	-99.4873	-191.04	-252.38	-405.884	-547.791	-1033.94
	49.5	32.3486	21.9727	15.2588	6.71387	2.13623	-3.96729	-10.9863	-21.3623	-27.771	-35.7056	-56.4575	367.737	223.389	124.817	49.4385	-27.4658	-100.403	-191.65	-251.77	-405.579	-566.406	-1034.24
	49.6	33.5693	22.2778	14.3433	6.10352	2.13623	-2.44141	-10.0708	-21.3623	-25.9399	-37.2314	-58.5938	360.413	221.252	123.291	49.1333	-28.3813	-100.403	-193.787	-252.38	-403.137	-579.834	-1018.98
	49.7	30.5176	18.9209	13.7329	7.32422	1.83105	-4.57764	-10.0708	-18.9209	-25.0244	-36.3159	-61.3403	361.633	219.727	121.765	48.8281	-29.9072	-97.6562	-196.838	-257.263	-406.189	-582.581	-1003.11
	49.8	32.0435	18.6157	13.1226	8.8501	2.13623	-5.18799	-10.0708	-19.5312	-25.6348	-36.9263	-61.0352	366.516	223.389	125.732	48.5229	-28.9917	-96.4355	-194.397	-260.925	-408.936	-580.75	-985.107
	49.9	32.3486	20.752	12.5122	7.93457	2.13623	-3.05176	-10.6812	-20.752	-25.9399	-34.79	-57.6782	365.601	224.915	123.901	46.9971	-25.9399	-97.6562	-191.345	-258.179	-406.494	-577.698	-983.887
	50	32.3486	21.3623	13.1226	7.01904	2.13623	-1.2207	-8.8501	-20.4468	-25.0244	-34.1797	-54.6265	357.056	222.473	123.596	45.4712	-26.8555	-96.7407	-189.209	-256.653	-402.832	-573.73	-1003.72
	50.1	32.959	21.9727	12.8174	7.32422	-0.915527	-1.83105	-7.93457	-20.1416	-26.5503	-35.7056	-53.1006	351.868	222.778	125.122	46.3867	-24.4141	-98.5718	-192.871	-256.348	-397.034	-581.055	-1002.5
	50.2	33.5693	22.583	14.0381	8.23975	0	-2.74658	-8.54492	-18.9209	-26.2451	-34.1797	-51.5747	349.731	220.947	122.375	46.9971	-26.8555	-102.844	-196.228	-254.517	-393.982	-588.989	-994.873
	50.3	34.4849	21.6675	12.5122	7.62939	0.915527	-4.88281	-7.32422	-21.9727	-25.3296	-31.7383	-51.2695	349.121	221.863	120.544	43.6401	-28.9917	-100.708	-197.449	-251.77	-389.709	-591.125	-994.263
	50.4	32.6538	19.2261	10.6812	7.32422	-0.305176	-4.88281	-8.54492	-25.0244	-28.6865	-32.959	-51.8799	344.543	224.915	122.375	44.5557	-27.771	-97.6562	-196.228	-250.244	-386.963	-590.515	-987.244
	50.5	29.9072	19.2261	12.5122	7.62939	-0.610352	-2.44141	-9.76562	-25.9399	-29.9072	-32.6538	-49.7437	350.342	223.694	122.375	45.4712	-27.771	-97.9614	-195.007	-245.972	-385.132	-588.379	-986.633
	50.6	30.2124	19.2261	12.8174	7.01904	-0.610352	-1.52588	-9.76562	-24.4141	-29.2969	-32.6538	-49.7437	361.938	223.999	120.85	46.3867	-26.2451	-98.2666	-197.449	-239.563	-386.353	-584.106	-983.276
	50.7	33.2642	19.8364	14.3433	6.40869	0.610352	-2.13623	-9.15527	-25.3296	-31.4331	-32.3486	-47.6074	365.295	224.304	121.46	45.7764	-29.6021	-100.098	-195.618	-233.765	-393.372	-576.477	-963.745
	50.8	32.959	21.9727	14.0381	7.62939	1.2207	-3.66211	-10.9863	-24.7192	-29.9072	-32.3486	-43.9453	359.802	224.304	124.512	47.6074	-26.8555	-104.065	-191.65	-230.103	-395.813	-564.27	-950.317
	50.9	32.959	22.2778	10.9863	7.62939	1.2207	-3.96729	-10.9863	-21.3623	-25.9399	-35.0952	-44.5557	357.361	225.22	124.207	45.4712	-26.8555	-102.844	-192.566	-229.187	-392.456	-555.115	-955.811
	51	36.3159	20.752	14.3433	7.32422	0.915527	-3.66211	-7.93457	-19.8364	-27.4658	-35.4004	-46.6919	354.309	230.408	121.155	43.0298	-28.0762	-99.1821	-194.702	-234.68	-394.592	-549.622	-964.05
	51.1	32.3486	21.6675	13.4277	7.32422	1.2207	-3.96729	-8.54492	-20.4468	-26.2451	-36.3159	-44.8608	349.731	231.018	118.408	43.9453	-26.8555	-94.9097	-197.449	-241.394	-399.475	-549.011	-967.407
	51.2	32.3486	20.752	10.9863	7.32422	1.83105	-1.83105	-7.93457	-21.0571	-27.1606	-39.3677	-44.8608	356.445	228.271	119.934	43.9453	-27.771	-92.7734	-197.449	-242.31	-396.118	-554.504	-982.666
	51.3	35.0952	20.752	13.4277	7.32422	1.83105	-1.52588	-8.54492	-21.9727	-28.6865	-41.5039	-45.4712	362.549	227.661	120.239	43.9453	-28.6865	-93.0786	-196.838	-242.615	-389.099	-552.979	-1022.03
	51.4	34.1797	21.6675	14.0381	8.23975	1.83105	-4.57764	-10.376	-18.6157	-27.771	-40.8936	-45.7764	358.276	226.746	118.713	44.5557	-28.3813	-101.624	-197.449	-246.582	-382.08	-551.758	-1035.77
	51.5	34.4849	19.8364	11.2915	8.23975	0.305176	-4.57764	-12.207	-16.4795	-27.4658	-42.4194	-44.2505	360.107	223.999	116.272	45.4712	-28.6865	-106.506	-197.144	-248.108	-379.639	-546.57	-1036.68
	51.6	33.2642	20.752	14.9536	7.32422	0.305176	-3.66211	-11.2915	-18.9209	-28.9917	-43.0298	-44.2505	362.549	222.473	114.441	47.6074	-28.6865	-102.844	-196.228	-247.498	-380.554	-538.94	-1047.97
	51.7	32.3486	20.752	14.6484	7.32422	-1.52588	-2.74658	-10.376	-21.9727	-28.9917	-43.335	-45.7764	359.497	223.083	112.61	48.5229	-30.2124	-100.403	-193.481	-250.244	-379.028	-539.856	-1048.28
	51.8	32.3486	19.5312	13.1226	6.71387	0.305176	-0.915527	-7.93457	-23.1934	-28.6865	-43.335	-47.3022	357.361	222.168	113.525	46.0815	-32.0435	-97.9614	-201.111	-255.737	-382.69	-549.316	-1051.33
	51.9	31.4331	17.7002	13.4277	7.62939	2.13623	-3.05176	-9.15527	-20.752	-29.6021	-43.335	-45.4712	357.666	220.947	116.882	46.0815	-32.6538	-102.234	-208.74	-256.958	-385.132	-549.316	-1045.53
	52	30.2124	18.6157	11.9019	5.79834	1.83105	-5.49316	-11.9019	-21.0571	-26.5503	-40.5884	-43.0298	363.159	215.454	123.596	44.8608	-32.0435	-103.149	-206.604	-260.315	-389.709	-543.823	-1027.53
	52.1	27.771	21.3623	10.376	6.71387	1.2207	-2.44141	-10.9863	-20.1416	-27.1606	-39.0625	-43.335	369.873	209.656	127.869	42.7246	-32.0435	-103.149	-201.416	-265.808	-398.56	-536.804	-1022.95
	52.2	29.9072	21.9727	10.9863	7.62939	0.915527	-4.88281	-10.376	-21.3623	-24.7192	-38.7573	-45.7764	366.211	209.656	129.089	44.2505	-31.7383	-98.5718	-198.059	-259.094	-402.832	-536.194	-1043.4
	52.3	33.8745	20.752	11.5967	6.71387	0.610352	-4.88281	-9.76562	-18.9209	-25.3296	-38.147	-44.8608	361.938	210.266	126.953	45.166	-34.1797	-97.6562	-200.195	-250.854	-396.423	-536.804	-1060.18
	52.4	31.4331	18.0054	8.8501	3.66211	1.52588	-5.79834	-7.93457	-19.2261	-27.1606	-37.8418	-47.9126	360.413	208.74	123.291	45.4712	-36.9263	-97.6562	-198.669	-249.329	-391.541	-535.278	-1060.79
	52.5	27.1606	19.8364	10.6812	6.40869	2.44141	-5.49316	-9.76562	-20.1416	-29.2969	-36.3159	-46.0815	359.192	204.163	120.85	46.9971	-36.6211	-96.1304	-190.735	-251.77	-390.93	-538.635	-1063.54
	52.6	28.0762	19.8364	11.5967	6.71387	2.44141	-3.96729	-9.46045	-21.3623	-30.2124	-36.0107	-47.9126	363.159	206.604	122.375	46.0815	-34.1797	-96.4355	-182.8	-249.634	-389.404	-541.687	-1063.84
	52.7	32.6538	21.6675	12.207	5.18799	2.13623	-3.96729	-8.8501	-21.3623	-28.3813	-36.0107	-51.2695	364.38	208.74	126.343	43.335	-34.4849	-96.7407	-181.58	-247.498	-387.573	-542.297	-1058.96
	52.8	34.1797	21.9727	14.0381	6.71387	0.610352	-2.74658	-10.0708	-17.395	-29.6021	-34.79	-52.4902	356.75	207.825	125.427	43.9453	-34.4849	-97.3511	-180.969	-245.667	-387.573	-547.791	-1050.42
	52.9	33.2642	22.2778	14.0381	6.71387	0.915527	-4.57764	-11.2915	-17.0898	-26.5503	-36.3159	-52.4902	349.731	207.214	121.155	43.335	-36.6211	-97.3511	-184.937	-238.953	-382.996	-560.303	-1040.95
	53	32.0435	21.3623	14.3433	7.93457	2.13623	-5.18799	-10.6812	-20.4468	-25.6348	-38.4521	-50.6592	345.764	210.571	120.239	43.0298	-32.6538	-98.5718	-187.988	-239.563	-381.165	-570.374	-1036.07
	53.1	29.6021	20.1416	13.1226	8.54492	1.83105	-4.27246	-10.9863	-21.9727	-24.7192	-36.6211	-49.4385	346.375	210.266	120.544	43.9453	-29.2969	-99.1821	-188.293	-240.784	-382.385	-573.12	-1048.28
	53.2	29.9072	20.4468	12.207	9.76562	1.2207	-3.05176	-12.5122	-20.1416	-25.3296	-34.4849	-49.7437	347.29	207.825	117.493	47.6074	-31.1279	-100.403	-186.462	-240.784	-386.963	-567.627	-1054.08
	53.3	30.2124	20.1416	12.207	8.8501	2.13623	-1.2207	-13.4277	-21.9727	-26.5503	-33.5693	-48.5229	349.426	204.468	115.967	48.8281	-32.959	-100.708	-184.021	-242.31	-388.184	-561.523	-1054.38
	53.4	30.5176	22.2778	14.0381	7.93457	2.74658	-3.35693	-12.8174	-22.8882	-28.9917	-33.5693	-52.1851	355.835	205.688	116.272	45.4712	-35.7056	-98.2666	-183.716	-251.16	-385.437	-561.829	-1058.96
	53.5	32.3486	21.9727	13.4277	8.54492	3.05176	-2.44141	-11.2915	-21.3623	-28.9917	-36.3159	-52.1851	360.413	203.857	118.713	45.166	-33.5693	-95.2148	-184.326	-252.991	-384.216	-553.284	-1061.4
	53.6	32.6538	22.2778	12.207	8.8501	0.915527	-0.610352	-10.0708	-20.4468	-28.0762	-38.4521	-53.7109	359.192	200.806	117.493	43.9453	-32.3486	-93.3838	-185.852	-252.38	-383.911	-544.128	-1060.18
	53.7	30.5176	19.5312	12.207	10.6812	0	-1.52588	-9.76562	-21.6675	-28.0762	-39.0625	-56.7627	357.056	201.416	116.882	43.6401	-32.6538	-94.9097	-186.462	-247.498	-384.216	-539.246	-1050.72
	53.8	30.5176	19.8364	12.207	9.46045	0.305176	-3.35693	-9.76562	-23.8037	-28.9917	-37.8418	-53.4058	363.77	199.585	115.051	45.166	-33.5693	-93.9941	-187.683	-245.056	-386.963	-545.959	-1033.63
	53.9	32.0435	19.8364	11.9019	8.23975	0.915527	-2.13623	-8.8501	-24.1089	-28.6865	-36.9263	-54.0161	364.685	192.871	113.831	45.7764	-33.8745	-93.9941	-187.073	-249.329	-399.17	-551.453	-1033.33
	54	32.959	20.4468	10.9863	7.32422	2.74658	-2.74658	-8.8501	-23.8037	-28.6865	-37.8418	-56.7627	361.328	188.904	115.967	46.0815	-35.4004	-96.1304	-187.073	-257.263	-404.663	-555.42	-1037.29
	54.1	32.959	21.9727	13.7329	7.62939	1.2207	-2.44141	-9.76562	-22.2778	-27.1606	-38.7573	-56.7627	357.666	191.65	114.136	47.3022	-34.79	-101.624	-187.073	-255.737	-403.442	-562.439	-1049.19
	54.2	33.2642	20.752	15.8691	7.93457	0.610352	-3.35693	-9.46045	-20.752	-26.5503	-39.6729	-52.7954	353.394	195.618	114.136	48.2178	-36.9263	-102.844	-185.242	-253.906	-400.696	-563.354	-1051.94
	54.3	32.0435	22.2778	14.3433	6.40869	0.915527	-4.57764	-8.54492	-20.4468	-26.8555	-38.4521	-53.1006	355.225	203.857	117.188	46.3867	-36.9263	-100.403	-184.326	-255.127	-401.001	-552.979	-1042.48
	54.4	32.959	22.2778	12.5122	6.71387	1.2207	-5.49316	-7.32422	-23.1934	-30.2124	-37.5366	-53.1006	357.361	204.773	118.103	44.5557	-34.4849	-96.4355	-186.768	-251.77	-404.053	-550.232	-1044.01
	54.5	32.6538	21.6675	13.1226	8.23975	2.13623	-5.79834	-9.15527	-23.4985	-32.0435	-36.0107	-53.7109	362.854	202.637	119.324	45.7764	-34.79	-94.9097	-192.261	-246.582	-401.611	-550.232	-1044.01
	54.6	32.3486	21.9727	13.4277	9.15527	1.83105	-5.49316	-8.8501	-20.752	-28.3813	-34.4849	-50.0488	372.009	201.721	120.85	46.9971	-34.79	-94.6045	-189.209	-244.141	-399.475	-550.232	-1039.43
	54.7	32.3486	21.9727	13.4277	7.01904	1.83105	-3.35693	-8.8501	-19.5312	-26.8555	-31.7383	-46.0815	374.146	203.857	123.596	47.6074	-35.4004	-93.689	-188.293	-248.718	-400.391	-563.354	-1034.85
	54.8	33.2642	21.6675	14.0381	6.10352	1.2207	-3.35693	-7.62939	-18.9209	-27.771	-30.8228	-46.6919	367.432	204.468	130.31	46.6919	-33.2642	-94.9097	-187.378	-255.737	-400.391	-585.327	-1038.51
	54.9	31.4331	21.9727	14.6484	6.40869	1.83105	-4.88281	-9.76562	-18.6157	-26.5503	-29.9072	-47.6074	360.413	205.383	129.395	45.166	-32.0435	-95.52	-187.378	-262.451	-389.404	-597.229	-1035.77
	55	31.7383	21.3623	14.0381	7.93457	1.83105	-6.10352	-10.6812	-17.7002	-27.1606	-31.4331	-48.2178	368.958	205.688	124.817	46.6919	-31.1279	-95.2148	-188.599	-262.756	-378.723	-593.567	-1029.97
	55.1	28.9917	20.752	12.207	8.8501	1.52588	-5.18799	-10.0708	-17.7002	-28.6865	-35.0952	-45.4712	382.69	207.825	126.343	44.8608	-29.9072	-95.2148	-196.228	-260.62	-376.282	-596.924	-1023.56
	55.2	28.9917	22.2778	11.9019	8.8501	3.96729	-3.05176	-10.0708	-18.0054	-29.9072	-32.0435	-44.2505	380.859	209.351	123.596	46.0815	-30.5176	-95.8252	-198.975	-258.789	-375.671	-599.67	-1016.85
	55.3	32.6538	21.0571	11.9019	6.40869	3.66211	-2.44141	-9.15527	-17.395	-27.4658	-31.4331	-46.0815	371.704	209.045	123.596	45.7764	-32.3486	-95.2148	-198.669	-257.874	-375.366	-598.145	-1013.49
	55.4	33.5693	19.8364	12.5122	7.62939	2.13623	-2.44141	-11.9019	-16.4795	-28.0762	-31.1279	-46.9971	361.328	213.013	122.681	45.166	-34.79	-97.3511	-196.228	-259.705	-376.587	-585.327	-1005.55
	55.5	35.0952	20.752	12.207	8.23975	0.610352	-4.88281	-13.1226	-14.6484	-25.6348	-33.5693	-46.0815	353.699	215.454	122.07	43.6401	-37.5366	-96.1304	-196.533	-265.503	-377.808	-584.106	-1005.25
	55.6	36.0107	21.9727	12.5122	7.93457	-0.610352	-3.05176	-11.2915	-18.0054	-27.4658	-34.79	-47.3022	351.868	220.642	120.544	41.5039	-38.147	-91.2476	-194.397	-270.386	-377.502	-589.294	-1011.66
	55.7	34.79	22.2778	11.9019	8.54492	0.305176	-3.66211	-12.5122	-20.1416	-27.1606	-31.1279	-50.9644	353.394	225.22	120.85	42.1143	-38.7573	-87.2803	-193.176	-276.184	-378.418	-586.548	-1018.98
	55.8	34.79	23.1934	12.8174	7.32422	0.610352	-2.74658	-11.2915	-19.2261	-24.4141	-30.8228	-52.4902	354.309	229.187	121.765	44.5557	-36.6211	-88.1958	-194.397	-271.301	-377.197	-580.75	-1006.16
	55.9	33.5693	21.0571	12.5122	5.49316	1.2207	-3.66211	-11.9019	-17.7002	-27.1606	-31.4331	-51.5747	355.835	229.187	121.155	46.3867	-34.1797	-90.6372	-197.144	-267.029	-372.62	-574.036	-996.704
	56	32.0435	21.6675	11.2915	4.27246	2.13623	-5.49316	-13.7329	-17.395	-29.6021	-29.6021	-50.6592	357.056	228.271	120.239	45.166	-34.79	-90.0269	-202.332	-270.081	-368.958	-575.256	-992.126
	56.1	32.959	23.1934	9.76562	4.27246	1.2207	-6.40869	-11.5967	-17.0898	-29.2969	-28.6865	-50.9644	354.004	227.966	124.512	46.3867	-34.79	-92.4683	-201.721	-273.438	-368.042	-576.477	-998.23
	56.2	32.3486	23.4985	11.9019	4.88281	2.44141	-5.18799	-9.76562	-19.8364	-27.1606	-29.9072	-54.3213	357.666	228.577	126.038	46.9971	-35.0952	-90.6372	-198.669	-274.963	-373.535	-567.627	-1006.16
	56.3	30.8228	21.3623	11.9019	7.62939	1.83105	-4.88281	-9.76562	-19.8364	-28.6865	-30.2124	-57.0679	366.516	225.83	130.92	46.6919	-33.2642	-91.2476	-194.702	-271.912	-371.704	-559.082	-1020.2
	56.4	31.4331	22.2778	10.0708	7.62939	1.83105	-5.49316	-7.93457	-20.1416	-27.771	-31.4331	-54.6265	369.873	223.694	133.057	44.2505	-31.7383	-92.7734	-188.293	-272.827	-369.568	-567.932	-1028.14
	56.5	30.8228	23.4985	11.9019	5.79834	1.83105	-4.88281	-10.376	-20.1416	-29.6021	-32.0435	-53.4058	365.601	219.116	128.174	43.9453	-30.8228	-92.4683	-183.105	-277.1	-375.366	-581.36	-1036.68
	56.6	29.2969	21.0571	12.5122	7.01904	2.13623	-5.49316	-11.2915	-19.5312	-29.2969	-31.4331	-54.3213	357.056	216.675	126.038	44.2505	-32.6538	-90.6372	-180.359	-275.879	-378.418	-585.022	-1052.55
	56.7	30.2124	20.1416	14.3433	6.71387	1.52588	-4.57764	-13.1226	-20.1416	-29.6021	-31.1279	-50.9644	358.887	216.37	125.427	44.8608	-34.4849	-91.5527	-179.749	-268.25	-374.146	-580.444	-1063.84
	56.8	30.5176	19.8364	15.8691	5.49316	1.52588	-4.57764	-13.4277	-20.4468	-29.2969	-33.2642	-50.354	364.99	218.811	124.512	46.0815	-36.3159	-93.9941	-179.749	-259.094	-382.996	-576.477	-1073.91
	56.9	29.2969	21.6675	14.6484	7.62939	2.13623	-4.88281	-11.2915	-19.8364	-28.0762	-34.1797	-51.2695	365.601	221.863	121.46	43.9453	-38.147	-94.2993	-180.664	-257.263	-391.541	-582.275	-1055.3
	57	30.2124	21.9727	13.4277	8.54492	3.05176	-5.49316	-9.46045	-16.4795	-27.4658	-35.4004	-53.1006	359.802	223.694	118.713	42.1143	-35.0952	-93.3838	-180.359	-256.653	-393.372	-585.327	-1044.01
	57.1	32.3486	22.2778	11.9019	7.62939	2.13623	-3.66211	-9.15527	-17.0898	-25.3296	-34.1797	-54.6265	350.647	221.558	121.46	43.335	-30.8228	-90.332	-179.749	-256.042	-393.372	-588.684	-1061.71
	57.2	30.2124	22.2778	14.3433	7.93457	1.52588	-4.57764	-10.6812	-18.6157	-27.1606	-32.6538	-53.1006	348.206	218.811	122.375	43.335	-30.2124	-88.1958	-180.969	-252.686	-391.235	-584.412	-1077.58
	57.3	29.2969	22.8882	16.1743	7.93457	2.44141	-3.66211	-10.6812	-19.8364	-28.3813	-32.6538	-49.1333	352.173	215.454	123.291	43.0298	-32.0435	-92.7734	-190.43	-252.38	-393.372	-571.594	-1070.25
	57.4	29.2969	20.4468	14.3433	7.93457	2.44141	-1.83105	-9.15527	-19.5312	-28.9917	-33.5693	-49.4385	353.394	214.233	125.427	43.6401	-34.1797	-97.3511	-195.618	-251.77	-388.794	-567.627	-1049.8
	57.5	30.2124	20.1416	13.1226	7.32422	1.83105	-2.44141	-9.46045	-18.9209	-28.9917	-34.1797	-51.5747	357.666	209.045	125.732	44.5557	-33.5693	-101.624	-198.975	-251.465	-384.216	-580.139	-1036.07
	57.6	32.6538	20.1416	14.9536	6.71387	0.915527	-3.66211	-8.54492	-17.7002	-28.3813	-33.8745	-54.9316	360.413	206.909	122.07	43.6401	-30.8228	-103.455	-198.059	-247.803	-382.996	-588.684	-1024.48
	57.7	32.3486	19.5312	13.4277	5.79834	1.2207	-4.57764	-9.46045	-17.7002	-28.6865	-34.4849	-56.7627	354.614	205.994	122.07	43.0298	-28.0762	-104.065	-195.923	-246.887	-386.047	-588.684	-1012.88
	57.8	29.2969	20.752	12.207	6.10352	0	-4.57764	-9.15527	-18.0054	-27.4658	-36.6211	-54.0161	357.666	205.383	123.901	43.0298	-28.6865	-100.708	-192.261	-250.854	-384.521	-599.976	-1015.01
	57.9	31.4331	20.4468	11.9019	7.32422	0.305176	-4.57764	-8.23975	-21.6675	-28.3813	-34.79	-55.8472	355.225	205.688	125.427	44.8608	-31.4331	-97.3511	-192.566	-254.211	-381.47	-598.755	-1021.42
	58	32.3486	21.6675	15.564	8.23975	3.35693	-4.27246	-10.0708	-20.752	-30.8228	-31.7383	-58.8989	355.225	205.078	124.512	43.6401	-30.8228	-97.0459	-194.702	-255.737	-383.606	-594.788	-1014.4
	58.1	32.0435	22.2778	14.9536	7.62939	2.44141	-3.35693	-10.376	-17.7002	-28.3813	-32.3486	-63.1714	358.276	205.078	123.901	41.8091	-31.1279	-100.098	-198.975	-259.094	-389.709	-600.586	-993.347
	58.2	32.6538	22.8882	14.9536	5.49316	2.13623	-4.57764	-10.0708	-18.9209	-25.3296	-32.959	-61.6455	363.77	207.52	123.901	44.2505	-34.4849	-101.013	-198.975	-263.672	-398.254	-607.91	-981.14
	58.3	33.2642	23.1934	15.2588	5.79834	0.915527	-4.57764	-10.6812	-19.2261	-25.9399	-33.2642	-57.9834	361.328	208.74	121.765	44.2505	-34.4849	-96.4355	-198.669	-275.879	-409.241	-603.333	-977.783
	58.4	31.7383	22.583	14.0381	8.23975	0.915527	-5.79834	-9.76562	-19.2261	-26.8555	-32.3486	-55.542	361.938	209.656	121.155	42.1143	-34.4849	-96.1304	-198.059	-285.339	-416.26	-601.807	-979.614
	58.5	32.0435	21.9727	13.4277	6.71387	2.13623	-7.01904	-9.46045	-19.8364	-27.4658	-29.2969	-54.3213	364.685	208.13	122.375	40.5884	-32.6538	-94.9097	-194.397	-281.982	-414.734	-607.91	-972.9
	58.6	33.8745	20.752	13.4277	6.10352	2.74658	-7.93457	-10.9863	-18.9209	-28.6865	-30.5176	-54.6265	363.464	207.52	120.544	44.5557	-33.5693	-94.2993	-198.669	-276.794	-406.799	-608.521	-978.088
	58.7	32.0435	22.8882	14.6484	6.71387	0	-5.49316	-13.7329	-17.395	-31.1279	-31.7383	-52.7954	356.445	208.435	115.356	46.0815	-32.0435	-96.7407	-204.468	-276.489	-396.423	-607.3	-985.718
	58.8	32.0435	23.1934	16.1743	5.79834	0	-6.40869	-11.9019	-17.7002	-30.2124	-30.8228	-52.7954	347.595	206.909	112	43.335	-30.2124	-97.3511	-209.656	-272.827	-390.015	-596.008	-988.464
	58.9	31.4331	22.2778	16.7847	5.18799	0.305176	-7.32422	-10.0708	-18.9209	-27.771	-30.8228	-55.542	345.764	204.773	111.694	43.6401	-32.0435	-93.9941	-212.097	-270.691	-383.301	-585.327	-986.023
	59	30.5176	21.9727	14.3433	7.01904	-0.305176	-8.54492	-9.76562	-18.9209	-27.771	-31.4331	-58.2886	346.68	206.604	113.831	43.9453	-33.5693	-91.5527	-214.844	-269.165	-369.873	-578.613	-977.478
	59.1	30.2124	22.8882	13.1226	7.01904	0.305176	-5.18799	-8.54492	-21.3623	-27.1606	-32.0435	-57.6782	348.206	209.656	115.662	43.6401	-31.4331	-91.2476	-212.097	-263.367	-361.328	-578.918	-977.783
	59.2	28.6865	21.9727	11.9019	6.71387	0.915527	-4.27246	-8.54492	-20.4468	-27.4658	-31.1279	-57.0679	352.478	208.435	116.882	45.4712	-29.2969	-92.4683	-212.097	-260.315	-359.802	-577.393	-991.516
	59.3	28.3813	19.5312	11.2915	6.71387	0.915527	-5.18799	-8.8501	-20.752	-27.771	-28.6865	-57.373	354.309	206.909	117.798	47.3022	-30.8228	-90.6372	-210.876	-260.315	-357.361	-570.068	-1026.61
	59.4	31.4331	20.752	11.2915	4.88281	1.83105	-7.32422	-8.54492	-19.2261	-28.3813	-28.3813	-58.8989	350.037	204.468	121.155	47.3022	-33.2642	-89.1113	-205.994	-258.484	-361.633	-570.068	-1067.2
	59.5	32.959	21.9727	13.1226	5.49316	1.83105	-7.93457	-9.46045	-18.6157	-27.1606	-28.9917	-57.0679	349.121	199.89	119.019	45.166	-33.5693	-88.1958	-203.857	-260.01	-373.23	-568.848	-1075.13
	59.6	33.8745	22.583	13.1226	7.01904	-0.610352	-8.54492	-10.376	-18.0054	-25.9399	-29.6021	-54.3213	344.849	200.5	119.324	44.2505	-35.0952	-86.6699	-204.773	-270.691	-382.385	-564.88	-1061.1
	59.7	33.2642	22.8882	11.2915	7.32422	-0.610352	-6.40869	-9.46045	-17.7002	-27.771	-27.771	-54.0161	345.154	202.942	118.713	45.166	-36.3159	-86.6699	-205.078	-277.405	-384.216	-562.439	-1057.74
	59.8	32.3486	22.8882	12.5122	7.01904	0.305176	-5.18799	-8.23975	-16.7847	-26.8555	-28.6865	-55.542	350.037	205.078	118.103	45.4712	-35.4004	-90.6372	-206.604	-278.015	-389.099	-561.218	-1037.9
	59.9	30.5176	22.2778	12.8174	3.96729	2.74658	-7.32422	-9.15527	-17.0898	-25.0244	-30.5176	-54.0161	350.037	209.656	116.577	45.166	-35.0952	-92.7734	-204.773	-274.963	-395.813	-563.66	-1018.68
	60	32.6538	22.2778	11.5967	3.35693	2.44141	-7.32422	-10.376	-16.7847	-25.3296	-29.9072	-54.3213	350.647	207.214	115.967	45.4712	-33.2642	-91.2476	-199.585	-273.438	-405.579	-581.97	-1018.37
	60.1	32.6538	21.6675	12.5122	5.18799	0.610352	-8.8501	-11.2915	-16.4795	-25.3296	-31.1279	-58.2886	349.426	205.078	117.188	46.6919	-30.8228	-89.7217	-191.345	-273.438	-409.851	-600.891	-1027.83
	60.2	31.7383	21.0571	14.9536	6.40869	1.2207	-7.32422	-10.0708	-17.0898	-26.5503	-32.6538	-58.5938	350.952	204.163	117.798	42.7246	-31.4331	-89.7217	-184.326	-272.217	-401.611	-614.319	-1036.99
	60.3	32.3486	20.1416	14.3433	7.62939	0.610352	-6.10352	-8.54492	-16.7847	-26.2451	-34.4849	-59.8145	351.562	199.585	119.019	44.2505	-32.3486	-92.4683	-182.19	-267.334	-394.592	-617.065	-1033.33
	60.4	32.3486	20.1416	11.2915	8.23975	2.13623	-3.96729	-9.15527	-17.395	-24.4141	-35.4004	-57.0679	348.206	196.533	121.46	47.9126	-29.9072	-96.7407	-183.716	-263.977	-398.56	-610.352	-1018.37
	60.5	33.2642	20.4468	9.76562	7.01904	0.305176	-4.27246	-10.376	-19.2261	-27.771	-36.3159	-57.0679	345.459	198.059	123.596	45.7764	-31.4331	-100.403	-187.073	-268.555	-406.799	-614.319	-1024.17
	60.6	34.1797	20.1416	13.4277	5.79834	0	-5.18799	-9.76562	-20.1416	-30.2124	-34.1797	-59.5093	346.069	198.975	122.375	44.2505	-33.2642	-99.4873	-186.462	-276.794	-412.292	-620.422	-1022.95
	60.7	32.0435	19.2261	14.3433	7.62939	0.915527	-7.01904	-11.2915	-20.4468	-30.2124	-34.1797	-61.0352	352.173	199.28	120.544	45.7764	-35.7056	-96.7407	-187.378	-278.32	-419.617	-619.812	-995.789
	60.8	32.959	20.1416	14.3433	6.71387	-0.915527	-4.88281	-9.15527	-19.8364	-27.771	-33.2642	-59.5093	354.309	194.702	118.713	46.0815	-36.3159	-95.8252	-191.04	-270.996	-422.668	-618.591	-977.173
	60.9	34.79	21.9727	16.4795	5.49316	0	-3.05176	-7.93457	-18.6157	-26.2451	-33.8745	-57.0679	347.29	190.735	117.493	46.9971	-32.6538	-94.9097	-189.819	-260.62	-415.344	-617.981	-974.426
	61	33.8745	19.5312	15.2588	6.40869	0.305176	-6.10352	-7.93457	-19.5312	-27.771	-32.6538	-57.373	347.29	190.735	115.662	46.3867	-31.1279	-92.4683	-192.566	-258.484	-407.715	-628.052	-967.102
	61.1	30.2124	17.7002	14.0381	7.32422	2.13623	-5.49316	-7.32422	-18.6157	-27.1606	-32.0435	-57.9834	347.9	194.397	115.356	42.7246	-28.6865	-90.9424	-195.618	-263.977	-401.611	-648.193	-966.492
	61.2	30.5176	16.1743	15.2588	7.93457	0.610352	-5.79834	-9.15527	-18.6157	-26.2451	-32.3486	-56.4575	347.9	197.144	115.356	44.5557	-27.1606	-90.9424	-199.28	-267.639	-401.001	-664.673	-957.642
	61.3	32.3486	16.7847	15.2588	5.49316	-0.305176	-3.96729	-9.15527	-17.395	-26.2451	-31.7383	-55.8472	347.595	197.754	118.713	47.3022	-27.4658	-92.4683	-199.585	-267.944	-396.118	-662.231	-950.317
	61.4	34.4849	15.2588	13.4277	4.88281	0	-3.96729	-9.15527	-17.7002	-26.2451	-30.5176	-55.8472	344.543	197.144	119.934	46.9971	-29.9072	-95.52	-196.533	-265.808	-396.729	-651.55	-961.914
	61.5	35.0952	19.8364	12.207	5.18799	2.44141	-4.57764	-8.8501	-17.7002	-25.9399	-29.9072	-52.7954	344.238	193.176	120.85	45.4712	-29.2969	-95.8252	-191.345	-265.198	-403.137	-634.766	-988.159
	61.6	34.1797	20.752	15.2588	8.8501	0.915527	-5.18799	-7.62939	-17.0898	-26.8555	-32.0435	-51.8799	343.933	187.988	119.629	44.5557	-26.2451	-91.5527	-188.293	-268.86	-405.579	-617.065	-1013.49
	61.7	32.6538	18.9209	13.7329	8.54492	0.305176	-3.96729	-7.01904	-18.9209	-25.0244	-32.6538	-50.6592	339.05	190.735	117.493	45.7764	-28.0762	-91.2476	-193.787	-267.334	-402.222	-613.098	-1024.48
	61.8	32.959	19.8364	13.1226	7.62939	1.2207	-0.610352	-6.71387	-21.0571	-25.0244	-33.8745	-50.6592	346.985	194.397	118.103	45.166	-25.9399	-93.689	-198.364	-255.737	-395.813	-621.948	-997.314
	61.9	32.0435	20.4468	14.3433	5.79834	1.2207	-2.13623	-8.23975	-21.0571	-26.2451	-33.2642	-51.8799	355.835	195.618	118.103	46.6919	-28.6865	-92.7734	-202.332	-248.108	-386.963	-622.253	-972.595
	62	31.7383	19.5312	15.8691	6.10352	3.05176	-5.18799	-10.6812	-19.5312	-26.2451	-31.7383	-50.6592	355.835	193.176	121.155	45.4712	-30.5176	-91.5527	-206.909	-249.939	-390.625	-614.929	-980.225
	62.1	32.6538	20.4468	14.3433	5.49316	1.83105	-4.88281	-9.46045	-18.9209	-25.9399	-31.7383	-51.2695	355.225	189.819	122.681	47.3022	-32.0435	-94.6045	-202.942	-256.348	-401.001	-606.995	-983.276
	62.2	32.6538	19.5312	13.4277	4.88281	1.2207	-3.96729	-10.376	-18.9209	-26.2451	-32.3486	-52.4902	351.868	188.293	121.765	48.5229	-29.2969	-96.1304	-199.28	-262.451	-408.02	-606.689	-977.478
	62.3	34.79	20.4468	15.2588	5.79834	0.610352	-4.27246	-10.9863	-18.6157	-25.9399	-30.2124	-51.8799	348.511	189.209	121.155	48.8281	-29.2969	-96.7407	-205.994	-269.47	-419.312	-597.534	-952.454
	62.4	32.6538	20.752	13.7329	6.40869	1.83105	-1.83105	-8.54492	-17.7002	-24.7192	-31.4331	-52.7954	343.933	192.871	119.324	46.6919	-28.6865	-95.2148	-205.994	-273.132	-431.213	-585.938	-923.767
	62.5	30.8228	21.9727	12.207	9.76562	1.83105	-1.52588	-9.46045	-19.2261	-25.6348	-31.7383	-53.7109	344.238	198.669	116.272	47.3022	-28.9917	-93.689	-199.89	-265.503	-435.486	-587.158	-914.001
	62.6	30.2124	22.2778	14.3433	8.23975	1.2207	-2.13623	-10.0708	-20.4468	-25.0244	-30.8228	-49.4385	342.407	200.5	113.525	46.3867	-28.0762	-93.689	-198.059	-260.925	-429.993	-598.755	-913.391
	62.7	29.2969	20.4468	13.4277	6.71387	0.305176	-2.74658	-10.376	-21.3623	-26.2451	-32.6538	-49.4385	341.797	197.144	115.356	45.7764	-25.0244	-94.9097	-197.144	-259.705	-424.194	-609.131	-894.775
	62.8	29.9072	23.8037	13.7329	5.79834	1.52588	-3.66211	-9.46045	-21.0571	-26.8555	-31.4331	-49.7437	345.764	194.702	112.61	46.3867	-26.5503	-94.6045	-194.397	-259.705	-413.513	-606.995	-870.056
	62.9	30.2124	23.1934	12.8174	5.79834	0.915527	-3.66211	-9.15527	-20.752	-26.8555	-31.7383	-51.2695	343.323	196.228	111.694	46.0815	-27.1606	-93.9941	-196.533	-258.789	-406.494	-603.638	-846.558
	63	30.5176	22.2778	13.4277	6.40869	1.2207	-3.05176	-11.5967	-22.2778	-26.2451	-31.1279	-53.4058	338.135	192.871	111.694	42.7246	-25.9399	-92.4683	-203.552	-256.653	-406.494	-610.962	-840.454
	63.1	28.3813	21.9727	11.9019	7.93457	0.610352	-3.05176	-11.5967	-22.8882	-24.7192	-33.2642	-54.3213	339.355	193.176	110.779	41.8091	-23.8037	-94.9097	-202.942	-254.517	-404.053	-625.61	-861.816
	63.2	29.9072	22.2778	10.6812	9.15527	0.305176	-2.74658	-10.0708	-24.1089	-26.8555	-32.0435	-54.6265	345.459	194.092	106.812	43.6401	-23.8037	-95.52	-198.059	-254.822	-410.767	-640.259	-883.484
	63.3	30.2124	22.2778	14.0381	6.71387	-1.52588	-3.35693	-11.2915	-24.1089	-25.0244	-31.7383	-54.3213	344.238	195.007	108.643	44.8608	-25.0244	-97.6562	-195.923	-249.634	-419.617	-658.569	-881.653
	63.4	30.5176	21.6675	13.7329	6.10352	-0.305176	-4.57764	-12.207	-24.1089	-23.8037	-32.3486	-56.1523	336.609	198.059	111.084	42.4194	-25.3296	-97.3511	-195.007	-251.465	-425.415	-672.607	-881.958
	63.5	31.7383	22.583	11.2915	4.88281	-0.305176	-3.96729	-13.4277	-23.8037	-22.8882	-36.6211	-56.1523	335.083	201.416	112.61	42.4194	-24.1089	-98.2666	-194.092	-254.822	-427.246	-672.302	-909.119
	63.6	31.4331	21.6675	13.4277	6.40869	-3.05176	-4.57764	-12.8174	-23.8037	-22.8882	-38.4521	-56.1523	339.661	199.89	113.831	43.0298	-25.9399	-96.7407	-193.481	-254.211	-417.175	-664.978	-924.988
	63.7	30.8228	18.9209	14.0381	7.62939	-1.52588	-5.49316	-13.4277	-27.4658	-24.7192	-35.7056	-57.0679	339.966	200.806	113.831	42.4194	-27.771	-90.9424	-193.787	-256.042	-407.41	-663.757	-921.021
	63.8	30.5176	21.0571	12.8174	6.71387	1.83105	-5.49316	-12.5122	-27.4658	-25.9399	-35.0952	-57.0679	337.524	198.364	111.694	43.0298	-27.771	-86.9751	-193.176	-259.705	-407.104	-664.978	-920.41
	63.9	30.2124	22.583	12.8174	5.18799	2.13623	-5.18799	-14.3433	-25.3296	-25.3296	-32.6538	-57.0679	340.576	201.721	108.337	44.8608	-26.5503	-89.1113	-191.956	-257.568	-406.494	-653.076	-917.053
	64	32.0435	21.9727	12.5122	3.35693	0.610352	-4.57764	-15.564	-23.8037	-24.7192	-34.1797	-53.7109	344.543	202.332	109.863	43.9453	-29.9072	-93.9941	-193.176	-251.465	-399.17	-647.278	-920.41
	64.1	33.5693	21.0571	11.5967	2.74658	1.2207	-4.57764	-11.9019	-22.8882	-25.9399	-35.7056	-54.3213	341.492	201.721	111.694	43.9453	-33.5693	-90.0269	-198.669	-255.432	-397.949	-647.583	-915.527
	64.2	30.5176	21.0571	10.9863	3.35693	2.13623	-3.66211	-12.207	-22.583	-28.0762	-36.3159	-54.6265	340.271	203.247	113.525	44.5557	-31.7383	-86.6699	-199.585	-256.042	-403.137	-634.46	-917.053
	64.3	31.1279	22.8882	14.3433	7.32422	2.13623	-3.05176	-11.5967	-22.2778	-28.6865	-38.147	-54.6265	337.83	208.74	114.136	46.3867	-32.3486	-93.3838	-195.618	-255.432	-401.306	-627.136	-925.598
	64.4	32.3486	21.9727	10.0708	6.71387	-0.915527	-3.66211	-11.2915	-22.8882	-28.3813	-37.5366	-53.4058	343.323	206.909	114.136	43.9453	-28.6865	-94.9097	-192.871	-261.23	-402.222	-631.104	-939.636
	64.5	29.2969	21.6675	8.23975	4.88281	-0.610352	-3.96729	-11.2915	-22.2778	-29.2969	-37.8418	-54.0161	351.868	207.52	114.746	43.0298	-27.1606	-96.4355	-192.566	-265.503	-404.053	-638.428	-945.129
	64.6	28.0762	22.2778	11.9019	4.57764	-0.305176	-5.18799	-11.9019	-21.6675	-26.5503	-36.3159	-53.7109	356.445	205.994	115.662	43.335	-27.4658	-94.6045	-193.176	-260.315	-402.527	-649.109	-933.533
	64.7	28.9917	21.6675	13.4277	5.79834	-0.610352	-8.54492	-12.5122	-21.6675	-26.5503	-36.0107	-57.373	357.666	200.5	118.713	46.0815	-27.771	-95.52	-195.923	-257.263	-401.001	-650.635	-921.021
	64.8	29.9072	21.0571	14.6484	6.40869	-1.2207	-5.79834	-11.9019	-20.1416	-25.3296	-35.7056	-60.4248	356.445	198.669	117.188	48.2178	-27.4658	-92.7734	-199.585	-253.906	-400.391	-637.817	-914.917
	64.9	29.9072	20.752	13.7329	6.40869	-1.83105	-3.66211	-12.207	-18.9209	-26.5503	-36.3159	-57.9834	352.173	196.838	118.408	45.7764	-27.4658	-93.689	-198.059	-251.16	-388.794	-625.916	-913.391
	65	31.1279	21.3623	11.5967	5.79834	-1.52588	-4.57764	-11.9019	-20.4468	-28.9917	-35.4004	-59.2041	342.102	197.144	121.155	44.2505	-29.6021	-94.9097	-196.533	-252.38	-380.859	-622.864	-915.833
	65.1	28.9917	19.2261	12.207	7.93457	-0.915527	-4.27246	-10.0708	-18.9209	-27.4658	-34.79	-60.1196	339.355	203.247	120.239	43.9453	-31.4331	-96.7407	-195.007	-252.991	-381.165	-632.019	-910.95
	65.2	29.2969	19.2261	12.8174	7.93457	-1.2207	-4.88281	-12.8174	-19.8364	-25.0244	-38.147	-60.4248	339.355	208.74	119.324	43.9453	-30.8228	-96.1304	-194.702	-255.127	-381.47	-643.921	-916.443
	65.3	30.8228	19.8364	14.6484	7.01904	0.610352	-4.27246	-14.3433	-20.4468	-25.6348	-38.147	-59.8145	340.576	202.942	120.239	45.4712	-28.6865	-96.7407	-195.923	-257.263	-388.794	-653.687	-922.546
	65.4	29.6021	18.0054	14.0381	7.93457	0.610352	-5.18799	-13.4277	-21.3623	-25.9399	-36.6211	-60.1196	346.069	202.637	119.019	44.8608	-28.6865	-95.8252	-191.956	-257.874	-396.729	-660.706	-919.8
	65.5	28.3813	18.0054	12.5122	7.32422	0.305176	-4.88281	-11.9019	-21.9727	-26.5503	-38.147	-58.5938	350.037	206.909	115.967	44.5557	-29.2969	-91.2476	-187.073	-256.042	-405.884	-661.926	-918.884
	65.6	30.5176	19.2261	13.1226	5.79834	0.305176	-4.88281	-11.5967	-18.0054	-26.2451	-36.3159	-58.8989	353.699	208.74	118.103	44.2505	-29.2969	-88.501	-184.631	-251.16	-414.734	-656.433	-933.533
	65.7	29.2969	20.1416	13.4277	5.79834	-1.83105	-6.40869	-13.4277	-17.7002	-25.9399	-36.3159	-58.8989	353.088	210.266	117.798	45.166	-27.1606	-89.4165	-185.242	-249.634	-414.124	-652.466	-962.524
	65.8	28.9917	20.752	12.8174	6.71387	0.610352	-6.10352	-14.3433	-19.5312	-24.1089	-38.4521	-59.8145	350.647	210.266	119.324	46.9971	-25.9399	-91.5527	-187.683	-254.211	-406.799	-652.161	-970.459
	65.9	29.6021	20.1416	10.6812	6.10352	2.44141	-6.40869	-13.1226	-18.9209	-23.8037	-36.0107	-56.7627	353.394	209.656	117.798	45.166	-30.2124	-98.877	-187.683	-252.075	-408.02	-657.959	-957.947
	66	30.8228	20.1416	11.9019	6.71387	2.13623	-4.88281	-13.7329	-19.5312	-25.3296	-34.4849	-57.9834	351.257	210.876	114.136	43.0298	-33.5693	-102.539	-183.411	-248.413	-411.987	-661.926	-940.857
	66.1	28.6865	22.583	14.3433	6.40869	1.2207	-6.10352	-12.207	-19.5312	-24.1089	-33.8745	-57.373	342.407	208.435	113.22	45.166	-32.0435	-101.624	-179.749	-243.835	-412.903	-671.082	-941.467
	66.2	26.8555	22.2778	13.7329	5.49316	0.610352	-5.49316	-13.4277	-17.0898	-22.583	-35.7056	-56.7627	340.881	204.773	109.558	44.8608	-30.8228	-99.4873	-179.138	-246.582	-410.156	-675.659	-953.979
	66.3	26.8555	23.1934	14.6484	6.10352	1.2207	-6.71387	-13.4277	-18.9209	-23.1934	-37.5366	-56.1523	348.206	200.806	108.032	43.9453	-28.6865	-98.2666	-180.969	-247.498	-405.273	-672.302	-970.459
	66.4	28.9917	20.1416	10.6812	5.79834	0.610352	-7.01904	-11.9019	-20.752	-22.8882	-39.6729	-54.6265	361.328	201.721	113.525	42.1143	-27.771	-99.4873	-186.462	-248.718	-405.579	-674.133	-976.562
	66.5	28.0762	20.1416	9.15527	7.01904	-0.915527	-6.10352	-12.207	-16.7847	-24.1089	-41.5039	-53.4058	369.873	203.857	117.798	43.335	-30.2124	-102.234	-187.378	-252.991	-411.072	-673.523	-967.712
	66.6	28.0762	21.9727	10.9863	7.93457	-1.52588	-4.27246	-11.5967	-17.0898	-25.9399	-38.7573	-50.6592	367.737	207.214	115.356	41.1987	-30.5176	-100.403	-183.716	-258.789	-414.429	-669.861	-953.369
	66.7	29.2969	20.4468	11.5967	7.01904	2.13623	-3.66211	-12.8174	-19.2261	-24.7192	-39.978	-50.6592	360.718	211.792	113.22	42.1143	-29.9072	-98.877	-177.002	-265.198	-409.241	-659.18	-951.538
	66.8	30.2124	20.1416	12.207	5.49316	-0.610352	-4.57764	-11.9019	-15.2588	-22.583	-41.1987	-52.7954	359.497	215.454	113.831	42.4194	-29.6021	-98.2666	-179.443	-263.977	-398.865	-643.616	-975.037
	66.9	30.8228	21.9727	13.4277	6.10352	-3.66211	-4.27246	-12.5122	-14.3433	-22.2778	-40.8936	-51.5747	359.192	218.201	112.915	41.8091	-28.9917	-98.877	-182.495	-260.315	-393.066	-634.766	-992.432
	67	30.8228	21.0571	10.0708	7.01904	-0.305176	-6.71387	-14.6484	-16.4795	-23.1934	-41.1987	-51.2695	354.919	217.285	112.61	43.335	-28.0762	-96.7407	-184.937	-257.568	-398.254	-637.817	-999.451
	67.1	30.5176	18.9209	8.8501	7.93457	-2.13623	-5.79834	-11.9019	-16.1743	-21.6675	-40.8936	-52.7954	349.731	215.759	116.272	43.0298	-27.4658	-95.2148	-185.852	-255.432	-403.137	-649.109	-988.77
	67.2	29.9072	19.5312	10.6812	7.32422	0.305176	-3.96729	-11.9019	-16.1743	-23.1934	-39.978	-51.5747	340.271	216.98	119.934	44.8608	-25.0244	-96.1304	-188.293	-256.653	-401.306	-653.076	-982.056
	67.3	28.0762	20.752	13.7329	5.18799	2.13623	-3.35693	-13.4277	-15.564	-24.4141	-38.147	-50.9644	334.167	220.947	116.272	46.9971	-25.6348	-100.098	-186.462	-260.315	-398.56	-650.024	-992.737
	67.4	28.3813	21.9727	14.6484	6.40869	2.13623	-5.49316	-13.7329	-14.9536	-24.1089	-37.8418	-51.2695	338.44	221.863	114.441	47.9126	-28.9917	-102.234	-184.021	-258.789	-399.475	-647.583	-1004.94
	67.5	30.2124	22.8882	12.5122	4.27246	-0.610352	-5.18799	-14.3433	-15.564	-24.1089	-39.0625	-51.8799	342.102	219.421	117.188	44.5557	-28.0762	-103.76	-184.631	-256.042	-393.372	-641.785	-1015.62
	67.6	31.7383	22.8882	10.0708	3.66211	-1.2207	-5.49316	-13.7329	-15.2588	-23.8037	-36.9263	-50.9644	345.154	218.811	119.019	41.8091	-28.3813	-102.844	-184.631	-251.465	-382.08	-637.512	-1014.4
	67.7	31.7383	20.752	13.4277	2.44141	-0.305176	-6.40869	-11.2915	-15.8691	-24.1089	-34.1797	-53.1006	350.342	222.778	119.019	43.9453	-29.2969	-102.234	-185.852	-248.108	-381.47	-639.038	-1005.55
	67.8	33.2642	21.3623	13.7329	5.49316	1.83105	-5.18799	-11.5967	-16.7847	-24.7192	-35.0952	-53.4058	349.731	224.609	121.765	42.4194	-28.3813	-99.1821	-191.956	-245.056	-384.521	-635.071	-1015.01
	67.9	32.3486	20.4468	9.76562	6.10352	2.44141	-4.57764	-13.4277	-18.9209	-25.9399	-36.6211	-48.5229	351.562	218.811	122.375	43.9453	-27.771	-99.1821	-193.787	-245.972	-380.859	-627.441	-1022.34
	68	30.8228	19.8364	9.76562	5.79834	0.915527	-3.05176	-13.4277	-17.395	-26.8555	-35.7056	-49.4385	349.426	209.656	120.544	45.166	-28.3813	-101.624	-193.176	-247.803	-377.502	-627.441	-1002.2
	68.1	31.1279	19.5312	9.76562	6.10352	0.305176	-3.96729	-10.376	-15.2588	-27.1606	-37.2314	-49.4385	343.323	207.825	117.493	43.335	-29.9072	-103.455	-192.871	-249.329	-370.789	-630.798	-984.192
	68.2	32.3486	19.8364	12.207	8.8501	0	-5.79834	-10.9863	-14.0381	-25.6348	-38.7573	-50.354	339.661	207.825	113.22	42.4194	-29.9072	-105.896	-193.481	-244.141	-370.789	-632.019	-971.985
	68.3	32.959	22.8882	10.9863	7.01904	0.305176	-6.40869	-10.376	-16.4795	-23.8037	-40.2832	-51.8799	344.543	206.604	114.746	42.4194	-30.8228	-106.812	-199.28	-245.361	-370.483	-628.357	-971.375
	68.4	31.4331	22.583	11.9019	6.10352	0	-5.79834	-10.0708	-18.0054	-25.3296	-40.2832	-50.6592	351.868	206.604	115.356	44.8608	-31.7383	-108.948	-196.533	-248.413	-372.925	-632.629	-974.426
	68.5	31.7383	20.752	11.2915	6.10352	0.610352	-3.35693	-12.207	-19.5312	-26.8555	-38.7573	-48.5229	351.868	209.961	118.408	44.2505	-32.0435	-110.168	-193.176	-248.108	-373.535	-636.597	-985.413
	68.6	32.6538	19.5312	11.5967	4.27246	-1.2207	-3.66211	-12.207	-17.0898	-29.9072	-38.7573	-47.3022	348.206	212.097	119.629	45.7764	-28.6865	-108.643	-191.345	-245.056	-374.451	-630.798	-994.873
	68.7	31.1279	20.1416	10.0708	4.88281	0.915527	-4.57764	-11.5967	-18.9209	-27.4658	-36.3159	-48.2178	356.445	210.266	118.103	44.5557	-31.1279	-108.948	-188.904	-242.615	-375.366	-629.883	-985.107
	68.8	31.7383	20.752	12.207	4.88281	2.13623	-4.57764	-12.8174	-19.8364	-25.6348	-32.6538	-51.8799	364.38	208.74	120.239	43.0298	-30.2124	-108.948	-184.326	-242.31	-377.197	-628.052	-972.29
	68.9	31.7383	18.0054	12.8174	5.18799	1.2207	-3.96729	-11.5967	-19.5312	-24.7192	-36.3159	-49.7437	357.971	204.468	123.596	46.3867	-28.0762	-110.474	-180.969	-242.004	-384.521	-631.409	-986.023
	69	32.3486	18.0054	12.8174	5.49316	0	-4.57764	-9.46045	-18.9209	-28.6865	-36.9263	-49.7437	347.9	202.942	121.46	46.6919	-27.1606	-109.863	-179.443	-237.732	-393.982	-639.343	-992.126
	69.1	28.6865	16.7847	11.9019	6.71387	0.915527	-4.57764	-11.2915	-17.0898	-31.7383	-36.6211	-49.4385	344.543	204.773	118.103	46.0815	-27.4658	-107.117	-176.697	-237.122	-398.254	-630.188	-991.516
	69.2	28.9917	19.5312	11.5967	6.10352	2.74658	-3.96729	-12.8174	-17.0898	-32.0435	-37.2314	-47.6074	341.797	205.688	117.493	43.9453	-29.2969	-105.896	-179.138	-240.479	-393.982	-614.624	-996.094
	69.3	28.9917	19.8364	10.6812	6.10352	1.83105	-3.05176	-13.4277	-18.6157	-29.9072	-37.2314	-50.0488	339.661	204.773	120.239	44.2505	-28.9917	-101.318	-182.19	-240.173	-390.32	-597.229	-980.225
	69.4	32.0435	21.0571	9.76562	6.10352	1.83105	-3.05176	-12.207	-17.7002	-28.6865	-38.147	-49.7437	333.557	203.247	118.713	43.6401	-30.8228	-97.3511	-187.988	-240.784	-391.541	-592.346	-969.238
	69.5	32.6538	23.4985	12.207	4.57764	0.610352	-3.66211	-11.9019	-16.7847	-32.6538	-35.7056	-49.1333	329.895	206.909	114.746	42.1143	-30.2124	-96.7407	-198.059	-245.972	-393.372	-592.957	-970.154
	69.6	30.5176	24.4141	13.4277	5.79834	0.610352	-5.79834	-11.9019	-16.1743	-31.4331	-35.0952	-48.2178	329.59	209.656	114.746	41.5039	-27.4658	-99.7925	-201.416	-246.277	-391.846	-600.891	-962.219
	69.7	30.2124	22.2778	13.7329	9.15527	3.35693	-4.57764	-10.376	-18.0054	-31.1279	-34.1797	-49.7437	330.505	206.604	118.103	44.2505	-28.9917	-101.929	-195.923	-245.361	-393.677	-612.183	-962.524
	69.8	31.1279	21.6675	12.207	10.0708	2.13623	-2.44141	-9.76562	-20.1416	-30.5176	-33.8745	-51.2695	335.388	205.078	118.408	43.335	-29.6021	-101.318	-196.228	-245.056	-404.053	-619.812	-963.135
	69.9	28.6865	21.6675	12.207	7.93457	1.2207	-3.05176	-11.2915	-19.5312	-30.5176	-35.7056	-47.9126	344.543	211.792	116.272	46.0815	-28.9917	-101.013	-191.956	-248.718	-408.02	-609.741	-957.031
	70	28.6865	21.0571	11.9019	4.88281	2.13623	-3.96729	-12.207	-18.6157	-32.0435	-35.0952	-46.9971	352.173	213.318	114.136	47.3022	-28.3813	-99.1821	-187.378	-256.042	-404.663	-592.957	-950.928
	70.1	31.4331	22.2778	13.1226	6.10352	1.2207	-5.79834	-10.0708	-17.395	-32.0435	-33.5693	-46.9971	351.562	211.487	113.525	45.166	-29.6021	-98.5718	-188.904	-259.705	-402.222	-584.717	-953.674
	70.2	28.3813	21.9727	12.5122	5.49316	1.52588	-3.96729	-10.6812	-18.6157	-27.771	-33.8745	-45.4712	340.881	210.571	115.356	44.8608	-27.771	-97.3511	-190.735	-258.484	-399.78	-590.82	-959.167
	70.3	28.3813	22.2778	9.46045	6.71387	1.83105	-1.52588	-8.8501	-16.7847	-26.8555	-36.0107	-46.6919	328.369	211.182	111.084	43.335	-27.771	-100.098	-190.125	-254.211	-393.372	-598.755	-974.121
	70.4	28.6865	21.3623	10.0708	7.93457	0.915527	-2.13623	-7.01904	-16.1743	-27.4658	-34.79	-46.9971	323.792	213.623	109.558	43.0298	-26.2451	-99.4873	-188.904	-252.991	-384.216	-611.877	-974.426
	70.5	28.9917	19.8364	10.6812	8.54492	0.305176	-5.18799	-8.8501	-17.7002	-25.6348	-34.4849	-46.3867	331.726	211.792	111.084	42.1143	-27.4658	-99.7925	-188.904	-259.705	-379.028	-613.708	-963.135
	70.6	27.4658	19.2261	11.5967	7.93457	0	-4.27246	-12.207	-17.7002	-24.7192	-33.8745	-46.0815	334.473	209.351	112	44.8608	-31.7383	-100.708	-188.293	-262.756	-376.892	-616.15	-945.74
	70.7	26.2451	19.5312	10.376	6.40869	2.44141	-3.35693	-12.207	-19.5312	-26.8555	-32.3486	-49.7437	327.148	205.078	115.051	44.5557	-32.0435	-97.3511	-191.345	-260.62	-375.061	-633.24	-944.824
	70.8	28.3813	20.752	12.207	6.40869	1.2207	-3.05176	-10.9863	-16.4795	-25.6348	-31.1279	-51.5747	325.012	201.111	111.389	46.0815	-28.0762	-93.3838	-193.787	-252.38	-376.892	-655.212	-952.759
	70.9	31.4331	22.8882	12.8174	7.32422	0.915527	-3.66211	-7.62939	-15.2588	-24.4141	-33.2642	-50.9644	328.369	200.5	114.136	45.166	-29.2969	-96.1304	-194.397	-243.225	-381.165	-664.062	-964.966
	71	30.2124	23.4985	10.376	6.10352	0	-5.49316	-6.40869	-17.0898	-24.4141	-33.8745	-51.2695	335.999	203.247	117.493	43.9453	-27.4658	-95.52	-192.566	-240.173	-383.911	-677.795	-965.271
	71.1	26.5503	17.395	10.9863	4.57764	0.915527	-7.01904	-9.76562	-17.7002	-27.771	-34.1797	-50.9644	345.764	206.604	123.596	42.4194	-27.771	-93.9941	-194.702	-238.953	-394.592	-686.035	-969.238
	71.2	28.0762	18.0054	11.9019	3.66211	2.44141	-3.66211	-10.9863	-19.5312	-26.2451	-32.6538	-50.9644	351.257	208.435	123.596	43.6401	-29.2969	-93.0786	-198.364	-232.544	-394.287	-674.744	-995.178
	71.3	28.0762	20.4468	12.207	3.66211	3.05176	-0.915527	-10.376	-19.5312	-25.0244	-32.959	-54.0161	344.543	213.318	123.291	43.6401	-28.3813	-92.4683	-198.364	-229.492	-391.541	-653.076	-1017.76
	71.4	25.6348	20.4468	11.5967	4.27246	3.35693	-2.44141	-11.2915	-20.4468	-23.8037	-34.1797	-54.6265	342.712	215.454	122.681	43.9453	-32.0435	-91.2476	-200.5	-236.511	-390.32	-640.869	-1014.4
	71.5	27.4658	20.752	11.9019	4.57764	3.05176	-3.05176	-10.9863	-17.7002	-25.9399	-36.3159	-54.6265	342.102	214.844	123.901	46.3867	-29.6021	-91.2476	-203.552	-245.056	-390.93	-654.907	-1006.77
	71.6	29.9072	21.9727	10.0708	4.57764	2.13623	-4.57764	-10.0708	-18.0054	-26.5503	-34.79	-53.4058	339.355	215.454	123.291	45.4712	-27.771	-90.0269	-205.994	-245.667	-395.813	-668.335	-993.652
	71.7	28.3813	20.752	9.15527	5.49316	2.44141	-4.57764	-8.54492	-14.9536	-28.9917	-37.5366	-52.7954	340.576	214.844	119.019	45.4712	-28.3813	-89.4165	-203.552	-241.394	-397.644	-663.757	-987.854
	71.8	28.0762	21.0571	10.376	6.10352	2.13623	-3.96729	-8.8501	-13.4277	-27.771	-36.9263	-54.3213	347.9	210.571	118.408	46.3867	-27.4658	-88.501	-201.111	-236.816	-401.611	-652.466	-983.276
	71.9	25.3296	21.9727	12.5122	5.49316	4.27246	-3.66211	-10.376	-16.7847	-30.5176	-36.6211	-56.4575	347.29	206.909	122.681	44.2505	-27.1606	-90.332	-201.416	-233.459	-400.391	-651.55	-985.413
	72	26.2451	19.5312	8.23975	5.49316	4.27246	-5.49316	-11.5967	-18.6157	-30.2124	-37.5366	-54.6265	344.543	207.214	125.122	44.8608	-27.4658	-91.2476	-199.585	-232.544	-393.372	-659.18	-998.84
	72.1	31.4331	18.9209	10.0708	5.49316	1.52588	-6.10352	-7.62939	-17.0898	-28.9917	-36.0107	-51.8799	337.219	206.909	125.122	45.4712	-29.2969	-92.4683	-201.416	-234.375	-382.385	-671.692	-997.62
	72.2	30.5176	21.6675	12.8174	6.71387	1.2207	-2.13623	-9.46045	-17.395	-29.6021	-36.9263	-54.0161	330.811	208.13	122.681	42.1143	-30.2124	-93.3838	-197.144	-235.291	-375.061	-689.087	-974.121
	72.3	26.8555	20.4468	13.1226	8.23975	1.2207	-3.66211	-11.2915	-18.9209	-30.8228	-37.2314	-53.1006	332.947	208.13	120.544	43.0298	-28.6865	-90.9424	-198.669	-237.732	-381.165	-695.496	-963.135
	72.4	25.3296	19.2261	10.376	8.8501	3.05176	-2.44141	-8.8501	-19.2261	-29.6021	-36.3159	-52.1851	339.355	213.318	118.713	45.166	-27.1606	-87.5854	-202.332	-238.342	-394.897	-695.496	-963.135
	72.5	30.5176	19.2261	10.9863	7.62939	2.13623	-0.305176	-10.376	-20.1416	-28.6865	-37.2314	-50.354	347.29	210.571	118.408	44.8608	-25.9399	-90.9424	-202.637	-242.31	-399.17	-691.223	-961.609
	72.6	31.1279	16.1743	12.5122	5.18799	2.44141	-2.13623	-10.6812	-18.9209	-27.4658	-37.2314	-49.4385	353.394	201.416	117.798	46.6919	-24.1089	-93.9941	-204.163	-245.361	-394.592	-675.659	-942.078
	72.7	27.771	16.1743	13.7329	4.88281	0	-1.83105	-8.8501	-19.5312	-29.9072	-36.6211	-47.3022	354.919	197.754	119.934	45.4712	-26.5503	-93.3838	-200.5	-246.887	-389.404	-670.776	-927.124
	72.8	26.5503	18.6157	12.8174	7.01904	0	-3.05176	-8.8501	-21.0571	-33.2642	-39.3677	-48.5229	353.699	202.332	121.155	44.2505	-28.3813	-96.1304	-199.28	-247.803	-393.066	-671.082	-932.922
	72.9	29.9072	20.752	11.2915	7.62939	2.74658	-3.05176	-8.8501	-20.1416	-33.8745	-39.3677	-51.2695	349.426	205.383	122.07	46.3867	-29.2969	-97.0459	-198.975	-244.141	-398.254	-681.458	-952.148
	73	32.0435	20.1416	11.5967	6.40869	3.66211	-4.57764	-7.93457	-21.3623	-32.3486	-39.6729	-48.5229	346.68	207.52	125.122	45.4712	-28.3813	-96.1304	-195.923	-242.92	-397.644	-692.749	-977.478
	73.1	27.771	19.8364	9.76562	5.79834	3.96729	-4.27246	-9.76562	-21.6675	-28.6865	-42.1143	-48.5229	358.887	210.571	125.427	40.2832	-29.9072	-93.9941	-194.092	-246.277	-392.761	-687.256	-1001.28
	73.2	29.9072	20.4468	10.0708	6.10352	3.66211	-2.44141	-10.0708	-25.0244	-28.9917	-41.1987	-47.3022	368.042	217.896	124.207	39.6729	-29.6021	-92.1631	-190.735	-253.296	-387.878	-669.861	-1015.62
	73.3	30.8228	18.6157	14.0381	7.62939	2.13623	-2.13623	-8.54492	-25.9399	-30.5176	-41.8091	-48.5229	366.821	215.759	122.681	41.5039	-29.9072	-94.9097	-188.599	-256.042	-389.099	-674.133	-1020.51
	73.4	28.6865	18.6157	14.6484	7.93457	2.13623	-0.915527	-10.0708	-25.6348	-28.0762	-39.978	-46.6919	359.497	209.961	120.544	42.4194	-28.9917	-97.9614	-188.293	-249.634	-390.625	-682.068	-1008.61
	73.5	27.771	18.9209	15.564	6.40869	2.13623	-2.74658	-9.76562	-25.0244	-27.771	-39.978	-46.0815	354.614	209.656	118.103	44.5557	-26.5503	-96.7407	-190.125	-238.953	-393.677	-682.678	-991.516
	73.6	28.0762	20.4468	14.6484	5.79834	1.52588	-3.66211	-7.93457	-25.3296	-28.9917	-41.1987	-46.6919	354.919	219.421	115.662	43.6401	-28.3813	-94.2993	-195.007	-236.816	-406.189	-677.49	-965.271
	73.7	27.4658	19.8364	12.5122	7.93457	3.96729	-2.13623	-9.15527	-24.7192	-26.8555	-41.8091	-46.0815	354.309	225.22	114.746	42.4194	-27.771	-90.332	-198.975	-240.784	-411.987	-667.419	-947.571
	73.8	30.2124	20.1416	10.376	9.15527	3.66211	-2.13623	-9.76562	-24.1089	-25.0244	-42.7246	-47.9126	353.394	223.389	116.577	42.1143	-25.0244	-91.2476	-198.975	-243.225	-402.832	-661.926	-966.492
	73.9	28.9917	20.1416	12.207	7.32422	1.2207	-1.83105	-10.376	-24.4141	-26.8555	-38.7573	-47.6074	346.985	219.421	119.019	42.7246	-24.7192	-90.0269	-202.332	-246.277	-393.066	-656.433	-989.99
	74	27.771	21.3623	14.3433	7.93457	0.915527	-2.74658	-8.8501	-24.4141	-27.771	-37.5366	-44.8608	346.375	215.149	118.103	42.7246	-28.0762	-90.6372	-206.299	-252.686	-393.372	-650.33	-998.23
	74.1	29.9072	21.6675	12.207	7.01904	1.2207	-2.44141	-9.76562	-24.4141	-28.3813	-37.8418	-46.6919	348.511	217.285	120.544	42.1143	-28.9917	-92.7734	-206.299	-250.549	-391.541	-654.297	-997.009
	74.2	27.4658	19.2261	12.207	6.10352	1.2207	-4.57764	-12.5122	-25.3296	-26.8555	-38.4521	-49.1333	350.342	221.863	119.019	40.8936	-28.3813	-99.4873	-205.078	-243.225	-387.268	-654.602	-990.295
	74.3	25.9399	18.9209	12.5122	5.49316	0	-3.05176	-11.5967	-24.1089	-25.6348	-37.2314	-47.9126	350.037	221.558	116.577	41.1987	-29.6021	-101.929	-201.721	-236.816	-384.216	-643.005	-969.238
	74.4	31.4331	18.6157	12.5122	6.71387	0.305176	-3.66211	-9.15527	-21.6675	-27.4658	-38.4521	-46.9971	345.764	218.811	116.577	43.0298	-30.5176	-102.539	-202.942	-230.103	-386.658	-627.747	-956.116
	74.5	28.3813	20.4468	9.15527	7.93457	0.305176	-4.88281	-9.15527	-22.2778	-25.6348	-39.3677	-46.0815	345.459	213.928	115.356	42.7246	-29.2969	-101.929	-203.247	-225.83	-392.761	-620.422	-966.492
	74.6	30.2124	19.8364	9.76562	5.79834	1.83105	-4.88281	-8.23975	-25.3296	-26.5503	-38.7573	-44.8608	349.426	217.285	117.188	43.6401	-28.3813	-99.1821	-198.364	-224.915	-392.151	-626.526	-991.211
	74.7	28.6865	18.9209	11.9019	5.79834	2.74658	-3.35693	-7.32422	-24.7192	-27.1606	-37.5366	-44.8608	340.881	210.266	117.188	44.5557	-28.6865	-101.013	-194.702	-228.882	-389.404	-630.188	-1006.47
	74.8	28.0762	20.1416	14.0381	5.49316	1.83105	-4.88281	-8.23975	-24.1089	-27.4658	-41.5039	-45.4712	334.778	206.299	115.662	44.5557	-30.5176	-101.013	-196.838	-235.291	-384.216	-621.643	-1001.89
	74.9	29.6021	20.1416	12.8174	6.10352	1.83105	-4.88281	-10.0708	-25.0244	-25.3296	-43.335	-43.9453	335.388	206.909	115.051	44.2505	-31.7383	-98.5718	-195.923	-237.732	-387.268	-610.657	-991.821
	75	30.2124	19.8364	12.5122	3.66211	0.610352	-2.74658	-11.5967	-26.2451	-24.7192	-42.1143	-44.2505	335.388	208.435	114.746	43.6401	-30.2124	-97.6562	-193.787	-240.479	-387.268	-618.591	-990.906
	75.1	27.771	20.4468	12.5122	4.57764	1.83105	-4.27246	-9.76562	-26.8555	-27.771	-39.6729	-45.7764	337.219	209.045	116.272	41.5039	-31.4331	-101.013	-193.787	-243.225	-383.301	-618.896	-996.094
	75.2	27.1606	20.4468	13.4277	4.88281	3.66211	-6.40869	-10.9863	-26.8555	-28.6865	-39.0625	-45.166	337.524	213.013	118.408	44.5557	-30.2124	-100.098	-191.956	-241.089	-386.658	-600.891	-989.685
	75.3	31.4331	18.0054	14.9536	5.18799	2.13623	-3.35693	-10.9863	-25.6348	-31.1279	-39.0625	-43.6401	333.557	215.149	117.493	45.4712	-28.3813	-101.624	-191.956	-238.037	-395.813	-589.905	-979.919
	75.4	28.3813	18.0054	14.9536	4.57764	2.44141	-1.83105	-13.1226	-23.4985	-29.2969	-39.6729	-44.2505	332.031	213.623	119.019	43.0298	-28.0762	-100.708	-193.481	-232.849	-397.644	-598.145	-993.042
	75.5	28.9917	20.4468	11.5967	4.88281	2.44141	-2.44141	-8.8501	-21.9727	-27.771	-40.8936	-44.8608	338.135	212.708	120.85	41.5039	-28.9917	-96.4355	-191.956	-232.239	-396.729	-609.436	-1000.98
	75.6	31.4331	20.1416	10.6812	4.57764	2.13623	-4.57764	-9.76562	-21.0571	-27.1606	-38.147	-48.2178	336.304	210.571	121.155	43.0298	-31.4331	-98.5718	-191.345	-235.291	-400.696	-629.883	-985.107
	75.7	30.2124	16.7847	10.6812	6.71387	0.305176	-3.66211	-8.8501	-21.0571	-28.3813	-36.6211	-51.8799	333.557	212.708	118.408	43.335	-31.4331	-100.403	-191.65	-237.732	-413.208	-647.583	-989.685
	75.8	27.4658	17.0898	10.376	8.8501	0.610352	-2.13623	-9.15527	-23.8037	-27.771	-35.7056	-49.1333	336.914	216.37	116.272	44.2505	-31.4331	-99.7925	-191.956	-243.225	-421.448	-651.245	-988.77
	75.9	26.8555	18.9209	10.0708	8.54492	0.610352	-3.05176	-8.54492	-25.0244	-27.1606	-36.6211	-49.7437	336.914	211.792	116.272	45.7764	-31.1279	-98.877	-190.735	-250.854	-423.889	-659.485	-989.99
	76	28.6865	18.0054	11.2915	6.71387	1.2207	-3.66211	-10.376	-24.7192	-28.3813	-37.5366	-51.2695	328.369	207.214	119.324	43.9453	-31.1279	-97.0459	-188.904	-254.211	-424.805	-657.043	-1002.5
	76.1	31.1279	17.7002	11.2915	5.49316	2.44141	-6.10352	-11.5967	-22.2778	-27.4658	-37.5366	-54.6265	318.909	203.552	121.765	46.6919	-29.9072	-93.9941	-191.04	-251.77	-415.344	-640.259	-1016.24
	76.2	27.4658	17.0898	12.5122	5.18799	1.2207	-7.32422	-10.6812	-21.3623	-26.2451	-38.147	-56.7627	315.552	204.163	122.986	46.0815	-29.6021	-93.689	-196.228	-251.465	-409.241	-634.155	-1030.58
	76.3	25.0244	17.395	13.4277	6.10352	-0.610352	-4.57764	-11.9019	-21.0571	-27.771	-39.0625	-54.3213	324.402	208.74	125.732	44.5557	-28.6865	-90.9424	-192.566	-250.854	-409.851	-631.714	-1023.56
	76.4	29.6021	17.0898	15.2588	8.54492	0.305176	-4.57764	-11.2915	-21.6675	-31.7383	-36.9263	-53.7109	333.252	207.52	126.648	42.7246	-28.3813	-90.6372	-191.956	-249.939	-399.17	-630.798	-1021.42
	76.5	28.3813	18.6157	13.1226	6.71387	1.83105	-3.05176	-8.8501	-22.8882	-32.3486	-38.147	-54.6265	336.609	205.078	127.258	43.6401	-27.1606	-93.9941	-193.481	-250.244	-383.606	-627.136	-1026.92
	76.6	27.4658	16.7847	13.1226	6.40869	0.610352	-3.96729	-10.376	-22.8882	-29.6021	-39.3677	-53.1006	333.557	201.111	128.174	42.4194	-27.1606	-97.0459	-192.261	-245.361	-376.892	-621.338	-1043.4
	76.7	25.6348	18.6157	10.6812	6.40869	-1.2207	-3.05176	-9.46045	-22.8882	-28.9917	-39.0625	-52.1851	338.44	201.111	125.427	44.8608	-28.3813	-98.5718	-188.904	-244.446	-379.333	-603.943	-1040.95
	76.8	25.9399	22.583	10.376	5.79834	0.305176	-3.05176	-8.8501	-21.0571	-30.2124	-35.7056	-54.6265	350.342	204.468	125.122	45.4712	-25.9399	-97.3511	-185.242	-247.803	-395.508	-586.243	-1022.95
	76.9	26.8555	21.3623	13.7329	7.01904	0.915527	-3.66211	-8.54492	-20.752	-31.4331	-37.2314	-56.4575	351.562	206.909	126.038	42.4194	-27.4658	-94.9097	-183.716	-248.718	-404.968	-583.801	-1005.86
	77	28.6865	18.0054	14.6484	9.15527	-0.610352	-2.13623	-8.54492	-22.583	-29.2969	-36.9263	-54.0161	346.985	203.552	127.258	42.1143	-28.9917	-98.5718	-181.885	-245.667	-403.137	-581.665	-996.704
	77.1	29.9072	17.7002	14.6484	7.93457	-0.915527	-3.66211	-8.8501	-23.4985	-26.8555	-36.9263	-54.6265	345.154	203.247	128.174	44.2505	-29.9072	-102.539	-186.157	-246.887	-400.085	-578.613	-998.84
	77.2	26.8555	19.8364	12.8174	5.79834	1.2207	-3.96729	-9.46045	-23.4985	-29.2969	-36.0107	-54.0161	349.426	202.942	128.174	44.2505	-28.3813	-104.065	-190.43	-247.498	-388.184	-579.224	-1005.25
	77.3	26.2451	20.752	10.0708	6.71387	1.52588	-0.915527	-9.76562	-24.1089	-27.771	-36.0107	-51.2695	346.069	204.773	129.395	42.7246	-28.6865	-101.929	-187.988	-251.465	-376.587	-576.477	-1010.74
	77.4	27.4658	22.583	14.0381	6.10352	2.13623	-1.52588	-9.76562	-23.8037	-27.771	-35.7056	-51.5747	335.388	204.773	125.732	43.6401	-29.2969	-100.098	-184.021	-252.686	-368.652	-564.27	-1004.94
	77.5	32.959	20.752	14.0381	7.62939	0.610352	-4.27246	-11.2915	-23.4985	-28.9917	-37.5366	-49.7437	324.402	199.89	123.291	44.5557	-28.9917	-98.877	-186.157	-258.789	-362.244	-555.42	-1005.86
	77.6	28.3813	20.4468	12.5122	6.71387	0.305176	-3.35693	-8.54492	-24.1089	-25.0244	-36.3159	-49.4385	325.317	199.89	122.07	41.1987	-28.0762	-100.708	-187.073	-261.841	-360.107	-554.504	-1009.83
	77.7	26.8555	20.4468	12.207	6.71387	0.915527	-3.35693	-7.62939	-23.8037	-25.9399	-37.8418	-50.354	327.148	198.975	125.122	41.5039	-27.4658	-97.9614	-187.378	-264.587	-362.244	-555.115	-1004.33
	77.8	24.7192	20.1416	10.6812	6.71387	2.44141	-4.27246	-9.15527	-26.8555	-29.2969	-38.7573	-49.4385	328.064	201.721	126.343	41.8091	-28.3813	-97.9614	-184.021	-265.808	-364.685	-558.777	-997.925
	77.9	26.5503	18.6157	10.376	7.01904	3.35693	-4.57764	-9.15527	-25.3296	-28.6865	-37.2314	-49.1333	330.505	202.942	124.207	46.0815	-28.0762	-98.877	-181.58	-263.367	-364.99	-556.03	-1002.2
	78	29.2969	20.4468	10.0708	5.18799	-0.305176	-2.13623	-9.46045	-22.583	-26.8555	-37.5366	-48.8281	333.252	202.942	123.291	47.6074	-26.8555	-101.013	-185.242	-262.146	-363.159	-557.251	-995.789
	78.1	30.2124	21.0571	10.9863	5.79834	0	-5.18799	-8.23975	-20.1416	-25.9399	-37.8418	-49.1333	330.2	202.942	125.427	46.6919	-29.6021	-100.403	-185.852	-263.672	-367.126	-559.387	-972.9
	78.2	29.9072	21.0571	7.93457	5.49316	0.610352	-8.8501	-6.71387	-20.1416	-26.5503	-39.3677	-48.2178	327.759	203.247	124.512	44.5557	-28.9917	-96.7407	-189.514	-261.536	-373.23	-558.777	-975.037
	78.3	28.6865	19.8364	11.2915	7.93457	0.915527	-5.79834	-7.32422	-21.9727	-26.2451	-36.6211	-48.5229	326.843	204.468	124.817	43.0298	-26.5503	-95.8252	-190.43	-255.737	-379.944	-562.439	-992.126
	78.4	31.7383	18.9209	12.8174	8.54492	0	-3.66211	-8.23975	-23.1934	-27.4658	-37.2314	-51.2695	329.285	205.383	126.343	45.166	-26.5503	-96.7407	-186.462	-251.16	-376.282	-570.984	-1002.2
	78.5	28.3813	19.8364	10.6812	7.32422	-0.305176	-0.610352	-7.93457	-22.8882	-27.4658	-36.6211	-49.7437	330.811	209.045	126.038	45.4712	-25.9399	-102.539	-187.683	-246.277	-374.146	-577.393	-1015.01
	78.6	26.5503	19.5312	11.9019	4.88281	2.13623	-2.13623	-9.76562	-21.6675	-27.1606	-36.6211	-49.1333	328.979	218.201	123.596	46.0815	-28.3813	-103.76	-195.618	-246.887	-372.314	-573.73	-1026.31
	78.7	27.4658	18.0054	11.5967	4.88281	2.13623	-4.57764	-10.9863	-22.583	-27.4658	-36.6211	-48.5229	328.064	222.168	121.155	47.9126	-31.1279	-103.455	-201.111	-244.751	-368.347	-573.73	-1016.54
	78.8	29.9072	18.9209	11.9019	5.79834	0.915527	-4.57764	-9.15527	-19.2261	-27.771	-34.1797	-50.354	331.726	222.168	118.408	49.1333	-28.0762	-100.708	-202.332	-239.258	-368.347	-575.256	-998.84
	78.9	29.9072	21.0571	11.9019	5.79834	-1.52588	-4.88281	-9.76562	-17.7002	-27.4658	-35.4004	-50.0488	337.219	218.506	116.272	44.8608	-25.9399	-94.9097	-203.552	-233.154	-367.432	-571.594	-979.919
	79	30.5176	20.1416	12.207	5.79834	-1.2207	-5.49316	-12.207	-19.5312	-26.5503	-36.3159	-48.8281	345.154	216.98	117.493	43.6401	-25.9399	-92.1631	-202.942	-228.271	-365.906	-578.613	-956.116
	79.1	31.1279	19.5312	11.5967	5.49316	0.915527	-3.96729	-10.376	-19.2261	-25.9399	-33.8745	-53.1006	347.29	211.792	119.934	43.6401	-28.3813	-94.9097	-197.449	-228.577	-363.464	-587.463	-934.143
	79.2	31.1279	19.5312	11.9019	5.18799	3.66211	-4.27246	-9.46045	-20.1416	-26.2451	-32.959	-54.6265	345.154	206.299	117.493	44.8608	-30.2124	-92.1631	-193.787	-231.934	-363.77	-577.087	-925.293
	79.3	28.3813	18.9209	12.5122	4.57764	1.83105	-4.88281	-10.6812	-21.3623	-25.0244	-31.4331	-53.4058	346.68	202.942	116.882	45.7764	-28.9917	-93.9941	-189.209	-241.394	-360.718	-566.711	-923.767
	79.4	26.2451	16.7847	13.4277	5.49316	-0.610352	-1.2207	-9.76562	-18.0054	-28.0762	-34.1797	-54.6265	349.426	205.078	117.798	43.9453	-28.0762	-95.8252	-191.65	-249.023	-354.919	-563.66	-935.669
	79.5	31.7383	19.8364	12.207	6.71387	-1.2207	-3.66211	-7.93457	-16.7847	-25.0244	-34.4849	-56.4575	344.238	210.571	115.967	44.2505	-30.2124	-93.9941	-192.566	-252.38	-357.361	-562.744	-954.59
	79.6	31.7383	19.5312	10.9863	4.88281	-0.610352	-3.96729	-9.15527	-16.7847	-25.3296	-33.2642	-58.2886	343.628	218.201	114.136	44.8608	-32.0435	-91.2476	-191.65	-252.38	-364.99	-560.913	-961.914
	79.7	30.5176	19.5312	9.46045	5.49316	1.52588	-4.57764	-9.76562	-17.7002	-25.0244	-33.8745	-60.1196	346.375	213.928	115.662	45.4712	-32.0435	-93.689	-186.462	-253.296	-376.587	-561.523	-942.383
	79.8	32.0435	19.2261	11.5967	5.79834	1.52588	-4.88281	-9.46045	-19.5312	-24.1089	-33.5693	-59.8145	349.426	213.928	116.882	45.166	-30.2124	-94.2993	-181.885	-259.399	-380.554	-565.186	-920.41
	79.9	27.1606	19.2261	10.376	6.71387	1.2207	-3.35693	-8.54492	-21.3623	-25.9399	-35.0952	-61.3403	347.29	217.59	118.103	43.9453	-31.7383	-93.3838	-180.054	-262.451	-384.521	-564.27	-922.546
	80	29.6021	19.2261	11.5967	5.79834	-0.305176	-3.66211	-10.376	-21.3623	-26.8555	-37.2314	-62.8662	343.933	219.421	116.882	45.166	-33.2642	-93.9941	-181.58	-256.042	-386.353	-574.036	-925.903
	80.1	31.7383	20.1416	14.0381	7.62939	1.2207	-2.74658	-10.376	-20.1416	-27.1606	-37.5366	-65.0024	333.557	216.37	113.525	45.7764	-31.4331	-93.0786	-182.19	-248.108	-379.028	-584.717	-921.936
	80.2	32.6538	18.6157	11.9019	6.71387	-0.305176	-4.88281	-10.376	-18.6157	-25.6348	-37.8418	-67.749	334.473	219.116	109.253	43.9453	-27.771	-90.9424	-187.988	-243.53	-372.925	-587.463	-935.364
	80.3	30.5176	19.8364	12.207	5.79834	-0.915527	-6.71387	-8.54492	-19.5312	-25.3296	-40.8936	-65.918	343.018	224.304	108.643	41.8091	-29.2969	-89.1113	-193.176	-241.089	-365.906	-588.989	-958.862
	80.4	25.9399	20.4468	12.207	6.10352	1.83105	-5.49316	-7.93457	-22.8882	-31.1279	-42.7246	-66.2231	342.102	230.713	110.779	42.4194	-29.9072	-88.1958	-195.923	-238.342	-367.126	-597.839	-955.811
	80.5	29.2969	21.3623	12.5122	6.10352	1.52588	-3.66211	-8.23975	-25.3296	-28.0762	-39.978	-62.2559	338.745	236.816	112.915	43.9453	-28.9917	-88.1958	-193.176	-232.849	-366.211	-613.098	-930.481
	80.6	30.2124	19.2261	12.5122	5.49316	0.915527	-2.44141	-9.76562	-25.0244	-26.8555	-37.2314	-61.6455	339.355	231.628	116.577	47.9126	-28.0762	-90.332	-188.904	-228.271	-362.549	-619.202	-916.443
	80.7	30.2124	20.752	12.8174	5.18799	0.305176	-2.44141	-12.5122	-21.3623	-25.9399	-37.5366	-61.3403	350.037	228.882	119.324	47.9126	-26.5503	-92.1631	-187.988	-230.103	-364.99	-621.033	-935.059
	80.8	32.0435	20.1416	12.5122	5.49316	0.305176	-5.18799	-7.93457	-22.8882	-25.0244	-38.147	-59.8145	359.802	233.154	120.544	46.9971	-26.8555	-90.0269	-190.125	-236.511	-368.958	-616.76	-960.388
	80.9	31.1279	21.0571	13.1226	6.40869	1.83105	-3.66211	-7.62939	-26.5503	-25.9399	-36.9263	-57.9834	362.549	235.901	119.629	47.3022	-29.9072	-88.1958	-191.956	-245.056	-373.535	-607.605	-971.375
	81	30.8228	20.752	13.4277	8.23975	-0.305176	-4.27246	-8.54492	-28.0762	-27.4658	-39.6729	-57.0679	363.77	235.291	117.798	48.2178	-31.4331	-90.6372	-188.599	-247.803	-375.366	-597.229	-971.375
	81.1	28.9917	21.0571	9.15527	7.62939	1.83105	-3.66211	-8.23975	-26.5503	-25.3296	-40.8936	-58.5938	360.413	232.239	118.408	47.6074	-32.0435	-94.6045	-189.819	-247.192	-376.587	-583.191	-967.102
	81.2	29.9072	21.6675	9.46045	6.40869	1.83105	-3.05176	-10.376	-26.5503	-25.3296	-40.5884	-56.1523	360.718	226.746	118.713	46.3867	-30.2124	-98.5718	-191.345	-247.192	-377.197	-575.256	-952.454
	81.3	31.1279	20.1416	10.6812	7.62939	1.2207	-3.05176	-12.207	-27.1606	-25.0244	-39.3677	-51.5747	363.159	228.271	120.85	45.4712	-29.9072	-99.1821	-188.904	-249.329	-376.892	-575.867	-958.862
	81.4	27.771	19.8364	11.9019	7.32422	0.305176	-4.88281	-11.5967	-26.2451	-24.1089	-38.7573	-54.3213	363.77	230.713	119.934	47.3022	-33.5693	-100.708	-189.209	-254.211	-376.282	-579.224	-978.088
	81.5	30.8228	19.8364	11.9019	5.49316	0	-4.57764	-10.9863	-24.7192	-25.9399	-38.7573	-55.8472	364.075	227.661	115.662	47.3022	-30.5176	-100.708	-188.293	-263.672	-379.639	-591.431	-986.023
	81.6	32.0435	21.6675	12.8174	4.88281	-0.610352	-4.88281	-12.5122	-25.6348	-26.8555	-39.3677	-55.8472	366.211	228.577	116.882	47.6074	-28.3813	-98.2666	-185.242	-264.587	-383.606	-604.858	-990.906
	81.7	32.6538	23.1934	10.376	5.18799	0.305176	-5.49316	-11.2915	-24.1089	-25.0244	-40.8936	-56.4575	365.601	229.492	114.136	45.4712	-29.9072	-94.2993	-188.599	-261.536	-384.216	-607.3	-986.633
	81.8	30.2124	21.6675	9.76562	5.18799	1.2207	-4.57764	-7.32422	-23.4985	-26.2451	-40.2832	-57.373	363.77	231.934	112	45.4712	-28.6865	-93.689	-194.397	-259.705	-386.658	-610.046	-972.595
	81.9	28.6865	20.4468	9.15527	7.62939	-1.2207	-3.35693	-10.376	-23.4985	-25.3296	-39.3677	-56.7627	359.802	231.018	112.61	44.8608	-28.6865	-97.3511	-196.838	-257.874	-390.625	-620.117	-963.745
	82	28.0762	19.8364	10.0708	7.62939	0.610352	-4.57764	-11.9019	-24.7192	-26.8555	-38.147	-52.7954	356.14	227.051	118.713	44.8608	-26.2451	-99.1821	-197.144	-258.789	-390.32	-619.202	-967.407
	82.1	28.0762	21.0571	12.207	5.79834	-0.305176	-2.44141	-11.2915	-22.8882	-26.2451	-36.0107	-53.7109	355.53	224.304	124.817	44.8608	-28.9917	-101.318	-196.838	-259.705	-383.301	-615.54	-996.094
	82.2	29.9072	18.6157	14.0381	4.27246	0.610352	-5.18799	-8.8501	-23.4985	-24.7192	-35.0952	-53.7109	357.666	221.863	122.07	44.2505	-31.4331	-101.624	-192.566	-260.62	-376.282	-602.417	-1007.39
	82.3	29.2969	19.5312	10.6812	4.88281	1.52588	-7.62939	-10.9863	-21.3623	-24.4141	-36.9263	-52.7954	353.088	220.642	120.239	46.9971	-29.2969	-101.624	-191.345	-259.094	-382.08	-582.275	-993.652
	82.4	25.3296	20.752	10.9863	4.88281	-0.915527	-7.62939	-11.5967	-20.4468	-23.8037	-37.5366	-54.9316	351.562	219.116	118.103	47.6074	-29.2969	-104.065	-193.176	-251.16	-387.268	-564.27	-982.361
	82.5	27.771	19.2261	11.2915	4.57764	0	-6.40869	-11.2915	-21.3623	-26.2451	-36.9263	-53.7109	350.037	222.168	120.239	47.6074	-30.5176	-103.76	-191.345	-242.92	-385.132	-557.861	-968.628
	82.6	30.8228	18.9209	10.376	5.18799	2.13623	-5.18799	-10.0708	-20.1416	-28.3813	-34.79	-50.9644	354.614	227.356	118.713	47.9126	-28.3813	-101.624	-189.209	-240.479	-379.333	-555.42	-961.914
	82.7	28.0762	20.752	11.5967	3.66211	1.83105	-3.66211	-12.5122	-19.8364	-26.8555	-35.0952	-52.1851	356.445	232.849	116.882	47.9126	-28.0762	-97.6562	-181.274	-244.446	-371.704	-561.523	-969.543
	82.8	29.6021	22.2778	12.5122	5.18799	1.2207	-5.18799	-11.2915	-21.3623	-28.9917	-35.4004	-52.1851	354.004	227.661	116.272	45.166	-29.2969	-94.9097	-172.424	-255.432	-365.601	-573.425	-976.868
	82.9	28.9917	20.752	13.4277	4.88281	0.915527	-4.88281	-10.376	-22.2778	-26.8555	-37.5366	-53.4058	347.595	218.811	115.662	45.166	-28.9917	-96.1304	-169.678	-267.029	-364.075	-581.665	-976.257
	83	29.2969	21.0571	12.8174	5.18799	1.83105	-4.88281	-9.76562	-21.0571	-27.1606	-38.147	-54.0161	336.304	221.558	114.441	46.3867	-28.6865	-99.1821	-171.814	-267.334	-359.802	-582.886	-992.432
	83.1	29.2969	21.3623	12.5122	5.18799	2.44141	-5.18799	-10.6812	-19.5312	-26.5503	-36.6211	-54.3213	327.148	220.947	116.577	45.4712	-28.6865	-97.0459	-179.138	-259.094	-354.004	-580.444	-1037.6
	83.2	28.3813	17.7002	11.2915	6.71387	1.52588	-3.96729	-9.46045	-18.6157	-26.8555	-34.4849	-54.6265	325.928	219.421	117.188	47.3022	-27.771	-95.8252	-184.326	-248.413	-356.14	-578.613	-1068.42
	83.3	27.1606	20.4468	11.5967	8.23975	0	-4.88281	-11.2915	-20.1416	-25.9399	-33.5693	-56.7627	333.862	220.032	114.746	47.6074	-28.6865	-99.1821	-183.411	-244.751	-359.802	-573.425	-1076.66
	83.4	27.1606	19.8364	8.23975	7.01904	2.13623	-2.74658	-11.5967	-19.5312	-25.6348	-37.5366	-52.1851	340.881	218.506	114.136	46.9971	-30.2124	-98.877	-183.105	-244.446	-361.938	-561.829	-1094.06
	83.5	30.8228	19.5312	11.5967	7.32422	0.915527	-3.05176	-10.0708	-19.2261	-26.8555	-38.147	-51.5747	349.731	214.539	113.22	45.4712	-29.9072	-98.2666	-188.904	-249.329	-365.906	-556.641	-1091.31
	83.6	30.2124	21.0571	12.207	6.71387	-0.305176	-4.27246	-10.376	-18.9209	-26.2451	-36.3159	-53.7109	353.088	210.266	114.441	43.335	-28.6865	-96.7407	-196.838	-254.211	-371.704	-563.049	-1069.95
	83.7	29.6021	20.4468	8.54492	9.76562	1.83105	-6.40869	-11.2915	-19.8364	-22.8882	-36.9263	-56.7627	355.225	207.825	115.662	43.6401	-28.3813	-95.8252	-201.721	-265.808	-374.756	-568.237	-1066.28
	83.8	29.9072	20.752	8.23975	9.15527	1.2207	-4.88281	-8.23975	-18.9209	-24.7192	-38.4521	-54.3213	357.971	209.351	118.103	42.4194	-30.2124	-96.1304	-201.416	-272.522	-374.756	-567.322	-1050.72
	83.9	26.8555	19.2261	11.5967	7.01904	2.44141	-3.05176	-8.54492	-19.5312	-28.3813	-38.147	-54.9316	357.666	209.656	119.934	44.5557	-29.9072	-98.5718	-201.721	-270.081	-368.042	-568.542	-1034.85
	84	26.2451	19.2261	13.4277	6.10352	2.74658	-3.96729	-10.0708	-19.8364	-29.9072	-37.8418	-57.6782	361.328	205.383	118.408	46.0815	-27.771	-97.6562	-202.942	-263.977	-357.056	-573.425	-1022.03
	84.1	28.9917	20.752	13.7329	6.71387	0.915527	-3.96729	-10.376	-16.4795	-30.5176	-38.4521	-57.9834	359.192	207.825	113.831	45.7764	-28.3813	-98.2666	-201.721	-262.756	-354.919	-575.562	-997.925
	84.2	30.5176	21.6675	11.5967	5.79834	0.305176	-4.57764	-12.207	-16.4795	-28.9917	-38.147	-60.73	355.53	215.759	111.694	44.2505	-27.4658	-101.929	-199.89	-264.893	-361.633	-570.679	-983.887
	84.3	30.2124	19.8364	9.76562	5.49316	-1.83105	-6.71387	-11.5967	-17.395	-27.4658	-38.147	-59.2041	358.582	217.59	113.831	46.0815	-26.2451	-102.844	-198.975	-264.893	-367.432	-563.049	-988.464
	84.4	29.2969	20.1416	10.0708	5.79834	2.44141	-4.27246	-10.6812	-20.1416	-28.6865	-36.9263	-58.8989	364.99	214.844	113.831	46.0815	-29.6021	-102.539	-195.007	-262.451	-376.892	-555.115	-990.906
	84.5	30.5176	20.752	13.1226	8.23975	1.52588	-3.05176	-10.6812	-21.3623	-27.771	-37.5366	-59.5093	368.347	211.792	113.831	43.6401	-29.6021	-105.591	-187.683	-263.672	-387.878	-550.232	-986.633
	84.6	29.2969	18.0054	12.207	10.0708	2.13623	-4.27246	-10.9863	-22.583	-26.5503	-37.5366	-58.5938	365.601	206.299	115.967	45.7764	-29.9072	-107.117	-181.274	-263.367	-398.865	-550.842	-994.873
	84.7	28.3813	16.4795	10.9863	6.71387	0.610352	-4.27246	-11.2915	-21.0571	-25.9399	-36.6211	-57.9834	354.614	204.773	117.493	46.6919	-29.9072	-105.591	-179.138	-260.01	-403.442	-551.453	-1015.93
	84.8	32.0435	16.4795	10.9863	6.40869	-1.2207	-3.35693	-7.93457	-21.3623	-27.1606	-34.4849	-58.8989	343.018	206.299	113.831	44.8608	-30.2124	-106.201	-182.495	-258.789	-397.034	-545.044	-1050.72
	84.9	32.3486	18.0054	10.376	7.32422	-0.305176	-3.96729	-8.8501	-19.8364	-26.5503	-35.0952	-59.5093	344.543	206.604	113.22	46.9971	-31.4331	-107.422	-188.904	-256.348	-394.287	-538.94	-1067.5
	85	31.4331	21.6675	11.9019	7.01904	1.83105	-3.35693	-9.46045	-21.6675	-26.2451	-36.3159	-61.3403	355.835	206.909	113.22	46.3867	-33.8745	-102.844	-187.683	-257.874	-399.475	-543.213	-1054.99
	85.1	28.6865	20.752	10.6812	9.15527	2.74658	-1.83105	-9.76562	-21.3623	-25.3296	-36.9263	-57.6782	364.99	208.74	117.798	44.2505	-30.8228	-106.812	-190.735	-258.179	-402.832	-545.959	-1065.06
	85.2	30.8228	18.6157	11.9019	7.32422	-0.305176	-1.52588	-8.8501	-20.1416	-23.4985	-39.0625	-57.6782	359.497	201.721	120.239	44.8608	-31.4331	-106.201	-193.787	-252.991	-401.917	-549.316	-1085.82
	85.3	31.4331	20.4468	9.76562	6.10352	-1.52588	-3.05176	-10.376	-20.1416	-23.4985	-37.5366	-56.4575	356.445	201.416	118.103	46.0815	-32.6538	-108.948	-195.618	-248.413	-401.611	-552.979	-1080.63
	85.4	28.0762	21.0571	10.9863	6.10352	2.13623	-3.35693	-8.8501	-16.4795	-25.0244	-37.8418	-55.8472	357.361	206.299	116.577	45.4712	-32.6538	-111.389	-196.533	-245.361	-397.949	-557.556	-1055.91
	85.5	30.2124	21.3623	11.5967	6.71387	1.2207	-6.71387	-8.8501	-14.9536	-21.3623	-38.147	-56.7627	360.413	206.299	118.103	44.8608	-33.5693	-112.915	-195.618	-247.803	-391.541	-558.777	-1043.4
	85.6	31.7383	21.0571	10.6812	6.10352	1.52588	-4.57764	-8.54492	-15.2588	-23.1934	-38.7573	-58.8989	361.633	206.604	114.136	44.5557	-33.2642	-114.441	-202.637	-255.737	-386.047	-544.434	-1046.45
	85.7	32.3486	19.2261	10.0708	5.49316	0.305176	-4.88281	-9.46045	-17.395	-24.7192	-38.147	-58.5938	363.77	207.825	112.61	43.0298	-31.1279	-110.779	-207.214	-262.451	-384.216	-531.921	-1058.35
	85.8	31.1279	16.4795	10.6812	7.01904	1.83105	-5.18799	-8.8501	-17.7002	-24.7192	-39.0625	-58.8989	366.516	208.74	115.356	45.4712	-30.2124	-108.032	-203.247	-263.062	-389.099	-531.006	-1070.86
	85.9	29.9072	19.8364	11.5967	7.93457	2.44141	-4.57764	-9.15527	-17.7002	-28.0762	-38.7573	-60.73	359.192	212.097	117.493	47.3022	-32.959	-105.286	-201.111	-258.789	-392.761	-543.213	-1058.04
	86	30.8228	21.9727	10.6812	6.40869	3.05176	-4.57764	-13.1226	-17.395	-28.6865	-36.9263	-61.3403	348.511	215.149	122.375	43.6401	-31.4331	-105.286	-199.28	-255.432	-397.644	-551.758	-1032.71
	86.1	32.0435	21.6675	10.6812	5.79834	2.13623	-4.27246	-11.9019	-14.9536	-25.3296	-36.9263	-61.6455	349.731	211.792	126.038	43.6401	-32.3486	-103.455	-198.364	-257.874	-395.813	-552.063	-1016.85
	86.2	32.3486	22.8882	12.8174	3.66211	1.2207	-3.35693	-10.9863	-14.6484	-25.3296	-37.2314	-61.3403	354.004	209.351	126.343	43.9453	-32.6538	-102.844	-193.787	-261.23	-385.437	-551.147	-1012.88
	86.3	31.1279	21.9727	14.0381	6.10352	1.2207	-3.96729	-11.5967	-18.9209	-22.8882	-38.4521	-61.0352	354.919	205.994	122.07	45.7764	-32.6538	-105.286	-193.787	-262.451	-384.827	-545.959	-1019.59
	86.4	32.3486	20.752	13.7329	8.23975	3.66211	-5.49316	-10.9863	-19.5312	-24.7192	-38.147	-59.8145	362.244	205.078	120.85	43.6401	-31.4331	-106.201	-198.059	-266.418	-383.301	-538.33	-1031.8
	86.5	28.6865	21.3623	12.207	7.01904	4.27246	-1.52588	-10.6812	-17.395	-25.6348	-36.9263	-60.73	361.633	209.656	119.934	46.0815	-32.0435	-107.422	-200.806	-274.353	-386.047	-533.447	-1038.21
	86.6	29.2969	20.4468	12.207	5.18799	1.83105	-1.52588	-14.0381	-17.395	-25.9399	-33.5693	-59.8145	353.088	214.539	119.019	47.6074	-32.959	-108.032	-200.5	-271.912	-390.93	-537.72	-1040.95
	86.7	32.6538	18.9209	11.2915	4.88281	2.13623	-4.57764	-11.5967	-16.7847	-25.0244	-32.0435	-58.2886	342.407	216.064	116.882	48.5229	-32.959	-103.76	-198.975	-262.756	-387.878	-534.058	-1044.62
	86.8	32.6538	19.8364	12.207	5.79834	1.2207	-5.79834	-9.15527	-18.6157	-24.7192	-34.1797	-55.542	333.557	218.811	113.831	46.3867	-32.6538	-102.234	-200.5	-258.789	-386.963	-529.175	-1053.16
	86.9	32.0435	20.4468	12.207	7.01904	1.52588	-3.05176	-10.6812	-17.395	-25.9399	-36.6211	-54.0161	330.505	217.59	114.136	45.4712	-30.8228	-101.013	-204.468	-258.179	-389.709	-534.973	-1048.58
	87	32.3486	20.752	11.9019	6.71387	1.83105	-2.13623	-9.15527	-16.1743	-25.9399	-39.0625	-57.6782	325.928	217.285	115.051	44.2505	-29.2969	-102.234	-202.637	-251.16	-397.034	-531.311	-1034.55
	87.1	32.0435	18.9209	11.2915	4.57764	0.915527	-3.66211	-6.71387	-16.4795	-24.4141	-39.0625	-57.9834	325.623	213.013	114.441	46.0815	-31.1279	-100.708	-200.5	-245.972	-401.001	-521.545	-1032.1
	87.2	31.7383	19.2261	11.5967	7.62939	3.05176	-3.66211	-8.54492	-17.7002	-25.3296	-39.3677	-54.0161	327.148	210.266	116.882	47.9126	-29.9072	-93.9941	-201.111	-245.361	-392.761	-531.311	-1036.99
	87.3	32.0435	21.9727	11.2915	7.62939	2.13623	-3.66211	-10.0708	-19.5312	-26.2451	-38.7573	-52.1851	324.402	210.571	120.85	47.3022	-30.5176	-94.6045	-203.857	-248.718	-381.775	-548.401	-1040.65
	87.4	33.2642	20.4468	12.207	4.88281	1.83105	-3.66211	-11.9019	-18.6157	-26.5503	-38.4521	-53.4058	323.486	210.571	119.019	46.6919	-29.9072	-98.5718	-198.669	-249.634	-378.418	-551.453	-1030.58
	87.5	34.4849	19.8364	11.2915	5.49316	0.915527	-2.13623	-10.9863	-15.8691	-26.5503	-36.9263	-52.4902	323.486	209.045	116.882	47.6074	-31.7383	-99.7925	-189.514	-250.244	-386.963	-554.199	-1007.69
	87.6	33.8745	17.7002	10.376	6.71387	0.915527	-3.05176	-7.93457	-15.2588	-26.5503	-39.0625	-53.7109	320.129	210.266	115.051	48.2178	-34.79	-97.9614	-185.242	-249.634	-392.761	-554.199	-1006.16
	87.7	31.1279	18.0054	9.76562	7.93457	2.13623	-6.10352	-6.71387	-18.9209	-28.6865	-41.1987	-52.7954	319.214	209.351	114.136	46.9971	-33.2642	-94.2993	-188.599	-246.887	-391.541	-550.232	-1029.05
	87.8	30.5176	21.0571	9.76562	7.93457	1.2207	-6.40869	-9.46045	-19.2261	-28.3813	-40.8936	-54.0161	323.181	204.468	115.356	45.4712	-31.4331	-93.689	-192.566	-246.277	-393.982	-537.109	-1047.06
	87.9	33.2642	22.2778	11.5967	6.71387	0.610352	-1.83105	-11.5967	-17.395	-28.6865	-41.8091	-56.4575	329.895	205.078	116.577	45.4712	-30.8228	-95.52	-192.261	-248.718	-405.273	-525.513	-1042.79
	88	32.3486	22.8882	11.9019	5.79834	3.35693	-3.35693	-11.2915	-18.0054	-26.8555	-39.978	-56.1523	330.505	206.604	115.051	47.6074	-32.959	-96.1304	-194.092	-252.686	-415.039	-522.156	-1047.97
	88.1	32.959	22.2778	13.1226	6.40869	2.44141	-4.88281	-9.15527	-16.7847	-27.4658	-39.978	-54.0161	328.369	202.637	115.051	46.9971	-32.959	-94.6045	-195.923	-253.906	-415.344	-516.663	-1050.72
	88.2	33.2642	19.8364	12.8174	5.79834	-0.305176	-3.96729	-10.6812	-15.8691	-23.4985	-41.1987	-53.1006	324.402	203.247	116.577	43.9453	-31.4331	-90.332	-186.768	-247.803	-408.63	-515.747	-1054.99
	88.3	32.959	19.8364	10.6812	6.71387	-1.2207	-1.52588	-8.8501	-18.0054	-22.2778	-41.5039	-52.1851	314.026	210.876	115.356	43.6401	-33.2642	-89.1113	-177.917	-247.192	-410.767	-526.428	-1065.37
	88.4	30.2124	19.5312	10.6812	7.93457	-1.83105	-3.96729	-9.46045	-19.2261	-23.1934	-41.5039	-54.0161	315.247	216.37	112.915	46.0815	-31.4331	-90.332	-177.612	-248.108	-415.344	-531.006	-1061.4
	88.5	27.771	18.0054	10.6812	7.01904	3.35693	-4.88281	-9.46045	-16.7847	-23.4985	-41.5039	-55.8472	322.571	217.896	112.915	46.6919	-30.8228	-94.6045	-178.223	-245.361	-417.175	-534.973	-1048.28
	88.6	25.9399	17.395	12.207	5.49316	3.35693	-3.66211	-11.5967	-18.6157	-23.8037	-39.3677	-53.7109	329.59	217.59	114.441	47.6074	-29.2969	-97.0459	-175.171	-243.53	-417.48	-545.349	-1033.33
	88.7	29.2969	18.6157	12.207	6.40869	1.83105	-2.74658	-10.376	-17.7002	-22.8882	-39.6729	-52.7954	327.759	220.337	116.577	48.2178	-31.1279	-96.7407	-175.171	-247.192	-419.922	-565.796	-1032.1
	88.8	34.1797	18.0054	12.207	7.62939	1.2207	-3.96729	-8.23975	-18.6157	-22.583	-41.1987	-52.4902	320.129	222.168	116.577	48.5229	-32.3486	-94.6045	-177.307	-247.803	-417.175	-584.106	-1033.63
	88.9	32.3486	20.4468	14.9536	7.01904	0.305176	-3.05176	-8.8501	-19.5312	-23.1934	-42.1143	-52.7954	318.298	223.694	115.051	43.6401	-32.6538	-91.2476	-181.274	-248.413	-411.682	-585.022	-1037.6
	89	29.6021	20.1416	11.9019	8.54492	1.83105	-3.66211	-9.46045	-20.752	-24.1089	-41.8091	-53.1006	319.824	219.421	113.525	43.9453	-29.9072	-91.2476	-180.969	-251.16	-407.715	-576.782	-1056.21
	89.1	33.5693	20.4468	11.9019	8.54492	1.83105	-1.52588	-9.15527	-19.2261	-22.583	-39.3677	-53.1006	320.129	215.149	115.051	46.3867	-29.6021	-94.2993	-178.528	-256.653	-409.546	-582.886	-1081.85
	89.2	34.4849	20.1416	10.0708	7.62939	1.83105	-1.83105	-10.0708	-19.8364	-21.3623	-37.2314	-52.7954	319.824	213.318	116.272	44.2505	-28.9917	-98.2666	-176.697	-258.484	-413.818	-588.684	-1095.89
	89.3	32.3486	18.0054	9.76562	7.01904	0.305176	-4.57764	-10.0708	-16.7847	-21.0571	-35.7056	-51.5747	322.266	211.487	118.408	45.4712	-27.771	-97.3511	-177.917	-252.686	-416.565	-577.698	-1097.41
	89.4	32.0435	16.7847	10.9863	6.10352	1.52588	-3.35693	-10.376	-16.4795	-22.583	-35.0952	-54.3213	321.655	211.182	119.324	45.4712	-29.6021	-98.877	-179.749	-248.718	-414.734	-563.354	-1098.33
	89.5	33.2642	20.4468	9.76562	4.57764	1.2207	-3.05176	-9.15527	-18.0054	-22.2778	-35.7056	-56.1523	322.266	209.961	116.272	45.4712	-31.7383	-99.1821	-180.664	-247.498	-408.63	-562.439	-1090.7
	89.6	31.7383	21.0571	11.9019	6.71387	1.52588	-4.27246	-7.01904	-16.1743	-22.583	-37.8418	-54.6265	325.623	207.825	117.493	46.0815	-32.6538	-94.2993	-182.19	-243.225	-409.851	-573.73	-1111.45
	89.7	31.7383	19.5312	10.376	7.93457	0.915527	-5.18799	-8.8501	-17.0898	-23.1934	-38.7573	-56.1523	328.674	206.604	118.408	46.0815	-31.1279	-96.1304	-180.664	-237.732	-420.532	-580.444	-1127.62
	89.8	35.4004	18.6157	13.1226	5.49316	0	-5.18799	-10.6812	-15.564	-21.3623	-38.147	-56.1523	328.674	208.435	116.882	46.0815	-28.3813	-98.877	-179.749	-235.901	-432.434	-579.834	-1118.77
	89.9	32.0435	19.2261	12.8174	5.79834	0.305176	-3.35693	-10.0708	-16.1743	-21.9727	-38.147	-54.6265	332.336	212.402	114.441	45.4712	-31.7383	-100.098	-177.612	-234.375	-440.979	-577.393	-1117.86
	90	31.1279	17.7002	13.1226	4.88281	1.52588	-2.44141	-10.376	-17.7002	-24.1089	-37.2314	-54.9316	331.726	209.351	115.662	43.6401	-30.8228	-102.539	-177.002	-235.596	-435.791	-573.73	-1127.62
	90.1	31.7383	19.2261	13.1226	4.57764	2.44141	-2.44141	-12.207	-19.2261	-22.8882	-37.8418	-53.7109	335.388	208.74	118.408	43.9453	-32.3486	-105.896	-180.359	-244.751	-426.331	-576.477	-1122.44
	90.2	32.959	21.0571	14.6484	5.49316	2.13623	-4.27246	-9.76562	-15.8691	-21.9727	-37.5366	-52.1851	340.881	207.214	118.408	48.5229	-34.1797	-104.065	-182.8	-251.16	-422.058	-584.106	-1115.72
	90.3	33.2642	20.4468	14.6484	5.18799	0.610352	-3.05176	-8.23975	-16.4795	-21.0571	-38.7573	-52.4902	345.154	206.909	115.662	46.0815	-35.4004	-101.013	-184.631	-253.296	-415.649	-596.924	-1111.15
	90.4	32.959	22.2778	11.5967	5.49316	2.13623	-3.05176	-9.15527	-19.5312	-21.6675	-39.0625	-53.7109	355.835	206.604	116.577	45.4712	-32.3486	-97.6562	-182.8	-254.211	-412.903	-603.333	-1085.21
	90.5	34.4849	22.8882	10.376	8.23975	2.13623	-4.27246	-10.0708	-18.6157	-21.6675	-41.5039	-54.9316	362.854	206.299	118.408	46.0815	-31.1279	-93.3838	-178.223	-253.906	-409.851	-598.45	-1052.55
	90.6	33.8745	21.9727	12.207	6.71387	2.74658	-4.27246	-10.9863	-16.7847	-23.4985	-39.0625	-54.0161	363.464	208.13	117.798	46.6919	-32.3486	-91.5527	-179.443	-256.042	-406.494	-599.976	-1060.49
	90.7	32.3486	20.1416	13.1226	5.18799	3.66211	-2.74658	-9.76562	-17.7002	-23.8037	-37.2314	-52.7954	357.056	208.74	116.882	46.3867	-36.6211	-86.9751	-180.969	-254.517	-408.02	-603.027	-1089.48
	90.8	30.5176	21.6675	12.207	6.10352	4.27246	-3.66211	-10.6812	-16.4795	-24.7192	-39.0625	-54.0161	348.206	206.604	117.188	45.166	-36.0107	-88.501	-182.495	-245.056	-411.987	-599.67	-1102.6
	90.9	32.6538	24.1089	10.9863	7.32422	3.66211	-1.52588	-13.1226	-18.0054	-23.8037	-39.0625	-56.1523	344.238	205.078	114.441	43.0298	-34.79	-92.4683	-182.8	-241.089	-414.734	-590.21	-1087.04
	91	32.959	20.1416	14.3433	7.01904	2.13623	-3.05176	-12.5122	-19.2261	-24.4141	-37.2314	-54.9316	344.238	204.468	115.356	42.4194	-31.1279	-93.689	-184.021	-246.582	-417.48	-575.256	-1055.91
	91.1	31.7383	15.8691	11.5967	7.93457	0.610352	-3.66211	-9.76562	-18.9209	-22.8882	-36.6211	-54.6265	343.018	203.857	119.324	43.6401	-31.1279	-95.8252	-185.242	-249.329	-422.668	-564.27	-1033.02
	91.2	32.0435	16.4795	10.6812	5.49316	0.915527	-3.05176	-10.0708	-20.1416	-25.0244	-35.0952	-54.3213	345.459	206.909	122.07	45.166	-33.5693	-94.9097	-191.956	-245.972	-416.565	-565.491	-1012.88
	91.3	29.2969	18.9209	12.5122	6.40869	1.2207	-2.13623	-11.2915	-18.9209	-27.1606	-33.5693	-53.7109	351.257	208.435	123.291	44.2505	-32.0435	-92.4683	-191.65	-241.089	-411.682	-563.354	-1004.64
	91.4	28.6865	19.5312	10.376	7.32422	2.44141	-2.13623	-10.376	-17.395	-28.9917	-36.3159	-53.4058	351.868	212.708	122.375	45.166	-30.5176	-94.2993	-188.904	-232.849	-419.617	-559.998	-1014.4
	91.5	30.5176	22.2778	12.5122	5.79834	2.44141	-3.05176	-10.6812	-19.8364	-26.5503	-36.6211	-53.4058	353.699	216.064	119.324	45.166	-31.1279	-98.2666	-188.293	-229.187	-419.617	-558.472	-1030.88
	91.6	31.4331	22.8882	12.8174	3.66211	1.83105	-4.27246	-8.8501	-20.4468	-24.7192	-34.79	-54.0161	355.835	216.37	117.188	46.0815	-32.959	-97.6562	-187.988	-230.408	-414.429	-565.186	-1037.29
	91.7	29.2969	20.752	12.5122	4.88281	1.83105	-7.01904	-9.46045	-18.9209	-27.771	-33.2642	-54.3213	357.056	214.844	116.882	46.0815	-33.5693	-96.4355	-186.157	-236.206	-414.429	-576.477	-1040.04
	91.8	31.1279	20.4468	12.207	5.49316	3.66211	-5.79834	-11.2915	-18.6157	-28.0762	-32.6538	-51.8799	358.887	212.708	119.019	45.7764	-31.1279	-96.1304	-186.768	-242.31	-421.143	-586.548	-1051.64
	91.9	28.6865	20.1416	9.46045	5.18799	4.27246	-4.57764	-11.5967	-19.5312	-27.771	-33.5693	-53.7109	348.206	213.318	119.019	46.0815	-29.6021	-97.9614	-187.378	-248.413	-418.091	-594.788	-1048.89
	92	30.8228	18.9209	14.3433	6.10352	1.83105	-6.10352	-10.9863	-17.395	-29.6021	-34.79	-54.0161	341.492	218.811	116.882	46.0815	-27.4658	-97.3511	-188.904	-245.972	-411.072	-595.703	-1036.07
	92.1	32.6538	17.7002	13.1226	5.49316	1.2207	-4.88281	-11.2915	-17.7002	-28.3813	-34.4849	-53.7109	341.492	217.896	116.272	45.4712	-28.9917	-97.9614	-191.956	-243.225	-410.461	-586.243	-1022.95
	92.2	31.4331	20.1416	11.9019	4.88281	2.44141	-5.49316	-13.4277	-18.6157	-26.2451	-35.0952	-54.3213	345.764	214.844	115.051	44.2505	-28.9917	-98.877	-190.125	-242.004	-407.715	-572.51	-1017.46
	92.3	32.0435	20.4468	10.9863	7.62939	1.83105	-6.40869	-13.1226	-19.2261	-26.5503	-36.9263	-56.4575	346.985	215.149	114.136	42.7246	-28.3813	-95.2148	-191.04	-246.582	-408.63	-565.796	-1029.05
	92.4	30.2124	17.7002	9.76562	7.32422	0.610352	-4.57764	-13.4277	-20.752	-26.2451	-35.7056	-57.373	338.745	216.98	113.525	43.335	-30.8228	-93.9941	-191.956	-246.887	-411.377	-562.744	-1045.53
	92.5	28.9917	17.0898	12.5122	8.54492	0.915527	-4.88281	-12.5122	-22.583	-24.7192	-35.7056	-54.0161	331.116	219.727	113.22	46.6919	-31.1279	-97.9614	-195.923	-241.089	-410.156	-568.542	-1051.03
	92.6	28.3813	19.2261	12.5122	7.32422	0.915527	-3.96729	-13.7329	-20.752	-24.4141	-36.3159	-50.0488	329.59	217.59	116.272	48.2178	-29.9072	-104.37	-197.144	-235.901	-408.63	-573.73	-1050.42
	92.7	29.6021	18.9209	11.5967	4.57764	0	-3.05176	-14.9536	-21.0571	-25.0244	-36.3159	-52.4902	333.862	214.233	116.272	46.9971	-28.9917	-105.591	-193.176	-234.68	-412.292	-567.017	-1054.38
	92.8	30.2124	19.8364	11.5967	2.74658	-1.83105	-4.27246	-13.1226	-18.9209	-24.1089	-35.4004	-56.1523	337.83	213.928	118.713	46.0815	-29.2969	-102.539	-192.261	-233.765	-420.227	-563.049	-1044.31
	92.9	30.5176	19.5312	11.9019	3.66211	-2.13623	-7.01904	-13.7329	-16.4795	-22.8882	-35.7056	-57.0679	338.135	211.487	116.272	45.166	-30.2124	-99.4873	-192.261	-232.849	-433.044	-560.303	-1031.49
	93	30.8228	19.8364	13.1226	3.96729	0	-4.88281	-12.8174	-18.0054	-23.8037	-36.3159	-56.1523	344.238	212.708	113.831	44.2505	-30.5176	-100.403	-194.702	-232.544	-437.317	-554.199	-1023.25
	93.1	30.2124	21.3623	12.8174	6.10352	3.05176	-6.40869	-11.2915	-18.9209	-24.7192	-37.5366	-55.542	351.868	210.266	115.051	45.7764	-29.2969	-101.318	-196.228	-231.018	-427.551	-553.894	-1023.86
	93.2	30.2124	19.5312	10.9863	6.71387	3.05176	-3.96729	-12.207	-18.9209	-25.9399	-37.5366	-53.4058	354.004	210.266	117.798	46.3867	-28.0762	-103.149	-197.449	-231.323	-411.072	-556.03	-1030.27
	93.3	31.4331	17.7002	10.9863	6.40869	2.13623	-3.66211	-14.3433	-16.4795	-25.0244	-36.6211	-50.6592	351.868	207.825	117.493	47.3022	-28.6865	-101.929	-197.144	-236.816	-400.391	-560.913	-1025.39
	93.4	29.9072	21.0571	12.5122	5.49316	2.74658	-5.18799	-14.9536	-17.0898	-25.3296	-36.0107	-52.1851	347.9	210.876	115.662	44.8608	-28.0762	-99.1821	-194.702	-244.141	-395.813	-568.848	-1013.49
	93.5	29.2969	21.9727	13.1226	5.49316	2.13623	-5.49316	-14.3433	-17.7002	-25.6348	-34.1797	-52.4902	352.783	213.318	116.272	46.0815	-27.4658	-94.9097	-187.683	-247.803	-391.846	-570.374	-1013.79
	93.6	28.6865	21.0571	13.4277	5.49316	0.305176	-5.18799	-12.8174	-17.395	-25.9399	-35.7056	-54.3213	355.225	211.182	119.629	46.3867	-27.771	-92.7734	-181.274	-249.634	-389.099	-568.542	-1025.7
	93.7	28.9917	18.0054	13.1226	7.01904	-0.305176	-3.35693	-11.2915	-18.6157	-25.0244	-38.147	-55.542	352.478	209.961	119.324	47.3022	-27.1606	-94.6045	-176.392	-247.192	-385.437	-564.575	-1028.44
	93.8	27.4658	16.7847	13.4277	6.40869	-1.52588	-0.915527	-11.5967	-17.395	-27.4658	-37.2314	-56.1523	354.004	213.928	117.188	47.6074	-27.4658	-97.3511	-173.34	-243.835	-383.301	-560.608	-1020.81
	93.9	26.5503	19.5312	11.5967	5.49316	-0.610352	-2.44141	-15.2588	-17.0898	-29.6021	-36.6211	-55.8472	356.445	214.539	114.136	46.0815	-26.5503	-99.7925	-171.509	-245.361	-388.794	-550.232	-1025.39
	94	27.4658	21.0571	12.207	6.71387	2.74658	-5.18799	-14.6484	-18.6157	-29.6021	-36.3159	-57.9834	358.582	212.708	113.831	46.3867	-25.6348	-95.52	-172.119	-245.972	-393.066	-536.804	-1040.95
	94.1	31.7383	20.1416	10.9863	4.57764	2.74658	-4.88281	-13.7329	-18.6157	-28.6865	-35.7056	-57.373	359.802	210.876	116.272	46.6919	-27.4658	-93.9941	-173.95	-248.413	-391.541	-531.006	-1033.63
	94.2	32.3486	18.9209	10.6812	3.05176	-0.610352	-4.27246	-12.5122	-17.0898	-26.5503	-36.3159	-55.542	362.549	211.487	117.798	46.3867	-28.9917	-90.9424	-172.424	-255.737	-391.846	-531.311	-1016.54
	94.3	30.2124	18.0054	12.5122	4.27246	-1.2207	-4.88281	-13.4277	-16.1743	-27.1606	-37.8418	-57.373	365.601	215.759	118.408	43.6401	-26.5503	-89.4165	-175.476	-257.263	-392.456	-540.771	-1014.1
	94.4	26.8555	18.6157	13.1226	4.88281	0.915527	-4.57764	-12.8174	-21.3623	-29.9072	-35.7056	-56.4575	362.244	216.064	115.967	45.166	-26.5503	-92.1631	-179.138	-251.77	-391.235	-547.485	-1026.31
	94.5	27.4658	18.0054	12.5122	6.71387	2.74658	-3.96729	-13.4277	-22.2778	-30.8228	-33.8745	-57.0679	357.971	214.844	112.61	44.8608	-26.8555	-95.2148	-180.664	-251.16	-387.878	-545.959	-1021.73
	94.6	29.2969	17.395	11.9019	6.40869	2.13623	-4.27246	-13.7329	-19.2261	-30.8228	-34.79	-56.4575	356.14	222.473	114.441	46.0815	-26.5503	-95.52	-182.8	-250.854	-384.521	-542.908	-1000.67
	94.7	29.2969	15.2588	12.5122	4.57764	0.610352	-3.96729	-13.4277	-16.1743	-31.4331	-36.6211	-54.6265	357.361	222.168	115.051	48.8281	-29.9072	-96.7407	-182.8	-255.432	-380.554	-544.434	-987.244
	94.8	30.2124	16.4795	12.5122	3.66211	0.610352	-4.88281	-10.9863	-16.7847	-32.0435	-38.4521	-55.542	354.309	216.98	114.136	47.3022	-28.3813	-91.5527	-184.021	-257.263	-371.704	-555.115	-992.432
	94.9	32.6538	17.0898	12.207	4.57764	0.915527	-5.18799	-7.93457	-18.6157	-32.3486	-40.8936	-54.3213	351.562	214.844	114.441	46.9971	-27.771	-87.5854	-187.988	-256.653	-371.094	-566.101	-1021.42
	95	32.959	17.0898	11.2915	5.79834	0	-5.18799	-8.54492	-18.9209	-33.8745	-41.1987	-52.1851	354.919	213.623	116.882	48.5229	-29.6021	-87.8906	-188.599	-256.348	-375.671	-585.938	-1044.62
	95.1	32.959	16.4795	12.207	7.62939	0	-5.79834	-8.8501	-18.6157	-31.7383	-38.7573	-53.1006	353.699	216.675	118.103	48.8281	-31.1279	-87.2803	-188.904	-256.958	-382.69	-611.572	-1050.11
	95.2	32.3486	18.6157	12.207	7.01904	1.83105	-3.66211	-8.8501	-18.9209	-32.6538	-38.147	-53.1006	345.459	221.863	119.324	48.8281	-31.1279	-85.4492	-188.904	-256.958	-385.437	-628.662	-1036.99
	95.3	32.0435	18.9209	12.207	4.88281	2.74658	-3.66211	-10.376	-19.5312	-32.959	-40.2832	-53.1006	339.966	223.999	121.765	49.4385	-33.2642	-85.144	-188.293	-261.536	-378.418	-623.779	-1013.79
	95.4	32.3486	18.0054	10.6812	3.35693	3.96729	-4.57764	-9.76562	-19.5312	-34.4849	-41.8091	-52.1851	343.323	223.999	119.934	48.2178	-32.0435	-83.9233	-186.157	-264.282	-374.146	-605.469	-989.99
	95.5	33.5693	18.0054	10.0708	4.57764	2.13623	-7.32422	-9.76562	-15.8691	-32.959	-39.0625	-51.5747	343.628	225.22	118.103	47.3022	-30.8228	-82.0923	-185.547	-258.789	-380.249	-604.248	-984.497
	95.6	32.3486	19.5312	9.46045	4.27246	1.83105	-7.32422	-9.76562	-14.9536	-33.2642	-38.7573	-51.2695	341.187	227.661	118.713	47.9126	-30.2124	-81.7871	-179.443	-257.263	-379.028	-611.572	-990.601
	95.7	32.959	21.9727	10.376	6.71387	2.44141	-6.10352	-9.76562	-18.6157	-32.3486	-40.5884	-52.7954	343.323	220.947	116.882	46.0815	-31.7383	-82.0923	-179.749	-258.789	-369.568	-613.098	-995.178
	95.8	32.3486	21.6675	9.46045	7.93457	2.13623	-5.79834	-9.46045	-20.1416	-33.2642	-41.1987	-54.6265	345.154	213.623	119.019	46.0815	-32.3486	-82.7026	-184.326	-264.893	-361.633	-617.676	-984.192
	95.9	29.9072	20.1416	10.0708	6.10352	1.52588	-3.96729	-11.9019	-22.8882	-35.7056	-37.2314	-54.3213	351.868	211.792	115.662	46.0815	-29.9072	-83.313	-186.768	-272.827	-361.023	-603.333	-1001.28
	96	30.5176	19.2261	11.9019	7.93457	2.74658	-6.10352	-11.5967	-20.1416	-36.6211	-35.4004	-55.8472	354.614	210.571	111.694	46.6919	-29.2969	-84.5337	-191.65	-279.846	-361.023	-584.717	-1032.71
	96.1	31.4331	21.6675	13.1226	6.40869	2.13623	-5.49316	-10.0708	-18.9209	-33.2642	-36.6211	-56.1523	355.53	211.182	111.389	48.5229	-29.2969	-88.501	-191.65	-285.95	-363.464	-582.886	-1034.55
	96.2	32.3486	21.6675	12.8174	4.88281	0.610352	-5.49316	-10.376	-16.7847	-34.1797	-37.8418	-55.8472	358.582	206.299	112	50.0488	-29.6021	-89.1113	-189.209	-287.781	-374.756	-591.431	-1011.35
	96.3	30.8228	20.752	11.9019	6.10352	-0.610352	-4.27246	-10.376	-17.7002	-34.1797	-36.9263	-57.373	364.38	209.656	113.831	46.0815	-28.6865	-90.332	-187.683	-284.119	-379.639	-591.736	-986.938
	96.4	30.8228	19.2261	10.9863	6.71387	-0.610352	-3.05176	-10.376	-16.7847	-30.8228	-36.3159	-58.8989	368.958	208.74	111.389	47.3022	-26.8555	-88.8062	-188.293	-276.184	-386.353	-587.769	-979.614
	96.5	29.9072	20.4468	9.76562	5.79834	-1.52588	-2.74658	-11.5967	-16.7847	-30.5176	-36.0107	-57.9834	375.061	204.163	109.558	49.7437	-26.5503	-88.8062	-188.599	-272.827	-386.658	-581.055	-993.958
	96.6	31.7383	20.752	11.9019	4.57764	0.610352	-4.27246	-11.9019	-17.0898	-30.8228	-38.147	-57.9834	373.84	201.721	112.61	48.8281	-28.3813	-89.1113	-189.514	-274.963	-379.028	-580.139	-1028.44
	96.7	31.4331	21.3623	11.9019	5.49316	2.13623	-4.27246	-12.5122	-17.395	-29.2969	-38.4521	-56.1523	372.925	200.195	112.915	46.6919	-28.9917	-89.4165	-186.768	-284.119	-382.996	-589.905	-1044.01
	96.8	32.3486	21.3623	10.376	5.49316	-0.305176	-4.88281	-13.1226	-18.0054	-28.6865	-35.7056	-57.373	370.178	198.669	112.915	47.6074	-27.4658	-89.7217	-186.768	-289.612	-392.761	-599.976	-1031.49
	96.9	32.959	21.6675	11.9019	6.10352	-1.2207	-5.79834	-13.7329	-19.5312	-27.1606	-38.4521	-60.73	368.042	195.618	113.22	48.5229	-27.4658	-88.501	-187.683	-291.138	-398.56	-602.722	-1007.69
	97	30.8228	21.9727	11.9019	4.88281	0.610352	-4.57764	-12.8174	-18.6157	-28.6865	-39.3677	-61.0352	367.126	195.923	112	46.0815	-27.771	-87.8906	-186.157	-279.846	-400.391	-589.6	-1011.35
	97.1	28.3813	21.6675	11.9019	6.40869	0.915527	-3.05176	-12.8174	-19.5312	-29.2969	-40.2832	-60.4248	366.821	195.007	113.22	44.5557	-28.0762	-86.9751	-185.242	-265.198	-401.611	-583.801	-1036.99
	97.2	28.9917	20.1416	10.9863	5.79834	2.74658	-2.74658	-14.3433	-18.9209	-29.2969	-37.8418	-62.2559	367.737	195.007	115.356	45.166	-29.6021	-85.144	-188.293	-258.484	-395.813	-588.074	-1061.71
	97.3	30.5176	17.7002	10.0708	3.66211	3.35693	-2.13623	-16.1743	-16.4795	-30.2124	-38.7573	-61.9507	363.77	199.585	115.967	50.0488	-29.9072	-87.2803	-191.04	-252.686	-391.235	-591.125	-1071.47
	97.4	29.9072	19.2261	11.2915	3.35693	1.52588	-4.27246	-15.8691	-16.7847	-32.6538	-43.0298	-61.3403	362.549	203.247	115.356	47.6074	-30.2124	-85.144	-187.073	-246.887	-386.353	-585.022	-1073
	97.5	30.8228	21.3623	12.207	5.49316	3.35693	-4.88281	-15.2588	-18.6157	-32.6538	-44.2505	-60.73	362.854	205.078	116.272	46.0815	-30.8228	-83.0078	-181.58	-248.108	-388.489	-584.717	-1074.83
	97.6	31.4331	21.6675	11.2915	4.57764	3.05176	-4.27246	-13.4277	-18.6157	-32.0435	-45.166	-59.8145	360.107	210.876	118.408	46.3867	-28.9917	-80.8716	-183.411	-250.549	-394.592	-591.125	-1065.67
	97.7	30.8228	19.8364	10.9863	5.79834	1.52588	-3.05176	-12.207	-17.7002	-31.7383	-45.4712	-60.73	352.478	211.182	119.019	43.6401	-27.4658	-80.8716	-189.819	-252.38	-405.884	-589.6	-1060.18
	97.8	30.2124	19.5312	11.9019	7.32422	2.13623	-2.13623	-11.5967	-16.4795	-31.4331	-47.3022	-61.9507	348.511	209.656	116.272	45.4712	-23.8037	-81.4819	-192.871	-256.042	-411.987	-579.529	-1062.32
	97.9	28.9917	20.4468	10.9863	6.40869	1.83105	-2.13623	-11.5967	-18.0054	-33.8745	-47.9126	-57.9834	349.731	209.045	114.746	45.166	-25.9399	-82.7026	-187.073	-260.925	-417.786	-575.562	-1067.5
	98	29.2969	18.0054	12.207	5.18799	1.83105	-3.05176	-11.5967	-19.2261	-34.1797	-46.9971	-56.7627	343.933	209.961	112.61	43.0298	-28.9917	-84.2285	-181.885	-264.587	-417.786	-583.496	-1076.35
	98.1	30.5176	17.0898	13.1226	3.05176	1.2207	-3.96729	-13.1226	-18.0054	-32.0435	-46.6919	-55.542	341.492	213.013	114.746	46.9971	-31.1279	-84.2285	-180.969	-266.418	-414.124	-598.145	-1084.59
	98.2	29.9072	18.6157	12.207	2.74658	0.610352	-3.96729	-12.5122	-15.2588	-32.3486	-46.9971	-57.9834	344.238	211.792	113.22	49.4385	-28.0762	-83.313	-186.768	-269.165	-412.598	-604.248	-1088.56
	98.3	30.2124	18.0054	11.5967	3.66211	-1.52588	-4.88281	-11.5967	-15.564	-31.4331	-48.8281	-59.2041	343.323	208.74	113.525	46.3867	-31.1279	-84.2285	-189.514	-275.879	-414.734	-600.891	-1087.65
	98.4	32.0435	19.5312	12.207	5.49316	-0.610352	-3.66211	-9.15527	-17.0898	-32.3486	-50.354	-60.73	345.764	208.74	114.441	43.6401	-32.6538	-86.3647	-194.092	-278.625	-420.227	-599.976	-1096.5
	98.5	32.0435	18.9209	10.9863	4.57764	0.305176	-2.74658	-10.0708	-17.395	-35.7056	-48.2178	-61.0352	356.75	214.844	114.441	42.7246	-28.3813	-86.6699	-192.566	-279.541	-420.532	-596.619	-1107.18
	98.6	31.7383	18.6157	10.6812	5.18799	1.2207	-3.35693	-12.5122	-18.9209	-36.3159	-46.9971	-61.9507	360.718	218.506	114.441	44.5557	-29.2969	-89.1113	-186.462	-268.555	-416.565	-594.788	-1097.11
	98.7	30.2124	17.0898	12.207	7.32422	0.610352	-3.96729	-11.9019	-18.0054	-35.0952	-47.3022	-60.4248	356.445	218.811	115.356	44.5557	-28.9917	-89.1113	-189.209	-256.348	-416.565	-595.398	-1084.29
	98.8	30.2124	17.7002	12.5122	7.32422	0.610352	-3.66211	-8.8501	-18.0054	-34.79	-48.2178	-56.7627	344.849	217.896	113.22	44.2505	-28.9917	-88.1958	-193.787	-247.803	-416.26	-599.67	-1085.82
	98.9	32.3486	16.4795	11.2915	5.49316	1.2207	-3.66211	-8.54492	-18.6157	-35.0952	-50.354	-60.4248	335.999	217.896	113.831	45.166	-31.7383	-92.1631	-193.787	-244.446	-407.41	-599.06	-1090.7
	99	33.8745	16.4795	10.9863	4.88281	0.610352	-3.66211	-9.76562	-16.7847	-33.8745	-52.1851	-60.73	330.2	218.201	113.525	43.9453	-31.7383	-96.7407	-195.618	-243.225	-397.949	-597.534	-1097.41
	99.1	31.7383	18.6157	10.0708	5.79834	-1.52588	-3.66211	-9.15527	-17.0898	-31.7383	-52.7954	-59.8145	332.031	213.928	113.22	46.0815	-27.1606	-99.7925	-196.228	-247.803	-391.846	-589.905	-1111.15
	99.2	29.6021	17.395	10.6812	6.10352	-0.305176	-3.96729	-8.8501	-17.395	-29.9072	-50.9644	-56.7627	337.524	212.097	116.272	44.5557	-25.6348	-96.7407	-192.566	-248.718	-392.761	-589.6	-1119.69
	99.3	29.6021	19.2261	12.5122	5.79834	1.83105	-5.18799	-8.23975	-16.4795	-29.6021	-49.7437	-54.3213	346.069	213.013	113.525	44.8608	-26.8555	-90.9424	-193.481	-252.075	-390.32	-600.281	-1113.28
	99.4	29.6021	19.5312	12.5122	5.49316	2.13623	-4.88281	-9.15527	-15.8691	-30.8228	-50.354	-53.7109	350.037	210.266	112	46.0815	-28.0762	-88.501	-194.092	-263.977	-382.08	-603.027	-1085.51
	99.5	28.6865	18.6157	11.5967	7.93457	1.52588	-5.79834	-10.0708	-16.1743	-29.9072	-49.1333	-54.3213	343.018	211.182	110.168	47.3022	-30.2124	-89.7217	-192.871	-267.944	-379.639	-610.046	-1052.86
	99.6	29.6021	18.9209	10.376	6.71387	2.13623	-5.49316	-9.46045	-15.8691	-27.4658	-49.4385	-55.542	349.426	216.675	110.168	47.3022	-31.4331	-87.2803	-199.28	-261.536	-383.911	-617.371	-1035.46
	99.7	29.9072	19.5312	10.376	6.40869	1.83105	-5.18799	-9.46045	-17.7002	-26.2451	-47.9126	-54.3213	364.685	223.083	112.915	45.4712	-32.6538	-86.9751	-206.299	-263.062	-393.982	-626.221	-1043.4
	99.8	27.771	17.395	11.5967	7.01904	0.610352	-5.79834	-10.9863	-17.7002	-28.6865	-44.8608	-56.1523	370.789	224.609	118.103	45.166	-30.8228	-89.4165	-205.078	-264.282	-390.625	-633.24	-1057.74
	99.9	26.5503	15.564	11.5967	7.01904	0.915527	-4.88281	-10.0708	-19.5312	-30.2124	-41.1987	-56.4575	365.906	223.083	121.46	43.6401	-29.6021	-89.4165	-197.144	-258.179	-385.437	-628.357	-1068.12
	100	27.771	18.0054	12.207	6.40869	0	-5.18799	-9.76562	-18.6157	-30.2124	-39.0625	-53.4058	357.666	223.694	119.629	45.166	-27.771	-91.2476	-191.956	-256.653	-385.132	-611.267	-1074.52
	100.1	30.5176	19.2261	10.9863	6.10352	0.610352	-3.96729	-10.9863	-16.1743	-27.1606	-39.978	-51.2695	354.004	222.473	119.019	45.166	-27.1606	-89.1113	-192.566	-254.822	-392.151	-585.632	-1081.24
	100.2	32.0435	17.7002	10.376	6.71387	1.83105	-3.66211	-10.9863	-15.2588	-28.9917	-40.5884	-52.4902	359.192	222.473	118.408	43.6401	-26.2451	-92.4683	-195.618	-255.432	-400.696	-580.139	-1095.89
	100.3	31.1279	15.2588	9.76562	6.40869	1.2207	-3.96729	-9.46045	-16.4795	-27.771	-38.7573	-53.1006	360.413	221.252	119.324	42.7246	-28.6865	-90.6372	-196.228	-257.568	-400.696	-608.826	-1109.92
	100.4	29.9072	15.8691	10.9863	8.54492	-1.2207	-5.79834	-10.9863	-19.2261	-26.5503	-40.5884	-54.6265	353.088	220.337	119.019	44.2505	-32.6538	-87.8906	-199.585	-258.789	-397.949	-635.376	-1108.4
	100.5	29.9072	16.7847	11.9019	7.62939	-0.305176	-3.96729	-11.5967	-18.6157	-26.8555	-40.8936	-53.1006	347.595	219.727	120.544	46.3867	-32.6538	-87.5854	-201.721	-260.925	-389.404	-648.804	-1110.23
	100.6	28.0762	17.0898	10.9863	3.96729	1.83105	-4.57764	-11.2915	-16.7847	-28.3813	-41.5039	-51.8799	347.595	217.896	121.155	48.5229	-32.3486	-85.7544	-199.585	-263.977	-381.47	-653.381	-1120.91
	100.7	29.9072	17.7002	11.5967	4.27246	1.83105	-5.18799	-11.5967	-16.4795	-29.2969	-41.8091	-52.1851	353.394	212.708	121.46	46.3867	-29.2969	-83.0078	-198.975	-261.841	-383.911	-650.635	-1124.57
	100.8	32.3486	19.2261	11.5967	6.10352	0.305176	-4.57764	-12.8174	-14.6484	-30.8228	-39.0625	-53.7109	357.971	209.961	120.544	46.9971	-28.9917	-83.0078	-204.468	-257.263	-392.761	-649.109	-1139.53
	100.9	32.6538	20.4468	11.5967	6.71387	-1.52588	-3.96729	-13.4277	-14.9536	-30.5176	-37.5366	-57.9834	360.718	211.792	118.103	48.2178	-29.2969	-81.7871	-209.656	-254.517	-395.508	-645.752	-1150.82
	101	32.6538	20.4468	11.9019	5.49316	0.305176	-4.57764	-12.8174	-17.0898	-30.8228	-38.4521	-59.2041	360.413	210.266	116.882	45.166	-31.7383	-79.0405	-212.402	-256.042	-393.066	-636.902	-1154.79
	101.1	30.2124	20.4468	12.5122	4.88281	0.915527	-4.27246	-10.0708	-16.4795	-32.6538	-38.7573	-58.2886	366.516	211.182	119.019	45.4712	-34.79	-79.0405	-213.013	-256.958	-388.489	-628.052	-1142.58
	101.2	31.1279	19.5312	10.6812	4.88281	1.2207	-1.83105	-10.376	-18.6157	-34.1797	-38.147	-59.2041	361.633	213.928	118.713	46.6919	-33.2642	-80.8716	-213.623	-259.094	-390.015	-630.798	-1120.61
	101.3	29.9072	19.2261	11.9019	7.01904	0.610352	-2.13623	-10.9863	-19.2261	-31.1279	-38.7573	-60.1196	358.276	210.876	118.408	47.3022	-31.4331	-81.7871	-213.013	-263.977	-387.268	-635.681	-1107.79
	101.4	31.1279	18.9209	12.8174	5.49316	0	-3.96729	-11.2915	-18.9209	-29.9072	-36.9263	-61.3403	363.77	209.045	119.934	46.9971	-30.5176	-83.0078	-207.52	-269.47	-382.996	-640.564	-1110.53
	101.5	32.0435	18.0054	13.1226	4.57764	-0.305176	-4.88281	-10.376	-18.6157	-28.0762	-36.6211	-61.3403	355.835	206.604	116.272	46.6919	-32.6538	-83.9233	-202.332	-277.405	-380.554	-645.142	-1113.89
	101.6	31.1279	19.8364	13.1226	5.49316	0	-5.49316	-9.46045	-16.4795	-28.6865	-36.3159	-62.8662	349.426	204.163	116.272	44.5557	-31.7383	-83.6182	-202.637	-285.339	-375.671	-646.973	-1116.33
	101.7	29.2969	19.5312	11.5967	5.18799	2.44141	-4.27246	-10.376	-17.0898	-28.3813	-36.9263	-60.4248	350.952	202.637	119.934	44.5557	-32.0435	-85.4492	-203.857	-284.729	-375.977	-647.583	-1122.13
	101.8	29.2969	18.6157	11.9019	4.88281	0	-3.66211	-11.2915	-17.7002	-27.1606	-39.3677	-57.0679	356.14	199.89	122.681	45.7764	-30.2124	-87.8906	-203.247	-271.301	-380.249	-646.362	-1131.59
	101.9	32.0435	19.2261	11.2915	4.27246	0	-2.44141	-13.1226	-20.1416	-27.4658	-39.978	-55.542	361.938	194.397	124.512	45.166	-31.1279	-85.7544	-203.552	-262.756	-381.165	-645.142	-1128.85
	102	30.2124	19.2261	10.9863	4.27246	2.13623	-4.88281	-11.5967	-18.9209	-28.6865	-38.4521	-55.542	356.14	191.345	124.207	46.3867	-30.8228	-86.3647	-203.247	-260.01	-378.723	-632.935	-1119.38
	102.1	27.1606	20.4468	10.9863	3.35693	2.74658	-3.35693	-11.2915	-18.6157	-27.4658	-36.9263	-56.4575	344.849	189.819	121.46	44.8608	-31.4331	-86.0596	-204.163	-259.705	-378.113	-623.474	-1104.43
	102.2	29.2969	19.2261	10.9863	6.10352	1.52588	-3.66211	-10.376	-17.395	-26.8555	-38.147	-57.373	343.933	188.599	119.629	44.8608	-30.2124	-86.3647	-206.299	-259.094	-378.113	-630.798	-1081.24
	102.3	30.2124	19.2261	12.5122	6.10352	1.2207	-1.83105	-10.0708	-15.564	-26.2451	-37.5366	-58.5938	354.309	193.176	120.544	44.8608	-30.5176	-90.0269	-216.675	-260.315	-381.165	-647.888	-1061.1
	102.4	28.0762	17.395	12.8174	5.18799	0.610352	-2.13623	-8.23975	-18.0054	-28.0762	-36.9263	-62.2559	361.938	193.787	121.46	44.8608	-28.6865	-86.0596	-217.59	-263.367	-381.165	-657.959	-1059.57
	102.5	26.8555	15.564	11.9019	7.32422	1.83105	-1.83105	-9.15527	-20.4468	-28.9917	-36.6211	-64.0869	365.295	194.702	119.934	43.335	-30.8228	-82.7026	-214.233	-268.25	-382.996	-660.095	-1066.28
	102.6	25.9399	18.9209	11.5967	8.23975	0.915527	-1.83105	-11.2915	-19.8364	-30.2124	-35.4004	-63.7817	362.549	197.449	120.544	43.9453	-32.0435	-81.7871	-212.097	-267.944	-388.489	-647.888	-1071.47
	102.7	28.9917	19.5312	12.5122	7.32422	1.2207	-1.83105	-12.207	-18.9209	-28.6865	-34.79	-63.7817	358.887	197.754	121.765	44.5557	-31.4331	-85.144	-205.078	-259.094	-398.865	-623.474	-1080.63
	102.8	31.7383	20.1416	12.8174	4.57764	0.610352	-2.74658	-12.207	-17.395	-28.6865	-36.3159	-65.6128	361.633	194.092	121.155	45.166	-35.4004	-87.5854	-203.552	-258.789	-406.189	-614.014	-1085.82
	102.9	31.1279	19.8364	13.1226	4.88281	1.2207	-2.74658	-10.6812	-18.6157	-28.6865	-37.2314	-64.0869	363.159	194.702	118.408	44.5557	-32.0435	-85.7544	-203.247	-259.094	-409.546	-620.422	-1103.52
	103	28.6865	18.0054	12.5122	6.40869	1.2207	-4.57764	-10.0708	-20.4468	-27.771	-38.4521	-61.3403	362.244	198.364	117.188	43.335	-29.9072	-85.144	-202.332	-252.686	-407.715	-625.916	-1099.24
	103.1	26.5503	17.395	12.5122	9.15527	1.2207	-3.35693	-10.9863	-21.6675	-26.2451	-39.6729	-58.8989	366.516	198.975	119.019	43.0298	-30.8228	-88.8062	-200.806	-248.413	-404.358	-619.812	-1076.97
	103.2	28.9917	16.4795	14.0381	7.62939	2.74658	-0.610352	-11.5967	-21.0571	-28.3813	-37.8418	-60.4248	368.042	196.533	121.46	45.4712	-28.3813	-90.6372	-195.618	-252.38	-405.579	-617.371	-1056.21
	103.3	28.6865	19.5312	12.207	4.57764	3.35693	-2.13623	-12.8174	-20.752	-29.6021	-36.0107	-60.4248	370.483	193.787	120.85	46.6919	-28.0762	-90.9424	-194.397	-260.315	-405.579	-609.741	-1047.06
	103.4	29.9072	17.395	12.5122	6.10352	2.13623	-2.74658	-12.8174	-18.9209	-30.8228	-34.1797	-57.9834	376.587	192.871	118.713	44.2505	-30.2124	-87.8906	-193.787	-272.217	-402.527	-596.924	-1049.5
	103.5	28.0762	17.395	12.8174	5.79834	0.610352	-2.44141	-13.4277	-17.7002	-30.2124	-34.79	-57.0679	378.723	195.312	118.713	42.4194	-31.4331	-87.2803	-195.007	-275.269	-405.273	-590.515	-1076.97
	103.6	29.2969	19.5312	10.9863	7.32422	-0.305176	-4.27246	-13.4277	-18.0054	-28.9917	-34.1797	-57.6782	375.366	202.942	117.798	42.1143	-28.9917	-91.5527	-196.838	-272.522	-407.715	-597.534	-1102.29
	103.7	30.5176	19.8364	10.0708	7.93457	1.83105	-1.2207	-10.9863	-17.7002	-28.6865	-34.79	-57.6782	372.925	205.688	115.967	42.7246	-28.0762	-92.7734	-201.111	-267.944	-407.104	-605.774	-1103.82
	103.8	29.2969	18.6157	10.0708	7.01904	0.610352	-1.2207	-10.376	-19.5312	-30.2124	-33.8745	-58.5938	374.451	212.708	112.305	41.1987	-28.6865	-87.5854	-204.163	-264.893	-409.241	-609.131	-1081.85
	103.9	28.3813	18.0054	11.5967	7.01904	1.83105	-3.66211	-9.46045	-19.2261	-31.1279	-31.4331	-62.2559	385.132	217.285	115.967	42.1143	-29.2969	-85.7544	-209.351	-261.536	-421.753	-616.76	-1054.99
	104	28.6865	18.6157	10.6812	7.93457	0.610352	-4.57764	-11.5967	-18.6157	-30.2124	-31.1279	-60.73	393.372	216.98	119.019	43.0298	-28.6865	-86.9751	-214.539	-259.705	-438.232	-624.084	-1030.27
	104.1	29.6021	17.7002	10.9863	5.18799	-0.305176	-6.10352	-12.8174	-17.0898	-32.3486	-30.2124	-58.8989	394.287	216.37	115.051	44.8608	-28.9917	-86.6699	-211.487	-262.756	-440.063	-628.357	-1027.22
	104.2	29.9072	18.0054	10.6812	3.66211	0.610352	-7.93457	-11.5967	-17.0898	-32.959	-29.9072	-59.5093	389.404	212.708	113.22	44.5557	-29.2969	-86.9751	-206.299	-263.977	-430.298	-628.662	-1025.7
	104.3	32.0435	17.395	12.207	4.27246	0.610352	-3.05176	-10.0708	-16.7847	-31.7383	-30.8228	-59.2041	376.892	212.402	115.356	45.166	-30.5176	-89.1113	-205.078	-263.672	-422.058	-621.948	-1016.85
	104.4	30.5176	16.7847	12.5122	4.57764	0.610352	-6.40869	-10.0708	-16.1743	-31.7383	-29.9072	-58.8989	368.042	217.59	114.136	44.2505	-31.1279	-90.332	-205.078	-258.789	-420.532	-605.469	-1014.4
	104.5	29.2969	16.4795	13.1226	5.49316	2.13623	-5.18799	-12.207	-16.4795	-32.0435	-30.8228	-60.73	362.244	220.032	112.305	42.4194	-28.3813	-87.5854	-202.637	-250.854	-410.767	-585.327	-1006.77
	104.6	29.6021	18.6157	12.8174	4.88281	1.52588	-1.83105	-12.207	-15.564	-31.4331	-33.8745	-58.8989	363.77	220.032	113.22	43.0298	-27.4658	-88.8062	-201.416	-245.056	-397.644	-568.542	-1004.64
	104.7	29.6021	17.7002	12.8174	3.35693	2.13623	-2.74658	-11.2915	-15.2588	-31.1279	-30.8228	-58.8989	371.094	219.116	111.694	42.7246	-29.2969	-92.4683	-198.364	-245.361	-390.625	-570.984	-1011.66
	104.8	29.2969	20.4468	15.2588	3.35693	0.610352	-5.18799	-14.3433	-15.8691	-29.6021	-28.0762	-60.4248	362.854	216.675	112.61	45.166	-28.6865	-91.5527	-194.702	-248.718	-390.625	-582.275	-1019.9
	104.9	28.6865	19.2261	13.4277	4.27246	-0.610352	-4.27246	-13.1226	-16.7847	-27.4658	-31.1279	-60.1196	350.037	214.539	113.525	42.7246	-26.8555	-90.6372	-195.618	-251.77	-401.001	-588.989	-1022.95
	105	29.6021	19.5312	12.8174	4.88281	0.915527	-3.05176	-8.8501	-14.0381	-28.9917	-32.959	-61.6455	344.849	217.285	112.61	39.978	-23.1934	-86.9751	-196.533	-249.939	-418.701	-590.21	-1025.09
	105.1	27.1606	19.2261	11.2915	6.71387	0.610352	-2.74658	-7.62939	-15.2588	-29.2969	-33.2642	-63.1714	353.394	220.337	113.831	39.978	-22.8882	-88.1958	-198.364	-243.835	-428.467	-596.008	-1032.71
	105.2	25.0244	16.7847	11.9019	6.10352	3.05176	-3.66211	-7.62939	-13.7329	-31.4331	-33.2642	-61.9507	353.394	219.421	116.272	42.1143	-25.3296	-90.9424	-199.89	-246.887	-431.213	-606.689	-1041.26
	105.3	28.0762	17.7002	11.9019	5.79834	0.915527	-2.44141	-8.23975	-12.5122	-30.5176	-31.7383	-58.8989	350.952	214.233	115.967	42.7246	-24.7192	-92.7734	-204.773	-253.296	-430.298	-611.267	-1058.96
	105.4	30.5176	18.9209	12.5122	7.32422	0.610352	-1.52588	-10.376	-12.8174	-28.6865	-34.1797	-58.2886	354.614	209.961	115.356	44.5557	-26.2451	-92.7734	-209.351	-254.517	-425.11	-610.657	-1070.56
	105.5	32.0435	18.6157	13.7329	7.01904	0.610352	-3.66211	-9.76562	-14.3433	-28.9917	-36.9263	-58.2886	355.53	208.13	115.662	42.7246	-27.1606	-93.3838	-212.402	-252.075	-420.227	-606.995	-1066.59
	105.6	29.9072	17.7002	12.8174	6.40869	0.915527	-2.74658	-7.62939	-14.0381	-30.8228	-36.9263	-58.2886	353.088	206.299	117.798	38.147	-26.2451	-91.5527	-213.928	-250.549	-420.532	-599.976	-1063.23
	105.7	26.5503	17.395	13.7329	7.62939	2.74658	-4.88281	-7.62939	-14.0381	-29.2969	-36.3159	-57.9834	356.75	204.468	117.798	40.8936	-25.3296	-88.501	-214.844	-251.465	-430.908	-589.905	-1066.28
	105.8	30.2124	17.7002	14.0381	6.10352	2.74658	-2.74658	-9.15527	-15.2588	-28.6865	-38.147	-57.373	362.244	204.773	118.103	44.2505	-24.4141	-89.7217	-217.59	-255.432	-436.096	-584.717	-1062.93
	105.9	29.6021	17.0898	11.5967	3.35693	2.44141	-1.52588	-9.76562	-15.564	-29.9072	-38.7573	-57.9834	368.652	211.182	115.662	43.0298	-24.7192	-90.0269	-215.759	-260.62	-431.213	-582.886	-1052.55
	106	27.771	17.395	12.8174	4.27246	2.74658	-2.13623	-10.0708	-14.3433	-31.7383	-37.5366	-56.4575	373.23	211.487	116.272	45.166	-25.9399	-91.5527	-209.961	-260.315	-429.993	-580.139	-1038.51
	106.1	26.8555	16.1743	13.7329	6.71387	1.83105	-3.96729	-10.9863	-13.4277	-32.6538	-37.2314	-56.1523	368.652	211.182	117.798	45.4712	-27.771	-87.8906	-213.928	-265.503	-424.5	-577.393	-1027.83
	106.2	26.5503	17.0898	13.1226	8.23975	-0.305176	-0.915527	-10.9863	-14.3433	-31.7383	-36.6211	-54.6265	365.295	215.454	114.136	44.8608	-25.3296	-88.8062	-219.421	-269.47	-422.974	-575.256	-1023.56
	106.3	28.3813	18.0054	11.5967	6.71387	1.52588	-2.74658	-10.6812	-15.2588	-31.1279	-37.5366	-56.4575	361.328	214.844	115.051	46.0815	-21.6675	-86.0596	-214.844	-267.639	-422.974	-571.289	-1014.1
	106.4	28.0762	18.6157	10.376	4.88281	1.83105	-3.35693	-9.15527	-14.6484	-31.7383	-37.5366	-55.8472	352.783	211.182	117.493	45.166	-22.2778	-84.2285	-215.759	-262.451	-415.955	-565.186	-998.535
	106.5	28.9917	17.0898	10.6812	4.88281	1.52588	-4.27246	-8.54492	-17.0898	-32.0435	-34.4849	-55.542	346.375	210.266	118.103	42.7246	-24.1089	-85.144	-210.876	-260.925	-410.156	-564.88	-989.685
	106.6	29.9072	19.8364	12.8174	7.01904	2.44141	-3.66211	-8.54492	-16.7847	-32.3486	-33.5693	-56.4575	349.121	209.961	118.103	44.5557	-26.2451	-86.3647	-204.468	-258.179	-407.715	-566.406	-982.971
	106.7	28.9917	18.0054	14.3433	6.10352	2.44141	-1.2207	-9.15527	-17.7002	-32.6538	-35.4004	-56.7627	352.783	204.163	121.765	42.7246	-26.2451	-86.3647	-200.806	-260.01	-411.377	-558.167	-987.244
	106.8	29.9072	17.395	14.9536	6.10352	1.2207	-0.915527	-11.5967	-16.7847	-32.3486	-35.4004	-60.4248	365.295	195.312	122.07	42.7246	-24.7192	-86.3647	-196.533	-260.925	-411.377	-546.57	-1001.59
	106.9	28.6865	16.4795	14.3433	6.40869	2.13623	-3.05176	-9.46045	-17.0898	-32.6538	-36.3159	-60.73	382.996	195.312	121.155	42.7246	-26.2451	-90.0269	-195.007	-257.263	-406.799	-539.856	-1009.22
	107	28.3813	19.2261	13.1226	5.18799	1.83105	-2.13623	-8.23975	-15.2588	-33.8745	-36.6211	-59.8145	392.761	199.28	118.408	44.8608	-27.771	-90.0269	-198.059	-257.874	-405.273	-545.654	-1018.07
	107.1	29.6021	20.1416	12.207	4.88281	0.915527	-2.74658	-9.15527	-14.6484	-32.0435	-36.9263	-61.0352	398.56	201.721	115.662	43.6401	-27.1606	-87.8906	-201.721	-254.822	-410.461	-551.758	-1024.78
	107.2	30.5176	18.9209	12.207	6.10352	1.83105	-3.96729	-12.5122	-14.6484	-31.1279	-36.0107	-62.2559	391.541	199.28	118.103	44.2505	-26.8555	-84.8389	-202.637	-253.906	-416.26	-567.932	-1010.44
	107.3	29.2969	17.7002	10.6812	7.93457	1.83105	-0.610352	-10.0708	-16.1743	-32.3486	-37.5366	-61.3403	379.028	198.669	115.356	45.7764	-29.9072	-85.7544	-206.299	-259.705	-411.682	-598.45	-986.328
	107.4	26.8555	17.395	10.376	6.10352	0.915527	-0.610352	-7.62939	-16.1743	-31.1279	-36.9263	-60.4248	377.808	199.585	113.525	46.0815	-31.7383	-88.1958	-210.571	-263.062	-404.663	-614.624	-969.849
	107.5	28.9917	19.5312	10.9863	7.01904	2.13623	-4.27246	-8.23975	-15.8691	-30.2124	-35.0952	-57.0679	383.911	199.585	112.61	45.4712	-29.6021	-85.7544	-214.233	-264.587	-401.306	-614.624	-970.154
	107.6	31.1279	20.1416	10.9863	7.32422	1.2207	-0.610352	-9.46045	-15.2588	-30.8228	-33.8745	-58.5938	390.625	200.5	114.136	43.9453	-25.9399	-84.2285	-215.149	-269.47	-406.799	-614.624	-980.225
	107.7	30.5176	19.2261	10.6812	6.40869	-0.305176	-2.44141	-9.15527	-16.7847	-30.8228	-32.959	-58.2886	388.489	200.806	115.967	41.5039	-26.5503	-85.4492	-213.928	-270.996	-412.292	-615.845	-996.704
	107.8	29.9072	17.0898	9.15527	7.01904	-1.2207	-4.88281	-7.93457	-16.4795	-28.9917	-32.6538	-57.0679	383.606	199.585	118.408	41.8091	-28.6865	-84.8389	-223.083	-272.217	-419.922	-615.845	-1008.61
	107.9	30.8228	16.7847	10.9863	7.62939	-0.610352	-4.27246	-7.93457	-17.7002	-30.8228	-29.9072	-55.542	382.69	198.059	120.544	41.1987	-27.771	-86.9751	-222.778	-274.048	-432.129	-612.183	-1001.28
	108	30.5176	19.2261	10.6812	7.32422	0.305176	-4.27246	-9.15527	-17.7002	-32.0435	-28.9917	-54.3213	392.151	199.89	119.934	43.6401	-25.9399	-88.8062	-213.318	-279.541	-435.181	-606.384	-991.516
	108.1	30.2124	19.2261	11.9019	5.79834	2.13623	-4.88281	-8.8501	-16.4795	-30.2124	-29.9072	-57.9834	404.053	207.214	119.324	45.4712	-27.1606	-86.6699	-210.876	-280.457	-434.875	-614.929	-984.802
	108.2	31.4331	17.7002	10.9863	3.66211	2.13623	-7.01904	-10.376	-17.0898	-29.2969	-30.8228	-59.8145	405.884	209.961	118.103	45.4712	-28.9917	-86.0596	-211.792	-276.184	-434.875	-624.084	-982.361
	108.3	31.4331	19.2261	11.5967	4.57764	0.305176	-4.27246	-12.207	-16.7847	-28.6865	-31.4331	-62.8662	401.611	205.688	118.103	44.8608	-28.6865	-87.2803	-212.097	-273.438	-433.35	-618.591	-974.121
	108.4	28.9917	19.2261	13.4277	5.18799	1.2207	-3.05176	-12.8174	-17.0898	-28.9917	-32.0435	-64.0869	390.32	207.214	115.356	44.5557	-28.3813	-88.1958	-209.045	-268.25	-428.162	-610.046	-957.031
	108.5	26.8555	16.4795	13.7329	4.88281	1.2207	-0.610352	-11.9019	-19.2261	-29.9072	-30.5176	-62.8662	376.892	207.52	114.136	43.9453	-29.6021	-89.1113	-205.994	-260.62	-426.025	-598.45	-942.078
	108.6	29.6021	17.395	12.5122	4.57764	3.35693	-2.44141	-11.5967	-19.5312	-30.8228	-32.959	-61.6455	372.009	205.078	117.493	44.8608	-28.9917	-90.332	-203.247	-251.16	-424.5	-592.651	-944.824
	108.7	29.9072	19.5312	13.4277	4.88281	2.44141	-2.74658	-11.9019	-16.1743	-34.4849	-34.1797	-59.8145	372.925	206.604	116.272	45.4712	-30.8228	-90.6372	-204.773	-244.141	-426.331	-592.651	-953.674
	108.8	30.5176	17.395	15.2588	4.88281	-0.305176	-3.05176	-13.1226	-15.8691	-33.8745	-33.2642	-57.6782	367.737	207.52	113.22	45.4712	-31.1279	-90.332	-210.266	-242.615	-426.636	-587.463	-953.064
	108.9	29.9072	16.4795	14.0381	6.71387	0.915527	-2.74658	-11.2915	-15.564	-32.6538	-35.0952	-58.5938	365.295	210.876	113.22	42.4194	-32.0435	-88.1958	-206.909	-247.498	-435.181	-590.515	-945.435
	109	31.7383	19.5312	11.5967	7.32422	1.83105	-1.2207	-10.9863	-17.395	-31.4331	-36.0107	-58.8989	367.126	215.759	118.103	40.2832	-31.4331	-86.0596	-203.552	-247.803	-448.914	-610.352	-930.481
	109.1	29.6021	19.2261	10.0708	6.40869	1.2207	-1.83105	-10.0708	-18.6157	-28.0762	-35.4004	-58.2886	362.854	214.844	116.272	42.4194	-32.0435	-84.5337	-202.332	-249.329	-458.984	-627.747	-926.208
	109.2	25.9399	16.7847	14.3433	5.49316	0.915527	-3.66211	-8.8501	-19.8364	-28.3813	-34.1797	-58.2886	368.652	207.825	110.474	43.0298	-29.9072	-87.2803	-204.163	-248.108	-454.407	-624.695	-940.247
	109.3	29.6021	16.4795	14.9536	6.71387	1.2207	-1.83105	-10.0708	-19.8364	-30.2124	-36.0107	-55.8472	377.808	203.857	113.525	42.4194	-28.3813	-93.689	-204.163	-249.023	-451.05	-617.676	-960.388
	109.4	32.0435	14.9536	12.8174	5.79834	0	-2.13623	-10.9863	-18.0054	-30.5176	-39.0625	-53.1006	375.671	209.351	116.272	43.335	-25.0244	-94.6045	-205.078	-249.634	-450.134	-623.169	-966.187
	109.5	30.8228	15.564	11.2915	6.10352	-0.305176	-4.27246	-10.6812	-18.0054	-29.9072	-38.4521	-53.4058	368.958	209.961	116.882	44.5557	-25.3296	-96.7407	-210.266	-248.108	-442.505	-628.662	-953.369
	109.6	31.1279	14.9536	16.1743	5.49316	-0.305176	-3.05176	-9.76562	-15.2588	-29.2969	-37.2314	-53.7109	371.094	209.045	119.019	45.4712	-25.0244	-95.52	-210.266	-247.192	-434.57	-624.695	-945.74
	109.7	29.6021	17.7002	15.2588	6.71387	0	-2.44141	-9.46045	-16.4795	-28.6865	-36.6211	-56.7627	381.47	208.13	116.882	43.9453	-24.1089	-98.2666	-212.097	-247.498	-432.739	-613.098	-957.947
	109.8	27.1606	16.1743	12.207	5.49316	1.83105	-2.13623	-8.54492	-17.395	-28.0762	-35.4004	-61.0352	393.982	205.383	119.629	43.335	-24.4141	-98.877	-214.844	-250.244	-428.772	-605.164	-976.562
	109.9	26.8555	14.6484	10.0708	5.18799	3.66211	-0.915527	-8.54492	-18.6157	-27.4658	-38.147	-62.561	399.78	206.299	120.239	44.2505	-23.8037	-97.6562	-211.182	-249.939	-427.246	-607.91	-990.601
	110	27.771	14.6484	9.76562	4.88281	3.05176	0	-9.76562	-17.7002	-26.8555	-36.6211	-65.0024	397.339	208.13	115.967	43.6401	-24.4141	-96.4355	-209.351	-246.582	-426.941	-615.234	-997.62
	110.1	29.6021	17.7002	10.6812	6.40869	2.13623	-2.74658	-9.15527	-17.0898	-27.4658	-33.8745	-68.6646	403.442	204.773	113.525	43.6401	-24.7192	-97.9614	-207.52	-246.277	-428.467	-619.202	-1008.91
	110.2	29.6021	19.5312	11.2915	5.49316	1.83105	-3.66211	-9.46045	-17.395	-28.0762	-31.4331	-66.5283	404.663	204.163	111.389	42.4194	-27.1606	-98.5718	-210.876	-248.413	-429.688	-615.845	-1007.69
	110.3	26.8555	18.0054	13.4277	5.18799	1.2207	-2.13623	-9.15527	-16.7847	-26.5503	-32.6538	-66.2231	394.592	203.857	111.694	42.7246	-28.3813	-99.1821	-214.844	-253.601	-429.993	-614.624	-991.516
	110.4	28.0762	17.0898	14.3433	5.49316	0	-2.44141	-7.93457	-18.6157	-26.5503	-36.0107	-64.3921	385.437	202.637	115.051	44.5557	-28.6865	-97.6562	-216.675	-258.484	-427.856	-620.728	-983.276
	110.5	29.2969	16.7847	14.9536	4.57764	0.915527	-2.13623	-9.46045	-17.7002	-26.8555	-36.3159	-63.4766	379.028	200.195	120.85	42.7246	-29.6021	-98.2666	-211.487	-263.367	-417.786	-635.376	-998.84
	110.6	26.8555	17.395	11.5967	5.79834	0.915527	-2.44141	-9.76562	-19.2261	-27.771	-37.5366	-63.7817	376.587	198.975	121.46	41.8091	-25.6348	-102.539	-201.111	-267.334	-412.598	-650.33	-1035.46
	110.7	26.8555	19.2261	10.6812	6.10352	2.44141	-2.44141	-10.9863	-20.1416	-28.9917	-38.4521	-65.0024	375.061	197.754	120.544	42.7246	-25.0244	-104.675	-192.566	-268.555	-411.987	-650.94	-1064.45
	110.8	28.6865	17.0898	13.7329	4.57764	2.74658	-4.27246	-9.46045	-19.5312	-28.0762	-37.8418	-64.0869	371.704	198.059	118.408	45.166	-25.9399	-106.201	-189.514	-262.146	-408.936	-647.278	-1082.15
	110.9	30.8228	17.0898	14.0381	3.05176	1.52588	-3.96729	-9.76562	-17.0898	-25.6348	-36.6211	-64.6973	377.808	207.214	118.713	43.6401	-25.9399	-107.117	-190.43	-259.399	-404.968	-643.921	-1095.89
	111	28.0762	18.9209	14.9536	7.01904	0.915527	-3.05176	-10.0708	-16.7847	-27.4658	-38.7573	-65.3076	386.353	206.604	120.544	42.1143	-26.2451	-104.37	-193.176	-255.737	-406.799	-641.479	-1113.89
	111.1	24.7192	16.7847	12.5122	6.10352	0.610352	-2.74658	-8.8501	-18.9209	-27.771	-40.2832	-66.8335	399.475	204.163	121.765	43.6401	-24.7192	-101.318	-201.111	-254.211	-408.936	-635.681	-1132.81
	111.2	26.5503	15.8691	10.9863	7.93457	1.2207	-3.96729	-8.8501	-18.9209	-27.771	-37.2314	-68.6646	409.241	205.078	120.544	43.9453	-23.8037	-100.708	-205.078	-253.296	-405.273	-632.324	-1122.74
	111.3	30.5176	16.4795	8.54492	6.10352	1.83105	-0.610352	-10.0708	-18.9209	-27.4658	-37.8418	-69.8853	404.053	206.299	120.85	46.3867	-25.0244	-102.844	-206.604	-250.854	-402.527	-625	-1104.43
	111.4	29.6021	16.4795	9.15527	3.96729	1.83105	-0.610352	-10.9863	-16.4795	-26.5503	-40.5884	-69.5801	400.085	202.942	118.103	45.4712	-26.5503	-101.624	-205.383	-249.329	-408.02	-611.267	-1092.22
	111.5	28.9917	19.8364	9.46045	5.18799	-1.83105	-3.96729	-10.9863	-14.9536	-25.9399	-40.2832	-68.9697	397.949	201.111	115.662	45.166	-24.7192	-96.7407	-199.89	-252.38	-412.598	-598.755	-1075.44
	111.6	32.0435	20.752	12.8174	6.40869	-1.52588	-6.71387	-10.376	-17.395	-24.4141	-40.5884	-71.7163	393.677	201.721	117.188	42.1143	-22.2778	-91.5527	-198.669	-256.042	-411.987	-589.6	-1080.93
	111.7	31.7383	19.8364	10.9863	6.71387	-0.610352	-5.49316	-10.0708	-19.2261	-23.8037	-43.0298	-75.3784	382.08	204.468	113.831	44.2505	-20.4468	-90.0269	-202.332	-253.906	-406.494	-586.243	-1098.63
	111.8	29.6021	19.2261	7.62939	4.57764	-0.305176	-3.96729	-8.8501	-19.2261	-22.583	-43.6401	-77.8198	375.977	208.13	110.779	44.5557	-21.3623	-92.1631	-204.773	-257.874	-401.611	-596.924	-1093.75
	111.9	28.6865	16.4795	10.0708	4.57764	0.610352	-5.79834	-7.93457	-21.0571	-25.9399	-44.2505	-75.6836	377.197	212.097	111.389	44.8608	-25.3296	-90.6372	-205.078	-268.555	-398.865	-606.995	-1059.57
	112	29.2969	15.564	13.4277	3.05176	1.52588	-4.88281	-9.76562	-21.9727	-27.1606	-42.4194	-72.937	386.047	212.402	115.051	44.5557	-24.7192	-88.8062	-206.909	-274.658	-403.137	-614.624	-1043.7
	112.1	31.7383	18.9209	13.4277	3.35693	0	-3.96729	-12.207	-20.4468	-26.2451	-43.0298	-71.106	392.456	212.402	118.713	43.335	-22.583	-85.4492	-209.961	-273.132	-413.513	-614.014	-1052.86
	112.2	32.3486	18.0054	12.5122	4.27246	0.305176	-3.96729	-14.6484	-18.0054	-26.2451	-43.6401	-70.8008	397.034	210.571	116.882	46.0815	-21.9727	-85.7544	-209.961	-273.132	-422.668	-611.267	-1054.08
	112.3	31.7383	17.0898	13.1226	3.96729	-0.915527	-5.49316	-13.7329	-17.7002	-25.9399	-44.5557	-70.4956	402.222	206.604	115.356	45.7764	-24.7192	-87.5854	-210.876	-278.32	-429.077	-610.962	-1050.72
	112.4	31.1279	19.8364	11.9019	5.79834	-0.915527	-4.27246	-13.7329	-19.5312	-26.5503	-46.6919	-71.4111	401.917	207.52	118.713	44.2505	-22.8882	-86.6699	-209.045	-280.457	-428.162	-613.098	-1051.94
	112.5	28.9917	18.9209	10.6812	7.01904	1.83105	-2.44141	-13.4277	-20.752	-27.4658	-46.0815	-70.4956	395.203	205.078	125.122	46.6919	-21.0571	-87.2803	-206.299	-281.982	-421.448	-626.526	-1030.88
	112.6	27.1606	16.4795	11.5967	5.79834	3.05176	-1.83105	-12.207	-18.6157	-26.8555	-44.8608	-68.3594	388.794	207.52	122.986	46.9971	-23.8037	-90.332	-202.332	-280.457	-415.649	-645.142	-1018.37
	112.7	30.5176	17.7002	14.3433	5.49316	0.610352	-3.05176	-13.4277	-17.395	-26.2451	-44.5557	-68.3594	379.944	210.571	121.765	48.8281	-26.2451	-94.2993	-198.669	-275.879	-412.292	-647.583	-1048.58
	112.8	31.7383	20.4468	15.564	5.49316	1.83105	-3.66211	-11.2915	-19.2261	-26.8555	-47.3022	-64.6973	375.977	216.064	119.019	49.1333	-25.6348	-98.2666	-203.857	-276.184	-414.124	-637.207	-1090.7
	112.9	31.4331	19.8364	10.376	5.49316	0.305176	-2.74658	-9.76562	-19.8364	-27.771	-49.7437	-65.918	365.906	217.896	116.882	48.2178	-25.3296	-101.318	-204.773	-275.879	-413.818	-626.526	-1099.85
	113	30.5176	16.4795	9.46045	6.71387	0	-4.88281	-9.76562	-19.5312	-28.3813	-46.9971	-70.4956	357.971	218.811	115.662	44.5557	-25.9399	-99.7925	-202.637	-272.522	-413.818	-633.545	-1108.09
	113.1	29.6021	14.0381	11.5967	7.62939	1.83105	-4.57764	-9.46045	-19.5312	-26.8555	-48.8281	-72.3267	354.614	218.811	117.493	44.2505	-26.5503	-98.5718	-201.416	-271.606	-424.194	-636.902	-1116.64
	113.2	29.6021	15.8691	11.2915	7.01904	0.915527	-3.66211	-10.376	-20.752	-28.6865	-49.7437	-70.1904	353.394	217.285	119.324	46.3867	-26.8555	-100.098	-201.416	-279.846	-427.551	-637.817	-1106.26
	113.3	32.0435	18.6157	11.2915	5.79834	-0.915527	-2.74658	-10.376	-20.752	-28.6865	-49.1333	-69.2749	351.562	219.116	118.713	47.3022	-25.0244	-98.877	-199.28	-282.898	-419.312	-645.447	-1083.37
	113.4	30.8228	17.7002	12.5122	4.57764	0	-1.52588	-10.0708	-19.5312	-28.0762	-50.0488	-69.5801	351.562	222.168	118.103	46.3867	-25.3296	-101.318	-198.975	-285.339	-404.358	-640.259	-1050.11
	113.5	33.2642	15.8691	11.2915	2.74658	-1.52588	-3.66211	-10.376	-19.2261	-26.2451	-48.8281	-66.5283	354.614	220.337	119.019	46.6919	-25.3296	-101.013	-199.89	-281.067	-402.222	-628.357	-1027.22
	113.6	32.959	16.7847	13.1226	4.57764	-0.610352	-4.27246	-9.46045	-18.9209	-24.7192	-51.2695	-64.6973	366.516	219.727	115.662	47.9126	-26.2451	-100.098	-202.332	-278.015	-404.968	-613.098	-1027.83
	113.7	29.2969	17.7002	12.5122	5.49316	0.305176	-3.66211	-10.6812	-20.752	-26.5503	-51.5747	-64.3921	373.84	222.168	115.051	44.8608	-24.7192	-104.065	-204.773	-273.743	-400.696	-613.403	-1049.8
	113.8	29.2969	16.1743	12.207	4.57764	1.2207	-2.74658	-10.9863	-21.0571	-29.9072	-48.5229	-65.3076	369.263	220.947	115.356	40.8936	-24.7192	-105.591	-205.688	-273.743	-396.729	-629.883	-1071.17
	113.9	29.2969	17.395	13.1226	5.49316	2.44141	-3.05176	-10.0708	-21.6675	-27.4658	-44.8608	-65.918	361.633	219.727	115.662	45.4712	-25.3296	-106.506	-203.857	-281.677	-393.372	-644.531	-1078.49
	114	29.9072	19.5312	10.0708	4.27246	1.83105	-3.66211	-9.76562	-17.7002	-27.1606	-45.7764	-65.3076	355.835	217.59	119.324	50.0488	-26.2451	-106.812	-204.773	-284.119	-392.761	-637.817	-1069.03
	114.1	30.5176	20.1416	7.62939	3.96729	-1.2207	-5.49316	-7.62939	-18.9209	-27.4658	-46.6919	-65.3076	349.731	215.454	118.408	47.6074	-24.7192	-108.337	-211.487	-287.476	-395.813	-629.578	-1073
	114.2	30.5176	16.1743	12.207	4.88281	-0.305176	-4.88281	-9.76562	-20.4468	-29.6021	-46.3867	-66.5283	345.764	216.37	116.577	43.6401	-24.7192	-108.032	-216.37	-285.034	-399.475	-633.24	-1081.54
	114.3	30.5176	17.7002	11.5967	6.10352	1.83105	-6.71387	-8.54492	-21.9727	-29.9072	-46.3867	-68.6646	343.933	218.201	116.577	43.335	-28.3813	-107.727	-214.844	-283.813	-399.475	-641.785	-1077.88
	114.4	30.5176	17.7002	10.9863	5.49316	0.915527	-2.74658	-7.93457	-22.583	-28.3813	-44.2505	-67.749	342.102	221.558	116.882	45.7764	-25.3296	-106.201	-209.045	-285.645	-401.611	-650.94	-1069.34
	114.5	29.6021	16.4795	11.5967	5.49316	-0.610352	-1.52588	-9.76562	-21.3623	-25.9399	-42.4194	-66.5283	340.881	217.285	120.239	46.0815	-21.0571	-104.98	-207.52	-286.865	-403.137	-647.278	-1045.23
	114.6	28.0762	18.0054	12.5122	5.49316	0.915527	-2.74658	-9.76562	-20.1416	-27.1606	-39.6729	-63.4766	338.745	216.064	118.408	45.166	-22.2778	-106.506	-209.045	-292.053	-404.968	-628.052	-1041.26
	114.7	28.9917	18.6157	13.4277	6.10352	0.915527	-2.74658	-10.6812	-21.6675	-28.3813	-34.79	-62.8662	333.557	218.201	121.155	45.4712	-24.4141	-106.506	-208.13	-290.222	-406.189	-612.183	-1044.31
	114.8	28.3813	18.6157	12.5122	5.49316	0	-1.83105	-10.9863	-21.9727	-29.9072	-33.2642	-63.7817	333.557	214.233	122.375	50.0488	-24.7192	-107.422	-203.857	-284.729	-410.767	-609.741	-1059.27
	114.9	27.1606	15.2588	10.0708	3.05176	0	-3.05176	-10.376	-20.4468	-29.6021	-32.959	-64.0869	337.524	213.928	122.07	46.0815	-25.0244	-108.337	-203.247	-284.729	-412.292	-611.267	-1088.87
	115	29.6021	19.8364	8.54492	6.10352	-0.610352	-4.27246	-9.76562	-18.6157	-29.2969	-35.7056	-64.6973	332.642	214.539	118.408	44.2505	-25.6348	-104.37	-201.416	-287.17	-406.494	-613.403	-1094.06
	115.1	33.2642	19.5312	11.5967	6.40869	-1.2207	-4.57764	-9.76562	-17.7002	-27.771	-36.3159	-66.2231	333.252	217.896	119.324	43.335	-26.5503	-102.539	-198.059	-290.527	-401.306	-624.084	-1067.81
	115.2	30.8228	18.9209	7.32422	5.79834	0	-2.74658	-12.8174	-18.0054	-28.6865	-33.8745	-66.8335	337.219	220.337	119.324	46.0815	-24.4141	-101.929	-194.702	-286.56	-400.391	-637.512	-1062.32
	115.3	29.2969	17.0898	8.23975	5.79834	0.305176	-0.305176	-12.8174	-17.395	-28.3813	-32.0435	-67.749	337.524	217.285	122.375	44.5557	-26.2451	-99.1821	-195.618	-275.879	-393.677	-638.733	-1083.37
	115.4	30.2124	16.4795	11.9019	5.49316	0	-5.79834	-10.376	-17.395	-29.6021	-33.2642	-65.3076	337.524	207.52	125.427	45.4712	-27.771	-100.403	-201.111	-270.081	-387.268	-631.104	-1087.65
	115.5	31.1279	16.7847	10.376	3.96729	0	-6.10352	-9.46045	-18.6157	-28.6865	-35.4004	-63.1714	338.745	204.163	124.207	44.8608	-29.6021	-104.065	-209.045	-264.893	-386.353	-628.052	-1077.27
	115.6	32.3486	19.2261	9.76562	4.57764	0	-6.40869	-9.46045	-18.6157	-28.6865	-33.5693	-64.0869	339.05	206.299	121.46	44.8608	-27.771	-105.591	-211.182	-267.639	-385.132	-627.441	-1063.54
	115.7	35.4004	20.1416	10.6812	3.35693	1.2207	-5.49316	-10.9863	-21.0571	-28.9917	-32.6538	-61.3403	341.492	208.435	121.46	48.5229	-25.3296	-100.708	-209.961	-272.827	-386.047	-623.779	-1041.26
	115.8	33.2642	17.0898	10.0708	3.96729	0.305176	-4.88281	-11.9019	-20.752	-28.3813	-33.2642	-58.2886	349.426	209.961	120.544	48.5229	-22.2778	-100.098	-211.182	-278.625	-389.709	-626.221	-1032.71
	115.9	30.2124	17.0898	9.76562	5.79834	-0.610352	-3.66211	-10.376	-21.0571	-29.6021	-32.959	-53.7109	352.173	208.74	120.544	47.3022	-25.0244	-101.624	-216.37	-276.489	-392.151	-629.272	-1040.95
	116	31.4331	17.0898	10.9863	4.57764	2.74658	-3.66211	-10.376	-20.4468	-28.9917	-36.3159	-53.1006	347.9	205.688	122.986	47.6074	-28.9917	-100.708	-218.811	-278.015	-391.541	-634.766	-1047.06
	116.1	30.5176	16.4795	12.8174	3.66211	3.66211	-3.96729	-11.5967	-20.4468	-29.6021	-35.0952	-53.7109	350.952	204.468	118.713	47.3022	-28.6865	-98.5718	-216.37	-281.677	-388.489	-644.531	-1065.67
	116.2	30.8228	17.395	10.6812	5.18799	2.13623	-3.66211	-12.8174	-19.8364	-27.771	-34.1797	-55.542	346.68	206.909	116.272	45.166	-25.9399	-101.318	-207.52	-283.508	-386.963	-657.654	-1069.95
	116.3	30.5176	18.0054	10.376	4.57764	1.2207	-3.96729	-11.9019	-19.2261	-25.9399	-36.6211	-56.1523	343.628	209.351	113.22	46.0815	-26.2451	-100.403	-207.52	-283.203	-386.658	-673.218	-1052.86
	116.4	31.4331	16.4795	11.9019	4.57764	2.44141	-5.18799	-12.8174	-20.1416	-26.8555	-35.7056	-56.4575	342.407	209.351	112.915	45.4712	-27.4658	-101.318	-208.13	-280.457	-391.235	-677.185	-1022.34
	116.5	29.2969	12.8174	10.376	5.49316	3.05176	-6.40869	-12.207	-19.2261	-29.6021	-35.0952	-56.1523	343.018	206.909	115.356	45.166	-26.8555	-101.013	-206.909	-274.048	-398.254	-671.387	-1003.72
	116.6	30.2124	14.0381	11.2915	5.49316	3.35693	-4.27246	-10.6812	-19.5312	-29.9072	-36.3159	-55.8472	340.881	204.773	115.356	45.166	-25.9399	-98.5718	-205.383	-263.977	-399.475	-668.945	-1008.3
	116.7	32.6538	16.1743	11.2915	5.79834	2.74658	-1.83105	-9.46045	-16.4795	-28.9917	-36.6211	-55.8472	340.881	204.773	115.051	45.4712	-21.9727	-97.0459	-203.552	-265.503	-401.001	-664.978	-1016.85
	116.8	29.6021	18.6157	12.207	7.01904	-1.2207	-3.35693	-9.76562	-15.564	-30.2124	-40.5884	-54.9316	342.407	205.383	115.967	47.3022	-25.0244	-96.1304	-201.111	-270.081	-397.034	-661.621	-1010.44
	116.9	30.2124	19.2261	13.1226	6.71387	-0.305176	-3.96729	-8.54492	-16.4795	-30.2124	-39.6729	-54.6265	345.764	204.468	114.746	47.3022	-26.8555	-95.8252	-198.364	-269.775	-394.592	-662.537	-994.568
	117	30.5176	19.2261	9.46045	3.66211	1.2207	-4.88281	-7.93457	-17.0898	-30.2124	-39.3677	-57.9834	355.835	204.773	113.831	46.9971	-25.6348	-94.9097	-194.397	-274.963	-398.56	-657.654	-986.633
	117.1	27.1606	18.6157	10.6812	6.10352	0.915527	-5.18799	-8.8501	-16.7847	-29.6021	-40.5884	-61.0352	363.159	205.078	115.662	50.0488	-27.1606	-90.9424	-197.144	-281.067	-400.085	-650.33	-990.295
	117.2	27.4658	18.6157	10.9863	4.88281	0.610352	-3.05176	-8.23975	-17.7002	-29.2969	-38.147	-59.5093	363.159	201.721	116.577	51.5747	-28.9917	-90.9424	-202.332	-281.067	-395.203	-650.024	-989.075
	117.3	29.2969	19.5312	13.7329	5.49316	0	0.305176	-8.54492	-17.395	-28.9917	-36.9263	-58.2886	358.582	203.247	117.493	50.0488	-27.771	-93.0786	-203.857	-278.625	-390.32	-652.771	-981.14
	117.4	28.9917	20.4468	12.8174	4.88281	0.610352	-4.57764	-7.62939	-16.1743	-29.6021	-36.0107	-56.7627	358.276	207.825	117.493	47.6074	-27.1606	-95.2148	-204.163	-280.762	-388.794	-646.667	-993.652
	117.5	28.0762	21.9727	10.9863	5.79834	1.83105	-5.18799	-7.62939	-15.564	-28.3813	-34.1797	-56.1523	358.887	215.149	115.051	47.9126	-25.3296	-94.9097	-203.857	-276.489	-393.982	-637.817	-1022.64
	117.6	28.3813	20.752	10.9863	4.88281	2.13623	-3.05176	-7.62939	-15.2588	-26.5503	-35.7056	-54.9316	363.464	218.811	112.915	45.4712	-24.7192	-97.6562	-205.078	-271.912	-397.644	-633.545	-1050.72
	117.7	29.2969	21.9727	10.9863	5.49316	1.83105	-3.35693	-8.54492	-17.7002	-25.3296	-36.0107	-54.6265	372.009	215.759	114.136	44.8608	-26.8555	-98.5718	-206.299	-274.353	-396.118	-620.728	-1050.72
	117.8	28.9917	20.4468	10.6812	6.71387	2.13623	-3.35693	-8.23975	-17.7002	-26.2451	-37.5366	-55.8472	372.314	210.876	115.356	43.9453	-26.5503	-100.708	-205.688	-276.794	-395.508	-610.352	-1043.7
	117.9	26.2451	16.7847	8.54492	7.62939	2.44141	-2.44141	-8.54492	-17.395	-26.8555	-35.4004	-54.6265	371.399	205.383	118.408	45.166	-26.5503	-100.098	-202.332	-276.794	-385.437	-599.976	-1041.26
	118	29.2969	16.4795	11.2915	7.01904	2.74658	-3.05176	-7.62939	-17.0898	-27.1606	-36.6211	-54.6265	359.497	197.754	118.713	47.3022	-25.0244	-97.3511	-202.942	-270.996	-382.996	-595.093	-1037.6
	118.1	29.9072	16.1743	13.4277	5.18799	0.915527	-3.66211	-8.54492	-17.7002	-26.8555	-35.0952	-51.5747	354.614	199.585	115.356	49.7437	-25.0244	-94.9097	-205.994	-265.808	-393.372	-599.06	-1034.55
	118.2	29.2969	19.2261	13.7329	5.18799	0.305176	-2.74658	-8.54492	-17.395	-27.771	-33.2642	-52.1851	362.549	205.078	112.61	48.2178	-24.4141	-95.8252	-207.825	-267.944	-399.475	-614.014	-1035.16
	118.3	29.6021	19.8364	10.6812	7.93457	1.83105	-2.44141	-7.01904	-18.9209	-26.5503	-34.79	-54.9316	365.601	207.214	113.22	47.9126	-25.9399	-97.6562	-208.13	-267.944	-391.541	-629.883	-1043.7
	118.4	29.2969	14.6484	8.54492	7.01904	0.915527	-1.83105	-8.23975	-18.9209	-23.4985	-34.4849	-52.4902	360.413	210.266	113.22	49.1333	-26.2451	-102.234	-208.74	-266.113	-387.573	-634.155	-1046.14
	118.5	26.5503	17.0898	9.76562	7.01904	1.83105	-3.05176	-8.8501	-18.0054	-23.8037	-33.8745	-52.1851	354.309	214.844	113.22	49.1333	-25.9399	-100.403	-208.435	-261.841	-387.878	-625.916	-1053.16
	118.6	27.1606	18.0054	10.0708	5.79834	0.610352	-5.49316	-8.23975	-18.6157	-26.8555	-33.2642	-52.7954	351.868	213.013	116.882	46.6919	-26.5503	-102.844	-210.571	-255.432	-391.235	-627.747	-1056.21
	118.7	29.2969	18.0054	9.46045	5.79834	1.52588	-2.44141	-8.8501	-19.5312	-28.0762	-32.0435	-58.2886	354.919	207.825	119.934	49.1333	-29.6021	-107.117	-211.792	-258.789	-398.865	-641.174	-1068.12
	118.8	28.9917	22.2778	9.46045	4.27246	2.13623	-4.27246	-8.8501	-17.0898	-28.6865	-29.6021	-63.7817	358.276	206.909	121.46	48.8281	-30.8228	-103.149	-215.149	-266.724	-401.306	-646.362	-1074.22
	118.9	27.4658	21.3623	12.207	6.40869	1.83105	-4.88281	-8.23975	-15.564	-25.6348	-30.2124	-63.1714	357.666	209.961	119.019	45.4712	-27.4658	-101.013	-217.896	-270.691	-397.949	-641.785	-1062.93
	119	30.5176	20.1416	11.9019	3.96729	1.52588	-4.27246	-6.10352	-14.6484	-27.1606	-28.9917	-61.0352	352.783	211.487	117.493	45.166	-26.5503	-100.708	-216.37	-276.184	-403.442	-635.071	-1060.49
	119.1	29.9072	19.8364	10.9863	6.40869	0	-4.57764	-6.71387	-15.2588	-27.4658	-30.2124	-63.4766	345.764	210.571	121.46	43.6401	-24.4141	-104.37	-217.896	-287.17	-404.053	-624.39	-1048.58
	119.2	27.771	19.2261	10.376	9.15527	2.13623	-5.18799	-7.93457	-17.395	-29.9072	-33.5693	-62.561	344.238	212.097	124.207	44.8608	-23.4985	-105.896	-216.98	-291.443	-397.034	-619.507	-1021.73
	119.3	27.1606	15.8691	10.0708	7.93457	2.13623	-2.74658	-8.8501	-18.0054	-29.9072	-30.8228	-60.1196	340.576	211.487	123.901	47.6074	-22.2778	-102.539	-213.928	-292.664	-396.118	-631.104	-1001.59
	119.4	30.5176	18.6157	10.0708	6.71387	0.915527	-3.05176	-7.62939	-15.564	-28.3813	-31.7383	-55.542	339.966	209.045	124.207	47.6074	-24.7192	-98.877	-208.13	-296.631	-394.897	-635.986	-975.952
	119.5	29.6021	21.3623	10.0708	4.27246	-1.2207	-4.88281	-8.8501	-14.6484	-27.4658	-31.1279	-54.3213	335.388	207.214	125.427	49.1333	-26.2451	-101.624	-209.656	-296.631	-396.118	-636.292	-954.59
	119.6	28.9917	19.8364	14.6484	4.27246	2.13623	-2.74658	-8.54492	-15.2588	-27.4658	-33.2642	-53.7109	328.674	200.195	124.207	46.0815	-26.5503	-106.201	-216.064	-291.748	-399.17	-646.667	-966.492
	119.7	30.2124	18.9209	11.9019	5.49316	3.05176	-3.66211	-8.8501	-17.0898	-29.6021	-32.0435	-55.542	323.792	198.059	122.986	47.3022	-25.0244	-104.675	-217.285	-287.17	-403.137	-653.381	-973.816
	119.8	27.4658	19.2261	12.8174	5.79834	1.83105	-3.05176	-10.9863	-19.2261	-28.9917	-32.0435	-58.8989	320.129	199.585	124.207	48.2178	-24.4141	-104.37	-221.558	-280.762	-401.611	-649.719	-983.582
	119.9	25.3296	17.0898	11.9019	5.18799	0.915527	-2.74658	-11.9019	-16.7847	-29.2969	-29.9072	-59.2041	316.772	198.669	126.038	47.9126	-25.3296	-104.675	-226.135	-268.555	-398.254	-647.278	-999.451
	120	29.6021	18.9209	10.0708	4.57764	2.44141	-3.35693	-10.0708	-15.8691	-28.9917	-30.2124	-58.2886	317.383	205.383	126.648	48.5229	-28.0762	-104.98	-231.018	-267.029	-397.644	-653.076	-998.84
	120.1	32.0435	18.9209	12.8174	5.49316	3.05176	-3.96729	-8.8501	-18.6157	-28.6865	-33.8745	-57.0679	320.129	210.571	127.563	50.9644	-30.2124	-104.98	-234.07	-272.217	-392.761	-659.485	-997.62
	120.2	29.9072	17.395	14.0381	6.40869	3.05176	-2.74658	-9.46045	-19.2261	-28.0762	-36.6211	-56.7627	324.402	207.52	129.7	48.5229	-28.9917	-105.591	-234.07	-274.048	-386.353	-657.654	-1026.31
	120.3	28.6865	19.8364	11.5967	7.62939	0.610352	-3.05176	-8.23975	-20.1416	-28.3813	-37.5366	-56.1523	328.369	203.552	130.31	46.0815	-26.5503	-104.98	-227.051	-271.301	-377.502	-651.855	-1063.23
	120.4	28.0762	20.1416	8.54492	7.62939	1.2207	-2.44141	-9.15527	-21.0571	-27.771	-39.3677	-54.6265	335.693	203.857	133.057	46.0815	-25.9399	-106.201	-217.285	-268.555	-374.451	-639.038	-1070.25
	120.5	26.8555	17.7002	9.15527	6.71387	2.44141	-0.610352	-9.76562	-20.1416	-26.8555	-39.6729	-57.9834	336.304	206.299	130.615	46.3867	-26.2451	-106.506	-211.182	-269.165	-378.418	-618.286	-1068.42
	120.6	26.2451	15.564	12.8174	5.18799	1.83105	-3.35693	-10.376	-19.8364	-28.0762	-39.0625	-60.4248	330.505	208.13	130.31	47.3022	-25.9399	-105.896	-203.857	-272.522	-384.216	-603.943	-1061.71
	120.7	28.3813	17.0898	15.2588	5.49316	2.13623	-4.88281	-12.207	-20.1416	-29.2969	-38.4521	-59.8145	324.707	206.299	130.31	46.9971	-25.3296	-105.286	-197.449	-275.879	-388.489	-607.91	-1057.43
	120.8	31.1279	17.0898	15.2588	5.49316	1.83105	-2.74658	-11.5967	-18.6157	-29.2969	-38.4521	-57.0679	323.792	205.383	126.953	44.8608	-23.4985	-103.455	-194.702	-276.489	-393.372	-619.507	-1055.3
	120.9	30.5176	19.8364	12.8174	4.88281	1.2207	-2.74658	-10.0708	-18.9209	-26.8555	-37.5366	-56.1523	324.402	209.351	125.732	44.2505	-26.2451	-99.7925	-195.618	-274.963	-393.066	-628.052	-1071.47
	121	30.5176	17.0898	12.5122	4.27246	-0.610352	-3.66211	-10.376	-20.752	-28.6865	-37.5366	-54.0161	329.285	216.064	124.817	46.9971	-27.1606	-96.1304	-198.059	-274.353	-393.982	-633.85	-1106.57
	121.1	32.959	16.1743	10.6812	5.18799	-0.610352	-2.74658	-9.46045	-17.0898	-28.0762	-39.0625	-54.9316	331.116	219.116	124.817	47.9126	-27.4658	-97.9614	-203.247	-274.353	-396.729	-638.428	-1111.45
	121.2	29.9072	19.8364	10.9863	7.01904	3.35693	-1.2207	-9.46045	-17.395	-28.0762	-39.3677	-54.3213	331.421	216.064	126.038	47.3022	-24.7192	-97.6562	-207.825	-273.132	-398.56	-638.428	-1083.37
	121.3	29.6021	19.8364	10.6812	4.88281	3.96729	-2.44141	-9.76562	-18.6157	-28.9917	-39.3677	-52.4902	338.44	212.708	129.7	46.3867	-23.8037	-99.4873	-213.928	-273.438	-399.17	-643.005	-1080.02
	121.4	28.3813	21.3623	14.6484	3.66211	3.05176	-5.18799	-7.62939	-17.7002	-30.2124	-33.8745	-52.4902	345.154	211.487	128.784	44.2505	-22.8882	-103.149	-210.571	-274.048	-400.696	-644.226	-1093.44
	121.5	29.6021	21.6675	13.4277	3.66211	2.44141	-4.57764	-9.15527	-17.0898	-28.0762	-37.5366	-54.3213	344.849	215.149	126.648	44.8608	-22.2778	-103.149	-205.994	-276.489	-401.001	-659.485	-1075.74
	121.6	27.771	18.0054	10.6812	4.88281	1.83105	-2.74658	-10.376	-16.4795	-26.5503	-40.8936	-54.6265	341.797	215.454	126.343	46.6919	-25.9399	-102.234	-203.857	-278.931	-400.696	-675.659	-1051.03
	121.7	28.3813	17.0898	10.0708	5.79834	2.13623	-4.88281	-8.8501	-17.0898	-27.1606	-39.978	-54.3213	338.135	213.623	129.7	46.0815	-23.8037	-101.013	-206.909	-281.067	-402.222	-686.035	-1032.41
	121.8	27.1606	19.2261	11.9019	5.79834	2.74658	-3.35693	-10.9863	-18.9209	-28.9917	-39.6729	-54.0161	344.543	209.045	130.005	43.9453	-23.8037	-102.844	-210.571	-278.625	-398.254	-690.002	-1030.27
	121.9	25.6348	16.7847	10.9863	7.32422	4.27246	-1.52588	-10.0708	-20.752	-30.2124	-37.5366	-54.0161	353.699	205.688	126.343	43.9453	-22.8882	-101.318	-211.487	-274.963	-393.066	-700.073	-1042.18
	122	28.9917	17.0898	10.376	7.62939	2.74658	-3.05176	-10.9863	-16.7847	-29.2969	-33.5693	-51.8799	344.238	206.299	125.427	44.8608	-23.1934	-99.1821	-209.351	-269.775	-385.437	-706.787	-1060.79
	122.1	26.5503	19.2261	10.6812	7.01904	2.44141	-3.05176	-10.376	-15.2588	-27.1606	-35.7056	-50.354	329.285	207.52	130.31	45.7764	-25.9399	-99.7925	-212.402	-270.386	-382.08	-696.106	-1087.04
	122.2	26.8555	19.8364	11.9019	5.79834	1.83105	-3.66211	-10.9863	-16.7847	-26.8555	-39.3677	-51.8799	318.604	207.825	130.92	43.9453	-24.7192	-101.929	-214.233	-273.743	-387.268	-681.763	-1098.33
	122.3	28.9917	20.4468	11.5967	7.01904	-0.610352	-3.66211	-11.2915	-18.9209	-27.771	-36.3159	-52.1851	313.11	208.13	127.563	41.8091	-25.6348	-104.37	-216.37	-275.879	-396.118	-675.964	-1095.89
	122.4	29.2969	20.1416	13.1226	6.71387	1.52588	-1.52588	-11.2915	-17.0898	-25.6348	-36.3159	-51.5747	310.669	209.351	123.901	44.8608	-26.8555	-108.337	-215.454	-269.165	-405.273	-676.27	-1105.65
	122.5	28.9917	20.1416	11.2915	7.01904	1.2207	-1.83105	-10.376	-16.1743	-25.3296	-34.1797	-48.8281	315.857	207.825	124.512	46.0815	-24.7192	-107.422	-213.013	-267.029	-406.494	-673.523	-1122.74
	122.6	28.0762	17.0898	7.01904	6.10352	1.83105	-2.74658	-11.2915	-16.7847	-26.8555	-31.7383	-47.6074	321.045	201.721	122.07	45.7764	-25.6348	-103.76	-213.928	-266.724	-398.865	-671.997	-1125.18
	122.7	25.6348	17.0898	10.6812	5.18799	1.52588	-3.66211	-10.9863	-16.4795	-28.3813	-32.959	-49.1333	320.435	198.669	121.765	46.0815	-28.0762	-100.403	-211.487	-265.808	-398.56	-663.452	-1132.81
	122.8	25.0244	17.7002	13.1226	4.27246	0.915527	-5.18799	-10.9863	-16.1743	-26.5503	-31.7383	-51.8799	315.247	201.111	125.122	47.3022	-26.5503	-94.6045	-213.928	-265.198	-411.377	-655.518	-1135.56
	122.9	28.3813	19.2261	10.9863	5.79834	2.13623	-6.71387	-11.5967	-15.564	-25.3296	-32.959	-54.0161	312.5	198.059	126.038	49.4385	-24.7192	-96.7407	-216.37	-268.555	-421.143	-651.55	-1126.4
	123	26.2451	21.0571	10.376	4.27246	2.44141	-3.66211	-9.76562	-15.8691	-25.0244	-34.79	-57.0679	307.922	193.787	127.258	48.2178	-26.2451	-97.3511	-212.402	-271.606	-421.753	-661.011	-1128.85
	123.1	27.4658	19.5312	12.207	4.27246	1.83105	-3.05176	-9.76562	-16.7847	-23.8037	-36.0107	-57.9834	310.059	196.533	128.174	46.6919	-25.6348	-98.2666	-216.064	-271.301	-418.091	-679.321	-1138.92
	123.2	29.9072	16.4795	11.9019	4.27246	2.13623	-2.74658	-10.0708	-16.4795	-25.3296	-35.7056	-56.7627	317.688	201.416	127.869	46.0815	-26.2451	-101.624	-213.928	-272.217	-417.786	-694.58	-1132.2
	123.3	28.9917	17.0898	13.4277	4.57764	3.66211	-3.35693	-12.207	-15.2588	-23.4985	-34.1797	-54.0161	318.604	199.89	127.563	46.3867	-28.0762	-101.624	-205.688	-271.912	-412.598	-708.313	-1113.89
	123.4	28.3813	17.7002	12.5122	5.49316	2.74658	-4.57764	-12.5122	-14.9536	-25.9399	-34.4849	-54.9316	318.604	196.838	130.005	46.3867	-29.9072	-98.2666	-205.688	-277.1	-405.273	-714.722	-1095.89
	123.5	29.2969	19.8364	14.6484	5.49316	2.74658	-2.44141	-11.2915	-14.3433	-25.6348	-34.79	-54.0161	320.74	198.669	133.667	45.7764	-30.5176	-94.2993	-213.928	-288.696	-395.203	-708.923	-1085.51
	123.6	29.6021	19.8364	11.5967	5.18799	2.13623	-3.96729	-7.32422	-14.9536	-26.5503	-36.3159	-54.9316	319.519	204.468	135.498	47.3022	-29.9072	-94.2993	-216.675	-293.274	-387.878	-706.787	-1097.41
	123.7	30.8228	19.5312	10.0708	3.96729	2.74658	-3.35693	-8.23975	-14.9536	-27.4658	-35.0952	-54.0161	316.162	205.078	135.498	45.166	-28.6865	-92.1631	-215.454	-296.326	-386.047	-699.463	-1115.72
	123.8	29.9072	21.3623	10.9863	5.49316	2.44141	-3.66211	-10.376	-16.4795	-25.9399	-33.5693	-53.4058	317.383	203.857	136.108	45.166	-27.771	-92.7734	-216.37	-288.086	-387.878	-700.989	-1136.17
	123.9	29.9072	19.8364	10.9863	5.79834	3.05176	-5.18799	-11.9019	-17.395	-26.2451	-31.7383	-52.7954	316.467	207.825	137.634	46.6919	-27.1606	-93.0786	-214.539	-275.269	-391.541	-703.125	-1134.34
	124	28.0762	18.9209	10.9863	6.71387	3.05176	-1.83105	-11.2915	-15.564	-27.4658	-33.5693	-50.354	321.96	207.52	136.719	45.4712	-28.3813	-90.332	-213.318	-270.691	-400.391	-700.989	-1120.91
	124.1	28.3813	18.9209	9.46045	5.79834	3.05176	-2.74658	-11.9019	-16.7847	-28.9917	-32.6538	-52.1851	325.317	203.552	131.226	45.166	-29.9072	-94.6045	-213.318	-270.386	-402.832	-698.853	-1128.54
	124.2	31.4331	19.8364	10.6812	6.10352	3.66211	-3.66211	-12.8174	-17.395	-29.2969	-32.0435	-52.1851	324.097	201.416	129.395	43.9453	-28.3813	-94.9097	-213.013	-279.236	-406.799	-688.171	-1133.12
	124.3	32.0435	17.0898	10.6812	5.79834	2.44141	-4.57764	-11.2915	-19.5312	-29.6021	-31.1279	-50.9644	327.454	207.214	130.005	45.4712	-27.1606	-93.3838	-213.623	-291.138	-407.104	-681.152	-1125.79
	124.4	32.0435	16.4795	11.9019	7.32422	0.610352	-1.83105	-7.62939	-18.6157	-28.6865	-32.3486	-53.1006	327.148	215.454	133.057	43.0298	-26.5503	-95.2148	-216.675	-293.579	-404.358	-685.12	-1120.91
	124.5	1936.04	1636.96	1334.23	1028.75	729.675	432.129	115.967	-207.825	-521.24	-819.397	-1148.68	1600.95	1282.35	1014.4	765.076	485.84	212.402	-132.141	-432.434	-764.16	-1262.21	-1918.03
	124.6	7781.37	6623.54	5440.67	4225.16	3015.44	1777.65	504.761	-790.405	-2053.83	-3271.18	-4523.93	5875.85	4916.08	4020.08	3177.19	2200.62	1228.94	159.912	-876.16	-1934.81	-3123.47	-4461.67
	124.7	9563.6	8118.9	6636.05	5133.97	3634.03	2119.75	595.398	-927.124	-2449.95	-3941.96	-5475.46	8127.44	6847.53	5569.15	4310.61	2977.6	1669.01	283.508	-1041.87	-2400.21	-3882.45	-5440.67
	124.8	7997.13	6761.47	5504.15	4245.61	2986.15	1726.38	477.6	-754.089	-2009.28	-3253.48	-4530.94	7699.28	6482.24	5229.49	3984.99	2719.12	1506.35	232.849	-952.454	-2181.09	-3526	-4870.61
	124.9	6122.13	5163.27	4198.3	3232.42	2270.81	1310.73	357.971	-576.782	-1531.98	-2488.71	-3463.13	6333.01	5322.57	4267.88	3242.19	2173.46	1189.88	143.433	-818.481	-1812.13	-2912.29	-3971.25
	125	4703.06	3960.88	3218.08	2476.5	1739.2	1005.25	272.522	-446.777	-1181.34	-1918.64	-2667.54	4985.96	4185.79	3334.35	2535.4	1665.95	895.386	66.2231	-691.528	-1478.58	-2359.01	-3186.04
	125.1	3620.91	3042.3	2471.31	1902.47	1334.53	768.738	206.299	-350.952	-911.865	-1479.49	-2055.97	3851.01	3229.06	2553.1	1941.83	1250.61	647.888	-0.610352	-585.022	-1200.26	-1901.25	-2551.27
	125.2	2777.71	2327.27	1890.26	1453.55	1020.81	584.412	154.419	-270.386	-703.125	-1139.83	-1580.51	2935.18	2460.02	1925.05	1460.27	919.189	453.796	-55.542	-499.878	-980.835	-1530.76	-2045.29
	125.3	2122.8	1776.73	1442.57	1109.92	778.809	447.693	116.882	-207.52	-544.434	-879.211	-1215.52	2212.52	1852.42	1429.75	1086.12	655.823	308.838	-97.9614	-431.213	-806.885	-1237.79	-1649.78
	125.4	1621.09	1354.98	1101.07	845.032	593.872	339.966	88.501	-162.354	-423.889	-675.354	-933.533	1654.05	1382.45	1042.48	794.678	453.186	193.787	-132.141	-377.197	-672.302	-1013.18	-1346.74
	125.5	1237.79	1031.8	838.318	642.09	449.829	254.211	64.3921	-125.732	-328.064	-519.714	-718.079	1225.59	1025.39	741.882	564.88	296.021	98.2666	-156.86	-340.271	-565.491	-843.201	-1108.09
	125.6	943.909	787.354	636.902	487.061	339.661	191.65	42.4194	-98.877	-252.686	-400.085	-552.063	899.353	746.155	513	391.235	173.035	25.6348	-174.561	-309.753	-481.873	-707.092	-918.274
	125.7	715.637	596.008	480.652	368.042	258.179	147.095	30.2124	-79.9561	-195.007	-310.059	-425.415	649.414	528.564	340.271	260.925	77.8198	-32.6538	-194.092	-283.508	-422.668	-592.041	-768.738
	125.8	543.213	446.777	364.38	278.625	193.481	108.948	21.0571	-65.3076	-154.114	-241.394	-328.369	457.153	365.295	208.13	163.574	3.05176	-78.125	-208.74	-263.977	-382.385	-506.592	-650.94
	125.9	410.767	339.05	276.794	209.045	145.264	77.8198	11.9019	-52.7954	-122.375	-187.073	-255.432	309.448	238.037	107.727	83.9233	-53.7109	-106.201	-220.032	-247.803	-349.731	-447.998	-563.354
	126	307.007	256.348	205.078	155.64	108.032	57.6782	3.66211	-43.6401	-96.7407	-144.043	-195.923	198.059	139.16	32.6538	22.8882	-93.3838	-127.563	-227.661	-235.901	-326.233	-407.104	-505.066
	126.1	230.103	189.819	150.757	113.831	79.6509	41.5039	-0.305176	-35.0952	-75.3784	-111.694	-150.757	110.474	64.3921	-25.0244	-22.583	-122.681	-148.926	-231.018	-231.323	-304.871	-375.671	-467.529
	126.2	173.34	141.602	112.305	82.3975	57.373	28.3813	-1.52588	-29.9072	-60.73	-89.4165	-118.103	44.2505	10.376	-68.3594	-55.542	-148.315	-156.86	-234.375	-227.356	-286.865	-343.628	-441.589
	126.3	126.038	104.675	82.3975	58.8989	39.3677	15.8691	-4.88281	-25.3296	-49.4385	-71.7163	-92.1631	-6.10352	-29.2969	-101.929	-83.6182	-169.983	-162.048	-240.784	-228.271	-271.912	-317.993	-419.922
	126.4	92.1631	74.4629	57.373	41.1987	26.2451	10.0708	-7.01904	-21.3623	-41.8091	-57.373	-73.2422	-45.4712	-61.6455	-132.141	-108.643	-183.411	-167.236	-252.38	-223.999	-260.925	-302.124	-391.541
	126.5	63.7817	52.7954	38.4521	26.5503	17.395	4.57764	-9.76562	-19.5312	-35.0952	-48.5229	-59.2041	-71.106	-87.2803	-152.283	-127.258	-198.669	-169.983	-256.042	-221.863	-251.465	-289.612	-368.042
	126.6	44.8608	34.4849	27.1606	15.2588	9.76562	2.13623	-13.7329	-19.8364	-29.6021	-38.7573	-45.7764	-88.501	-108.032	-168.457	-141.602	-208.13	-175.171	-254.211	-222.168	-249.634	-283.203	-351.868
	126.7	29.6021	24.1089	15.8691	6.40869	3.66211	-0.305176	-12.5122	-17.395	-26.5503	-32.0435	-38.7573	-106.506	-119.934	-177.917	-150.452	-212.402	-182.495	-249.939	-220.947	-245.667	-270.691	-341.187
	126.8	19.2261	14.9536	7.01904	-3.05176	0.305176	-3.96729	-14.0381	-14.9536	-21.9727	-26.2451	-32.6538	-119.934	-131.226	-188.293	-158.997	-223.083	-189.514	-245.972	-220.642	-242.92	-256.958	-333.557
	126.9	12.8174	6.40869	3.35693	-7.01904	-2.44141	-9.46045	-12.207	-15.8691	-19.5312	-23.4985	-27.4658	-131.836	-139.16	-196.533	-168.762	-231.323	-195.007	-245.361	-216.37	-239.258	-245.667	-326.538
	127	4.57764	0.610352	0.610352	-10.0708	-6.10352	-9.15527	-13.4277	-15.8691	-18.0054	-21.0571	-21.3623	-144.043	-144.653	-196.838	-172.119	-234.07	-197.449	-248.108	-209.961	-231.323	-233.765	-326.843
	127.1	-1.52588	-2.74658	-3.05176	-11.5967	-7.62939	-6.40869	-14.0381	-16.7847	-17.7002	-19.2261	-17.395	-160.828	-146.79	-195.007	-169.067	-237.427	-201.416	-251.465	-204.163	-223.083	-226.746	-330.2
	127.2	-3.05176	-6.40869	-8.8501	-14.0381	-9.46045	-7.93457	-13.4277	-14.9536	-17.0898	-17.7002	-17.395	-171.509	-148.621	-193.787	-166.931	-242.004	-205.078	-251.465	-201.721	-220.642	-221.252	-329.895
	127.3	-7.62939	-6.71387	-10.0708	-15.564	-10.0708	-10.9863	-13.4277	-14.3433	-16.4795	-16.1743	-16.7847	-177.917	-149.841	-190.43	-168.762	-246.277	-207.214	-243.225	-198.975	-214.539	-216.37	-323.792
	127.4	-10.9863	-8.23975	-11.2915	-16.4795	-10.0708	-11.2915	-15.2588	-13.1226	-17.0898	-16.1743	-14.3433	-183.105	-148.315	-186.768	-168.152	-251.465	-205.383	-234.985	-193.481	-210.571	-214.539	-321.35
	127.5	-10.0708	-11.2915	-13.1226	-18.0054	-12.207	-11.9019	-13.7329	-14.0381	-14.6484	-15.2588	-13.1226	-183.411	-151.978	-187.378	-168.152	-250.549	-208.435	-231.628	-195.007	-211.792	-216.98	-322.876
	127.6	-10.9863	-12.5122	-14.9536	-18.0054	-12.8174	-14.0381	-13.1226	-12.8174	-11.5967	-11.5967	-12.5122	-184.021	-155.334	-199.585	-170.288	-250.549	-207.214	-227.966	-195.007	-214.539	-217.896	-325.623
	127.7	-14.9536	-14.6484	-14.6484	-18.0054	-11.5967	-13.1226	-11.5967	-13.7329	-11.9019	-12.207	-11.9019	-180.054	-162.048	-214.233	-170.593	-250.854	-204.163	-234.985	-191.956	-214.539	-220.642	-320.129
	127.8	-18.6157	-19.8364	-15.8691	-17.395	-11.5967	-13.1226	-12.5122	-14.6484	-13.4277	-11.5967	-10.9863	-179.749	-165.71	-224.304	-174.255	-255.127	-201.111	-243.53	-195.618	-223.083	-224.609	-310.669
	127.9	-17.0898	-19.8364	-15.8691	-16.7847	-12.5122	-11.5967	-14.0381	-14.9536	-15.2588	-9.76562	-11.9019	-180.359	-164.185	-227.051	-173.035	-257.568	-208.74	-248.718	-200.806	-228.271	-226.135	-303.04
	128	-19.5312	-19.8364	-14.6484	-18.9209	-11.9019	-14.0381	-17.7002	-12.8174	-16.1743	-9.15527	-10.0708	-178.528	-164.185	-228.271	-169.678	-252.38	-215.149	-254.822	-198.975	-228.882	-224.304	-301.208
	128.1	-18.6157	-20.752	-15.564	-19.8364	-12.207	-14.0381	-17.7002	-9.46045	-15.2588	-10.0708	-9.76562	-181.274	-163.574	-225.22	-170.593	-247.498	-216.98	-257.263	-197.754	-227.966	-222.473	-302.429
	128.2	-14.3433	-18.9209	-14.6484	-19.2261	-12.5122	-10.9863	-16.7847	-11.5967	-15.2588	-12.207	-10.9863	-184.937	-164.185	-221.863	-177.917	-249.329	-215.759	-251.77	-198.364	-225.22	-220.337	-300.598
	128.3	-13.4277	-18.0054	-13.7329	-16.7847	-13.4277	-13.7329	-17.7002	-15.8691	-13.4277	-14.3433	-9.15527	-189.819	-164.49	-219.116	-178.223	-257.263	-214.844	-241.699	-201.111	-219.421	-220.642	-299.377
	128.4	-11.5967	-21.0571	-16.1743	-17.395	-12.8174	-11.2915	-17.0898	-14.6484	-14.6484	-14.6484	-8.8501	-189.514	-167.236	-214.233	-175.171	-258.789	-213.318	-237.427	-201.111	-213.013	-221.558	-304.871
	128.5	-14.6484	-18.9209	-14.6484	-19.5312	-12.5122	-9.46045	-17.0898	-14.3433	-14.6484	-12.207	-10.9863	-190.125	-169.983	-209.045	-176.392	-256.958	-212.097	-237.122	-196.838	-215.454	-224.609	-313.416
	128.6	-17.395	-19.8364	-13.4277	-19.2261	-13.7329	-11.5967	-17.395	-13.1226	-13.4277	-8.54492	-9.76562	-189.819	-173.035	-201.416	-176.086	-249.939	-216.37	-242.31	-195.923	-222.473	-230.103	-316.467
	128.7	-17.0898	-19.8364	-13.4277	-19.5312	-14.6484	-14.3433	-21.3623	-11.5967	-14.6484	-9.15527	-9.46045	-195.618	-175.781	-201.721	-173.34	-245.667	-225.22	-245.972	-196.533	-225.22	-234.07	-314.331
	128.8	-14.6484	-19.8364	-14.3433	-19.2261	-14.6484	-12.8174	-20.4468	-11.9019	-14.6484	-9.76562	-11.5967	-198.669	-171.814	-206.604	-173.645	-249.329	-231.628	-247.803	-195.007	-223.389	-236.206	-305.176
	128.9	-13.4277	-22.2778	-13.1226	-17.395	-13.7329	-12.207	-17.395	-12.207	-13.4277	-10.0708	-9.76562	-198.975	-171.204	-208.13	-169.373	-255.737	-231.628	-246.277	-195.007	-217.896	-234.07	-302.734
	129	-16.7847	-20.752	-14.9536	-17.0898	-12.5122	-14.9536	-15.564	-10.9863	-12.207	-13.4277	-10.376	-196.533	-173.95	-213.928	-169.983	-254.517	-224.304	-245.361	-197.144	-211.792	-235.901	-307.922
	129.1	-19.2261	-18.9209	-15.8691	-15.564	-12.207	-14.9536	-14.0381	-13.1226	-11.5967	-12.5122	-11.5967	-194.702	-176.392	-223.083	-176.086	-247.498	-220.337	-247.803	-196.228	-211.487	-238.342	-308.838
	129.2	-19.5312	-19.5312	-15.8691	-15.564	-12.5122	-13.1226	-15.2588	-14.9536	-12.8174	-10.0708	-12.5122	-195.007	-178.528	-232.544	-177.917	-239.563	-216.064	-252.991	-195.618	-212.402	-242.004	-310.364
	129.3	-19.5312	-21.0571	-15.2588	-14.9536	-11.5967	-11.2915	-14.9536	-13.1226	-12.8174	-10.0708	-10.0708	-199.89	-183.411	-237.732	-175.171	-242.004	-216.98	-252.38	-191.65	-211.487	-245.361	-321.655
	129.4	-18.0054	-19.5312	-13.1226	-16.4795	-11.2915	-11.5967	-14.6484	-11.9019	-13.7329	-9.46045	-10.9863	-202.942	-182.8	-235.291	-171.509	-245.972	-215.759	-248.108	-189.819	-207.825	-243.225	-330.2
	129.5	-17.395	-19.5312	-12.5122	-16.1743	-11.5967	-12.8174	-13.4277	-10.0708	-12.5122	-10.9863	-9.46045	-207.214	-180.969	-229.492	-171.204	-242.92	-212.402	-244.141	-192.566	-207.825	-243.225	-336.609
	129.6	-16.4795	-21.0571	-14.0381	-15.2588	-12.8174	-13.4277	-13.7329	-11.5967	-11.2915	-7.62939	-10.0708	-217.285	-179.138	-225.22	-178.528	-241.394	-209.045	-240.784	-193.176	-209.045	-237.427	-337.524
	129.7	-15.8691	-22.2778	-16.4795	-14.3433	-14.9536	-11.2915	-12.5122	-13.1226	-12.5122	-10.9863	-11.5967	-218.506	-177.002	-224.915	-183.105	-246.582	-204.163	-241.394	-185.547	-207.214	-237.427	-327.148
	129.8	-18.0054	-22.583	-16.7847	-15.2588	-14.3433	-11.2915	-13.7329	-12.8174	-13.4277	-11.2915	-9.76562	-213.318	-173.95	-225.525	-184.021	-250.549	-203.552	-242.31	-179.443	-210.266	-235.901	-310.669
	129.9	-17.7002	-21.6675	-15.8691	-13.1226	-14.0381	-10.9863	-13.7329	-12.207	-15.2588	-11.9019	-9.15527	-205.078	-170.593	-223.389	-185.852	-247.498	-208.74	-250.549	-177.002	-212.402	-233.459	-301.208
	130	-21.0571	-19.8364	-14.3433	-13.1226	-13.4277	-14.0381	-13.4277	-12.5122	-14.9536	-10.0708	-8.8501	-198.669	-173.035	-215.759	-184.021	-247.498	-209.656	-251.465	-181.274	-213.928	-237.732	-295.41
	130.1	-18.9209	-17.0898	-14.9536	-14.3433	-14.3433	-12.5122	-15.564	-13.4277	-12.8174	-7.01904	-8.54492	-199.585	-177.002	-208.74	-184.631	-250.549	-205.383	-244.751	-182.8	-212.708	-243.53	-296.936
	130.2	-13.4277	-16.4795	-17.395	-15.2588	-15.2588	-12.207	-13.4277	-11.5967	-11.9019	-10.0708	-8.23975	-206.909	-178.223	-208.13	-191.65	-252.075	-201.111	-240.479	-183.105	-212.402	-242.004	-305.481
	130.3	-15.8691	-14.9536	-14.6484	-15.2588	-14.6484	-12.5122	-11.2915	-10.9863	-11.2915	-12.8174	-11.2915	-205.078	-177.002	-204.163	-195.007	-252.686	-198.364	-240.173	-183.411	-214.233	-239.258	-311.89
	130.4	-17.395	-14.6484	-14.9536	-13.7329	-12.207	-11.9019	-12.5122	-14.0381	-13.4277	-9.46045	-10.376	-195.007	-180.969	-206.299	-190.735	-247.803	-197.449	-239.868	-180.969	-216.37	-236.816	-314.941
	130.5	-18.6157	-15.8691	-16.1743	-12.5122	-11.2915	-12.207	-13.7329	-14.6484	-13.7329	-9.76562	-7.62939	-189.819	-180.664	-206.299	-184.937	-247.498	-199.585	-237.732	-178.528	-213.928	-238.037	-319.519
	130.6	-16.1743	-16.4795	-14.6484	-13.7329	-11.5967	-12.207	-13.1226	-14.3433	-11.5967	-9.76562	-8.23975	-185.547	-177.917	-200.5	-182.19	-249.329	-202.637	-242.615	-173.34	-208.74	-237.732	-324.707
	130.7	-14.0381	-16.7847	-15.564	-15.2588	-13.1226	-11.9019	-14.6484	-13.1226	-12.8174	-9.76562	-8.54492	-183.105	-177.917	-204.468	-178.833	-250.549	-204.468	-249.329	-173.95	-208.13	-233.459	-330.505
	130.8	-16.1743	-16.4795	-15.8691	-14.6484	-13.4277	-14.3433	-13.4277	-11.9019	-13.7329	-10.6812	-9.46045	-182.19	-182.8	-212.097	-181.274	-253.601	-200.806	-256.042	-181.274	-208.435	-231.934	-335.083
	130.9	-19.2261	-14.6484	-14.0381	-13.4277	-12.207	-12.8174	-13.4277	-12.207	-13.1226	-11.5967	-11.2915	-180.969	-183.411	-212.097	-184.326	-259.705	-196.228	-260.315	-188.599	-204.468	-233.459	-334.778
	131	-14.9536	-15.564	-15.8691	-12.8174	-12.207	-9.15527	-15.2588	-12.8174	-14.3433	-10.376	-11.9019	-181.885	-177.917	-207.52	-183.411	-264.587	-197.754	-265.198	-191.04	-201.111	-234.07	-324.097
	131.1	-15.2588	-15.8691	-17.0898	-14.0381	-12.8174	-11.2915	-12.8174	-14.0381	-15.2588	-9.76562	-11.2915	-184.631	-174.255	-203.552	-183.105	-259.094	-205.688	-268.555	-187.073	-202.637	-231.323	-310.364
	131.2	-16.7847	-14.0381	-14.0381	-12.5122	-11.9019	-10.6812	-13.1226	-14.6484	-13.4277	-12.207	-10.0708	-185.547	-175.476	-201.721	-184.021	-254.822	-212.402	-270.996	-184.631	-205.994	-227.051	-307.312
	131.3	-17.7002	-14.3433	-12.207	-11.2915	-11.5967	-11.5967	-12.5122	-14.6484	-12.5122	-13.7329	-7.32422	-187.073	-176.697	-196.838	-184.631	-251.465	-213.318	-268.86	-186.157	-208.13	-226.135	-305.176
	131.4	-17.7002	-14.9536	-14.0381	-11.9019	-11.9019	-11.2915	-13.7329	-14.6484	-11.9019	-10.6812	-10.9863	-187.073	-175.171	-192.871	-182.19	-250.854	-211.182	-268.25	-188.599	-207.52	-227.966	-296.326
	131.5	-16.4795	-16.1743	-15.8691	-14.6484	-10.9863	-11.2915	-14.9536	-15.2588	-14.3433	-10.0708	-10.9863	-187.378	-177.307	-192.566	-180.664	-250.854	-208.74	-264.587	-192.261	-207.52	-227.661	-291.138
	131.6	-14.9536	-15.564	-17.7002	-15.8691	-12.5122	-13.4277	-14.6484	-14.6484	-14.3433	-12.5122	-10.376	-185.852	-184.631	-195.007	-181.58	-251.465	-212.402	-258.179	-192.261	-206.299	-225.525	-289.612
	131.7	-14.0381	-16.4795	-17.0898	-15.2588	-14.0381	-13.7329	-12.5122	-14.6484	-13.1226	-13.4277	-10.0708	-188.293	-186.157	-199.28	-181.274	-250.244	-215.149	-254.517	-195.312	-206.604	-229.492	-291.748
	131.8	-15.8691	-15.8691	-17.7002	-14.0381	-12.5122	-11.5967	-13.7329	-14.0381	-13.4277	-11.5967	-10.376	-186.157	-187.073	-199.585	-183.411	-246.887	-219.421	-254.517	-192.871	-205.994	-237.427	-296.326
	131.9	-15.564	-16.1743	-18.9209	-11.9019	-10.6812	-12.5122	-16.1743	-15.8691	-14.3433	-15.8691	-11.5967	-185.852	-183.716	-196.838	-193.481	-245.361	-221.863	-252.38	-189.819	-208.74	-241.699	-301.208
	132	-17.7002	-17.395	-17.0898	-12.8174	-12.5122	-12.8174	-14.6484	-15.2588	-17.0898	-14.3433	-11.2915	-190.735	-187.683	-199.28	-195.007	-248.108	-217.896	-248.718	-192.566	-209.045	-234.68	-307.922
	132.1	-14.3433	-17.0898	-14.6484	-13.4277	-14.3433	-11.2915	-14.6484	-14.9536	-15.8691	-12.207	-10.6812	-191.345	-191.345	-200.195	-185.852	-252.991	-219.116	-251.465	-196.228	-211.487	-227.966	-312.5
	132.2	-14.6484	-15.2588	-14.6484	-14.3433	-14.6484	-12.207	-15.564	-14.9536	-15.2588	-15.8691	-10.0708	-190.125	-188.904	-204.468	-180.664	-257.874	-216.98	-255.432	-193.787	-216.064	-225.525	-313.416
	132.3	-16.1743	-16.7847	-16.7847	-14.0381	-15.8691	-13.1226	-15.2588	-14.6484	-14.9536	-20.1416	-12.5122	-191.956	-184.021	-207.52	-180.359	-255.127	-215.759	-250.854	-190.43	-218.811	-224.304	-306.702
	132.4	-14.3433	-18.6157	-16.1743	-14.6484	-14.3433	-11.2915	-15.2588	-14.3433	-13.4277	-17.395	-13.1226	-188.599	-184.326	-208.13	-176.392	-249.023	-213.318	-243.225	-187.378	-217.285	-219.421	-301.514
	132.5	-12.8174	-17.0898	-15.2588	-13.7329	-14.6484	-11.5967	-14.0381	-12.8174	-14.0381	-15.564	-10.0708	-184.631	-186.157	-205.078	-172.119	-257.263	-213.013	-239.563	-189.514	-214.233	-212.402	-299.377
	132.6	-15.8691	-16.7847	-14.9536	-14.0381	-14.9536	-10.9863	-14.0381	-12.8174	-14.6484	-14.3433	-10.0708	-187.988	-187.683	-203.552	-171.814	-261.536	-215.454	-234.985	-195.007	-207.825	-206.604	-300.293
	132.7	-19.8364	-14.9536	-12.8174	-14.6484	-14.0381	-11.5967	-16.4795	-13.4277	-14.6484	-14.9536	-11.2915	-193.176	-185.547	-201.416	-173.95	-261.841	-217.896	-235.596	-197.449	-204.468	-207.52	-307.007
	132.8	-17.395	-15.564	-14.3433	-15.2588	-12.8174	-13.7329	-18.9209	-13.7329	-17.0898	-12.5122	-11.2915	-188.904	-188.293	-200.806	-175.476	-259.094	-219.421	-231.323	-192.566	-203.552	-212.097	-309.448
	132.9	-16.4795	-14.9536	-15.2588	-16.4795	-12.5122	-13.7329	-17.395	-12.5122	-17.0898	-14.0381	-12.207	-182.8	-190.125	-200.806	-172.729	-255.737	-220.337	-226.44	-187.988	-202.637	-213.928	-302.124
	133	-13.1226	-15.8691	-14.6484	-14.3433	-11.9019	-12.207	-16.4795	-14.0381	-14.0381	-15.2588	-12.207	-178.528	-189.514	-195.618	-169.983	-251.77	-224.304	-231.934	-188.904	-199.585	-218.506	-296.021
	133.1	-15.8691	-15.564	-16.1743	-12.207	-11.5967	-12.8174	-14.9536	-14.6484	-12.8174	-13.7329	-11.2915	-173.34	-185.852	-198.059	-173.035	-246.887	-224.304	-237.427	-187.378	-205.078	-220.642	-295.715
	133.2	-16.1743	-14.9536	-16.7847	-10.9863	-10.6812	-10.6812	-14.9536	-13.4277	-12.8174	-12.8174	-10.9863	-169.373	-187.073	-203.247	-175.476	-247.498	-223.694	-237.122	-186.462	-212.402	-219.727	-294.8
	133.3	-16.7847	-14.9536	-17.7002	-11.5967	-10.376	-10.0708	-15.564	-14.0381	-14.3433	-11.9019	-11.2915	-167.847	-186.768	-205.078	-177.307	-246.887	-224.609	-230.713	-187.073	-218.811	-219.421	-292.969
	133.4	-13.7329	-14.6484	-16.7847	-11.5967	-12.5122	-13.7329	-14.6484	-10.9863	-14.3433	-11.2915	-10.9863	-167.847	-187.683	-206.299	-177.612	-240.173	-230.408	-229.492	-187.683	-221.863	-220.642	-296.021
	133.5	-13.4277	-14.6484	-16.4795	-11.9019	-14.3433	-11.9019	-15.2588	-9.15527	-14.3433	-12.5122	-10.376	-173.95	-189.514	-204.468	-172.119	-235.291	-231.628	-227.966	-187.073	-219.421	-223.694	-304.565
	133.6	-13.1226	-14.3433	-17.7002	-14.6484	-13.7329	-10.9863	-19.2261	-10.0708	-14.9536	-13.7329	-10.376	-177.612	-191.956	-201.721	-171.509	-236.511	-229.492	-234.07	-183.105	-215.759	-222.473	-314.026
	133.7	-12.5122	-15.564	-18.6157	-12.5122	-11.5967	-12.5122	-14.9536	-13.7329	-12.8174	-14.0381	-10.376	-183.411	-186.157	-204.773	-173.34	-239.258	-227.051	-246.277	-181.274	-212.402	-216.37	-320.129
	133.8	-13.4277	-15.2588	-16.4795	-12.8174	-11.5967	-12.8174	-12.8174	-14.3433	-13.7329	-14.3433	-10.0708	-189.209	-177.307	-206.299	-173.035	-237.122	-230.103	-257.263	-180.969	-216.98	-215.149	-317.383
	133.9	-14.3433	-15.2588	-15.8691	-12.5122	-11.9019	-12.8174	-12.207	-13.4277	-14.3433	-15.2588	-10.376	-181.274	-174.561	-206.909	-174.561	-238.953	-231.323	-258.789	-181.58	-222.778	-220.642	-305.481
	134	-15.8691	-13.1226	-14.3433	-11.9019	-11.9019	-13.7329	-13.4277	-11.5967	-15.2588	-15.2588	-9.76562	-174.561	-170.288	-210.266	-181.274	-241.699	-226.135	-256.348	-180.969	-226.746	-224.304	-293.884
	134.1	-15.8691	-12.207	-14.9536	-11.2915	-11.2915	-13.1226	-13.7329	-11.9019	-16.1743	-16.7847	-9.76562	-176.392	-168.152	-210.266	-182.8	-239.868	-221.558	-250.854	-184.326	-227.356	-226.746	-293.579
	134.2	-13.7329	-13.1226	-16.4795	-15.8691	-10.6812	-13.4277	-15.8691	-14.9536	-15.2588	-15.564	-9.76562	-184.326	-169.983	-204.773	-178.833	-242.615	-221.252	-250.244	-187.073	-224.304	-228.577	-299.683
	134.3	-13.7329	-14.6484	-16.7847	-16.4795	-11.5967	-13.4277	-15.8691	-11.5967	-14.3433	-15.2588	-8.8501	-184.937	-165.1	-198.364	-180.969	-249.634	-222.168	-251.465	-191.65	-222.168	-232.849	-303.04
	134.4	-14.3433	-11.5967	-14.3433	-14.9536	-11.2915	-11.9019	-14.0381	-10.376	-14.9536	-18.9209	-8.54492	-183.716	-163.269	-194.092	-182.19	-256.653	-222.168	-252.991	-194.397	-219.421	-231.628	-299.072
	134.5	-14.0381	-12.207	-14.9536	-11.5967	-11.9019	-12.8174	-14.9536	-14.0381	-15.2588	-16.1743	-10.376	-184.021	-166.016	-193.787	-185.242	-257.874	-222.473	-250.549	-197.144	-217.896	-228.882	-299.377
	134.6	-13.7329	-14.3433	-15.564	-12.8174	-10.376	-10.9863	-14.9536	-12.8174	-17.0898	-12.8174	-10.6812	-186.768	-170.288	-199.28	-187.683	-260.315	-226.135	-245.972	-192.261	-213.013	-229.797	-302.734
	134.7	-13.7329	-14.6484	-14.9536	-12.8174	-10.376	-9.76562	-15.2588	-10.9863	-14.9536	-12.8174	-12.5122	-197.144	-171.814	-204.773	-185.852	-258.789	-227.966	-242.615	-187.683	-208.13	-226.746	-304.871
	134.8	-12.5122	-15.564	-15.8691	-12.207	-12.5122	-11.2915	-14.9536	-12.8174	-13.1226	-13.7329	-9.76562	-202.942	-169.983	-209.961	-188.293	-258.179	-225.525	-243.225	-188.904	-209.045	-227.051	-304.26
	134.9	-12.8174	-14.9536	-16.7847	-11.9019	-13.7329	-13.4277	-13.4277	-14.3433	-12.207	-13.7329	-11.9019	-201.111	-169.067	-213.013	-194.092	-262.756	-221.252	-247.498	-190.735	-208.74	-228.577	-305.786
	135	-13.7329	-13.7329	-15.2588	-10.376	-13.1226	-11.2915	-12.207	-14.0381	-12.207	-14.0381	-14.9536	-197.449	-171.204	-216.675	-198.059	-260.315	-216.675	-248.718	-193.176	-205.383	-224.304	-315.247
	135.1	-13.7329	-14.3433	-14.6484	-10.376	-12.5122	-11.2915	-10.376	-13.7329	-12.8174	-14.6484	-12.8174	-191.345	-170.898	-219.421	-198.364	-257.874	-216.064	-245.972	-190.735	-199.28	-219.116	-321.96
	135.2	-12.8174	-16.4795	-14.9536	-12.207	-11.5967	-11.9019	-12.8174	-11.9019	-12.8174	-14.6484	-9.76562	-184.937	-167.847	-223.389	-201.721	-251.465	-217.896	-239.563	-189.209	-198.059	-216.37	-331.116
	135.3	-14.3433	-16.4795	-16.4795	-12.207	-11.5967	-12.5122	-13.4277	-11.2915	-11.2915	-14.9536	-7.01904	-180.969	-162.354	-225.83	-200.806	-245.361	-219.421	-234.68	-193.787	-201.416	-215.759	-333.862
	135.4	-14.0381	-16.1743	-16.1743	-12.207	-11.5967	-13.4277	-15.564	-11.9019	-14.9536	-19.2261	-8.8501	-175.171	-161.743	-225.22	-202.332	-244.446	-220.337	-233.459	-202.332	-201.111	-214.844	-335.388
	135.5	-15.2588	-16.1743	-17.395	-11.2915	-11.5967	-14.6484	-13.7329	-11.5967	-12.8174	-17.7002	-11.9019	-175.476	-169.067	-224.304	-205.383	-247.498	-224.304	-232.849	-211.487	-196.533	-213.318	-340.271
	135.6	-13.4277	-17.7002	-15.2588	-11.2915	-10.6812	-14.6484	-11.5967	-12.207	-10.0708	-19.2261	-11.9019	-177.307	-170.898	-226.135	-202.942	-247.498	-222.778	-234.375	-212.708	-194.092	-214.233	-350.342
	135.7	-12.207	-17.0898	-14.6484	-11.5967	-11.9019	-13.4277	-11.2915	-12.5122	-11.9019	-22.2778	-10.9863	-176.392	-168.762	-228.577	-199.28	-244.446	-221.252	-235.291	-212.097	-194.397	-217.896	-353.699
	135.8	-13.4277	-16.4795	-14.3433	-10.9863	-11.5967	-13.4277	-10.9863	-9.46045	-14.6484	-22.583	-11.5967	-173.34	-167.847	-221.252	-199.585	-245.361	-219.421	-231.323	-216.37	-198.364	-223.389	-345.459
	135.9	-15.8691	-16.4795	-16.1743	-11.9019	-10.9863	-11.5967	-11.2915	-11.5967	-16.1743	-21.3623	-10.6812	-171.814	-169.983	-216.675	-199.585	-251.465	-221.252	-227.051	-213.928	-196.533	-227.661	-340.881
	136	-14.3433	-16.7847	-14.3433	-13.4277	-10.376	-11.2915	-14.3433	-10.376	-17.0898	-19.5312	-10.376	-177.612	-172.119	-219.727	-195.923	-260.315	-223.083	-227.661	-208.435	-196.533	-225.22	-338.745
	136.1	-10.6812	-15.2588	-13.7329	-10.9863	-12.5122	-11.5967	-14.9536	-9.76562	-15.2588	-21.6675	-11.5967	-187.378	-172.424	-220.337	-199.28	-267.029	-220.642	-228.882	-209.656	-201.111	-226.44	-339.355
	136.2	-13.7329	-14.0381	-14.0381	-13.1226	-12.8174	-10.9863	-14.6484	-10.376	-12.8174	-21.0571	-11.5967	-191.65	-176.086	-219.727	-207.52	-268.86	-216.064	-231.018	-211.182	-204.468	-230.103	-340.271
	136.3	-13.4277	-15.2588	-12.8174	-10.9863	-11.9019	-11.9019	-14.6484	-11.2915	-10.9863	-20.4468	-10.376	-189.514	-180.359	-220.642	-206.909	-268.555	-213.013	-233.459	-207.52	-204.163	-232.239	-340.271
	136.4	-15.8691	-16.4795	-13.1226	-11.5967	-12.207	-12.207	-14.6484	-12.5122	-13.4277	-19.2261	-10.9863	-185.547	-182.495	-225.22	-206.604	-267.639	-207.825	-242.31	-203.247	-202.942	-230.713	-339.355
	136.5	-17.395	-16.4795	-12.5122	-11.9019	-12.5122	-10.6812	-15.564	-12.207	-13.7329	-19.8364	-11.5967	-183.105	-181.274	-229.797	-208.13	-260.925	-213.623	-248.718	-201.721	-203.247	-227.661	-338.745
	136.6	-18.6157	-14.6484	-14.6484	-13.4277	-11.9019	-11.5967	-15.8691	-11.5967	-13.4277	-18.9209	-11.5967	-180.969	-183.716	-233.765	-206.299	-255.432	-223.999	-247.192	-199.28	-202.942	-223.083	-340.881
	136.7	-16.1743	-13.7329	-14.3433	-13.7329	-10.376	-10.0708	-14.9536	-10.0708	-13.7329	-16.7847	-11.5967	-175.171	-180.664	-232.239	-207.214	-256.042	-228.271	-247.803	-199.89	-201.416	-221.252	-341.492
	136.8	-13.4277	-13.4277	-13.4277	-11.2915	-10.9863	-11.5967	-14.6484	-10.9863	-12.8174	-16.7847	-12.207	-171.204	-178.833	-231.018	-205.688	-254.822	-224.915	-253.296	-200.806	-200.806	-219.116	-346.069
	136.9	-13.1226	-14.9536	-14.0381	-8.54492	-12.207	-11.2915	-15.2588	-10.376	-13.7329	-16.4795	-11.9019	-169.067	-176.697	-234.985	-198.364	-252.38	-220.032	-257.568	-195.007	-200.806	-219.421	-349.426
	137	-13.4277	-15.8691	-13.1226	-7.93457	-12.5122	-12.5122	-14.6484	-10.9863	-13.7329	-15.2588	-12.207	-164.49	-175.476	-242.31	-199.28	-251.465	-213.623	-252.991	-191.956	-200.5	-218.506	-340.881
	137.1	-12.5122	-16.7847	-14.9536	-8.54492	-14.0381	-12.5122	-13.4277	-12.207	-12.8174	-14.6484	-12.8174	-162.354	-173.035	-245.056	-205.994	-259.094	-213.928	-250.854	-193.787	-202.942	-216.98	-336.304
	137.2	-12.8174	-14.9536	-15.2588	-9.46045	-12.5122	-12.207	-13.4277	-14.0381	-14.6484	-13.1226	-12.5122	-163.574	-173.95	-244.446	-213.623	-270.691	-214.844	-254.822	-199.28	-205.078	-218.506	-330.505
	137.3	-14.3433	-14.6484	-13.4277	-9.76562	-12.5122	-11.5967	-14.0381	-12.207	-14.6484	-10.0708	-13.1226	-164.49	-173.035	-250.854	-207.214	-276.489	-220.032	-256.653	-209.961	-203.552	-222.168	-325.012
	137.4	-14.6484	-14.6484	-11.9019	-9.15527	-10.376	-11.2915	-15.2588	-10.9863	-12.5122	-9.76562	-11.9019	-162.048	-174.866	-253.601	-204.468	-277.71	-222.778	-257.568	-217.59	-201.111	-223.694	-323.181
	137.5	-13.4277	-13.7329	-12.5122	-9.76562	-10.376	-14.0381	-14.3433	-10.0708	-13.4277	-10.9863	-10.6812	-163.574	-177.002	-244.751	-205.688	-278.931	-222.168	-255.737	-214.539	-204.163	-221.558	-327.148
	137.6	-13.4277	-12.5122	-14.9536	-9.76562	-12.207	-12.5122	-13.7329	-12.207	-12.8174	-10.9863	-11.9019	-170.593	-180.969	-235.901	-206.909	-279.236	-221.558	-249.329	-209.656	-204.163	-219.421	-330.811
	137.7	-14.0381	-14.0381	-14.6484	-10.9863	-12.8174	-12.207	-14.3433	-14.6484	-12.207	-11.5967	-11.5967	-171.204	-181.274	-234.985	-202.332	-278.625	-214.844	-242.92	-206.909	-206.299	-222.168	-335.999
	137.8	-14.6484	-16.4795	-14.6484	-12.5122	-11.2915	-13.4277	-14.3433	-14.9536	-13.7329	-12.5122	-11.2915	-170.593	-181.885	-234.68	-197.754	-277.71	-209.351	-238.342	-207.52	-209.656	-225.83	-342.102
	137.9	-16.7847	-12.5122	-12.8174	-13.7329	-10.9863	-11.9019	-14.9536	-14.6484	-13.7329	-13.4277	-10.6812	-173.34	-181.274	-236.511	-194.702	-273.743	-208.13	-236.206	-204.163	-213.623	-226.746	-343.933
	138	-14.6484	-10.0708	-12.207	-13.4277	-9.76562	-10.9863	-15.8691	-14.0381	-11.9019	-12.8174	-9.15527	-172.729	-179.443	-238.342	-194.702	-271.301	-208.435	-238.037	-207.52	-215.759	-228.577	-334.473
	138.1	-11.9019	-9.76562	-13.7329	-12.8174	-9.46045	-12.207	-14.0381	-12.5122	-11.5967	-12.207	-9.76562	-172.119	-181.274	-237.427	-194.092	-270.081	-202.637	-236.206	-213.623	-216.98	-229.187	-333.557
	138.2	-12.5122	-10.6812	-14.6484	-13.4277	-12.207	-13.4277	-13.7329	-12.5122	-12.8174	-10.376	-11.2915	-171.814	-177.307	-235.291	-192.566	-270.386	-200.806	-238.037	-214.539	-214.844	-228.882	-341.797
	138.3	-13.4277	-11.5967	-14.3433	-11.9019	-11.5967	-12.8174	-13.4277	-10.9863	-11.5967	-10.6812	-9.15527	-168.457	-174.561	-231.628	-192.566	-270.386	-201.111	-242.92	-211.487	-213.318	-232.544	-341.492
	138.4	-14.0381	-12.5122	-16.1743	-10.0708	-12.207	-12.5122	-12.207	-11.5967	-12.8174	-13.1226	-11.5967	-166.931	-176.697	-231.018	-187.378	-267.639	-202.332	-241.089	-209.656	-220.642	-234.07	-333.252
	138.5	-15.8691	-12.8174	-14.3433	-10.6812	-10.376	-10.9863	-12.8174	-11.2915	-14.3433	-13.4277	-12.5122	-170.288	-177.307	-228.577	-186.157	-268.86	-208.13	-240.784	-210.571	-226.135	-232.239	-321.35
	138.6	-13.1226	-12.5122	-14.3433	-11.5967	-9.46045	-9.46045	-13.4277	-13.4277	-15.564	-11.5967	-13.1226	-177.917	-174.255	-228.577	-184.326	-267.944	-213.928	-242.004	-209.656	-225.525	-230.408	-315.247
	138.7	-12.8174	-11.9019	-16.1743	-10.9863	-11.9019	-11.2915	-13.7329	-11.9019	-14.6484	-11.9019	-11.2915	-182.19	-173.34	-233.765	-182.8	-263.062	-216.675	-243.835	-206.299	-226.44	-233.154	-318.909
	138.8	-12.207	-12.207	-13.7329	-11.9019	-13.1226	-10.376	-14.0381	-9.46045	-12.8174	-10.9863	-8.8501	-183.411	-176.392	-239.258	-184.631	-273.132	-216.064	-245.056	-200.5	-225.525	-236.206	-327.454
	138.9	-11.9019	-13.1226	-12.5122	-12.8174	-12.207	-10.376	-13.7329	-10.376	-12.5122	-13.7329	-11.2915	-181.274	-177.002	-244.141	-188.293	-286.255	-216.064	-250.244	-199.89	-222.168	-241.699	-334.167
	139	-13.1226	-14.9536	-12.8174	-13.4277	-11.2915	-11.9019	-11.5967	-11.9019	-13.4277	-12.207	-11.9019	-179.443	-184.326	-244.446	-186.157	-288.696	-214.844	-252.38	-199.585	-223.694	-242.004	-329.59
	139.1	-12.8174	-13.4277	-12.207	-12.5122	-9.76562	-10.376	-11.2915	-12.5122	-12.207	-11.2915	-11.9019	-178.833	-183.716	-241.699	-184.631	-281.677	-209.656	-251.77	-198.975	-227.356	-237.427	-322.876
	139.2	-12.5122	-13.7329	-12.207	-12.207	-10.376	-10.9863	-11.9019	-12.5122	-12.207	-12.207	-10.0708	-175.781	-179.443	-237.732	-187.073	-273.132	-209.045	-246.277	-202.332	-228.271	-240.784	-318.298
	139.3	-13.7329	-14.0381	-13.7329	-13.4277	-10.376	-12.207	-11.9019	-10.6812	-13.4277	-11.9019	-10.376	-171.509	-177.307	-231.628	-188.599	-266.724	-209.961	-237.427	-209.351	-228.882	-241.699	-314.941
	139.4	-14.3433	-15.564	-13.4277	-14.3433	-9.46045	-11.9019	-12.8174	-11.9019	-14.0381	-12.8174	-9.76562	-168.457	-176.697	-227.661	-188.904	-265.503	-213.318	-235.596	-216.064	-226.746	-236.816	-307.922
	139.5	-14.0381	-15.564	-14.0381	-12.8174	-11.2915	-12.5122	-13.7329	-14.0381	-13.1226	-14.6484	-9.76562	-170.288	-175.476	-226.135	-184.631	-267.334	-215.454	-235.596	-219.116	-227.356	-233.459	-311.279
	139.6	-13.7329	-14.9536	-15.8691	-12.207	-12.8174	-11.5967	-12.8174	-12.207	-12.5122	-14.9536	-11.2915	-173.035	-176.392	-222.778	-179.443	-267.029	-218.506	-233.154	-219.421	-223.999	-232.544	-320.129
	139.7	-14.3433	-13.7329	-16.7847	-12.5122	-14.6484	-11.2915	-12.8174	-12.5122	-13.7329	-14.6484	-10.6812	-177.307	-172.119	-218.201	-177.612	-265.198	-217.896	-233.765	-216.675	-219.727	-226.746	-323.792
	139.8	-11.9019	-12.207	-15.564	-11.5967	-13.1226	-12.5122	-14.0381	-14.0381	-13.4277	-17.0898	-10.6812	-180.359	-168.762	-218.506	-175.476	-268.86	-216.98	-242.615	-213.623	-222.473	-226.746	-325.012
	139.9	-12.207	-12.207	-16.1743	-12.207	-10.6812	-13.4277	-12.8174	-15.2588	-13.4277	-13.7329	-10.9863	-182.19	-170.898	-220.032	-173.035	-274.658	-216.064	-248.108	-210.876	-223.083	-228.271	-328.979
	140	-16.4795	-13.4277	-14.9536	-11.2915	-10.376	-11.5967	-11.2915	-15.8691	-13.4277	-13.4277	-9.15527	-183.411	-168.762	-217.285	-173.95	-278.32	-218.506	-243.835	-209.351	-217.896	-230.713	-334.473
	140.1	-16.1743	-14.9536	-13.4277	-12.207	-10.376	-10.376	-12.8174	-14.9536	-10.6812	-12.8174	-9.76562	-177.917	-169.373	-213.318	-178.223	-279.236	-221.252	-235.596	-213.013	-213.928	-232.239	-331.726
	140.2	-15.2588	-14.9536	-14.9536	-10.9863	-11.2915	-9.76562	-11.5967	-14.9536	-11.9019	-14.9536	-9.46045	-175.781	-169.373	-211.487	-178.528	-278.015	-220.032	-234.375	-216.37	-210.571	-237.732	-318.909
	140.3	-14.6484	-13.1226	-15.8691	-11.9019	-10.9863	-10.6812	-10.6812	-14.0381	-10.376	-17.0898	-10.376	-172.119	-164.795	-215.454	-182.19	-271.301	-223.389	-234.68	-217.285	-207.214	-242.31	-310.059
	140.4	-13.7329	-13.4277	-14.9536	-12.8174	-10.9863	-10.6812	-12.5122	-13.1226	-11.5967	-16.1743	-10.9863	-170.593	-166.626	-221.558	-181.58	-266.418	-231.323	-237.732	-213.623	-209.045	-242.004	-302.124
	140.5	-14.3433	-11.2915	-15.8691	-12.8174	-11.5967	-10.9863	-14.6484	-12.207	-11.9019	-14.0381	-10.6812	-171.509	-167.847	-221.863	-187.378	-260.315	-235.596	-240.173	-211.182	-209.656	-238.953	-297.241
	140.6	-15.2588	-11.2915	-16.1743	-11.2915	-12.8174	-9.76562	-14.9536	-14.3433	-12.8174	-11.9019	-9.46045	-173.645	-166.931	-216.37	-193.481	-260.01	-237.427	-247.192	-210.266	-206.299	-232.239	-294.495
	140.7	-13.1226	-14.0381	-16.1743	-11.2915	-11.9019	-10.9863	-15.564	-15.2588	-13.4277	-13.7329	-9.15527	-176.086	-167.847	-213.623	-198.364	-263.977	-234.375	-245.667	-208.74	-205.078	-229.492	-290.222
	140.8	-12.5122	-11.5967	-16.4795	-12.207	-12.207	-11.9019	-11.9019	-13.4277	-11.9019	-14.6484	-11.5967	-179.749	-168.152	-215.759	-202.332	-257.874	-231.323	-235.901	-208.74	-204.468	-233.154	-290.222
	140.9	-11.5967	-11.5967	-14.6484	-13.4277	-11.2915	-10.6812	-11.2915	-13.4277	-10.0708	-14.6484	-10.9863	-178.528	-169.983	-215.759	-199.89	-251.465	-231.323	-231.934	-207.52	-206.299	-240.784	-296.631
	141	-13.1226	-14.0381	-15.2588	-12.5122	-11.9019	-11.5967	-12.5122	-12.5122	-11.9019	-16.1743	-10.376	-176.086	-171.509	-211.182	-196.533	-250.549	-235.901	-237.732	-203.857	-211.182	-243.53	-297.546
	141.1	-11.9019	-13.4277	-17.395	-12.5122	-14.6484	-11.9019	-10.9863	-13.4277	-10.9863	-17.0898	-10.6812	-174.561	-169.373	-207.825	-194.397	-253.601	-238.342	-245.972	-203.247	-209.045	-245.667	-293.274
	141.2	-11.9019	-12.5122	-18.6157	-10.9863	-14.0381	-12.8174	-11.5967	-14.6484	-10.9863	-16.7847	-10.6812	-173.035	-164.795	-213.013	-191.04	-256.653	-237.732	-248.718	-206.299	-204.773	-240.173	-289.001
	141.3	-13.4277	-14.6484	-16.7847	-10.9863	-12.207	-12.5122	-12.8174	-12.8174	-11.2915	-16.4795	-10.0708	-169.067	-163.574	-220.032	-188.599	-264.893	-239.563	-243.53	-207.52	-208.13	-234.985	-287.476
	141.4	-15.8691	-12.207	-14.6484	-13.1226	-11.5967	-10.9863	-14.0381	-10.6812	-10.6812	-17.0898	-9.46045	-166.626	-166.626	-218.506	-186.462	-268.86	-240.784	-240.784	-208.435	-212.402	-232.544	-288.391
	141.5	-14.3433	-10.0708	-12.5122	-12.207	-12.8174	-10.6812	-13.7329	-13.7329	-9.15527	-17.0898	-9.46045	-169.678	-169.678	-216.064	-191.345	-275.879	-241.089	-245.361	-213.013	-217.896	-229.492	-289.612
	141.6	-11.9019	-10.376	-12.207	-14.0381	-11.9019	-12.8174	-13.1226	-12.5122	-10.9863	-16.4795	-10.6812	-172.424	-168.152	-222.778	-194.092	-279.236	-241.394	-249.329	-216.064	-220.642	-231.934	-285.034
	141.7	-14.9536	-11.9019	-13.7329	-11.5967	-13.1226	-14.0381	-10.9863	-11.5967	-12.8174	-15.564	-10.9863	-172.119	-164.795	-233.459	-200.195	-277.405	-242.92	-246.277	-211.792	-218.201	-237.732	-279.846
	141.8	-16.4795	-13.4277	-14.0381	-13.1226	-10.376	-11.5967	-10.9863	-13.4277	-11.5967	-16.1743	-10.0708	-171.509	-165.1	-238.953	-201.721	-274.963	-238.342	-238.342	-207.214	-217.285	-237.732	-278.625
	141.9	-15.8691	-12.5122	-15.2588	-12.5122	-10.0708	-13.1226	-11.9019	-12.207	-13.1226	-15.8691	-11.5967	-168.457	-168.762	-237.427	-197.754	-273.743	-229.797	-232.849	-206.909	-214.539	-234.375	-277.71
	142	-14.0381	-11.9019	-11.5967	-14.0381	-9.76562	-13.7329	-14.6484	-10.376	-14.9536	-15.2588	-13.4277	-167.236	-169.067	-234.07	-197.144	-271.301	-224.304	-227.356	-209.656	-207.825	-228.271	-277.405
	142.1	-11.9019	-11.5967	-10.6812	-15.2588	-10.9863	-13.7329	-14.0381	-12.207	-13.4277	-13.7329	-13.4277	-170.593	-167.236	-231.018	-197.754	-272.217	-225.83	-228.271	-212.097	-205.078	-229.492	-277.405
	142.2	-11.5967	-12.207	-11.9019	-14.9536	-11.2915	-14.6484	-11.9019	-11.9019	-12.207	-13.4277	-11.5967	-173.95	-168.457	-236.206	-198.669	-270.386	-234.07	-234.375	-208.435	-206.909	-237.732	-281.067
	142.3	-13.4277	-11.2915	-12.207	-13.4277	-12.5122	-15.564	-10.9863	-10.6812	-10.376	-13.1226	-11.9019	-173.035	-169.983	-240.173	-199.89	-270.081	-235.901	-237.427	-207.52	-207.52	-241.089	-282.288
	142.4	-12.5122	-11.5967	-11.5967	-12.207	-12.207	-12.8174	-11.5967	-11.9019	-12.8174	-14.9536	-13.7329	-172.424	-171.204	-242.615	-201.111	-274.658	-231.018	-240.784	-209.656	-205.383	-243.53	-278.625
	142.5	-11.5967	-10.6812	-12.8174	-11.9019	-12.8174	-10.376	-12.207	-12.8174	-13.4277	-14.0381	-14.9536	-169.067	-171.814	-241.699	-199.28	-273.743	-227.356	-248.108	-209.045	-205.994	-245.056	-276.489
	142.6	-13.7329	-10.9863	-13.7329	-11.5967	-12.207	-10.0708	-11.5967	-11.9019	-14.3433	-13.1226	-11.9019	-169.373	-170.593	-238.342	-195.007	-266.418	-222.168	-245.972	-209.656	-201.111	-244.141	-278.931
	142.7	-13.7329	-13.7329	-13.7329	-12.207	-10.9863	-12.207	-10.9863	-11.9019	-12.8174	-12.8174	-9.46045	-172.729	-170.898	-246.277	-188.904	-257.263	-220.642	-240.173	-209.351	-198.364	-244.141	-281.067
	142.8	-12.5122	-14.3433	-13.7329	-11.9019	-11.9019	-12.8174	-11.2915	-10.9863	-13.1226	-14.9536	-9.46045	-174.561	-169.067	-257.568	-186.768	-254.211	-222.168	-240.479	-203.857	-200.195	-241.394	-278.32
	142.9	-11.5967	-12.207	-13.7329	-12.207	-11.9019	-11.5967	-12.5122	-11.2915	-14.0381	-17.7002	-10.376	-179.749	-169.983	-260.315	-187.683	-255.432	-223.694	-243.225	-195.618	-201.721	-231.934	-284.729
	143	-11.2915	-10.6812	-14.0381	-13.1226	-11.5967	-12.5122	-14.6484	-12.5122	-14.6484	-17.0898	-12.207	-184.021	-171.204	-256.958	-185.242	-261.23	-218.811	-247.498	-194.397	-210.571	-229.492	-295.715
	143.1	-12.5122	-11.5967	-15.2588	-12.5122	-10.376	-12.5122	-13.4277	-13.4277	-14.9536	-17.0898	-12.207	-185.852	-176.392	-247.192	-184.021	-267.029	-216.675	-251.16	-198.975	-218.811	-235.291	-304.26
	143.2	-14.6484	-10.376	-14.6484	-12.5122	-10.0708	-12.8174	-13.1226	-14.0381	-14.6484	-17.0898	-10.376	-186.768	-181.274	-238.342	-178.833	-265.808	-216.98	-251.16	-203.552	-217.59	-236.816	-305.481
	143.3	-15.2588	-12.207	-14.9536	-12.207	-9.76562	-11.9019	-14.6484	-12.5122	-14.6484	-15.564	-8.8501	-186.157	-180.969	-235.596	-176.086	-268.555	-213.318	-256.348	-205.078	-214.844	-235.596	-307.007
	143.4	-11.9019	-11.5967	-15.2588	-13.4277	-11.2915	-13.1226	-14.6484	-11.5967	-16.4795	-13.4277	-11.5967	-190.125	-180.054	-243.835	-178.833	-265.808	-214.844	-257.568	-202.942	-218.201	-232.544	-306.396
	143.5	-11.5967	-10.376	-13.7329	-11.5967	-11.2915	-13.7329	-11.5967	-12.207	-16.4795	-14.0381	-12.5122	-190.125	-178.528	-250.854	-182.495	-261.536	-226.746	-254.822	-205.078	-222.168	-226.135	-302.734
	143.6	-12.207	-12.207	-12.207	-9.15527	-10.376	-14.9536	-11.9019	-12.5122	-13.7329	-14.6484	-11.5967	-185.242	-177.002	-245.972	-181.274	-263.367	-239.868	-253.296	-210.876	-226.44	-224.304	-297.241
	143.7	-13.1226	-14.3433	-12.5122	-9.15527	-12.207	-13.1226	-12.207	-13.4277	-12.207	-15.2588	-10.6812	-185.242	-178.833	-238.342	-182.19	-261.23	-242.92	-253.296	-218.811	-225.22	-227.661	-293.884
	143.8	-13.1226	-13.4277	-14.9536	-11.5967	-13.4277	-12.207	-12.5122	-12.8174	-11.9019	-17.395	-10.0708	-186.462	-179.138	-228.882	-183.411	-257.568	-241.089	-250.854	-219.421	-218.201	-231.323	-290.833
	143.9	-12.8174	-13.4277	-14.6484	-12.5122	-10.9863	-11.2915	-13.1226	-13.7329	-14.6484	-16.7847	-11.2915	-179.443	-176.392	-220.947	-183.105	-257.263	-237.427	-242.615	-220.337	-214.539	-230.103	-287.781
	144	-13.4277	-13.1226	-10.6812	-12.207	-9.76562	-10.0708	-14.0381	-13.1226	-15.2588	-17.395	-11.5967	-169.373	-173.645	-221.558	-186.462	-258.484	-233.459	-236.816	-220.032	-213.928	-228.882	-291.748
	144.1	-11.2915	-11.2915	-11.2915	-11.5967	-12.207	-11.5967	-14.9536	-12.207	-12.8174	-17.0898	-10.376	-168.457	-169.373	-226.44	-186.157	-266.724	-230.713	-235.291	-216.064	-213.928	-228.271	-297.546
	144.2	-10.6812	-11.9019	-11.9019	-14.0381	-11.9019	-11.2915	-15.8691	-11.5967	-11.5967	-17.7002	-9.46045	-169.373	-166.321	-225.525	-184.021	-272.217	-231.628	-232.544	-211.487	-212.402	-229.187	-302.429
	144.3	-12.5122	-9.76562	-12.8174	-14.6484	-12.207	-12.5122	-15.2588	-12.5122	-13.4277	-15.8691	-11.9019	-168.152	-162.659	-225.83	-184.631	-270.691	-232.544	-227.966	-206.604	-212.097	-229.492	-307.617
	144.4	-13.4277	-10.376	-13.4277	-13.7329	-12.207	-12.8174	-14.6484	-14.6484	-14.3433	-14.9536	-11.2915	-165.1	-162.659	-227.051	-190.125	-264.587	-235.901	-227.051	-206.299	-214.233	-234.985	-307.922
	144.5	-14.0381	-11.2915	-13.4277	-12.5122	-11.5967	-14.9536	-13.4277	-14.9536	-13.1226	-14.0381	-12.5122	-166.931	-167.847	-226.135	-194.702	-261.23	-239.258	-229.187	-211.487	-217.896	-234.375	-305.786
	144.6	-13.1226	-10.9863	-14.6484	-14.0381	-12.5122	-13.4277	-14.3433	-14.0381	-13.4277	-16.4795	-12.5122	-172.729	-170.288	-225.525	-191.345	-259.094	-237.122	-230.408	-214.233	-215.759	-226.746	-304.565
	144.7	-12.5122	-10.0708	-12.5122	-14.3433	-13.4277	-11.5967	-15.8691	-11.2915	-13.7329	-16.4795	-11.2915	-181.885	-166.321	-226.135	-185.852	-265.503	-235.901	-225.22	-214.539	-215.454	-222.778	-307.007
	144.8	-9.76562	-11.5967	-12.5122	-14.0381	-13.4277	-12.207	-15.2588	-12.5122	-14.6484	-13.7329	-12.5122	-186.157	-162.659	-229.187	-184.021	-274.353	-235.596	-219.421	-216.675	-215.759	-218.201	-312.805
	144.9	-10.9863	-11.5967	-14.3433	-13.1226	-13.7329	-14.6484	-13.7329	-11.2915	-13.7329	-15.564	-11.2915	-185.852	-165.1	-231.628	-187.683	-277.1	-231.628	-219.727	-214.539	-211.792	-216.675	-312.5
	145	-12.207	-10.6812	-14.6484	-11.9019	-16.4795	-15.8691	-12.8174	-11.2915	-12.207	-17.395	-12.5122	-185.852	-167.542	-230.408	-185.852	-277.71	-228.577	-221.863	-214.539	-208.13	-220.337	-302.429
	145.1	-11.2915	-14.0381	-14.9536	-13.7329	-16.7847	-11.5967	-14.6484	-10.9863	-11.5967	-20.4468	-12.8174	-187.378	-166.931	-231.934	-183.716	-274.658	-226.746	-225.525	-216.064	-205.688	-227.661	-298.157
	145.2	-9.76562	-14.9536	-14.3433	-14.9536	-15.564	-11.9019	-13.1226	-9.76562	-12.8174	-17.0898	-15.2588	-188.599	-163.879	-236.206	-183.716	-269.47	-226.135	-229.492	-211.792	-203.552	-234.985	-301.819
	145.3	-10.6812	-14.3433	-11.9019	-14.6484	-14.0381	-10.9863	-12.5122	-10.6812	-12.8174	-16.1743	-14.6484	-179.138	-163.879	-234.985	-185.242	-263.062	-225.525	-232.849	-209.351	-205.688	-243.53	-303.65
	145.4	-11.9019	-13.1226	-11.9019	-14.6484	-14.0381	-12.207	-14.3433	-14.3433	-13.7329	-13.4277	-12.8174	-172.424	-168.762	-226.44	-186.768	-259.094	-225.83	-236.816	-208.13	-205.688	-246.887	-301.514
	145.5	-11.2915	-10.6812	-11.5967	-15.8691	-14.6484	-13.1226	-14.6484	-11.5967	-12.8174	-14.9536	-14.3433	-173.645	-169.983	-218.506	-193.481	-256.348	-228.271	-236.511	-205.994	-201.111	-243.835	-295.105
	145.6	-9.46045	-9.76562	-10.9863	-15.8691	-16.4795	-12.8174	-14.9536	-9.46045	-11.2915	-16.4795	-14.3433	-172.119	-168.152	-220.337	-195.007	-258.484	-226.44	-231.018	-204.773	-203.552	-242.615	-293.579
	145.7	-12.5122	-11.5967	-11.9019	-14.0381	-16.7847	-12.207	-14.3433	-10.376	-11.5967	-14.3433	-14.9536	-165.1	-165.1	-222.778	-194.702	-254.822	-227.051	-223.999	-202.637	-209.045	-238.953	-295.41
	145.8	-13.4277	-11.2915	-13.7329	-13.1226	-15.2588	-11.9019	-14.9536	-13.4277	-12.8174	-14.6484	-14.6484	-161.133	-168.457	-216.675	-194.397	-251.16	-230.103	-228.577	-196.838	-213.928	-239.563	-296.631
	145.9	-14.0381	-12.8174	-13.7329	-13.7329	-13.7329	-10.9863	-16.1743	-11.5967	-14.0381	-14.6484	-14.6484	-162.048	-175.171	-212.097	-188.293	-256.042	-231.628	-238.037	-195.923	-215.454	-238.342	-294.189
	146	-13.1226	-11.2915	-11.5967	-14.9536	-13.7329	-12.207	-19.8364	-11.9019	-14.0381	-14.0381	-13.4277	-169.373	-180.054	-213.623	-184.326	-260.925	-232.544	-246.277	-195.618	-212.402	-241.699	-295.41
	146.1	-13.7329	-8.54492	-12.5122	-15.2588	-14.9536	-12.207	-16.7847	-11.5967	-12.5122	-13.7329	-14.3433	-173.035	-173.645	-214.844	-182.19	-262.756	-232.239	-245.972	-199.28	-208.13	-238.953	-303.65
	146.2	-12.8174	-9.46045	-11.5967	-13.7329	-14.9536	-11.9019	-16.7847	-11.5967	-11.2915	-12.5122	-11.5967	-172.424	-168.152	-212.708	-188.904	-265.808	-231.628	-243.835	-207.214	-204.468	-237.732	-314.026
	146.3	-12.5122	-10.9863	-12.5122	-11.9019	-14.3433	-11.9019	-16.1743	-10.0708	-10.376	-13.4277	-14.0381	-176.086	-168.762	-213.318	-196.228	-263.672	-232.239	-246.887	-215.759	-202.942	-237.732	-316.772
	146.4	-9.76562	-13.4277	-13.7329	-11.5967	-14.0381	-10.0708	-14.9536	-11.2915	-10.6812	-13.4277	-13.7329	-181.885	-172.424	-215.759	-198.364	-256.042	-230.713	-245.667	-217.896	-205.078	-234.375	-311.89
	146.5	-8.54492	-13.4277	-14.0381	-10.376	-14.3433	-11.2915	-14.6484	-13.4277	-11.2915	-14.9536	-11.9019	-187.683	-176.086	-219.116	-198.364	-254.822	-228.882	-238.342	-214.233	-212.402	-231.628	-306.702
	146.6	-10.376	-12.5122	-13.7329	-11.5967	-15.2588	-11.9019	-14.6484	-12.8174	-12.8174	-13.1226	-11.9019	-187.073	-176.392	-217.285	-197.144	-256.042	-226.135	-235.291	-205.078	-216.37	-231.628	-307.312
	146.7	-11.5967	-11.9019	-12.207	-14.3433	-13.7329	-10.9863	-15.8691	-11.9019	-12.8174	-13.7329	-11.9019	-184.021	-175.476	-215.149	-193.787	-249.939	-226.746	-235.901	-194.092	-213.623	-236.816	-313.721
	146.8	-10.376	-12.5122	-13.1226	-16.1743	-14.3433	-9.76562	-17.0898	-11.2915	-12.207	-16.4795	-11.5967	-186.768	-172.729	-214.233	-194.092	-246.887	-227.661	-242.004	-191.65	-212.402	-236.816	-314.026
	146.9	-9.76562	-10.6812	-14.6484	-16.4795	-14.0381	-11.9019	-17.7002	-12.207	-11.9019	-17.395	-13.1226	-189.514	-176.697	-219.116	-199.28	-250.854	-227.661	-245.667	-193.787	-216.064	-236.206	-306.702
	147	-9.15527	-10.6812	-13.7329	-13.1226	-13.1226	-12.207	-16.1743	-13.4277	-10.9863	-16.7847	-13.4277	-185.242	-177.612	-220.947	-204.163	-254.822	-230.713	-240.479	-196.533	-218.201	-227.966	-302.124
	147.1	-10.6812	-10.376	-16.4795	-10.9863	-12.8174	-14.0381	-13.4277	-17.0898	-11.5967	-14.9536	-12.5122	-176.392	-177.002	-216.064	-205.994	-257.568	-229.492	-235.901	-195.618	-218.201	-222.778	-301.514
	147.2	-11.9019	-12.207	-16.7847	-10.9863	-13.1226	-14.0381	-15.564	-14.9536	-12.5122	-12.8174	-13.4277	-171.509	-177.612	-216.675	-208.435	-259.399	-230.103	-234.375	-197.449	-220.642	-227.051	-303.65
	147.3	-10.376	-11.5967	-16.7847	-12.8174	-14.3433	-10.9863	-15.564	-14.3433	-12.207	-12.5122	-13.1226	-168.457	-181.274	-214.233	-209.045	-260.62	-235.291	-231.628	-199.28	-220.642	-230.713	-307.312
	147.4	-12.5122	-11.9019	-16.7847	-12.8174	-15.2588	-11.9019	-17.0898	-14.0381	-12.5122	-14.6484	-11.5967	-163.879	-182.8	-207.52	-208.74	-260.315	-238.342	-229.797	-201.721	-216.064	-232.239	-310.974
	147.5	-12.207	-12.8174	-14.9536	-11.9019	-13.4277	-15.2588	-16.1743	-12.5122	-12.207	-13.7329	-10.0708	-165.1	-183.411	-206.299	-206.604	-261.841	-240.784	-231.323	-200.195	-209.656	-239.563	-319.214
	147.6	-10.376	-11.5967	-16.1743	-10.6812	-12.5122	-13.4277	-15.2588	-12.207	-11.5967	-14.9536	-11.5967	-163.879	-184.631	-205.078	-205.994	-260.01	-238.037	-242.615	-193.481	-207.825	-242.615	-320.435
	147.7	-10.9863	-11.9019	-17.395	-9.46045	-13.4277	-10.6812	-15.564	-14.3433	-10.376	-15.8691	-12.207	-160.217	-184.021	-204.163	-205.078	-256.348	-239.563	-250.549	-186.768	-209.961	-240.479	-315.552
	147.8	-9.15527	-13.1226	-20.1416	-10.6812	-12.207	-11.9019	-14.3433	-13.4277	-11.2915	-13.4277	-11.2915	-163.269	-190.43	-202.637	-207.825	-254.211	-248.108	-246.582	-182.495	-209.961	-236.816	-309.448
	147.9	-9.76562	-12.8174	-16.4795	-11.5967	-12.5122	-11.2915	-13.4277	-14.3433	-9.15527	-13.4277	-10.376	-170.898	-192.261	-200.195	-213.928	-252.075	-248.718	-242.615	-187.073	-210.876	-231.628	-310.364
	148	-11.2915	-11.5967	-14.0381	-11.5967	-11.5967	-13.7329	-13.4277	-16.4795	-10.9863	-14.6484	-10.0708	-172.119	-191.345	-208.435	-214.539	-253.601	-243.53	-247.192	-188.293	-208.13	-235.291	-311.89
	148.1	-10.6812	-11.5967	-15.8691	-12.5122	-11.5967	-11.5967	-13.4277	-14.3433	-12.5122	-13.1226	-11.9019	-170.898	-191.956	-220.032	-212.097	-257.874	-238.953	-252.38	-183.411	-207.52	-234.07	-311.584
	148.2	-10.376	-10.6812	-18.0054	-14.6484	-11.9019	-10.6812	-14.6484	-16.4795	-13.1226	-14.0381	-12.8174	-170.288	-192.261	-226.746	-205.688	-268.25	-232.544	-254.822	-176.697	-204.773	-237.122	-315.247
	148.3	-10.9863	-9.46045	-17.395	-14.6484	-14.3433	-12.207	-14.9536	-19.2261	-11.5967	-17.395	-12.8174	-174.255	-188.293	-225.22	-197.144	-272.827	-227.051	-252.38	-176.392	-208.13	-242.92	-317.688
	148.4	-8.8501	-10.9863	-19.5312	-14.0381	-14.3433	-12.8174	-12.5122	-15.8691	-12.8174	-16.7847	-13.4277	-178.223	-184.021	-219.421	-197.449	-270.386	-223.999	-249.634	-179.749	-212.402	-242.92	-316.467
	148.5	-11.5967	-11.5967	-20.1416	-12.5122	-15.564	-14.3433	-13.7329	-15.8691	-12.5122	-14.0381	-14.0381	-184.937	-180.969	-219.116	-197.449	-261.23	-219.727	-246.582	-185.242	-216.064	-237.122	-316.162
	148.6	-13.7329	-12.8174	-17.7002	-9.76562	-15.564	-14.6484	-16.7847	-17.395	-12.5122	-14.0381	-13.4277	-184.937	-177.002	-216.98	-195.007	-257.263	-222.168	-244.141	-187.683	-216.98	-230.713	-306.702
	148.7	-9.46045	-12.8174	-16.7847	-10.9863	-14.9536	-11.9019	-15.2588	-16.4795	-13.1226	-11.5967	-12.5122	-186.768	-179.443	-219.727	-196.838	-254.517	-227.966	-242.615	-186.462	-210.571	-224.609	-297.546
	148.8	-9.15527	-11.9019	-16.7847	-12.207	-13.7329	-11.9019	-12.207	-15.564	-13.4277	-11.5967	-10.376	-190.125	-180.359	-222.473	-200.806	-255.432	-227.661	-243.53	-185.852	-209.351	-221.252	-296.936
	148.9	-11.2915	-11.5967	-18.9209	-12.5122	-12.5122	-11.9019	-10.6812	-13.1226	-11.2915	-12.8174	-11.9019	-189.819	-179.443	-223.389	-198.364	-260.925	-224.609	-249.023	-185.852	-212.097	-220.337	-303.955
	149	-10.9863	-12.5122	-17.0898	-12.8174	-13.7329	-11.9019	-12.8174	-12.8174	-12.5122	-13.7329	-14.6484	-184.631	-180.359	-215.454	-197.754	-262.146	-228.271	-256.348	-188.599	-211.487	-225.22	-311.279
	149.1	-9.46045	-14.0381	-15.8691	-12.8174	-11.9019	-15.564	-15.2588	-14.9536	-12.207	-14.6484	-14.0381	-182.8	-181.58	-211.487	-205.994	-263.062	-235.596	-255.127	-189.514	-208.13	-225.83	-310.669
	149.2	-10.0708	-14.6484	-14.6484	-11.9019	-11.2915	-16.1743	-16.4795	-15.2588	-11.5967	-15.2588	-12.5122	-180.054	-183.716	-214.844	-203.247	-262.451	-242.31	-251.16	-186.768	-209.045	-223.999	-307.007
	149.3	-11.2915	-11.2915	-15.8691	-12.207	-10.9863	-13.4277	-12.5122	-14.3433	-12.8174	-13.4277	-9.46045	-176.697	-182.8	-217.285	-194.092	-262.451	-240.173	-250.549	-188.293	-209.961	-225.22	-307.007
	149.4	-12.207	-9.46045	-16.1743	-12.8174	-12.207	-12.207	-13.7329	-11.9019	-12.8174	-12.5122	-11.5967	-173.035	-183.411	-221.558	-195.618	-263.977	-231.934	-248.718	-188.904	-210.571	-225.525	-313.416
	149.5	-11.5967	-10.0708	-15.2588	-13.4277	-11.5967	-13.4277	-15.2588	-11.2915	-12.8174	-13.4277	-11.2915	-174.866	-187.073	-221.863	-196.228	-266.724	-230.103	-246.887	-186.768	-210.571	-225.525	-313.416
	149.6	-9.76562	-11.2915	-16.1743	-13.1226	-11.5967	-13.4277	-14.6484	-11.2915	-12.8174	-14.6484	-13.4277	-176.086	-188.599	-216.675	-191.345	-268.555	-231.628	-247.803	-185.547	-208.74	-226.44	-314.026
	149.7	-12.5122	-11.2915	-15.564	-11.2915	-12.207	-13.4277	-16.7847	-12.5122	-10.9863	-13.4277	-12.8174	-176.086	-191.04	-212.097	-189.514	-267.944	-231.018	-253.296	-181.58	-209.045	-222.778	-323.792
	149.8	-11.5967	-11.5967	-18.6157	-10.6812	-12.207	-12.8174	-17.0898	-13.4277	-13.1226	-11.9019	-10.6812	-177.307	-195.618	-217.896	-190.125	-263.977	-227.356	-257.263	-177.002	-210.876	-226.746	-326.538
	149.9	-10.6812	-12.207	-16.1743	-9.76562	-11.5967	-12.207	-14.3433	-13.1226	-15.2588	-13.4277	-11.5967	-179.443	-197.754	-221.558	-187.378	-263.977	-227.966	-258.789	-177.307	-214.233	-233.459	-315.247
	150	-12.5122	-12.207	-16.1743	-11.5967	-12.207	-11.5967	-12.5122	-11.9019	-15.564	-15.564	-12.8174	-182.19	-198.364	-220.947	-187.378	-270.386	-227.356	-256.958	-177.917	-211.487	-233.765	-303.04
	150.1	-11.5967	-12.207	-15.2588	-11.5967	-13.7329	-10.9863	-13.7329	-9.46045	-14.6484	-12.5122	-11.5967	-182.19	-199.28	-223.694	-187.378	-274.963	-230.103	-260.315	-179.138	-208.435	-235.291	-301.208
	150.2	-11.2915	-12.5122	-14.6484	-10.9863	-13.4277	-9.15527	-13.7329	-8.8501	-12.8174	-13.1226	-10.376	-177.002	-199.28	-226.135	-186.768	-272.522	-233.459	-259.705	-176.392	-207.825	-242.31	-302.124
	150.3	-14.3433	-10.0708	-16.1743	-9.76562	-13.7329	-11.2915	-14.6484	-10.6812	-13.4277	-12.5122	-10.9863	-172.424	-196.228	-220.032	-187.683	-267.639	-233.765	-257.568	-170.593	-207.214	-245.056	-297.852
	150.4	-11.5967	-10.6812	-16.7847	-11.9019	-11.5967	-12.207	-14.3433	-11.9019	-15.2588	-12.5122	-12.5122	-171.509	-195.618	-218.201	-191.345	-265.808	-236.511	-257.568	-170.898	-209.045	-240.784	-296.631
	150.5	-9.46045	-12.5122	-14.6484	-11.2915	-12.5122	-12.8174	-13.4277	-10.376	-16.1743	-14.6484	-12.5122	-175.781	-191.65	-219.116	-195.923	-262.451	-234.375	-261.841	-172.729	-208.435	-237.122	-298.462
	150.6	-12.207	-13.7329	-13.4277	-11.5967	-12.8174	-10.376	-14.0381	-10.376	-15.8691	-13.7329	-11.5967	-185.852	-188.293	-218.201	-198.975	-264.282	-229.187	-261.23	-174.561	-209.656	-231.934	-302.124
	150.7	-15.2588	-12.207	-14.9536	-11.2915	-11.5967	-11.2915	-13.7329	-9.76562	-14.6484	-10.376	-10.9863	-196.838	-186.157	-216.064	-201.111	-271.301	-231.934	-253.296	-177.612	-210.876	-231.018	-303.955
	150.8	-12.207	-12.207	-14.3433	-9.15527	-10.6812	-12.8174	-13.1226	-9.76562	-14.0381	-10.0708	-11.5967	-199.585	-188.293	-214.233	-202.942	-270.386	-241.394	-248.413	-181.885	-213.623	-231.934	-303.04
	150.9	-10.0708	-12.5122	-15.2588	-9.46045	-9.46045	-12.5122	-12.207	-10.376	-14.0381	-10.6812	-12.5122	-197.449	-187.073	-216.37	-203.247	-263.672	-244.141	-254.211	-178.528	-215.149	-234.07	-302.734
	151	-11.5967	-12.207	-14.6484	-10.9863	-11.5967	-11.2915	-12.5122	-11.9019	-13.4277	-11.2915	-12.5122	-196.838	-193.787	-215.759	-202.637	-265.198	-237.732	-257.568	-177.917	-223.083	-234.07	-301.514
	151.1	-13.1226	-12.207	-13.7329	-10.6812	-12.8174	-12.8174	-12.8174	-11.2915	-13.4277	-11.9019	-12.207	-196.228	-196.838	-214.233	-201.111	-266.113	-227.966	-254.211	-177.307	-230.103	-233.154	-311.279

## Sheet: Fig.1k
Figure. 1k
	mV \ I	150 Na+	150 NMDG+	150 K+	150 Cs+
	100	25.4228	19.3039	25.129	34.4375
	99.975	25.474	19.6127	25.1894	34.389
	99.95	25.5426	19.7887	25.3	34.5527
	99.925	25.4931	19.5823	25.2839	34.8249
	99.9	25.5232	19.526	25.0683	35.1323
	99.875	25.53	19.5438	24.8962	35.219
	99.85	25.5118	19.6149	25.1202	35.5303
	99.825	25.2054	19.3649	25.0417	35.5626
	99.8	25.2994	19.5007	25.1437	35.7503
	99.775	25.4836	19.6466	25.057	35.4489
	99.75	25.3573	19.395	24.8962	34.9458
	99.725	25.1162	19.2521	25.0435	34.855
	99.7	25.2123	19.3926	25.3483	35.1009
	99.675	25.2166	19.7259	25.2724	35.3487
	99.65	25.1646	19.3449	25.1852	35.835
	99.625	25.159	19.2233	25.0047	35.7796
	99.6	25.5117	19.1934	24.7283	35.3393
	99.575	25.838	19.7137	24.8408	35.492
	99.55	25.7012	19.7608	24.7557	35.9523
	99.525	25.3955	19.507	24.7905	36.263
	99.5	25.1925	19.5313	24.8109	36.3738
	99.475	24.9403	19.6193	24.9306	36.416
	99.45	24.9826	19.706	25.362	36.2201
	99.425	25.0927	19.5708	25.6332	36.573
	99.4	24.8962	19.4836	25.1688	36.7241
	99.375	24.9384	19.6165	25.0966	36.6555
	99.35	24.9377	19.6448	25.3438	36.9238
	99.325	24.8132	19.5312	25.622	37.1531
	99.3	24.8704	19.4874	25.5488	36.8922
	99.275	24.7212	19.3173	25.5928	36.4125
	99.25	24.8565	19.3185	26.1874	36.2193
	99.225	24.7169	19.2365	26.074	35.9971
	99.2	24.7464	19.112	25.8351	36.32
	99.175	24.6581	19.5148	25.6465	36.4818
	99.15	24.52	19.6827	25.8116	36.2876
	99.125	24.3696	19.496	25.6488	36.216
	99.1	24.0474	19.1756	25.5064	35.876
	99.075	24.0986	19.3541	25.6484	35.9647
	99.05	24.2053	19.576	25.2598	35.94
	99.025	24.366	19.4115	25.2168	35.3882
	99	24.4666	19.1612	25.0648	35.2971
	98.975	24.8991	19.1811	24.8396	35.4997
	98.95	25.1122	19.4594	25.0604	35.6174
	98.925	25.1141	19.3302	25.2881	35.4876
	98.9	24.9433	18.9472	25.3015	35.0367
	98.875	24.7995	18.8862	25.2679	35.0172
	98.85	24.4578	19.1765	25.3386	35.4777
	98.825	24.3512	19.1988	25.383	35.7298
	98.8	24.2068	19.0647	25.0529	35.8478
	98.775	24.4264	19.1017	24.927	36.4447
	98.75	24.675	19.1848	25.1539	36.6173
	98.725	24.6094	19.0565	25.1096	36.5117
	98.7	24.4089	18.9935	25.1015	35.9419
	98.675	24.4563	19.016	25.0787	35.6651
	98.65	24.6731	19.249	25.6849	35.4511
	98.625	24.889	19.3304	26.0063	35.6069
	98.6	24.5701	19.0928	25.6431	35.6262
	98.575	24.4826	19.1822	25.2613	35.4794
	98.55	24.9899	19.2126	25.351	35.3279
	98.525	24.9522	18.874	24.9593	35.8621
	98.5	25.0067	18.8827	25.1706	36.2934
	98.475	24.9743	19.0487	25.5565	36.5853
	98.45	24.8114	19.2079	26.0251	36.821
	98.425	24.6431	19.2696	25.8675	36.5771
	98.4	24.3993	19.4037	25.608	36.6355
	98.375	24.2528	19.2362	25.3556	36.5328
	98.35	24.2372	19.1103	25.3303	36.0492
	98.325	24.4967	19.0626	25.2077	36.0032
	98.3	24.861	18.9941	25.1721	36.0181
	98.275	24.8637	19.051	25.0613	36.2392
	98.25	24.8677	19.2827	25.069	36.7201
	98.225	24.5961	19.346	24.8096	36.8913
	98.2	24.2112	19.0006	24.582	36.6145
	98.175	24.2176	19.0278	24.5376	36.5468
	98.15	24.5462	19.3829	24.6308	37.0467
	98.125	24.4546	19.718	24.8195	37.4761
	98.1	24.3913	19.8113	24.8693	37.3227
	98.075	23.959	19.6802	24.9245	36.996
	98.05	23.9562	19.9421	25.3263	37.1852
	98.025	24.0427	19.8788	25.2871	37.0419
	98	24.1342	19.6188	24.752	37.042
	97.975	23.9313	19.3316	24.2554	37.2601
	97.95	24.1952	19.6364	24.5441	37.1643
	97.925	24.4937	19.5694	24.7228	37.5147
	97.9	24.6396	19.2701	24.6475	37.4116
	97.875	24.7177	19.065	24.7593	36.3953
	97.85	24.4883	19.0794	24.3631	35.9171
	97.825	24.4939	19.1166	24.5206	35.8138
	97.8	24.647	19.3467	24.573	35.7486
	97.775	24.6886	19.0858	24.5161	36.3414
	97.75	24.7839	18.9105	24.6273	36.7884
	97.725	24.5454	19.0056	24.6923	36.2586
	97.7	24.4309	19.1779	24.7726	35.7662
	97.675	24.0408	19.1836	24.7584	35.4214
	97.65	24.0766	19.324	24.7462	35.5832
	97.625	24.4534	19.7347	24.9023	36.1578
	97.6	24.2289	19.5964	24.858	36.8423
	97.575	23.8708	19.2093	24.5657	36.6923
	97.55	23.7452	19.1234	24.5042	36.3083
	97.525	23.7947	19.388	24.5007	36.1896
	97.5	23.9194	19.5672	24.2299	36.3775
	97.475	24.2934	19.2776	24.4923	36.4928
	97.45	24.4338	19.382	24.5733	36.2346
	97.425	24.5523	19.3635	24.9625	35.6153
	97.4	24.4116	19.5032	24.9545	35.5139
	97.375	24.4018	19.1398	24.9593	35.6424
	97.35	24.5182	19.2235	24.8821	35.7631
	97.325	24.5816	19.467	24.9688	35.6209
	97.3	24.5703	19.7724	24.9712	34.9632
	97.275	24.358	19.448	24.7726	34.5666
	97.25	24.038	19.0504	24.6974	34.412
	97.225	24.0918	19.0948	24.6549	34.5314
	97.2	24.2162	18.9445	24.5675	34.9805
	97.175	24.3863	18.849	24.2879	35.2035
	97.15	24.1332	18.8888	24.2662	34.7179
	97.125	23.975	19.0727	24.4344	34.4795
	97.1	23.8971	19.0665	24.4042	34.1944
	97.075	23.6028	18.763	24.0245	33.4897
	97.05	23.7543	18.6748	24.0306	33.3883
	97.025	24.2664	18.6789	24.1196	33.5775
	97	24.3238	18.7724	23.8462	33.5872
	96.975	24.3274	19.0096	23.6528	34.0972
	96.95	24.2531	18.7759	23.5588	34.3993
	96.925	24.2795	18.7712	23.6277	34.7111
	96.9	24.1552	19.0525	23.6125	34.3764
	96.875	24.2117	19.1912	23.5486	34.2443
	96.85	24.2869	19.1365	23.4612	34.5572
	96.825	23.9741	19.0821	23.4462	34.5866
	96.8	23.7688	19.1403	23.6129	34.6114
	96.775	23.858	19.0697	23.7055	34.856
	96.75	23.7864	18.9413	23.3567	34.937
	96.725	23.5923	18.7751	23.1451	34.8334
	96.7	23.7004	18.8327	23.3232	34.6629
	96.675	23.664	19.0323	23.4121	34.6168
	96.65	23.6421	19.0529	23.6958	34.7598
	96.625	23.5097	19.1218	23.4263	35.2798
	96.6	23.7379	19.0659	23.6093	35.7193
	96.575	23.9938	19.284	23.4888	35.6597
	96.55	23.7991	19.2715	23.6443	35.4532
	96.525	23.8917	19.0873	24.2744	35.3789
	96.5	24.0516	19.0648	24.4782	35.9379
	96.475	24.1128	19.043	24.7275	36.547
	96.45	24.1727	19.0155	25.0287	36.4534
	96.425	24.2808	19.1023	25.0651	36.0085
	96.4	24.429	19.0976	24.7856	35.3411
	96.375	24.4454	18.8474	24.1712	34.9718
	96.35	24.27	18.6407	23.9147	34.8892
	96.325	23.9506	18.4801	23.7589	34.4346
	96.3	23.8677	18.4735	23.8946	34.7267
	96.275	23.9184	18.5729	24.0119	34.9227
	96.25	23.7681	18.5698	23.8528	35.0989
	96.225	23.666	18.4759	23.9112	35.5945
	96.2	23.6109	18.5585	24.3748	35.8019
	96.175	23.3444	18.4759	24.0035	36.056
	96.15	23.4254	18.2571	24.0185	36.2567
	96.125	23.2821	18.3672	23.8068	36.0803
	96.1	23.2034	18.6383	24.0749	35.8361
	96.075	23.2928	18.5723	23.9505	35.8733
	96.05	23.7524	18.4873	23.9757	35.9757
	96.025	23.554	18.34	23.9552	35.5448
	96	23.5169	18.4712	23.9713	35.2205
	95.975	23.7908	18.563	24.1175	35.2195
	95.95	23.9139	18.3997	23.8376	35.4259
	95.925	23.803	18.2953	23.6957	35.5137
	95.9	23.6118	18.6146	23.8416	35.1735
	95.875	23.6033	18.6214	23.8897	34.7358
	95.85	23.4865	18.6542	24.1575	34.8722
	95.825	23.232	18.6581	24.2462	35.4985
	95.8	23.103	18.8328	24.5434	36.0201
	95.775	23.247	18.5835	24.6607	35.9822
	95.75	23.6347	18.5371	24.8259	35.8216
	95.725	23.6609	18.8045	24.8353	35.0466
	95.7	23.4845	18.5753	24.4966	34.2991
	95.675	23.2877	18.4924	24.3683	34.1114
	95.65	23.2401	18.7181	24.4254	34.1333
	95.625	23.2537	19.0427	24.5804	34.3458
	95.6	23.1238	19.1013	24.4423	34.4196
	95.575	23.0494	18.7859	24.3386	33.7169
	95.55	23.1367	18.9459	24.6281	33.4601
	95.525	23.2613	18.9119	24.8948	33.7734
	95.5	23.422	18.6928	24.7154	34.2543
	95.475	23.7916	18.4951	24.6203	34.3527
	95.45	24.086	18.5615	24.719	34.0778
	95.425	24.0159	18.4685	24.7714	33.8321
	95.4	23.9481	18.4933	24.6852	33.7596
	95.375	23.9185	18.3032	24.7092	33.8456
	95.35	23.9447	18.5746	24.7832	33.5163
	95.325	23.5256	18.4818	24.4092	32.6672
	95.3	23.3257	18.561	24.38	32.2717
	95.275	23.2538	18.6353	24.2317	32.0294
	95.25	23.4534	18.8864	24.818	32.1615
	95.225	23.0984	18.674	24.3656	32.3548
	95.2	22.777	18.6385	24.0245	32.8843
	95.175	22.8989	18.4264	23.7989	33.553
	95.15	23.2704	18.461	23.9959	33.8647
	95.125	23.3704	18.4317	24.1683	33.6282
	95.1	23.4053	18.1898	24.0225	33.267
	95.075	23.609	18.1196	23.9497	32.6678
	95.05	23.7896	18.0937	23.8228	32.14
	95.025	23.8461	18.1248	24.0112	32.4393
	95	23.617	18.1775	23.5552	32.4126
	94.975	23.6391	18.4473	23.433	32.2767
	94.95	23.6473	18.7651	23.8509	32.3725
	94.925	23.5491	18.7204	24.0229	32.4245
	94.9	23.5189	18.6446	23.9575	32.2381
	94.875	23.4619	18.6714	23.6186	32.1579
	94.85	23.4666	18.7828	23.8258	32.3436
	94.825	23.0469	18.5842	23.8523	32.725
	94.8	23.0617	18.3313	24.0355	33.0057
	94.775	22.8027	18.1013	23.6739	32.7276
	94.75	22.8663	18.514	23.5542	32.5993
	94.725	22.9054	18.5367	23.4084	32.6894
	94.7	22.964	18.2446	23.44	33.1093
	94.675	22.8163	18.1284	23.4971	33.3173
	94.65	23.0761	18.4335	23.5423	33.4328
	94.625	23.1558	18.5034	23.7082	33.3755
	94.6	23.3736	18.5358	23.6822	33.456
	94.575	23.2455	18.5362	23.5811	33.3062
	94.55	23.2908	18.5355	23.8178	33.3222
	94.525	23.1102	18.4523	23.7732	33.3191
	94.5	23.3748	18.6087	23.9939	32.8021
	94.475	23.4804	18.6146	23.9348	32.6155
	94.45	23.2118	18.3599	23.8475	32.7376
	94.425	23.1894	18.2497	23.9787	32.5618
	94.4	23.4699	18.445	24.1284	32.6374
	94.375	23.6188	18.3315	24.2598	32.6741
	94.35	23.4622	18.2142	24.3609	32.2838
	94.325	23.307	18.3492	24.4493	31.928
	94.3	23.4583	18.1767	24.5676	31.9757
	94.275	23.5232	18.0199	24.2415	32.5878
	94.25	23.8923	17.9335	24.0792	32.8776
	94.225	23.8849	17.6758	23.8431	33.143
	94.2	23.7935	17.5924	23.81	33.2687
	94.175	23.6207	17.501	23.6566	33.256
	94.15	23.6462	17.5267	23.73	33.7193
	94.125	23.423	17.9047	23.7243	33.814
	94.1	23.427	18.1402	24.0289	33.6772
	94.075	23.6108	17.7654	24.2062	33.1318
	94.05	23.6805	17.9977	23.9174	32.5673
	94.025	23.8274	17.9352	23.7767	32.4046
	94	23.963	18.0357	23.804	32.4004
	93.975	23.7626	18.0415	24.074	32.0161
	93.95	23.647	18.3888	23.9751	31.9053
	93.925	23.8079	18.2666	23.7903	31.8927
	93.9	24.0867	18.3727	23.8754	32.0649
	93.875	23.9045	18.3994	23.7048	32.1117
	93.85	23.6856	18.491	23.7257	32.0718
	93.825	23.5574	18.4943	23.413	31.899
	93.8	23.754	18.4236	23.4255	32.0276
	93.775	23.7971	18.3186	23.4389	32.0989
	93.75	23.7208	18.2944	23.4759	31.563
	93.725	23.6641	18.0956	23.385	31.1717
	93.7	23.5812	18.1731	23.2704	30.9057
	93.675	23.4433	18.2951	23.0821	31.3497
	93.65	23.2848	18.2354	22.9291	31.2482
	93.625	23.3223	18.4029	23.3119	30.9056
	93.6	23.2146	18.4226	23.3186	31.2904
	93.575	23.2727	18.3133	23.1304	32.0955
	93.55	23.0938	18.3679	22.9604	32.4126
	93.525	23.0021	18.3473	23.1693	32.93
	93.5	23.2737	18.6414	23.3335	32.7317
	93.475	23.5056	18.7115	23.8011	32.34
	93.45	23.2482	18.5112	23.858	31.7238
	93.425	23.0583	18.4387	23.8712	31.2404
	93.4	23.3292	18.605	24.0018	31.6445
	93.375	23.6819	18.2449	24.1906	32.1738
	93.35	23.6783	18.3882	24.3996	32.4194
	93.325	23.3537	18.1726	24.0388	32.3534
	93.3	23.4987	18.1725	24.1934	31.9753
	93.275	23.3502	18.3117	24.231	31.9707
	93.25	23.2568	18.4161	24.4605	32.1234
	93.225	23.376	18.3283	24.3394	32.4197
	93.2	23.4126	18.1561	24.5332	32.8082
	93.175	23.2999	18.1927	24.4351	32.6696
	93.15	23.3997	18.3684	24.4862	32.0736
	93.125	23.3861	18.3371	24.1349	32.2051
	93.1	23.2469	18.6009	24.0516	32.9651
	93.075	23.1454	18.628	24.0272	32.975
	93.05	23.1677	18.5053	24.0765	32.3533
	93.025	23.1438	18.3779	24.0793	32.2278
	93	23.2749	18.3331	24.1607	32.7365
	92.975	23.479	18.4706	24.2979	32.8215
	92.95	23.41	18.3417	24.315	32.4953
	92.925	23.3332	18.3599	24.3868	32.568
	92.9	23.2956	18.2759	24.3433	32.5669
	92.875	23.2434	18.1982	24.5824	32.6755
	92.85	23.2375	18.3549	24.8393	33.4246
	92.825	23.0456	18.4005	24.4453	34.002
	92.8	23.1009	18.3295	24.1943	34.1789
	92.775	23.256	18.4151	24.3213	33.8427
	92.75	23.4843	18.4496	24.7251	33.389
	92.725	23.4066	18.1607	24.5089	32.9713
	92.7	23.348	18.0626	24.3309	32.7249
	92.675	23.1133	18.0621	24.3293	32.9101
	92.65	23.1446	18.2011	24.4168	33.2909
	92.625	23.0707	18.2248	24.4219	33.1476
	92.6	23.2499	18.4573	24.2699	32.7311
	92.575	23.0931	18.4269	23.9278	32.2882
	92.55	23.3906	18.3543	23.7686	32.5615
	92.525	23.1926	18.355	23.7255	32.8015
	92.5	23.1473	18.3284	23.7444	32.7125
	92.475	23.351	18.4674	23.9134	32.7666
	92.45	23.5666	18.4115	24.0687	32.8642
	92.425	23.3243	18.1018	24.0039	32.7731
	92.4	23.0415	18.0842	24.0909	32.5484
	92.375	22.7986	18.4705	24.1937	32.76
	92.35	22.7113	18.6747	24.2675	32.8321
	92.325	22.6519	18.4154	24.1277	32.6996
	92.3	22.6375	18.2917	24.2889	32.2802
	92.275	22.8193	18.1361	24.4889	31.5606
	92.25	23.1583	17.9623	24.6332	31.4798
	92.225	23.1653	17.8141	24.3304	31.829
	92.2	23.0565	17.7142	23.9114	31.6816
	92.175	22.8744	17.8855	23.6609	31.7003
	92.15	22.8296	17.9677	23.5677	32.2204
	92.125	22.8258	17.9513	23.5616	32.9071
	92.1	22.7299	17.9658	23.3009	33.4122
	92.075	22.6591	17.9884	23.0947	33.1345
	92.05	22.9134	18.0921	23.4022	32.6969
	92.025	22.717	17.8781	23.2811	32.4647
	92	22.3564	17.9036	22.8603	32.1481
	91.975	22.5039	18.0057	23.0203	31.567
	91.95	22.7768	18.3997	23.36	31.5708
	91.925	22.7526	18.0626	23.6877	31.9294
	91.9	22.6269	17.859	23.6788	32.1234
	91.875	22.6544	17.8577	23.9433	32.1373
	91.85	22.3162	17.9689	24.3111	31.9332
	91.825	22.4177	17.9902	24.0546	31.5955
	91.8	22.3768	17.7238	24.0097	31.9169
	91.775	22.4762	17.6951	23.9542	32.0443
	91.75	22.2979	17.8551	24.0605	31.7019
	91.725	22.2021	17.8462	23.9171	31.5939
	91.7	22.3645	17.8585	23.9925	31.8489
	91.675	22.4737	17.7934	24.017	32.3197
	91.65	22.7294	17.7223	23.8822	32.814
	91.625	22.7568	17.4879	23.617	32.9495
	91.6	22.6063	17.4043	23.4023	32.5723
	91.575	22.6188	17.4474	23.452	32.4002
	91.55	22.9651	17.6171	23.7205	32.8766
	91.525	22.8853	17.5268	23.603	33.2608
	91.5	22.8032	17.2901	23.3372	33.1018
	91.475	22.9044	17.098	23.2755	32.7691
	91.45	23.2096	17.2914	23.3874	32.7724
	91.425	23.3729	17.4725	23.3561	33.1125
	91.4	23.1729	17.3718	23.3552	33.3116
	91.375	22.6117	17.1745	23.1013	33.0917
	91.35	22.6277	17.5086	23.455	32.7935
	91.325	22.6331	17.5419	23.4148	32.6554
	91.3	22.811	17.7692	23.6213	32.2313
	91.275	22.6902	17.5977	23.5034	32.3439
	91.25	22.7445	17.5615	23.5217	32.4848
	91.225	22.9284	17.6948	23.2183	32.3741
	91.2	23.0704	17.6497	23.2064	32.0812
	91.175	22.5701	17.2472	22.9183	32.1879
	91.15	22.4029	17.3571	22.9631	32.3207
	91.125	22.72	17.753	23.2434	32.7134
	91.1	22.9209	17.6384	23.4411	32.8949
	91.075	23.0452	17.4227	23.3456	32.7839
	91.05	22.9911	17.4538	23.1544	32.5666
	91.025	22.9749	17.8097	23.2263	32.3567
	91	22.7339	17.8807	23.0882	32.4552
	90.975	22.5004	17.6737	22.8329	32.5126
	90.95	22.7547	17.6009	22.8885	32.4651
	90.925	22.8452	17.9134	23.1681	32.2201
	90.9	22.9523	17.7329	23.3011	31.8564
	90.875	22.7004	17.4102	23.4737	31.8526
	90.85	22.5828	17.4316	23.8093	32.0437
	90.825	22.4603	17.6405	23.7038	32.3663
	90.8	22.7555	17.7139	23.778	32.3181
	90.775	22.6515	17.4483	23.5753	32.3232
	90.75	22.7194	17.3786	23.6527	32.449
	90.725	22.7883	17.324	23.3025	32.2298
	90.7	23.1371	17.3703	23.4095	32.3006
	90.675	22.8377	17.0071	23.5012	32.0884
	90.65	22.5636	17.0511	23.7145	31.6042
	90.625	22.3385	17.1579	23.64	31.036
	90.6	22.3145	17.2903	23.4011	30.7306
	90.575	22.2197	17.3485	23.2321	30.5408
	90.55	22.4663	17.335	23.2451	30.6458
	90.525	22.5679	17.3796	23.3566	31.231
	90.5	22.8056	17.6532	23.5543	31.5413
	90.475	22.8863	17.7006	23.1225	31.5573
	90.45	22.8747	17.513	22.8779	31.5858
	90.425	22.9105	17.4938	22.9972	31.6646
	90.4	22.8617	17.473	23.0966	31.4883
	90.375	22.7683	17.4474	23.0986	30.8618
	90.35	22.7088	17.5653	22.9429	30.8247
	90.325	22.8421	17.681	23.0494	30.8776
	90.3	22.9436	17.7001	23.215	30.8855
	90.275	22.6306	17.6195	23.1247	31.063
	90.25	22.6368	17.5878	23.057	30.7774
	90.225	22.8259	17.5921	23.0194	30.5456
	90.2	22.9049	17.6868	22.9501	30.7003
	90.175	22.7653	17.3875	22.7593	30.6641
	90.15	22.6813	17.5173	23.0255	30.8303
	90.125	22.4878	17.3186	23.0888	30.9233
	90.1	22.5671	17.4029	22.8799	31.2699
	90.075	22.6136	17.5905	22.7554	31.6899
	90.05	22.6024	17.3176	22.6781	31.9878
	90.025	22.4583	17.0557	22.3351	31.7469
	90	22.7079	17.4438	22.7657	31.899
	89.975	22.4596	17.5843	22.9974	32.2233
	89.95	22.3253	17.7545	22.9948	32.6008
	89.925	22.2799	17.6516	22.878	32.708
	89.9	22.4348	17.509	22.8824	32.7059
	89.875	22.4495	17.2314	22.6771	32.538
	89.85	22.4676	17.1624	22.7601	32.4465
	89.825	22.6373	17.1375	22.7427	32.4939
	89.8	22.7229	17.3122	22.7843	32.6089
	89.775	22.933	17.4844	22.4288	32.9783
	89.75	22.8449	17.4398	22.3794	33.2752
	89.725	22.7969	17.5333	22.2928	33.2723
	89.7	22.7361	17.7675	22.4977	33.1161
	89.675	22.5968	17.7142	22.529	32.9584
	89.65	22.4682	17.4125	22.9044	33.2546
	89.625	22.2798	17.297	22.8431	33.5479
	89.6	22.3935	17.3888	22.9403	33.5216
	89.575	22.6139	17.7561	23.0815	33.2574
	89.55	22.7366	17.942	22.8616	33.2741
	89.525	22.6132	17.812	22.5645	32.8792
	89.5	22.6066	17.5586	22.29	32.4972
	89.475	22.5853	17.5237	22.0153	32.4864
	89.45	22.5339	17.6343	22.1982	32.5733
	89.425	22.5278	17.5546	22.4276	32.5911
	89.4	22.0036	17.642	22.4306	32.5853
	89.375	22.0121	17.6726	22.3035	32.5053
	89.35	22.2346	17.3232	22.3178	32.4483
	89.325	22.2788	17.3618	22.112	32.7187
	89.3	22.5151	17.6458	22.0054	32.5984
	89.275	22.4418	17.6052	21.8345	32.5911
	89.25	22.2882	17.4704	21.9323	32.5254
	89.225	21.8486	17.482	21.7975	32.5447
	89.2	21.839	17.2285	22.0028	32.3443
	89.175	22.0092	17.4417	22.2616	32.5657
	89.15	22.086	17.2957	22.2645	32.657
	89.125	22.0735	17.2312	22.1326	32.4644
	89.1	21.9874	16.9249	22.136	32.0927
	89.075	21.8964	17.1059	22.189	32.1299
	89.05	22.0491	17.2012	22.2506	32.1725
	89.025	21.924	17.337	22.3149	32.5809
	89	21.8936	17.5851	22.4206	32.6403
	88.975	22.1356	17.5402	22.7096	32.8753
	88.95	22.447	17.5832	22.935	33.001
	88.925	22.2003	17.5422	22.7348	32.6061
	88.9	21.9554	17.284	22.604	32.3784
	88.875	21.9958	17.1687	23.0147	32.7658
	88.85	22.1489	17.2145	23.063	32.6703
	88.825	21.9859	17.2087	22.6391	32.5635
	88.8	22.2466	17.2732	22.367	32.4713
	88.775	22.2997	17.3575	22.2472	32.1613
	88.75	22.4489	17.5069	22.52	32.4986
	88.725	22.3561	17.2301	22.3333	32.5854
	88.7	22.3993	17.2687	22.3243	32.2495
	88.675	22.5522	17.365	22.1531	31.6807
	88.65	22.7965	17.2497	22.1083	31.7559
	88.625	22.5553	17.2786	22.1511	32.4781
	88.6	22.2144	17.3241	22.1195	32.7499
	88.575	22.0466	17.1293	21.7921	32.3165
	88.55	22.0717	17.2139	21.7868	32.15
	88.525	21.9785	17.0938	21.852	32.3009
	88.5	21.9273	17.1304	21.8277	32.3168
	88.475	21.999	17.1264	21.7532	32.2921
	88.45	21.8327	17.0937	21.7736	32.3669
	88.425	21.5762	16.9015	21.667	32.3889
	88.4	21.3974	16.7291	21.8137	32.0475
	88.375	21.6201	16.7434	21.88	32.0444
	88.35	21.8404	16.9894	22.194	32.0791
	88.325	21.9306	17.1175	22.1664	31.8956
	88.3	21.7877	17.2995	22.1444	31.0969
	88.275	21.5184	17.2648	22.2449	31.1023
	88.25	21.7815	17.4458	22.3824	31.5426
	88.225	21.7464	17.3358	21.9353	31.8243
	88.2	21.6959	17.1537	21.7603	31.6627
	88.175	21.5881	17.1527	21.5353	31.2631
	88.15	21.9627	17.1307	21.8948	31.1085
	88.125	21.7351	17.107	22.1603	31.3587
	88.1	21.7227	17.4606	22.3191	31.028
	88.075	21.7689	17.5956	22.2335	30.9565
	88.05	21.7582	17.5159	22.1811	30.9296
	88.025	21.7585	17.2721	22.0821	30.7093
	88	21.5199	17.1894	21.8491	30.9285
	87.975	21.4074	17.5401	21.8593	31.4538
	87.95	21.4612	17.8336	21.8761	31.7197
	87.925	21.4999	17.6587	22.0102	31.3375
	87.9	21.273	17.1448	21.9545	30.561
	87.875	21.1368	17.0038	21.945	30.3183
	87.85	21.1555	16.9811	21.6219	30.4956
	87.825	21.191	16.9246	21.5918	31.1346
	87.8	21.2894	16.772	21.969	31.2264
	87.775	21.1021	16.8372	22.2223	31.0618
	87.75	21.2799	16.8851	22.7598	31.2389
	87.725	21.6618	16.593	22.8746	31.1678
	87.7	21.4577	16.4127	22.9198	30.9823
	87.675	21.2225	16.6096	22.9967	30.7656
	87.65	21.3864	16.7303	22.9401	30.4365
	87.625	21.4321	16.8279	22.5962	30.4326
	87.6	21.7143	17.0134	22.6575	30.5241
	87.575	21.6027	16.9913	22.5847	30.4761
	87.55	21.681	17.1276	22.5081	30.509
	87.525	21.7067	17.2016	22.583	30.9394
	87.5	21.4335	16.8607	22.3553	31.1399
	87.475	21.2529	16.7244	22.0743	30.8338
	87.45	21.0751	16.7746	22.2466	30.4846
	87.425	21.0896	16.9423	22.3098	30.22
	87.4	21.3423	17.0531	22.2134	30.1499
	87.375	21.2542	17.0417	22.076	30.1068
	87.35	21.0192	16.9828	21.9695	29.8187
	87.325	21.2185	17.0249	21.8969	29.7998
	87.3	21.4599	17.1362	22.0207	30.4238
	87.275	21.3407	17.1176	21.7886	30.9724
	87.25	21.165	16.8087	21.5483	30.748
	87.225	21.3339	16.8737	21.8368	30.625
	87.2	21.4908	16.8713	22.0816	30.7595
	87.175	21.1996	16.9991	21.8761	31.2539
	87.15	21.1259	17.1646	21.8692	31.2976
	87.125	21.1221	17.1916	21.9113	30.646
	87.1	21.3056	17.2019	22.1451	30.5029
	87.075	21.3249	17.2735	22.0062	30.9651
	87.05	21.3813	17.2624	22.0276	31.2723
	87.025	21.414	17.1949	22.2265	31.5169
	87	21.4065	17.0472	22.1979	31.4129
	86.975	21.2458	16.8507	22.4029	31.0744
	86.95	21.3096	16.9154	22.468	31.0883
	86.925	21.2611	16.5488	22.4852	31.1384
	86.9	21.2074	16.4825	22.1606	30.9782
	86.875	21.1757	16.7531	22.1018	31.0644
	86.85	21.2328	16.7255	22.1423	31.2444
	86.825	21.1028	16.4902	22.2311	31.0621
	86.8	21.2499	16.628	22.3616	31.0403
	86.775	21.4499	16.7115	22.4416	31.3808
	86.75	21.6619	16.6372	22.5746	31.3285
	86.725	21.6205	16.6419	22.4481	30.8885
	86.7	21.5388	16.857	22.608	30.8358
	86.675	21.354	16.6984	22.3841	30.633
	86.65	21.5524	16.5279	22.1407	30.8893
	86.625	21.6821	16.4776	22.0103	31.1681
	86.6	21.6955	16.654	22.1091	31.3734
	86.575	21.5594	16.8128	22.2326	31.394
	86.55	21.3995	16.8222	22.1721	31.5042
	86.525	21.412	16.4981	22.1285	31.4981
	86.5	21.3342	16.5329	22.0875	31.5833
	86.475	21.3892	16.8506	21.983	31.8614
	86.45	21.3175	16.8631	22.1744	31.65
	86.425	21.0073	16.6196	21.8632	31.2219
	86.4	21.055	16.6663	21.8467	31.1987
	86.375	21.1648	16.7152	22.1295	31.4314
	86.35	20.9968	16.5864	22.2767	31.1426
	86.325	21.2127	16.413	22.0643	31.0699
	86.3	21.4736	16.5659	22.1127	31.1603
	86.275	21.697	16.56	22.2741	31.1519
	86.25	21.5355	16.531	22.1992	30.9978
	86.225	21.3715	16.2319	21.7757	30.9789
	86.2	21.2643	16.4076	21.7697	31.0946
	86.175	21.4122	16.5373	21.68	30.8869
	86.15	21.4535	16.41	21.8213	30.5134
	86.125	21.4031	16.1461	21.9571	30.2539
	86.1	21.2067	16.1412	21.9386	29.7386
	86.075	21.2074	16.3836	21.7787	29.622
	86.05	21.4017	16.3557	21.9896	29.9955
	86.025	21.2199	16.2331	21.9055	30.2262
	86	21.2117	16.278	21.8285	30.4969
	85.975	21.456	16.4496	21.7828	30.2308
	85.95	21.5498	16.3033	21.9805	29.7122
	85.925	21.3801	16.2683	22.0313	29.474
	85.9	21.2218	16.5346	22.1627	29.4646
	85.875	21.2462	16.4907	22.1349	29.2721
	85.85	21.2722	16.5464	21.7981	29.2719
	85.825	21.1241	16.781	21.6981	29.4896
	85.8	20.6332	16.3551	21.5854	29.5215
	85.775	20.3656	16.4257	21.8321	29.9911
	85.75	20.6179	16.5059	21.8238	29.8093
	85.725	20.7668	16.5513	21.6835	29.2139
	85.7	20.8025	16.4568	21.5558	29.2278
	85.675	20.9576	16.6007	21.4391	29.2371
	85.65	21.2051	16.5757	21.4295	29.0788
	85.625	21.2124	16.7011	21.5951	29.4409
	85.6	21.2207	16.761	21.5739	29.7229
	85.575	21.1123	16.7371	21.8343	29.6731
	85.55	21.4365	16.8645	22.2027	29.6655
	85.525	21.4535	16.8364	22.0353	29.2975
	85.5	21.3062	16.5893	21.9897	28.6792
	85.475	21.1732	16.4958	21.8695	28.4217
	85.45	21.5184	16.7067	21.8375	28.5511
	85.425	21.7737	16.8367	22.1148	29.0384
	85.4	21.534	16.516	22.0179	28.9776
	85.375	21.4822	16.4241	21.8709	29.0262
	85.35	21.5395	16.6391	21.752	28.6728
	85.325	21.2743	16.766	21.8323	28.1397
	85.3	20.9784	16.5079	21.6226	27.8358
	85.275	20.974	16.4725	21.5926	28.3298
	85.25	21.0713	16.723	21.6782	28.754
	85.225	20.9324	16.6915	21.698	29.1626
	85.2	20.7933	16.4063	21.4971	29.1696
	85.175	20.7415	16.3026	21.4701	28.9021
	85.15	20.8457	16.444	21.3661	28.9718
	85.125	20.9203	16.5569	21.3646	29.0145
	85.1	20.9804	16.0851	21.4953	29.2762
	85.075	21.1011	15.7884	21.653	29.6416
	85.05	21.2473	15.7601	21.6332	29.6335
	85.025	21.2341	16.106	21.6683	29.3251
	85	21.1049	16.29	21.4255	29.3426
	84.975	21.094	16.1931	21.299	29.5553
	84.95	21.3146	16.3574	21.0882	29.6554
	84.925	21.2859	16.1071	21.3129	29.5888
	84.9	21.0926	16.1355	21.4498	29.3925
	84.875	20.9298	16.0162	21.4004	29.2058
	84.85	21.1528	16.0995	21.3527	29.822
	84.825	21.2772	16.0362	21.3491	30.0104
	84.8	21.3849	16.0581	21.1744	29.5949
	84.775	21.1807	16.1832	20.9244	29.4586
	84.75	21.0355	16.5354	21.2651	29.4112
	84.725	21.0353	16.503	21.3119	29.1741
	84.7	21.1994	16.3095	21.3237	29.3669
	84.675	21.0568	16.1605	21.2681	29.143
	84.65	20.9688	16.1988	21.3168	28.8543
	84.625	21.0695	16.1744	21.4674	28.9484
	84.6	21.1426	16.1632	21.492	29.0901
	84.575	21.3449	16.1802	21.5635	28.9875
	84.55	21.6524	16.2416	21.5051	29.0894
	84.525	21.5028	16.2498	21.4344	29.4518
	84.5	21.3062	16.1632	21.5767	29.62
	84.475	21.2714	16.1018	21.6187	29.3598
	84.45	21.2506	16.0969	21.2883	29.1575
	84.425	21.3562	16.1632	21.6166	29.0413
	84.4	21.215	16.3061	21.7164	29.0948
	84.375	20.9795	16.3206	21.5519	29.4605
	84.35	20.9723	16.0624	21.4519	29.602
	84.325	21.2141	15.9743	21.4019	29.695
	84.3	21.1918	15.9727	21.4643	29.8817
	84.275	21.0067	15.7555	21.3805	29.5993
	84.25	21.0857	15.6232	21.3586	29.707
	84.225	20.9831	15.6258	21.5518	30.4641
	84.2	20.9425	15.9579	21.8502	30.7464
	84.175	20.95	16.0153	21.7492	30.6882
	84.15	21.0026	16.089	21.4068	30.4939
	84.125	21.2254	16.2573	21.3236	30.2714
	84.1	21.1979	16.3854	21.3542	29.7677
	84.075	21.0284	16.4637	21.2495	29.6876
	84.05	21.0066	16.3875	21.041	29.5732
	84.025	20.9181	16.1204	21.1781	29.3548
	84	20.9567	16.1334	21.5277	28.8808
	83.975	20.9384	16.2007	21.5093	28.9431
	83.95	20.7884	16.0434	21.2152	28.955
	83.925	21.1632	16.1977	21.5151	28.8117
	83.9	21.2874	16.0649	21.4942	28.9629
	83.875	21.1888	16.0113	21.6932	29.6415
	83.85	20.9944	16.058	21.4652	29.7737
	83.825	20.9363	15.9813	21.2716	29.9043
	83.8	21.1482	15.8596	21.3814	30.1068
	83.775	21.0791	15.7434	21.3722	30.4053
	83.75	21.0409	15.7021	21.2131	31.1111
	83.725	20.7589	15.8511	20.8758	31.519
	83.7	20.6502	15.9704	20.9892	31.6406
	83.675	20.4422	16.2865	20.957	31.1356
	83.65	20.4398	16.1308	20.7761	30.7365
	83.625	20.1863	16.1857	20.8956	30.4601
	83.6	20.5312	16.3323	21.287	30.5312
	83.575	20.3894	15.8863	21.0231	30.2503
	83.55	20.3306	15.9147	20.7301	29.966
	83.525	20.1285	15.8614	20.5712	29.9576
	83.5	20.3863	15.8193	20.4851	30.0095
	83.475	20.6186	15.8303	20.858	30.2583
	83.45	20.7667	15.7053	20.8146	30.2856
	83.425	20.7146	15.6782	20.7042	30.2317
	83.4	20.6986	15.8469	20.6808	30.3307
	83.375	20.4578	15.8116	20.3028	30.5653
	83.35	20.4643	16.1158	20.3368	30.4127
	83.325	20.523	16.0968	20.322	30.0064
	83.3	20.6373	16.1033	20.3049	29.6913
	83.275	20.52	16.1331	20.5745	29.8474
	83.25	20.5072	16.2493	20.6862	29.7587
	83.225	20.6782	16.0142	20.6252	29.6784
	83.2	20.785	16.0155	20.7776	30.0788
	83.175	20.6688	16.0877	21.0556	30.1249
	83.15	20.5253	16.0671	21.0712	30.162
	83.125	20.5461	16.0055	21.124	30.1593
	83.1	20.6359	15.8001	20.9991	29.8512
	83.075	20.6908	15.5345	21.2871	30.074
	83.05	20.5614	15.4096	21.2558	30.3151
	83.025	20.7484	15.7017	21.0738	30.203
	83	20.6847	15.5964	20.9202	29.7883
	82.975	20.5817	15.5807	21.0277	29.6337
	82.95	20.4395	15.7655	20.9862	29.3503
	82.925	20.194	15.5286	20.8868	29.0215
	82.9	20.1828	15.8079	21.0869	28.5928
	82.875	20.3146	15.6797	21.1244	28.503
	82.85	20.2599	15.8561	21.1131	28.5536
	82.825	20.1636	15.7692	20.754	28.3099
	82.8	20.3978	15.7398	20.9117	28.4213
	82.775	20.4047	15.7606	20.8228	28.3267
	82.75	20.1739	15.8561	20.6702	28.1956
	82.725	20.1046	15.9018	20.385	28.2803
	82.7	20.189	16.0587	20.4712	28.4958
	82.675	20.1709	15.9484	20.3813	28.3551
	82.65	19.8091	15.8889	20.1521	28.4436
	82.625	19.8229	15.9912	19.8005	28.8619
	82.6	19.8825	16.0859	19.6891	28.6156
	82.575	20.0286	15.8669	19.8153	28.0095
	82.55	20.0852	15.6307	19.9911	27.7477
	82.525	20.0297	15.7921	20.2297	27.5232
	82.5	19.8315	15.883	20.3646	27.4213
	82.475	20.0402	16.0146	20.478	27.7847
	82.45	20.1819	15.946	20.4083	27.6465
	82.425	20.0589	15.9975	20.4242	27.5304
	82.4	20.1548	16.2083	20.3245	27.3844
	82.375	20.2176	16.346	20.4612	27.2033
	82.35	20.2289	16.3518	20.6291	27.13
	82.325	20.4513	16.4993	20.5696	26.8601
	82.3	20.2734	16.153	20.0772	26.7037
	82.275	20.1373	16.1803	20.0992	27.0554
	82.25	20.2692	16.1177	20.0689	27.3239
	82.225	20.1378	15.7557	20.1293	27.0998
	82.2	20.1992	16.0231	20.4794	27.5063
	82.175	20.4186	16.4087	20.7814	27.8798
	82.15	20.4239	16.4949	20.3366	28.0064
	82.125	20.2668	16.2276	20.0864	27.9286
	82.1	20.2836	16.03	19.9584	27.8119
	82.075	20.3785	15.9824	19.9186	27.7463
	82.05	20.7337	15.8537	20.1049	27.7347
	82.025	20.4756	15.8205	19.9131	28.0121
	82	20.086	15.8971	19.8247	28.2713
	81.975	19.9795	15.9602	20.3054	28.1772
	81.95	19.9686	16.0746	20.6002	28.206
	81.925	19.8135	16.0381	20.5986	27.8065
	81.9	19.7081	15.8169	20.2508	27.1255
	81.875	20.1478	15.5755	20.0637	27.2162
	81.85	20.4549	15.5368	19.9721	27.3881
	81.825	20.3962	15.4659	19.9608	27.5127
	81.8	20.4461	15.4018	19.8904	27.4793
	81.775	20.4704	15.4927	19.9308	27.7301
	81.75	20.4391	15.5317	20.0437	27.8477
	81.725	20.3535	15.3407	19.7572	27.6601
	81.7	20.5021	15.2938	19.6086	27.5621
	81.675	20.3413	15.6593	19.4661	27.313
	81.65	20.3442	15.7087	19.413	27.0094
	81.625	20.2016	15.5985	19.3401	27.1057
	81.6	20.0644	15.2907	19.2088	27.3375
	81.575	20.0743	15.485	19.048	27.8494
	81.55	20.0522	15.7793	19.2806	28.5691
	81.525	19.8403	15.5652	19.3291	28.647
	81.5	19.9069	15.585	19.1658	28.4334
	81.475	19.622	15.4574	18.9639	27.8138
	81.45	19.6813	15.5281	19.1238	27.5282
	81.425	19.6743	15.2485	19.1124	27.5702
	81.4	19.8608	15.3559	19.1206	27.588
	81.375	19.6372	15.6052	19.1284	27.7228
	81.35	19.6672	15.617	19.0963	28.1538
	81.325	19.6294	15.4908	18.7056	28.2522
	81.3	19.6682	15.6386	18.7381	27.9653
	81.275	19.7458	15.6333	19.0074	27.7891
	81.25	19.7357	15.476	19.3189	27.7671
	81.225	19.6364	15.3653	19.3668	27.7811
	81.2	19.7065	15.6211	19.3511	27.9708
	81.175	19.3418	15.3783	18.8406	28.04
	81.15	19.2597	15.112	18.7678	27.9822
	81.125	19.3237	14.9484	18.7597	27.5006
	81.1	19.4804	15.1515	18.9953	27.5045
	81.075	19.3651	15.1844	18.9809	27.8205
	81.05	19.184	15.1972	19.0351	27.9353
	81.025	19.1216	15.0923	19.2241	27.8588
	81	19.206	15.1354	19.3383	27.8071
	80.975	19.2105	14.9281	19.5385	27.7192
	80.95	19.0376	14.9856	19.435	27.6237
	80.925	19.1511	14.8051	19.4487	27.6345
	80.9	19.4519	14.9839	19.4846	27.5725
	80.875	19.4727	14.7639	19.5353	27.3856
	80.85	19.3282	14.9473	19.5198	27.1956
	80.825	19.2389	15.0931	19.4977	27.1418
	80.8	19.4654	15.2785	19.554	27.3154
	80.775	19.5491	15.0178	19.4041	27.3644
	80.75	19.3614	14.9898	19.3727	27.2794
	80.725	19.3027	15.2375	19.6933	27.2953
	80.7	19.3131	15.2602	19.9075	27.5314
	80.675	19.1232	15.1076	19.263	27.6785
	80.65	19.1342	14.9696	18.9859	27.7213
	80.625	19.0807	14.9385	19.0175	27.8634
	80.6	18.9707	14.9287	19.3377	28.1029
	80.575	18.9569	15.0083	19.1676	27.9315
	80.55	18.7592	15.0493	19.1083	27.9334
	80.525	18.7534	15.2841	19.2674	28.3248
	80.5	18.6754	15.0426	19.0479	28.7137
	80.475	18.7041	14.8711	19.0823	28.9392
	80.45	18.7376	14.8279	19.2893	28.8583
	80.425	18.9649	14.9874	19.6907	28.988
	80.4	19.1965	15.1387	19.8364	29.186
	80.375	19.1383	15.3471	19.7898	28.9817
	80.35	19.1334	15.4794	19.7504	28.7267
	80.325	19.0193	15.2952	19.5837	28.6693
	80.3	19.2795	15.1548	19.6856	28.9175
	80.275	18.8938	15.1697	19.3739	28.5244
	80.25	18.8035	15.298	19.5049	27.756
	80.225	18.9391	15.378	19.7614	27.6347
	80.2	18.9824	15.2971	19.9084	28.0043
	80.175	18.7708	15.1242	19.8217	28.136
	80.15	18.8159	15.1744	19.7254	28.4131
	80.125	18.7089	15.1541	19.4644	28.5472
	80.1	18.6872	15.2817	19.3532	28.4321
	80.075	18.3919	15.5163	19.224	28.3982
	80.05	18.5624	15.533	19.4169	28.3208
	80.025	18.2688	15.463	19.5875	28.4734
	80	18.4109	15.2846	19.7752	28.7967
	79.975	18.62	15.305	19.7399	29.1374
	79.95	18.7707	15.5217	19.8368	29.1303
	79.925	18.6543	15.4731	19.8188	28.672
	79.9	18.5155	15.2126	19.4849	28.6105
[truncated: 9,196 more rows]

## Sheet: Fig.1l
Figure. 1l
[truncated: 22 more rows]

[truncated: 54 more sheets: Fig.1m, Fig.1n, Fig.1o, Fig.1p_x0009__x0009__x0009__x0009__x0009__x0009__x0009__x0009__x0009__x0009_, Fig.1q, Fig.1r, Fig.1s, Fig.2b, Fig.2c, Fig.2d, Fig.2e, Fig.2f, Fig.4d, Fig.4h, Fig.5f, Fig.5i, Fig.6b, Fig.6c, Fig.6e, Fig.6h …]
